# Supplementary material for: Single-cell monitoring of dry mass and dry mass density reveals exocytosis of cellular dry contents in mitosis
Source: eLife. 2022 May 10;11:e76664. doi: 10.7554/eLife.76664 (PMC9090323; doi:10.7554/eLife.76664)
Supplement: Figure 3—source data 1. [file elife-76664-fig3-data1.xlsx]

## Sheet: Index
wt L1210 cells										FUCCI L1210 cells																		wt BaF3 cells										wt THP-1 cells						5uM STLC treated wt L1210 cells			50nM Barasertib treated FUCCI L1210 cells
Experiment #	Estimated mitotic entry times (h)				Metaphase/anaphase transition times					Experiment #	Estimated mitotic entry times (h)								Metaphase/anaphase transition times									Experiment #	Estimated mitotic entry times (h)				Metaphase/anaphase transition times					Experiment #	Estimated mitotic entry times (h)		Metaphase/anaphase transition times			Experiment #	Estimated mitotic entry times (h)		Experiment #	Estimated mitotic entry times (h)	Metaphase/anaphase transition times
1	1.03807	14.9589			1.65524	15.4812				1	3.45365	16.991	29.2517	41.9222					3.85445	17.3328	29.7035	42.4258						1	4.18716				4.47023					1	0.335949	33.7866	0.895455	34.2844		1	1.28552		1	1.54587	2.12108
2	0.509557	11.1755	20.5819		1.00956	11.6755	21.0819			2	0.0858258	12.1714	26.4563	38.6758	52.0631	63.7871	78.7616	92.4776	0.586346	12.6335	26.9712	39.1686	52.5412	64.3112	79.3036	93.0011		2	1.19992	10.7887			1.46734	11.2402				2	26.7034		27.2108			2	5.70956		2	3.09251	3.57391
3	1.28901				1.78901					3	1.53941	13.5783	26.7753	43.5279					2.02068	13.9919	27.2584	43.9747						3	0.444436				0.802441					3	23.3166		23.7837			3	3.06975		3	0.501942	1.09784
4	9.58631				10.1098					4	1.9024	15.8918							2.40023	16.3878								4	6.09207				6.59925					4	24.5989		25.3042			4	2.75137		4	0.991528	1.47298
5	0.139003	11.4688	22.7767		0.596337	11.9244	23.2482			5	0.335236	13.4746	26.275	40.7157					0.737691	13.9002	26.7391	41.1186						5	0.955893	15.4567			1.48095	15.895				5	34.9993		35.5258			5	1.5097		5	0.503505	1.03557
6	3.09632	14.5343			3.48692	15.0022				6	1.55398	14.8631	28.6811	46.1404					1.96697	15.302	29.7445	47.0753						6	1.33769				1.69713					6	45.0954		45.5358			6	2.05892		6	3.2045	4.14015
7	1.17095				1.57539					7	1.02186								1.449									7	1.01858				1.29746					7	81.9237		82.5093			7	1.05753		7	1.96792	2.33752
8	0.599896				0.813774					8	7.90539	22.0025							8.36403	22.6053								8	6.17579	19.1406			6.67231	19.6313				8	50.0114		50.6059			8	4.64662		8	2.00112	2.65828
9	1.81935				2.30786					9	0.591832	12.363							0.977401	12.9434								9	28.7507	39.218	49.3541	61.2524	29.4122	39.7054	49.7834	61.6633								9	1.71053
10	3.08288	16.4628			3.64345	16.9018				10	30.3093	44.3744	57.2697						30.7788	44.7567	57.7238							10	74.1674	89.8931			74.6122	90.4128
11	2.69351	14.1228			3.31863	14.7207				11	1.36047								1.82539									11	2.92146				3.42317
12	3.26249	12.7963			3.70503	13.0895				12	11.4156	22.7095							11.9316	23.1986
13	3.04992				3.56916					13	47.0208	60.3588	72.6118						47.5601	60.8357	73.1186
14	1.69363				2.14118
15	17.1966				17.6586
16	4.73173				5.2977
17	2.00733				2.40517
18	3.29009				3.79162
19	1.33165	12.93	23.9778	34.9088	1.74714	13.4399	24.6266	35.3684

## Sheet: wt L1210
Experiment #1					Experiment #2					Experiment #3					Experiment #4					Experiment #5					Experiment #6					Experiment #7					Experiment #8					Experiment #9					Experiment #10
Dry density (g/ml)	Dry volume (fl)	Time (h)	Buoyant mass in H2O media (pg)	Dry mass (pg)	Dry density (g/ml)	Dry volume (fl)	Time (h)	Buoyant mass in H2O media (pg)	Dry mass (pg)	Dry density (g/ml)	Dry volume (fl)	Time (h)	Buoyant mass in H2O media (pg)	Dry mass (pg)	Dry density (g/ml)	Dry volume (fl)	Time (h)	Buoyant mass in H2O media (pg)	Dry mass (pg)	Dry density (g/ml)	Dry volume (fl)	Time (h)	Buoyant mass in H2O media (pg)	Dry mass (pg)	Dry density (g/ml)	Dry volume (fl)	Time (h)	Buoyant mass in H2O media (pg)	Dry mass (pg)	Dry density (g/ml)	Dry volume (fl)	Time (h)	Buoyant mass in H2O media (pg)	Dry mass (pg)	Dry density (g/ml)	Dry volume (fl)	Time (h)	Buoyant mass in H2O media (pg)	Dry mass (pg)	Dry density (g/ml)	Dry volume (fl)	Time (h)	Buoyant mass in H2O media (pg)	Dry mass (pg)	Dry density (g/ml)	Dry volume (fl)	Time (h)	Buoyant mass in H2O media (pg)	Dry mass (pg)
1.38908	215.376	0.00222004	82.5065	299.173	1.40999	179.192	0.00455682	72.3779	252.658	1.44984	160.035	0.00022456	71.5294	232.026	1.40835	103.566	0.00415711	41.7377	145.857	1.40506	177.697	0.00794454	71.0731	249.675	1.39884	142.292	0.00225384	56.0619	199.045	1.39428	186.827	0.00832771	72.7444	260.489	1.3884	186.742	0.00658584	71.5475	259.273	1.38352	188.431	0.00683042	71.2904	260.699	1.37996	169.119	0.00311415	63.4795	233.377
1.39526	212.23	0.0168217	82.5928	296.115	1.41009	178.874	0.0242519	72.2905	252.227	1.40337	181.718	0.0162706	72.3116	255.017	1.39714	106.537	0.020776	41.7655	148.847	1.4062	177.593	0.0314377	71.2403	249.73	1.41912	135.467	0.0233755	56.1105	192.243	1.39668	185.753	0.0238386	72.8018	259.437	1.3893	186.565	0.0212004	71.6761	259.194	1.38909	185.793	0.0218688	71.3603	258.082	1.38872	165.49	0.0183318	63.5972	229.82
1.39844	210.935	0.0357617	82.7493	294.98	1.41296	178.073	0.0437189	72.479	251.61	1.41507	176.809	0.0528756	72.4068	250.198	1.40252	104.896	0.0433024	41.6904	147.12	1.40762	177.33	0.0566755	71.3897	249.613	1.40655	140.446	0.0463356	56.4112	197.545	1.3985	185.297	0.0404744	72.9454	259.137	1.39114	186.062	0.0393713	71.8067	258.838	1.37446	194.098	0.0357255	71.7287	266.78	1.39083	164.763	0.0322707	63.6661	229.157
1.38835	217.161	0.0548567	82.992	301.497	1.41687	176.732	0.0636998	72.6212	250.406	1.41119	179.409	0.0725133	72.7693	253.18	1.38432	110.455	0.0580097	41.8869	152.905	1.40798	177.624	0.0832713	71.5805	250.092	1.42585	134.21	0.0704123	56.502	191.364	1.40258	183.201	0.060956	72.8628	256.954	1.41634	175.269	0.0576038	72.0586	248.239	1.38349	189.747	0.0524115	71.8248	262.512	1.39625	162.863	0.0458305	63.8146	227.397
1.40255	208.902	0.0755937	82.7945	292.995	1.404	183.407	0.0839453	73.0159	257.503	1.41573	177.441	0.0926287	72.7755	251.209	1.39307	107.996	0.0777192	41.8988	150.446	1.40046	181.853	0.109177	71.9352	254.677	1.4192	136.999	0.0914733	56.7669	194.429	1.39309	188.528	0.0806469	73.1932	262.637	1.3875	188.904	0.0764155	72.216	262.104	1.38509	189.189	0.06964	71.9268	262.044	1.3856	167.815	0.0593105	63.9651	232.526
1.39798	212.017	0.0976959	83.0562	296.396	1.41761	177.304	0.10344	72.9946	251.348	1.39975	185.374	0.113564	73.063	259.477	1.39115	108.507	0.096189	41.8872	150.95	1.41806	174.668	0.134523	72.1483	247.69	1.4265	134.622	0.11343	56.7623	192.039	1.39559	187.606	0.100239	73.3076	261.822	1.38589	190.202	0.0937997	72.4136	263.599	1.37856	193.139	0.0917192	72.1311	266.255	1.39873	162.378	0.0732018	64.0253	227.122
1.40059	211.305	0.117912	83.346	295.953	1.40883	180.713	0.123506	72.8204	254.594	1.41025	181.243	0.139607	73.3451	255.598	1.40006	106.52	0.11592	42.0712	149.134	1.40531	180.512	0.155769	72.286	253.675	1.42231	136.271	0.13569	56.8879	193.82	1.39933	186.14	0.118518	73.4395	260.472	1.40344	181.601	0.111994	72.3297	254.866	1.38092	192.501	0.109169	72.3732	265.829	1.3972	163.604	0.0922719	64.2424	228.587
1.39191	216.659	0.13663	83.571	301.57	1.40345	184.648	0.146333	73.42	259.145	1.41237	180.738	0.161637	73.5149	255.269	1.40397	105.071	0.137795	41.8868	147.517	1.42743	171.391	0.181128	72.4008	244.649	1.42304	136.418	0.158141	57.0491	194.129	1.38918	191.626	0.138273	73.6365	266.203	1.39232	187.932	0.131098	72.7488	261.662	1.39389	186.499	0.127448	72.5221	259.96	1.39343	165.294	0.110551	64.3033	230.324
1.39248	216.204	0.155976	83.5034	301.06	1.40967	182.136	0.166676	73.5471	256.751	1.41074	181.752	0.183192	73.6258	256.405	1.38711	110.24	0.158641	42.1021	152.915	1.40939	180.122	0.203443	72.8547	253.863	1.41144	140.618	0.181304	57.1742	198.474	1.38758	192.646	0.159103	73.7188	267.312	1.38959	189.738	0.150484	72.9289	263.658	1.39709	184.984	0.144793	72.5469	258.44	1.40276	162.287	0.130101	64.6102	227.651
1.38744	220.003	0.175248	83.8629	305.242	1.40286	185.598	0.186646	73.6835	260.368	1.414	180.444	0.205999	73.6872	255.148	1.39296	108.671	0.18066	42.1452	151.374	1.42054	175.338	0.228004	72.8686	249.074	1.4341	133.343	0.209136	57.2387	191.227	1.41165	179.983	0.177679	73.2235	254.072	1.38946	190.407	0.173579	73.1524	264.564	1.38322	192.68	0.163836	72.8664	266.52	1.39756	164.726	0.149816	64.7201	230.214
1.38804	220.162	0.195186	84.0531	305.594	1.41073	181.782	0.21149	73.6042	256.446	1.40714	183.996	0.228704	73.8546	258.907	1.40135	106.407	0.202646	42.1544	149.113	1.41299	179.274	0.255797	73.1326	253.312	1.42988	135.011	0.23125	57.3838	193.05	1.39053	191.513	0.195845	73.8627	266.305	1.39319	188.633	0.193273	73.1785	262.802	1.40119	182.991	0.181642	72.5063	256.404	1.40019	163.524	0.167714	64.707	228.964
1.38508	222.032	0.215405	84.112	307.531	1.41967	178.044	0.232416	73.6821	252.763	1.40901	183.586	0.254471	74.0009	258.675	1.39471	108.479	0.227054	42.2543	151.297	1.41806	177.469	0.2811	73.2922	251.661	1.42932	135.911	0.255145	57.687	194.26	1.40405	184.397	0.213852	73.6165	258.902	1.4015	184.644	0.21201	73.1758	258.779	1.39868	184.898	0.200094	72.7906	258.613	1.40146	163.493	0.186547	64.8801	229.128
1.38933	219.877	0.23585	84.2182	305.482	1.41011	183.085	0.252352	74.0155	258.171	1.39287	191.933	0.27864	74.2735	267.337	1.39243	109.135	0.25259	42.2604	151.963	1.41343	180.336	0.306912	73.6405	254.893	1.43498	134.328	0.279678	57.7643	192.757	1.39009	192.713	0.231958	74.2362	267.889	1.39382	189.02	0.230769	73.4527	263.459	1.38375	193.389	0.218169	73.2432	267.602	1.40548	162.283	0.208922	65.0405	228.086
1.39752	215.92	0.25454	84.4842	301.752	1.42113	178.551	0.272158	74.143	253.744	1.40405	186.449	0.303907	74.2459	261.785	1.39417	108.794	0.276257	42.3112	151.678	1.42374	176.245	0.333532	73.7869	250.927	1.41731	140.494	0.304251	57.9347	199.124	1.39251	191.329	0.250561	74.172	266.427	1.4005	185.904	0.250935	73.4735	260.359	1.39919	185.217	0.236038	73.0017	259.154	1.39959	165.069	0.228	65.1964	231.028
1.38505	223.159	0.273861	84.5333	309.087	1.41043	183.528	0.29341	74.2518	258.854	1.4147	181.639	0.326132	74.271	256.965	1.39412	109.099	0.301907	42.427	152.098	1.42624	174.822	0.356768	73.6322	249.339	1.42298	138.99	0.332444	58.0978	197.78	1.39413	190.834	0.268945	74.2924	266.048	1.39294	190.432	0.271678	73.8224	265.261	1.40605	182.111	0.253762	73.0345	256.057	1.40443	162.987	0.246689	65.1804	228.903
1.38694	222.753	0.293885	84.7991	308.945	1.42007	179.381	0.313885	74.298	254.734	1.42088	179.536	0.348602	74.5184	255.099	1.38626	111.453	0.327616	42.466	154.503	1.42753	174.63	0.383064	73.7771	249.29	1.4305	136.601	0.359417	58.1287	195.408	1.39772	188.901	0.287615	74.2171	264.031	1.39827	188.093	0.291117	73.9168	263.006	1.38336	195.034	0.271838	73.7785	269.802	1.40281	164.245	0.266187	65.4132	230.405
1.38112	226.256	0.312993	84.8147	312.486	1.41572	182.117	0.335295	74.6416	257.828	1.40976	185.002	0.372055	74.7143	260.809	1.39583	108.807	0.352591	42.4999	151.875	1.42857	174.571	0.409773	73.9257	249.387	1.42089	140.423	0.385616	58.4077	199.526	1.40581	185.396	0.305601	74.3342	260.63	1.39485	190.342	0.311265	74.1476	265.499	1.39971	186.818	0.289891	73.7394	261.49	1.40386	164.462	0.29115	65.6308	230.881
1.38934	221.41	0.333109	84.8194	307.613	1.42094	179.605	0.356655	74.5473	255.208	1.40908	186.071	0.397655	75.0135	262.19	1.39311	109.81	0.380182	42.5925	152.977	1.41842	179.476	0.434344	74.1867	254.573	1.42299	140.298	0.411357	58.6576	199.642	1.39177	193.452	0.324367	74.8351	269.241	1.39759	189.516	0.333283	74.3421	264.865	1.38987	192.099	0.309837	73.9048	266.992	1.40877	161.71	0.314128	65.3409	227.811
1.38576	224.068	0.352826	85.0362	310.504	1.40421	188.506	0.378772	75.0876	264.703	1.41212	184.537	0.421102	74.9591	260.589	1.39416	109.841	0.405962	42.7195	153.136	1.43796	171.097	0.463781	74.0717	246.031	1.43356	137.185	0.439147	58.8066	196.663	1.40097	188.333	0.342429	74.5972	263.849	1.39029	193.682	0.353587	74.5608	269.274	1.38835	193.246	0.328909	74.0569	268.293	1.40923	162.626	0.336004	65.8027	229.178
1.38673	223.74	0.372317	85.1287	310.267	1.40514	187.613	0.400231	74.8975	263.621	1.40743	187.265	0.444646	75.1868	263.563	1.38752	111.875	0.430004	42.7658	155.229	1.42039	178.316	0.48824	74.0621	253.278	1.42527	140.154	0.464428	58.9176	199.757	1.40211	188.212	0.359845	74.7581	263.894	1.38699	195.861	0.374999	74.7543	271.658	1.38983	191.977	0.347167	73.86	266.816	1.39541	169.235	0.356978	66.1127	236.153
1.38097	227.629	0.391858	85.2931	314.349	1.4066	188.014	0.424293	75.3318	264.46	1.41669	183.193	0.468169	75.2475	259.527	1.38922	111.608	0.453874	42.8508	155.048	1.44304	169.365	0.518607	74.1754	244.4	1.42092	142.009	0.491656	59.0765	201.784	1.3961	191.318	0.378031	74.8467	267.099	1.39555	191.659	0.395824	74.7871	267.47	1.38838	194.38	0.366762	74.4912	269.873	1.41805	159.031	0.379714	65.7219	225.514
1.39426	219.428	0.412753	85.1234	305.94	1.416	183.685	0.445975	75.3243	260.098	1.40738	187.201	0.491502	75.1639	263.463	1.39678	109.445	0.479256	42.8532	152.87	1.42031	178.493	0.542651	74.1265	253.515	1.43266	137.883	0.514502	58.98	197.54	1.39525	192.474	0.396541	75.1255	268.549	1.38936	195.205	0.41605	74.964	271.21	1.38571	195.92	0.39029	74.5458	271.488	1.40152	167.291	0.397739	66.3948	234.463
1.40864	212.095	0.431743	85.3476	298.766	1.42401	179.878	0.465906	75.2015	256.148	1.39852	192.289	0.515622	75.5053	268.92	1.39361	110.703	0.505	42.9893	154.276	1.43152	174.167	0.567402	74.2876	249.323	1.4167	144.294	0.541782	59.4157	204.422	1.39262	194.245	0.41698	75.2916	270.509	1.39124	194.781	0.437568	75.1649	270.988	1.39414	191.485	0.409553	74.4782	266.957	1.40924	164.251	0.42175	66.4286	231.468
1.39745	218.967	0.450857	85.6543	305.994	1.40756	188.527	0.490009	75.6979	265.363	1.40142	191.577	0.540124	75.7801	268.479	1.39201	111.199	0.530634	43.0083	154.79	1.388	194.814	0.61871	74.6119	270.401	1.41512	145.358	0.572352	59.6244	205.699	1.40402	188.248	0.435016	75.1275	264.304	1.39541	192.646	0.457585	75.1483	268.82	1.38972	195.103	0.432157	75.0153	271.138	1.41038	163.637	0.43929	66.3887	230.79
1.38898	224.105	0.471329	85.7489	311.278	1.42073	182.378	0.513069	75.647	259.11	1.41258	186.809	0.565262	75.9649	263.883	1.38941	112.349	0.571815	43.1355	156.098	1.41422	181.643	0.646768	74.3325	256.883	1.42112	143.651	0.603047	59.7858	204.145	1.40561	187.92	0.453197	75.2964	264.142	1.39013	195.839	0.477683	75.3588	272.241	1.37117	204.82	0.451935	74.9639	280.843	1.39665	170.074	0.458159	66.6637	237.534
1.40502	214.921	0.493261	85.685	301.968	1.40225	192.228	0.535053	76.1793	269.553	1.42154	182.247	0.588413	75.7569	259.071	1.39418	111.262	0.598948	43.2655	155.12	1.42032	179.606	0.700246	74.5928	255.097	1.41375	146.74	0.628113	59.9943	207.453	1.39539	193.545	0.473016	75.549	270.071	1.38378	199.804	0.497572	75.619	276.484	1.39029	194.265	0.469175	74.8319	270.084	1.38528	175.785	0.476012	66.9071	243.511
1.38888	225.162	0.514788	86.1327	312.722	1.40007	193.572	0.558182	76.2765	271.015	1.40033	193.596	0.61126	76.3679	271.098	1.38874	112.841	0.630309	43.2501	156.708	1.40459	187.671	0.725658	74.9987	263.601	1.42278	143.774	0.656664	60.0765	204.559	1.38175	201.475	0.493272	75.8977	278.387	1.4027	188.418	0.515379	74.8912	264.294	1.3774	202.547	0.487526	75.4055	278.988	1.40902	164.494	0.502507	66.4565	231.776
1.40753	214.306	0.533993	85.9838	301.641	1.4118	188.11	0.581146	76.3466	265.574	1.40683	190.942	0.634929	76.5545	268.623	1.3997	109.649	0.657505	43.2452	153.475	1.41093	184.726	0.75349	74.9892	260.637	1.41204	147.921	0.683315	60.2225	208.869	1.39613	193.532	0.511835	75.6949	270.196	1.39322	195.231	0.539145	75.7108	271.999	1.38498	198.727	0.507291	75.4813	275.234	1.39534	172.385	0.52087	67.3328	240.534
1.3961	220.897	0.555234	86.0882	308.394	1.41634	186.299	0.603393	76.4547	263.863	1.40407	192.248	0.657921	76.5574	269.93	1.38545	114.467	0.683602	43.5117	158.587	1.41131	184.696	0.775836	75.0498	260.664	1.41926	146.022	0.710699	60.5031	207.243	1.39026	197.218	0.53249	75.966	274.184	1.38554	199.648	0.559305	75.9007	276.62	1.3894	195.945	0.525472	75.2959	272.246	1.41974	159.969	0.540181	66.3859	227.115
1.39905	219.287	0.576233	86.1032	306.792	1.45169	170.935	0.626037	76.1887	248.145	1.4258	181.95	0.681006	76.41	259.425	1.39018	113.331	0.709977	43.6085	157.551	1.3982	190.832	0.800801	75.0456	266.823	1.41243	148.703	0.73848	60.5971	210.033	1.38828	198.84	0.551877	76.1976	276.045	1.38939	197.583	0.579476	75.8783	274.52	1.38464	199.868	0.544637	75.8423	276.745	1.37909	179.737	0.559799	67.2859	247.873
1.39048	225.066	0.598959	86.4385	312.95	1.45087	171.89	0.648847	76.4762	249.39	1.40867	190.724	0.704513	76.8216	268.667	1.38546	114.656	0.736468	43.59	158.851	1.41457	183.447	0.83204	75.1396	259.499	1.42126	145.679	0.764789	60.6539	207.047	1.39244	196.3	0.570325	76.0472	273.336	1.3818	201.588	0.599896	75.8796	278.554	1.40217	189.662	0.562533	75.3131	265.938	1.39144	174.528	0.578788	67.4621	242.844
1.39081	225.282	0.621308	86.5997	313.325	1.41656	188.097	0.672453	77.2199	266.45	1.40018	195.279	0.72771	77.0004	273.425	1.39024	113.586	0.762448	43.7129	157.912	1.4064	186.978	0.860437	75.0561	262.965	1.41525	148.555	0.791498	60.959	210.243	1.40516	190.305	0.589502	76.1428	267.41	1.40711	187.894	0.622823	75.4772	264.387	1.40409	189.284	0.580721	75.5209	265.771	1.39248	173.886	0.588856	67.4638	242.134
1.38973	226.015	0.641895	86.6435	314.098	1.45691	171.107	0.768241	77.1587	249.287	1.39469	198.65	0.755009	77.2305	277.056	1.39258	112.675	0.789352	43.6387	156.909	1.40204	189.124	0.887327	75.1	265.16	1.42337	145.739	0.817865	60.9892	207.441	1.38772	200.183	0.608779	76.5943	277.797	1.40614	188.447	0.643839	75.5248	264.983	1.37928	203.505	0.599466	76.1372	280.691	1.40481	168.089	0.606908	67.2545	236.133
1.40115	219.619	0.664477	86.687	307.72	1.4429	176.969	0.813755	77.3201	255.349	1.40902	191.449	0.779102	77.1925	269.755	1.38503	115.619	0.817764	43.89	160.136	1.39742	191.319	0.919737	75.083	267.352	1.41735	148.433	0.845589	61.22	210.382	1.39789	194.547	0.627368	76.4296	271.956	1.40313	190.706	0.663925	75.8589	267.585	1.39928	191.948	0.617557	75.6621	268.589	1.41188	165.8	0.62428	67.4834	234.089
1.39867	221.359	0.686204	86.8247	309.607	1.45678	171.931	0.838901	77.5184	250.466	1.39808	197.953	0.80256	77.6362	276.755	1.39943	111.234	0.845552	43.8418	155.664	1.39765	192.125	0.94699	75.4433	268.522	1.42255	146.795	0.872564	61.311	208.824	1.40229	192.422	0.646368	76.438	269.832	1.41624	184.17	0.693925	75.6709	260.828	1.39975	192.419	0.639155	75.9425	269.34	1.39967	172.189	0.643108	67.9642	241.007
1.39283	225.631	0.720171	87.1755	314.265	1.43237	183.256	0.861948	78.1359	262.489	1.40554	194.654	0.826096	77.7884	273.593	1.38469	116.124	0.871794	44.0593	160.795	1.39106	195.653	0.977515	75.5441	272.164	1.41834	148.918	0.898673	61.5714	211.216	1.39424	197.315	0.665326	76.7903	275.105	1.42687	179.178	0.71873	75.5244	255.663	1.38533	201.623	0.657729	76.656	279.316	1.39808	173.915	0.713925	68.3354	243.146
1.39724	222.879	0.743412	87.0998	311.415	1.45261	174.316	0.904651	77.8643	253.213	1.41005	191.99	0.849698	77.6038	270.716	1.39235	114.249	0.899907	44.2044	159.075	1.41698	182.891	1.00997	75.3569	259.152	1.41104	151.534	0.927769	61.543	213.821	1.38549	202.43	0.68573	77.007	280.465	1.4391	173.875	0.737799	75.4265	250.224	1.40307	191.082	0.675028	76.0498	268.101	1.40359	171.165	0.722503	68.2604	240.245
1.3954	224.489	0.765443	87.313	313.252	1.43159	183.821	0.925035	78.2488	263.157	1.41203	192.265	0.878017	78.0969	271.484	1.3993	111.839	0.926852	44.0676	156.497	1.3926	195.469	1.03374	75.7751	272.211	1.41386	151.087	0.957209	61.7898	213.615	1.38642	202.087	0.706314	77.0631	280.177	1.41367	185.871	0.758154	75.8988	262.761	1.39434	196.408	0.693491	76.4435	273.86	1.40072	172.352	0.737843	68.2336	241.418
1.40642	218.193	0.78648	87.2701	306.871	1.45492	173.483	0.945418	77.8891	252.404	1.4021	197.806	0.902225	78.3654	277.344	1.39937	112.039	0.953411	44.1546	156.784	1.42046	87.5663	1.08348	36.3886	124.385	1.43343	144.215	0.986086	61.803	206.723	1.40486	192.492	0.725155	76.9658	270.424	1.4217	181.388	0.778998	75.5238	257.88	1.39815	194.02	0.711407	76.2581	271.269	1.39927	173.588	0.753743	68.4656	242.896
1.40113	221.938	0.808266	87.5943	310.965	1.44644	177.055	0.966086	77.9876	256.099	1.41445	191.921	0.925829	78.4048	271.463	1.3882	115.792	0.978922	44.3408	160.743	1.41878	87.9107	1.10682	36.3859	124.726	1.41903	149.708	1.01219	62.0025	212.439	1.40163	193.945	0.743936	76.91	271.839	1.37624	204.596	0.813774	75.9942	281.573	1.40064	193.401	0.729642	76.5025	270.885	1.41678	165.74	0.769064	68.2844	234.817
1.3993	222.98	0.828762	87.5996	312.015	1.43444	181.824	0.986057	77.916	260.815	1.40074	198.709	0.948881	78.4666	278.339	1.38521	116.836	1.00644	44.381	161.843	1.4278	86.4218	1.12994	36.5478	123.393	1.4153	151.474	1.04101	62.1673	214.38	1.38523	203.61	0.763114	77.4051	282.047	1.39181	195.787	0.824933	75.7001	272.498	1.3785	206.927	0.748724	77.2572	285.249	1.41266	167.685	0.785811	68.3895	236.882
1.3928	227.751	0.851582	87.9977	317.211	1.42509	186.743	1.00956	78.2579	266.125	1.4172	191.247	0.974636	78.6662	271.034	1.39443	114.263	1.03171	44.4714	159.332	1.40859	90.6241	1.15119	36.584	127.652	1.41461	152.289	1.06799	62.4006	215.429	1.4013	194.72	0.782895	77.1571	272.861	1.39338	194.667	0.851822	75.5323	271.245	1.38388	203.884	0.768096	77.2148	282.152	1.41102	168.91	0.802544	68.6092	238.336
1.39644	225.09	0.869777	87.8059	314.324	1.45084	174.196	1.05503	77.4972	252.729	1.40827	196.294	0.998737	78.9808	276.435	1.38563	116.811	1.05702	44.4348	161.857	1.41671	88.9855	1.17356	36.6485	126.067	1.43822	142.86	1.09172	61.9075	205.464	1.38441	204.481	0.80243	77.573	283.085	1.37349	206.213	0.874104	75.9159	283.233	1.39538	197.124	0.786354	76.9356	275.062	1.41913	165.334	0.820001	68.5044	234.631
1.40359	221.708	0.888447	88.0711	311.187	1.40213	197.801	1.07824	78.3527	277.342	1.39839	201.499	1.02224	79.085	281.773	1.38926	116.011	1.08293	44.5461	161.169	1.43545	85.0416	1.20057	36.6154	122.073	1.42206	149.803	1.11918	62.4977	213.03	1.40221	195.137	0.821283	77.5058	273.622	1.4101	185.75	0.90096	75.1824	261.926	1.39027	200.381	0.804943	77.1854	278.583	1.40414	172.616	0.838544	68.9129	242.377
1.40243	222.079	0.906962	87.9599	311.45	1.41231	192.166	1.09991	78.0902	271.397	1.41688	192.615	1.04594	79.1615	272.912	1.38892	116.626	1.10851	44.7472	161.984	1.43296	85.7763	1.22215	36.7173	122.914	1.41904	151.407	1.14913	62.7086	214.852	1.40562	193.155	0.840172	77.3717	271.503	1.38851	197.589	0.920314	75.7188	274.353	1.40074	194.955	0.823065	77.137	273.081	1.39634	176.385	0.856169	69.0623	246.294
1.39807	225.329	0.925879	88.2591	315.025	1.3892	205.03	1.12212	78.5795	284.828	1.41601	193.121	1.06926	79.2118	273.46	1.38084	119.446	1.13594	44.866	164.936	1.42231	87.716	1.24359	36.6146	124.759	1.40761	156.214	1.17488	62.9161	219.888	1.38716	204.414	0.861298	78.1054	283.554	1.40973	185.797	0.95092	75.1325	261.924	1.38855	202.277	0.845261	77.5415	280.871	1.40587	171.905	0.873897	68.9463	241.676
1.39429	228.457	0.944112	88.6288	318.535	1.40313	198.392	1.14318	78.8094	278.369	1.42955	186.492	1.09193	79.0392	266.601	1.39698	114.207	1.1617	44.735	159.545	1.42301	87.8237	1.26701	36.7219	124.974	1.43159	147.792	1.20374	63.0643	211.577	1.40321	195.405	0.880254	77.8069	274.194	1.3871	102.652	0.968002	39.2086	142.389	1.40807	191.78	0.863449	77.2843	270.039	1.40329	174.122	0.893509	69.3656	244.344
1.40177	224.038	0.961733	88.6005	314.049	1.40062	198.332	1.16493	78.2709	277.787	1.39989	201.961	1.11462	79.5998	282.724	1.38057	119.783	1.19325	44.9383	165.369	1.41476	89.8193	1.30944	36.8148	127.073	1.42549	150.028	1.23425	63.1043	213.862	1.39786	198.592	0.898671	78.0117	277.604	1.38067	104.879	0.99608	39.3663	144.804	1.39914	196.441	0.881446	77.408	274.848	1.40063	175.247	0.912543	69.3543	245.455
1.39358	228.856	0.979887	88.62	318.93	1.39937	199.542	1.19468	78.4923	279.233	1.40786	198.47	1.13841	79.8116	279.419	1.38734	117.526	1.21831	44.9072	163.048	1.42094	88.4506	1.33248	36.8033	125.683	1.40931	156.858	1.26261	63.4427	221.061	1.40978	192.215	0.916924	77.8086	270.981	1.39517	101.157	1.01709	39.4373	141.13	1.3965	197.721	0.899838	77.383	276.117	1.39318	179.056	0.930539	69.5465	249.456
1.40728	220.949	0.998306	88.5827	310.937	1.40183	197.93	1.21675	78.3632	277.465	1.41099	197.439	1.16152	79.9994	278.585	1.38791	117.929	1.24792	45.1033	163.675	1.40179	93.169	1.35619	36.9858	130.604	1.42709	150.154	1.28971	63.4019	214.284	1.40881	193.02	0.935952	77.9395	271.929	1.39432	101.408	1.037	39.4552	141.395	1.38072	208.081	0.918006	78.1588	287.302	1.41692	168.855	0.947723	69.5923	239.255
1.39627	228.353	1.01666	89.035	318.844	1.42533	186.142	1.23811	78.0758	265.314	1.4015	202.104	1.18388	79.9909	283.25	1.38949	117.51	1.27541	45.1505	163.279	1.41212	90.8507	1.37919	36.9991	128.292	1.41106	157.004	1.31634	63.7763	221.542	1.4022	196.889	0.955362	78.2019	276.077	1.39561	101.245	1.05745	39.5179	141.299	1.39948	197.686	0.936268	77.9611	276.657	1.41196	170.8	0.965371	69.5471	241.163
1.40777	221.268	1.03495	88.8189	311.494	1.39889	200.256	1.26064	78.6871	280.136	1.40298	201.833	1.21295	80.1537	283.167	1.40115	114.082	1.30258	45.1495	159.847	1.41686	89.8449	1.40576	37.0164	127.298	1.42637	151.399	1.34358	63.8193	215.952	1.40069	197.756	0.972783	78.2517	276.996	1.37523	106.687	1.08169	39.4635	146.719	1.3871	205.059	0.955578	78.3305	284.437	1.39627	178.489	0.98276	69.8768	249.219
1.40311	224.988	1.05364	89.2602	315.683	1.42378	188.103	1.28292	78.6051	267.817	1.42084	193.315	1.23712	80.2521	274.669	1.38744	118.595	1.32631	45.3051	164.544	1.42248	88.7055	1.42816	37.0481	126.182	1.4105	157.657	1.37189	63.9552	222.376	1.3903	204.251	0.992032	78.6891	283.969	1.3909	97.4364	1.12523	37.57	135.524	1.38741	204.11	0.973652	78.0328	283.184	1.41394	170.305	1.00064	69.681	240.802
1.39529	229.807	1.07217	89.3736	320.647	1.44784	176.499	1.30513	77.9982	255.543	1.41548	196.675	1.25976	80.5919	278.39	1.39551	116.096	1.35269	45.3056	162.012	1.44562	84.2485	1.45493	37.1291	121.792	1.40316	161.259	1.40124	64.2297	226.272	1.39491	201.847	1.01141	78.6949	281.558	1.38277	99.4556	1.13955	37.5529	137.525	1.3924	202.611	0.992825	78.4598	282.115	1.39565	179.387	1.0178	70.1173	250.363
1.41544	218.399	1.09074	89.34	309.131	1.39501	203.246	1.32758	79.0893	283.53	1.41462	196.689	1.28194	80.4298	278.24	1.38746	119.048	1.38222	45.4842	165.174	1.41181	91.4376	1.47856	37.2095	129.093	1.4304	150.857	1.43157	64.1993	215.786	1.38787	206.179	1.03053	78.9298	286.149	1.3736	101.995	1.15435	37.573	140.1	1.40934	192.924	1.0115	77.9855	271.896	1.43277	162.749	1.03483	69.6507	233.182
1.40521	224.707	1.10907	89.6261	315.761	1.40769	196.807	1.34935	79.083	277.044	1.41575	197.071	1.30436	80.8115	279.004	1.38453	119.756	1.40874	45.4265	165.805	1.4329	86.8668	1.50837	37.1795	124.472	1.40567	160.777	1.45933	64.4459	225.999	1.3991	199.791	1.04894	78.7362	279.528						1.39686	199.772	1.02886	78.2724	279.054	1.40132	176.973	1.05236	70.1786	247.996
1.39907	228.941	1.12709	89.9104	320.305	1.41795	191.881	1.37228	79.0579	272.077	1.41312	198.272	1.32659	80.7719	280.181	1.38892	118.77	1.4338	45.5658	164.962	1.43979	85.5754	1.53274	37.2171	123.211	1.41893	155.879	1.48774	64.5516	221.181	1.387	207.674	1.07176	79.3146	288.045						1.40995	193.171	1.04605	78.2126	272.362	1.40377	176.056	1.07078	70.2233	247.141
1.40723	223.393	1.14519	89.5526	314.365	1.42442	186.994	1.3944	78.2652	266.358	1.41875	195.984	1.34862	80.9524	278.052	1.37634	123.584	1.46128	45.8447	170.093	1.42925	87.7489	1.55547	37.2443	125.415	1.41965	156.15	1.51438	64.7719	221.678	1.39072	205.59	1.09148	79.2906	285.919						1.40068	198.121	1.06389	78.3822	277.503	1.42563	166.229	1.08778	69.9546	236.98
1.39095	234.841	1.17187	90.2927	326.654	1.40404	198.078	1.41613	78.8702	278.11	1.41638	197.997	1.37127	81.3078	280.44	1.3878	119.568	1.49076	45.7314	165.936	1.43866	86.2055	1.57961	37.397	124.021	1.41127	159.652	1.54045	64.8914	225.311	1.39804	201.218	1.11002	79.0865	281.312						1.39163	203.191	1.08214	78.5386	282.767	1.40596	175.8	1.10553	70.527	247.168
1.38897	236.329	1.19458	90.3991	328.254	1.38142	211.155	1.43853	79.2882	291.695	1.42188	195.571	1.39391	81.3903	278.079	1.38435	121.06	1.51582	45.8974	167.589	1.418	90.4084	1.60223	37.3599	128.2	1.40915	160.628	1.5665	64.9483	226.35	1.40559	197.498	1.12887	79.109	277.601						1.40007	199.278	1.10011	78.716	279.003	1.42258	167.726	1.12341	70.0792	238.604
1.40872	224.082	1.21453	90.1466	315.668	1.40374	198.773	1.46018	79.0911	279.025	1.40432	205.072	1.41707	81.7332	287.987	1.388	119.994	1.54126	45.9218	166.552	1.41456	91.5849	1.62931	37.5207	129.553	1.42141	156.221	1.5981	65.0778	222.053	1.39873	201.975	1.14784	79.5184	282.51						1.38963	205.619	1.11839	79.0609	285.734	1.41523	171.279	1.14074	70.3033	242.4
1.40496	226.62	1.23465	90.3194	318.393	1.4087	196.897	1.48213	79.325	277.369	1.43874	187.963	1.43901	81.3883	270.429	1.38323	121.699	1.56799	46.0002	168.338	1.41909	90.8747	1.65507	37.6447	128.96	1.41292	159.787	1.6266	65.208	225.766	1.38596	209.521	1.16763	79.809	290.388						1.40703	195.5	1.13651	78.5847	275.075	1.40428	176.665	1.15805	70.5786	248.088
1.39972	229.912	1.25734	90.4152	321.811	1.38581	209.968	1.50434	79.7809	290.974	1.4293	192.579	1.46157	81.5753	275.253	1.39389	118.474	1.59198	46.0468	165.14	1.4194	90.68	1.67761	37.6007	128.711	1.41839	158.219	1.65745	65.4368	224.416	1.38261	212.201	1.18739	80.12	293.391						1.41023	194.205	1.15461	78.6728	273.872	1.40609	176.393	1.17593	70.7917	248.024
1.40961	224.528	1.27763	90.5347	316.497	1.43153	94.9667	1.54708	40.4266	135.948	1.41836	199.285	1.4875	82.2052	282.657	1.38527	121.459	1.61857	46.1393	168.253	1.42057	90.7437	1.70336	37.7234	128.908	1.4183	158.61	1.68473	65.5821	224.956	1.4096	196.786	1.20646	79.622	277.389						1.39385	204.255	1.17355	79.3965	284.701	1.40398	177.699	1.19394	70.9277	249.486
1.40712	226.874	1.29755	90.9052	319.238	1.42517	96.4384	1.56829	40.4409	137.441	1.44564	186.082	1.50946	81.8564	269.007	1.38164	122.633	1.64472	46.1537	169.435	1.43989	86.7073	1.72686	37.7209	124.849	1.41347	160.775	1.71241	65.7008	227.25	1.40738	198.48	1.22508	79.861	279.336						1.41267	193.301	1.19056	78.7899	273.071	1.40181	179.21	1.21145	71.1579	251.218
1.41388	222.806	1.31934	90.7766	315.02	1.42551	96.1916	1.59003	40.3682	137.122	1.43793	189.878	1.53039	82.0624	273.032	1.38813	120.724	1.67033	46.2125	167.58	1.44575	85.3785	1.75121	37.6431	123.436	1.41981	158.6	1.73894	65.8185	225.182	1.418	193.1	1.24431	79.753	273.817						1.38312	210.713	1.21028	79.6449	291.443	1.40853	175.461	1.2288	70.8466	247.142
1.4007	230.896	1.34052	91.0368	323.417	1.41415	99.3686	1.61158	40.5749	140.522	1.44312	187.695	1.55135	82.0935	270.865	1.38226	123.044	1.69769	46.3743	170.079	1.41475	92.1369	1.77428	37.7694	130.351	1.41927	159.248	1.76605	65.9997	226.015	1.39934	204.259	1.26411	80.5396	285.828						1.39075	206.657	1.23018	79.6872	287.409	1.4006	180.327	1.24874	71.3533	252.566
1.42151	219.478	1.36307	91.1001	311.989	1.43255	94.5407	1.63251	40.3392	135.434	1.43968	189.598	1.5725	82.2745	272.96	1.38877	120.772	1.72363	46.3154	167.725	1.42838	89.2987	1.80113	37.8208	127.553	1.41334	162.188	1.79239	66.2614	229.227	1.39134	209.389	1.28335	80.8856	291.331						1.38929	207.227	1.24907	79.6234	287.898	1.41371	174.47	1.26661	71.3495	246.651
1.41389	224.288	1.3845	91.3935	317.119	1.41582	98.9646	1.65325	40.5718	140.116	1.45206	184.284	1.59345	82.2505	267.591	1.38333	123.188	1.74963	46.5766	170.409	1.42373	90.9508	1.82583	38.0978	129.49	1.39828	168.327	1.81859	66.233	235.368	1.41229	197.224	1.30258	80.3246	278.537						1.40782	197.189	1.26667	79.4223	277.605	1.41016	175.328	1.2843	71.0794	247.241
1.41714	222.742	1.40575	91.4819	315.658	1.42686	96.1877	1.6748	40.4972	137.246	1.48381	170.681	1.61405	81.5997	253.257	1.3914	120.891	1.77521	46.689	168.207	1.41406	92.9374	1.84852	38.0373	131.419	1.40377	166.447	1.84613	66.4107	233.654	1.424	191.696	1.32142	80.3271	272.974						1.38285	212.011	1.28544	80.0844	293.179	1.42699	168.368	1.30152	71.0901	240.26
1.42535	217.994	1.42642	91.3218	310.718	1.42482	96.8585	1.69604	40.5823	138.005	1.45133	185.21	1.63551	82.5243	268.8	1.38694	122.286	1.80283	46.6782	169.602	1.43137	89.1888	1.87552	38.0428	127.662	1.40293	167.192	1.87627	66.5637	234.558	1.42501	191.609	1.34134	80.4721	273.044						1.40038	201.193	1.30356	79.5239	281.748	1.40733	177.522	1.31862	71.4633	249.831
1.42983	215.942	1.44802	91.43	308.761	1.41294	99.9534	1.717	40.6909	141.229	1.44818	187.067	1.65716	82.7663	270.907	1.38762	122.37	1.8279	46.7949	169.802	1.43203	89.0457	1.89838	38.0401	127.516	1.41762	161.528	1.9034	66.6812	228.985	1.42282	193.035	1.36086	80.6448	274.653						1.41654	193.062	1.32263	79.432	273.48	1.40334	180.136	1.33778	71.7948	252.793
1.42885	216.811	1.46767	91.597	309.791	1.42176	97.8875	1.73874	40.7155	139.172	1.44441	188.872	1.67856	82.8534	272.808	1.39462	120.159	1.85188	46.7904	167.577	1.40858	94.6294	1.92226	38.2044	133.293	1.42446	159.217	1.93162	66.8181	226.799	1.39631	208.238	1.38007	81.4769	290.765						1.41065	196.422	1.34039	79.6744	277.084	1.42687	169.304	1.3543	71.4561	241.574
1.43161	215.336	1.48762	91.5716	308.278	1.41293	100.478	1.75993	40.9034	141.968	1.44789	187.581	1.70064	82.9457	271.596	1.37273	128.576	1.87725	47.25	176.5	1.42695	90.0371	1.94677	38.0089	128.478	1.40398	167.653	1.96062	66.9236	235.381	1.42957	189.828	1.39914	80.6108	271.373						1.39012	207.545	1.35751	79.9244	288.514	1.40558	179.329	1.37301	71.8582	252.061
1.43187	215.188	1.50784	91.5502	308.12	1.42678	96.7139	1.78012	40.7113	137.99	1.44122	190.986	1.72172	83.1731	275.254	1.39251	121.312	1.90204	46.9868	168.929	1.42139	92.3229	1.97098	38.4581	131.227	1.40664	167.152	1.99059	67.1668	235.122	1.41908	195.522	1.41814	80.9562	277.462						1.40592	198.793	1.37533	79.6954	279.487	1.41875	172.787	1.39049	71.5267	245.142
1.43176	215.582	1.52993	91.6977	308.662	1.42869	96.3435	1.80114	40.7388	137.645	1.44192	190.709	1.74419	83.1841	274.987	1.38356	124.541	1.92742	47.1198	172.31	1.43106	89.8518	1.99394	38.2984	128.583	1.41068	165.806	2.01921	67.3004	233.9	1.42263	194.209	1.43841	81.1062	276.288						1.38196	213.911	1.39428	80.6081	295.617	1.39993	182.58	1.40832	72.1421	255.6
1.43079	216.895	1.55155	92.0506	310.331	1.42405	97.197	1.82248	40.652	138.413	1.40466	210.64	1.7672	84.0121	295.877	1.38489	124.337	1.95192	47.2093	172.193	1.42857	90.817	2.01753	38.4812	129.739	1.41778	163.1	2.0499	67.3582	231.241	1.4205	195.482	1.45742	81.2231	277.682						1.41093	197.078	1.41225	79.9815	278.064	1.39475	185.472	1.4267	72.3328	258.686
1.43101	216.528	1.57184	91.9283	309.854	1.40782	101.927	1.84637	40.9768	143.495	1.46389	181.097	1.78901	82.9645	265.106	1.39199	122.125	1.97663	47.2317	169.997	1.42485	91.3789	2.04122	38.3816	130.201	1.41089	166.555	2.07709	67.6377	234.99	1.42941	191.172	1.47719	81.1328	273.263						1.39665	204.997	1.43004	80.2729	286.309	1.40446	181.022	1.44467	72.3365	254.239
1.4262	219.626	1.59344	92.1997	313.23	1.40254	103.69	1.86793	41.1378	145.429	1.42666	198.118	1.8109	83.3963	282.647	1.38064	126.513	2.00194	47.497	174.669	1.40578	96.2969	2.06688	38.6157	135.373	1.40328	170.398	2.10445	67.9045	239.117	1.42587	193.524	1.49903	81.4373	275.94						1.38821	210.884	1.45026	80.7848	292.751	1.4008	183.171	1.46308	72.5439	256.586
1.40716	230.023	1.61459	92.184	323.679	1.43693	94.7375	1.88986	40.8441	136.131	1.41034	206.681	1.8347	83.6049	291.49	1.3838	125.444	2.02858	47.4898	173.589	1.41733	93.6413	2.09189	38.6266	132.72	1.40611	169.371	2.1347	67.9756	238.155	1.41856	196.676	1.51775	81.3334	278.997						1.3991	204.291	1.46782	80.5038	285.824	1.41999	173.969	1.48105	72.2356	247.035
1.42937	216.224	1.63494	91.4593	309.065	1.41414	100.382	1.91116	40.991	141.955	1.42821	196.28	1.85741	82.905	280.329	1.38176	126.479	2.05507	47.6243	174.764	1.40811	96.1397	2.12007	38.7668	135.375	1.40621	169.892	2.16424	68.1997	238.904	1.42895	191.363	1.53775	81.1177	273.447						1.39744	206.026	1.48617	80.8315	287.908	1.40343	181.61	1.49694	72.3984	254.877
1.39854	233.827	1.65524	91.7097	327.018	1.42513	97.4662	1.93152	40.8671	138.902	1.40013	211.737	1.88094	83.487	296.46	1.39461	122.344	2.0805	47.6274	170.623	1.41176	95.2758	2.14559	38.7697	134.506	1.41871	164.823	2.19189	68.2238	233.835	1.44291	184.951	1.55622	80.9988	266.867						1.39796	204.898	1.50414	80.5131	286.44	1.42173	173.64	1.51316	72.3998	246.87
1.3956	236.058	1.67562	91.8798	329.442	1.40505	103.363	1.95287	41.2636	145.229	1.41251	205.317	1.90374	83.495	290.013	1.37869	128.281	2.10866	47.8871	176.86	1.43234	90.5495	2.17055	38.7131	129.697	1.41432	166.856	2.21938	68.3339	235.989	1.42163	194.392	1.57539	80.9828	276.354						1.39076	209.43	1.52214	80.7708	291.268	1.41209	178.281	1.52959	72.6073	251.749
1.40006	232.997	1.69654	91.7195	326.209	1.4043	103.154	1.97304	41.0994	144.859	1.38429	221.236	1.92718	83.7488	306.255	1.39292	123.268	2.13462	47.7896	171.701	1.40637	96.8422	2.19501	38.8865	136.196	1.41292	167.899	2.24728	68.5239	237.228	1.40297	204.987	1.59667	81.567	287.591						1.40049	203.982	1.5399	80.6555	285.675	1.41285	177.636	1.54596	72.485	250.972
1.42568	218.221	1.71685	91.4915	311.112	1.40309	103.843	1.99364	41.2509	145.701	1.44578	188.667	1.94905	83.017	272.771	1.38195	127.459	2.16158	48.021	176.142	1.41955	93.7558	2.22514	38.8799	133.091	1.43494	158.954	2.27189	68.3779	228.09	1.38862	213.094	1.61912	81.7318	295.906						1.39394	208.871	1.55892	81.2159	291.154	1.39632	186.792	1.56377	73.1403	260.82
1.37795	247.131	1.73886	91.8103	340.535	1.40069	104.88	2.0168	41.4111	146.904	1.39792	213.33	1.98015	83.6363	298.218	1.38895	124.954	2.18605	47.9389	173.555	1.42452	93.1949	2.25311	39.1101	132.758	1.41848	166.102	2.29942	68.7187	235.613	1.37813	218.282	1.63827	81.4476	300.822						1.39843	205.813	1.57716	80.9668	287.815	1.3981	186.33	1.58182	73.2719	260.508
1.42148	220.577	1.76065	91.5527	313.546	1.40459	103.269	2.04019	41.1797	145.05	1.38694	218.986	2.00309	83.4584	303.719	1.38457	126.794	2.21084	48.0937	175.556	1.43244	91.2018	2.2772	38.998	130.641	1.41022	170.455	2.32852	69.1099	240.38	1.39196	209.568	1.65767	81.0939	291.709						1.38684	213.662	1.59765	81.555	296.316	1.39718	186.712	1.59999	73.255	260.871
1.43408	213.689	1.78305	91.3813	306.447	1.40972	102.423	2.06325	41.3603	144.388	1.39288	216.292	2.03187	83.716	301.269	1.39829	122.6	2.23819	48.1869	171.431	1.40786	97.214	2.30101	39.1794	136.863	1.4223	165.582	2.35519	69.1324	235.508	1.3774	218.464	1.68291	81.337	300.912						1.39156	210.669	1.6189	81.4067	293.16	1.39416	188.184	1.61722	73.2853	262.359
1.42336	220.238	1.80346	91.8306	313.478	1.41313	101.514	2.08685	41.3412	143.452	1.40049	212.754	2.05486	83.966	297.959	1.38373	127.631	2.25996	48.2977	176.606	1.42217	93.6739	2.33275	39.0914	133.22	1.40628	172.442	2.38164	69.2357	242.502	1.40484	201.494	1.70233	80.5604	283.066						1.39632	207.588	1.63487	81.2313	289.859	1.41001	181.126	1.64091	73.3748	255.389
1.38644	242.351	1.82701	92.1019	336.006	1.40498	103.933	2.11027	41.4855	146.024	1.38735	106.891	2.12053	40.7921	148.296	1.38409	127.704	2.28767	48.3749	176.753	1.4058	97.9994	2.35921	39.2966	137.767	1.42263	166.295	2.41096	69.4908	236.576	1.41416	196.89	1.72531	80.5443	278.434						1.41477	197.728	1.65122	81.0194	279.739	1.40541	183.657	1.65829	73.589	258.114
1.39348	237.162	1.84748	91.8064	330.481	1.41939	99.9172	2.13267	41.322	141.821	1.38353	107.003	2.13775	40.4205	148.042	1.38325	128.46	2.3136	48.5388	177.692	1.42417	93.6253	2.38635	39.2602	133.339	1.40311	174.732	2.43725	69.6021	245.167	1.39484	209.676	1.7437	81.735	292.465						1.39509	208.85	1.66749	81.4649	291.364	1.42665	173.538	1.67597	73.2215	247.577
1.38245	246.185	1.8686	92.5798	340.338	1.40669	103.369	2.1551	41.4372	145.408	1.40302	101.378	2.15965	40.266	142.235	1.37847	130.123	2.34082	48.549	179.371	1.41424	96.1158	2.41276	39.3537	135.931	1.40181	175.743	2.4676	69.7756	246.358	1.39304	210.624	1.76664	81.716	293.407						1.39629	207.945	1.68408	81.3622	290.353	1.39997	186.668	1.69387	73.7692	261.329
1.37385	251.935	1.8891	92.5737	346.121	1.40207	104.984	2.17781	41.6	147.196	1.38543	106.276	2.17996	40.3456	147.237	1.40008	123.028	2.36682	48.5759	172.25	1.44252	90.1115	2.43828	39.4413	129.988	1.42183	167.339	2.49656	69.7898	237.928	1.37959	217.849	1.78606	81.5965	300.542						1.40104	205.778	1.70041	81.4878	288.304	1.42056	176.902	1.71492	73.5655	251.301
1.38366	246.027	1.91076	92.82	340.419	1.42152	99.6984	2.20014	41.4447	141.723	1.38313	107.144	2.20814	40.4228	148.194	1.39186	125.887	2.39474	48.6692	175.217	1.41325	97.0662	2.47085	39.641	137.179	1.40477	175.238	2.52298	70.0923	246.168	1.39857	101.108	1.8045	39.7951	141.406						1.40713	202.793	1.71701	81.5439	285.356	1.41189	181.196	1.73201	73.7753	255.83
1.37005	255.601	1.93036	92.9558	350.187	1.39411	107.334	2.22291	41.6752	149.635	1.39002	105.535	2.23382	40.5418	146.695	1.38736	128.13	2.42727	48.9353	177.762	1.40675	98.705	2.49394	39.6731	138.854	1.42625	166.274	2.55288	70.0845	237.148	1.40588	99.5871	1.82472	39.918	140.007						1.40042	205.803	1.73308	81.3726	288.211	1.39663	189.199	1.74964	74.1508	264.241
1.37237	254.371	1.95237	93.0901	349.09	1.42048	99.9533	2.24563	41.4465	141.982	1.39932	102.628	2.26403	40.3813	143.61	1.37961	131.187	2.45518	49.091	180.988	1.40857	98.6174	2.51869	39.8201	138.91	1.41218	172.526	2.58117	70.2881	243.639	1.39277	102.978	1.84987	39.9243	143.425						1.40281	205.825	1.7494	81.878	288.734	1.42208	176.51	1.76717	73.6654	251.012
1.39033	241.744	1.97407	92.8073	336.103	1.40727	103.632	2.26787	41.604	145.839	1.39687	103.647	2.2895	40.527	144.782	1.38953	127.82	2.48363	49.0991	177.61	1.3963	101.818	2.54334	39.8607	142.169	1.40795	174.471	2.60797	70.3456	245.648	1.39502	101.929	1.86816	39.7585	142.194						1.41352	200.024	1.76562	81.7082	282.739	1.40517	185.889	1.78581	74.4352	261.205
1.38434	246.739	1.9935	93.2788	341.57	1.41849	101.131	2.29034	41.7349	143.454	1.41463	99.1578	2.31299	40.5378	140.272	1.39091	127.555	2.50908	49.1795	177.418	1.41926	96.2423	2.57005	39.8881	136.593	1.41941	170.443	2.63893	70.6719	241.929	1.39628	102.999	1.91578	40.2939	143.815						1.40891	202.105	1.78213	81.6293	284.748	1.39418	190.8	1.80373	74.3092	266.009
1.37973	249.109	2.01474	93.002	343.703	1.41887	100.843	2.31306	41.6546	143.083	1.42035	97.7375	2.33764	40.5134	138.822	1.3847	130.003	2.53704	49.3133	180.015	1.43352	93.0683	2.59425	39.8969	133.416	1.41865	171.042	2.66525	70.7904	242.649	1.41233	97.9772	1.93499	39.9064	138.377						1.37836	220.402	1.79884	82.2828	303.794	1.4109	182.064	1.82137	73.9485	256.874
1.39445	239.523	2.03731	92.9482	334.002	1.4018	105.785	2.33557	41.8887	148.289	1.38577	106.931	2.36202	40.625	148.181	1.37794	132.924	2.56422	49.5172	183.162	1.41917	96.6938	2.61961	40.0635	137.225	1.41652	172.263	2.69144	70.9317	244.013	1.41373	97.8765	1.95356	40.0086	138.371						1.3973	209.954	1.81935	82.3371	293.37	1.40574	185.883	1.83908	74.5424	261.304
1.35614	267.284	2.06	93.4776	362.475	1.40139	105.922	2.35842	41.9021	148.438	1.4152	99.0483	2.39643	40.5441	140.173	1.38863	129.2	2.5922	49.5125	179.412	1.42113	95.8745	2.64251	39.9204	136.25	1.41119	174.656	2.71846	70.9828	246.473	1.38522	106.286	1.97324	40.4107	147.23						1.39022	214.053	1.83782	82.4368	297.582	1.41225	182.487	1.85692	74.3678	257.717
1.37665	252.699	2.08264	93.5649	347.878	1.40148	106.18	2.3814	42.0097	148.809	1.41072	100.235	2.42038	40.5834	141.405	1.39172	128.016	2.61865	49.4757	178.162	1.42195	95.6768	2.67126	39.9088	136.047	1.41127	175.333	2.74931	71.2768	247.443	1.37228	109.636	1.99291	40.2659	150.451						1.38494	217.912	1.85671	82.774	301.796	1.40843	184.17	1.8747	74.3464	259.389
1.36751	258.836	2.10415	93.4744	353.96	1.39663	107.687	2.40458	42.0831	150.399	1.42158	98.0606	2.45081	40.7594	139.401	1.38597	130.517	2.64574	49.6882	180.892	1.45422	89.2358	2.69644	40.1031	129.769	1.41468	173.955	2.78272	71.3079	246.091	1.38967	104.983	2.03546	40.3789	145.892						1.38378	218.718	1.8758	82.824	302.658	1.40939	184.816	1.89222	74.7918	260.477
1.37259	253.458	2.12649	92.8179	347.893	1.40243	106.382	2.42894	42.1829	149.193	1.43673	94.8867	2.47563	40.8759	136.327	1.38869	130.015	2.67276	49.8419	180.551	1.40522	100.666	2.72017	40.3056	141.458	1.40263	179.543	2.81025	71.4336	251.833	1.38508	105.505	2.05422	40.1053	146.133						1.40541	205.372	1.89385	82.2233	288.631	1.392	193.891	1.90968	75.0857	269.896
1.39768	237.727	2.14863	93.0221	332.267	1.39491	108.833	2.45313	42.3367	151.813	1.41246	100.868	2.5	41.0055	142.472	1.38662	130.809	2.70401	49.8631	181.383	1.40941	99.6929	2.74587	40.3356	140.508	1.41477	174.882	2.84148	71.7033	247.416	1.3887	104.248	2.08124	39.9928	144.77						1.40835	204.069	1.91133	82.3053	287.4	1.40187	189.098	1.92906	75.071	265.09
1.38077	250.645	2.16772	93.8475	346.085	1.39486	108.839	2.47599	42.3412	151.814	1.4103	101.974	2.52336	41.2361	143.813	1.38183	133.072	2.73054	50.0941	183.882	1.42257	96.7985	2.77122	40.4386	137.703	1.41753	174	2.86851	71.8218	246.65	1.39557	102.548	2.10195	40.0466	143.112						1.40335	207.292	1.92873	82.571	290.904	1.40162	189.189	1.94718	75.0697	265.171
1.36816	260.076	2.19059	94.0885	355.827	1.41799	102.236	2.4982	42.1397	144.969	1.40183	104.25	2.54815	41.2737	146.14	1.3803	134.015	2.76019	50.2481	184.981	1.40891	100.477	2.79515	40.6024	141.563	1.41887	173.73	2.8971	71.9414	246.5	1.38616	105.114	2.12196	40.0634	145.705						1.39952	210.492	1.94701	83.0302	294.588	1.38646	197.649	1.96585	75.4247	274.032
1.374	255.893	2.21197	94.076	351.596	1.41377	103.701	2.52025	42.3051	146.61	1.40183	104.61	2.57266	41.4195	146.645	1.38599	132.039	2.78773	50.2515	183.004	1.41947	97.6434	2.81887	40.4876	138.601	1.41302	176.368	2.92388	72.0016	249.211	1.37425	108.798	2.14215	40.172	149.516						1.40532	206.348	1.96452	82.5992	289.984	1.3932	194.246	1.9852	75.4683	270.623
1.40225	235.804	2.23476	93.3426	330.657	1.39603	109.175	2.54343	42.6004	152.411	1.40968	102.745	2.60071	41.4842	144.837	1.38695	131.929	2.81502	50.3591	182.978	1.4336	94.7466	2.84168	40.6306	135.829	1.41899	174.558	2.95543	72.3094	247.696	1.38927	104.33	2.16119	40.0925	144.942						1.40714	205.989	1.98263	82.8286	289.856	1.40334	189.299	2.00331	75.4612	265.651
1.40041	235.862	2.25859	92.9365	330.303	1.40302	107.049	2.56597	42.5205	150.192	1.41348	101.886	2.62377	41.5327	144.013	1.39526	129.229	2.84476	50.3783	180.309	1.41083	100.064	2.87292	40.6272	141.174	1.4193	174.933	2.98332	72.5187	248.283	1.3762	108.449	2.1804	40.2562	149.247						1.41249	203.093	2	82.7561	286.867	1.42114	180.549	2.02061	75.1755	256.585
1.3694	259.045	2.28083	94.0426	354.735	1.40937	105.139	2.58831	42.4271	148.18	1.39058	108.449	2.64811	41.7205	150.807	1.384	133.896	2.87045	50.6776	185.312	1.42017	98.0669	2.89755	40.7423	139.272	1.42066	174.53	3.01008	72.5866	247.948	1.37316	109.533	2.20266	40.3215	150.407						1.41304	203.035	2.01735	82.8365	286.896	1.38892	197.067	2.03858	75.6914	273.71
1.39409	241.973	2.3036	93.8138	337.331	1.40547	106.298	2.6115	42.4815	149.399	1.41323	102.402	2.67373	41.7145	144.718	1.38546	133.426	2.89342	50.7095	184.857	1.40462	102.223	2.92598	40.8683	143.583	1.41956	175.511	3.0365	72.8016	249.148	1.39183	103.737	2.22091	40.1338	144.385						1.4044	208.066	2.03527	83.0941	292.207	1.4024	190.396	2.05936	75.6945	267.012
1.37811	254.155	2.32424	94.4775	350.254	1.41651	103.278	2.63403	42.4161	146.295	1.39558	107.407	2.69782	41.8568	149.895	1.3847	133.794	2.91665	50.7467	185.264	1.43288	95.5131	2.95318	40.8897	136.858	1.41645	177.015	3.06404	72.8737	250.732	1.38349	106.293	2.24168	40.2274	147.055						1.41433	202.654	2.05429	82.9369	286.62	1.3954	194.028	2.07685	75.8034	270.746
1.38538	248.141	2.34638	94.049	343.77	1.40031	108.552	2.65713	42.8179	152.006	1.40118	105.67	2.72147	41.7726	148.062	1.38347	134.841	2.94108	50.9785	186.548	1.39661	105.117	2.99983	41.1855	146.807	1.41057	180.129	3.09223	73.0974	254.084	1.39568	102.588	2.26049	40.0819	143.181						1.41184	204.636	2.0733	83.2487	288.914	1.40869	188.059	2.09441	75.9727	264.916
1.38742	247.613	2.36895	94.3498	343.545	1.40182	108.182	2.68027	42.8423	151.651	1.40017	106.623	2.74724	42.0366	149.29	1.37909	136.864	2.9714	51.129	188.748	1.41082	101.071	3.02568	41.037	142.592	1.41796	177.114	3.11989	73.1838	251.141	1.37253	109.652	2.28458	40.2935	150.502						1.41601	202.516	2.09165	83.2202	286.765	1.4249	179.609	2.11152	75.4685	255.925
1.38421	248.245	2.38944	93.8	343.625	1.39956	109.348	2.70351	43.0474	153.04	1.40924	103.998	2.77134	41.9487	146.558	1.40109	128.95	2.99594	51.012	180.671	1.42128	98.9374	3.0503	41.2028	140.618	1.40783	181.924	3.1493	73.3243	256.117	1.39197	103.676	2.30502	40.1272	144.315						1.41117	205.639	2.10934	83.5168	290.192	1.40963	187.777	2.12933	76.0306	264.695
1.3735	257.604	2.41143	94.5736	353.82	1.41639	104.12	2.72616	42.7494	147.475	1.40836	104.367	2.79461	42.0065	146.986	1.39138	132.508	3.02048	51.126	184.369	1.41027	101.922	3.07327	41.3269	143.738	1.4095	181.535	3.17761	73.4755	255.873	1.38169	107.083	2.32611	40.3334	147.956						1.39985	212.299	2.1274	83.8132	297.186	1.40529	189.521	2.14681	75.9149	266.332
1.36875	261.511	2.43213	94.7673	357.943	1.42347	102.493	2.7486	42.8071	145.895	1.40614	105.283	2.81729	42.1457	148.043	1.39345	131.888	3.04451	51.1747	183.779	1.41361	101.229	3.0958	41.3984	143.098	1.42281	176.534	3.20486	73.8018	251.175	1.39043	104.2	2.34464	40.164	144.882						1.42899	197.354	2.16591	83.6644	282.017	1.4042	191.155	2.16487	76.3642	268.42
1.39044	244.619	2.45514	93.9485	340.128	1.39437	111.162	2.77142	43.1923	155.002	1.39247	109.19	2.83997	42.2158	152.043	1.38504	135.437	3.07078	51.4035	187.586	1.40597	103.124	3.11876	41.3786	144.99	1.41962	178.121	3.23296	73.8963	252.864	1.38093	107.312	2.36581	40.338	148.191						1.42802	198.112	2.1837	83.7985	282.908	1.39674	194.728	2.18342	76.335	271.984
1.3784	253.89	2.4765	94.4526	349.961	1.41508	105.019	2.7939	42.9822	148.611	1.38794	110.816	2.86395	42.3384	153.806	1.38258	136.781	3.0968	51.5771	189.111	1.41503	101.005	3.14311	41.446	142.925	1.42922	174.914	3.26252	74.2455	249.992	1.3771	108.918	2.38724	40.5248	149.991						1.41895	202.387	2.20104	83.7781	287.177	1.39631	195.17	2.20171	76.4384	272.519
1.37627	257.053	2.49813	95.0806	353.774	1.41493	105.056	2.81648	42.9832	148.647	1.4076	105.166	2.88901	42.2545	148.032	1.3814	137.539	3.12419	51.693	189.997	1.42894	97.8284	3.1672	41.4957	139.791	1.42232	178.398	3.28595	74.4907	253.738	1.37431	109.798	2.40655	40.5492	150.896						1.41479	205.05	2.21871	84.0149	290.102	1.39131	198.273	2.21954	76.6582	275.859
1.38152	253.182	2.52372	94.9783	349.777	1.39327	112.1	2.84004	43.427	156.186	1.4014	107.016	2.91343	42.3275	149.972	1.38458	136.522	3.15025	51.7495	189.025	1.40579	103.822	3.18996	41.6383	145.952	1.42516	177.443	3.31325	74.593	252.884	1.38962	105.139	2.42636	40.4448	146.103						1.40099	212.589	2.23657	84.1648	297.834	1.39924	194.063	2.23936	76.5424	271.541
1.38237	251.602	2.54429	94.6089	347.806	1.4187	104.281	2.86208	43.0542	147.944	1.40744	105.732	2.93706	42.4578	148.811	1.38936	134.927	3.17404	51.804	187.461	1.42237	99.8769	3.21588	41.7067	142.062	1.41527	182.085	3.33739	74.7475	257.699	1.37198	110.628	2.44663	40.5963	151.779						1.4188	202.97	2.25364	83.9906	287.973	1.39772	194.691	2.25731	76.5202	272.124
1.375	258.701	2.56455	95.3665	355.714	1.40471	108.763	2.88741	43.3735	152.78	1.39732	108.624	2.96083	42.5225	151.782	1.39035	135.092	3.2004	51.9818	187.824	1.40504	104.392	3.2388	41.7816	146.675	1.43168	175.313	3.36769	74.8457	250.992	1.35613	115.966	2.46928	40.7137	157.265						1.41082	207.197	2.27085	84.0814	292.317	1.39524	196.442	2.27543	76.7236	274.085
1.37626	257.698	2.58606	95.3212	354.658	1.40151	109.854	2.91092	43.4644	153.962	1.39976	107.833	2.98462	42.4755	150.941	1.3869	136.383	3.224	52.0205	189.15	1.41917	100.833	3.26617	41.7829	143.099	1.42629	178.145	3.39081	75.0934	254.086	1.37106	111.003	2.48853	40.6364	152.192						1.40502	211.225	2.28918	84.4912	296.777	1.39092	198.666	2.29364	76.7204	276.329
1.37719	257.78	2.61224	95.5837	355.011	1.41521	106.082	2.93348	43.4314	150.128	1.38723	111.893	3.0098	42.6714	155.221	1.37989	139.53	3.24773	52.2507	192.535	1.40586	104.439	3.28901	41.8944	146.826	1.43628	174.024	3.41424	75.0946	249.947	1.37477	110.054	2.51113	40.6934	151.299						1.40087	214.58	2.30786	84.9256	300.598	1.39117	199.115	2.31332	76.9305	277.003
1.3724	261.762	2.63445	95.8212	359.243	1.40137	110.351	2.95675	43.6435	154.643	1.39786	109.157	3.03577	42.7899	152.587	1.38383	138.011	3.27434	52.2134	190.983	1.4156	101.871	3.31395	41.8525	144.208	1.42106	181.073	3.43734	75.3826	257.316	1.38313	107.334	2.5306	40.5875	148.457						1.39446	218.212	2.32754	84.9678	304.288	1.41469	186.312	2.3308	76.3903	263.573
1.38518	124.599	2.67467	47.2084	172.593	1.40871	108.255	2.97994	43.6178	152.5	1.39067	111.304	3.06027	42.8307	154.788	1.38859	136.545	3.29967	52.3014	189.605	1.41247	103.025	3.33895	42.0029	145.52	1.41483	184.022	3.46179	75.4583	260.36	1.38177	108.038	2.55051	40.7051	149.284						1.41289	206.591	2.34423	84.2717	291.89	1.40233	192.947	2.3489	76.7322	270.576
1.38436	125.2	2.69495	47.3337	173.322	1.39427	112.872	3.00344	43.8377	157.373	1.40364	107.643	3.08564	42.8268	151.091	1.39073	135.943	3.32853	52.3651	189.06	1.41409	102.787	3.36299	42.0716	145.351	1.41756	182.855	3.48692	75.4827	259.208	1.37751	109.545	2.57081	40.8063	150.9						1.42599	200.588	2.3604	84.4388	286.037	1.38334	203.718	2.36697	77.1448	281.812
1.39381	122.005	2.7147	47.2748	170.052	1.38537	115.72	3.02621	43.9229	160.315	1.3977	109.666	3.11021	42.9713	153.28	1.39181	135.938	3.35569	52.507	189.2	1.41902	101.628	3.3868	42.1002	144.213	1.42204	180.27	3.51141	75.2193	256.35	1.37272	111.162	2.5913	40.8773	152.594						1.38396	225.744	2.37781	85.5355	312.421	1.40009	194.975	2.38495	77.0918	272.983
1.38516	124.888	2.73352	47.3183	172.99	1.40327	110.224	3.04891	43.8091	154.674	1.39111	111.526	3.13438	42.9647	155.145	1.38435	139.168	3.38198	52.7189	192.656	1.42287	100.95	3.41052	42.2072	143.638	1.43294	175.227	3.53572	75.0307	251.09	1.37678	109.637	2.61063	40.7665	150.946						1.38749	223.82	2.39486	85.5977	310.548	1.39777	196.091	2.40319	77.0865	274.089
1.37522	128.859	2.75807	47.5299	177.21	1.40685	109.475	3.07049	43.9028	154.016	1.39391	111.148	3.16027	43.1291	154.931	1.40428	132.005	3.40838	52.6393	185.371	1.4284	99.5257	3.43301	42.173	142.162	1.4114	184.835	3.59075	75.1581	260.876	1.38203	108.246	2.63172	40.8107	149.6						1.39578	218.89	2.4124	85.5237	305.522	1.38475	203.702	2.42225	77.3998	282.077
1.3721	130.169	2.7844	47.6059	178.605	1.40872	109.144	3.09267	43.9782	153.754	1.40844	106.685	3.18284	42.9538	150.259	1.38113	141.148	3.43463	53.0244	194.943	1.41929	102.085	3.45626	42.3168	144.888	1.42682	177.471	3.61859	74.9059	253.219	1.37385	110.969	2.65185	40.9334	152.455						1.42058	203.735	2.42981	84.6602	289.421	1.40462	192.862	2.44033	77.1387	270.897
1.39121	123.35	2.80496	47.4718	171.606	1.41178	108.128	3.11532	43.8985	152.653	1.39246	111.814	3.20699	43.2276	155.696	1.38557	139.371	3.45939	52.9746	193.108	1.42505	100.451	3.4789	42.2255	143.148	1.41902	181.951	3.64942	75.3746	258.192	1.38175	108.392	2.67043	40.8432	149.771						1.39939	215.511	2.44689	84.9985	301.584	1.41764	185.882	2.45831	76.7674	263.515
1.38639	124.864	2.82447	47.4561	173.11	1.41159	108.826	3.13752	44.1605	153.618	1.40835	107.137	3.23149	43.1218	150.886	1.38328	140.677	3.48379	53.1638	194.597	1.41176	104.248	3.50529	42.438	147.173	1.42302	180.146	3.6758	75.3467	256.351	1.38424	108.045	2.69273	40.9721	149.56						1.39607	217.471	2.46223	85.0414	303.605	1.40155	195.321	2.47631	77.524	273.752
1.38882	124.043	2.84424	47.4513	172.273	1.405	110.075	3.15986	43.943	154.656	1.40729	107.816	3.25407	43.2905	151.728	1.3906	138.141	3.51167	53.1929	192.1	1.42163	101.915	3.53133	42.4903	144.885	1.3998	190.661	3.70219	75.3212	266.888	1.37731	110.526	2.71578	41.1476	152.228						1.38628	223.834	2.48079	85.324	310.295	1.39875	196.67	2.49464	77.5076	275.092
1.38118	126.925	2.86423	47.5806	175.307	1.40307	111.493	3.18503	44.2967	156.432	1.4028	109.063	3.27859	43.2915	152.993	1.38217	141.813	3.54021	53.4164	196.01	1.42056	102.152	3.55366	42.4868	145.113	1.40679	188.093	3.72682	75.6204	264.607	1.37749	110.309	2.73839	41.0884	151.95						1.38166	226.81	2.49868	85.4125	313.376	1.39648	198.398	2.51233	77.7402	277.058
1.39648	121.936	2.88487	47.5765	170.281	1.40435	111.388	3.20846	44.3878	156.427	1.39596	111.308	3.30117	43.4299	155.382	1.38968	139.202	3.56653	53.4744	193.446	1.41366	104.058	3.57587	42.5591	147.102	1.39538	192.874	3.75819	75.3316	269.132	1.38324	108.463	2.76188	41.0236	150.031						1.39086	221.381	2.51537	85.4265	307.909	1.39367	199.885	2.53009	77.7577	278.574
1.38077	127.387	2.90635	47.6943	175.892	1.40063	112.859	3.23135	44.5617	158.073	1.39424	111.723	3.32423	43.3984	155.768	1.38208	142.397	3.59297	53.6202	196.804	1.41751	103.277	3.59942	42.624	146.397	1.40834	187.674	3.82853	75.7403	264.309	1.38044	109.011	2.78269	40.927	150.483						1.38974	220.705	2.53282	84.9088	306.722	1.40906	191.851	2.54746	77.5848	270.33
1.4163	116.11	2.92971	47.5977	164.447	1.38829	116.33	3.25377	44.4968	161.501	1.40679	108.386	3.34831	43.4571	152.476	1.38704	140.614	3.62265	53.6445	195.037	1.4063	106.359	3.62335	42.7142	149.573	1.40248	190.113	3.84945	75.6128	266.629	1.37018	112.777	2.80489	41.1824	154.525						1.38088	227.329	2.55487	85.4225	313.914	1.40127	196.448	2.5652	77.9189	275.277
1.38014	128.026	2.95108	47.8593	176.695	1.40779	110.989	3.27786	44.6204	156.249	1.42076	104.589	3.37244	43.396	148.596	1.37561	146.01	3.65157	54.035	200.853	1.40804	106.202	3.64943	42.8262	149.537	1.40644	189.268	3.87179	76.0242	266.195	1.38863	106.818	2.82351	40.989	148.33						1.38486	224.757	2.57062	85.375	311.256	1.39866	198.012	2.58288	78.0175	276.951
1.37954	128.407	2.96971	47.9288	177.142	1.40051	113.258	3.30006	44.7049	158.619	1.40173	110.241	3.3966	43.6429	154.527	1.39299	139.232	3.68085	53.9492	193.95	1.4058	107.057	3.67408	42.9353	150.501	1.39718	192.509	3.90061	75.5374	268.97	1.37246	112.075	2.8445	41.1839	153.819						1.38948	220.203	2.5855	84.6705	305.968	1.39429	200.59	2.60124	78.1556	279.68
1.38687	125.947	2.99203	47.9245	174.672	1.40276	112.88	3.32287	44.8077	158.344	1.39188	113.354	3.4199	43.7579	157.775	1.38965	140.636	3.70406	54.0381	195.435	1.41152	105.599	3.69965	42.9688	149.055	1.39744	193.585	3.92778	76.0183	270.524	1.38865	107.272	2.86736	41.1534	148.964						1.39048	218.963	2.5998	84.4092	304.463	1.39974	197.598	2.61929	78.0659	276.586
1.38991	124.632	3.01125	47.8125	173.227	1.39817	114.333	3.34553	44.865	159.857	1.40762	108.932	3.44324	43.768	153.335	1.38651	142.005	3.72822	54.117	196.891	1.41931	103.822	3.72449	43.0363	147.355	1.40548	189.134	3.95251	75.7881	265.825	1.36357	115.26	2.88605	41.3353	157.164						1.38387	224.395	2.61476	85.0192	310.534	1.4009	197.055	2.63714	78.0833	276.053
1.38012	128.286	3.03122	47.9585	177.051	1.40881	111.609	3.36848	44.9781	157.236	1.40001	111.044	3.46763	43.768	155.462	1.40355	136.037	3.75287	54.1616	190.935	1.41631	104.89	3.75239	43.1611	148.556	1.40548	189.478	3.98341	75.9211	266.307	1.37027	113.2	2.90665	41.3492	155.115						1.36478	236.781	2.62987	85.1829	323.154	1.39593	200.244	2.6551	78.3508	279.527
1.37234	131.513	3.0536	48.1338	180.481	1.40998	110.939	3.39052	44.8417	156.422	1.40841	108.865	3.4913	43.826	153.327	1.39335	140.146	3.77583	54.3664	195.272	1.4276	102.063	3.77594	43.1541	145.706	1.43807	175.172	4.01152	75.8939	251.91											1.39187	217.97	2.64943	84.2981	303.386	1.39138	202.505	2.6726	78.3159	281.761
1.37511	130.681	3.07458	48.1908	179.702	1.41414	109.752	3.41293	44.8166	155.205	1.39336	113.476	3.51546	43.9719	158.113	1.38368	144.292	3.79898	54.58	199.654	1.42445	102.82	3.79863	43.1597	146.463	1.42802	180.961	4.03562	76.5858	258.415											1.36811	233.595	2.66964	84.7983	319.585	1.40783	193.951	2.69024	78.1996	273.05
1.38771	125.893	3.09413	48.0155	174.703	1.40717	111.973	3.43495	44.9421	157.565	1.39482	112.904	3.53908	43.9183	157.48	1.38227	144.838	3.8227	54.5791	200.205	1.40792	107.541	3.82219	43.3515	151.409	1.41613	185.57	4.05962	76.3304	262.791											1.38242	225.738	2.68712	85.1866	312.064	1.39032	204.3	2.70806	78.7926	284.042
1.38561	126.709	3.11454	48.0635	175.569	1.40945	111.674	3.45686	45.0773	157.398	1.41471	107.054	3.56191	43.7796	151.451	1.38112	145.954	3.85044	54.8174	201.58	1.42056	104.344	3.84718	43.3848	148.227	1.43254	89.8584	4.12901	38.433	128.725											1.38496	223.661	2.70591	84.9571	309.761	1.39822	199.632	2.72597	78.5682	279.13
1.3792	129.08	3.13593	48.1299	178.027	1.39038	118.238	3.47994	45.4669	164.396	1.41152	108.239	3.58469	43.9179	152.781	1.39463	140.75	3.87438	54.7678	196.294	1.41346	106.177	3.87106	43.3923	150.077	1.43084	90.9086	4.17693	38.7241	130.076											1.37263	230.96	2.74622	84.883	317.022	1.39211	203.408	2.74384	78.8159	283.166
1.36919	132.922	3.15908	48.2284	181.995	1.39293	117.346	3.50328	45.4291	163.455	1.40898	108.701	3.60784	43.8196	153.157	1.39317	141.724	3.89684	54.9521	197.444	1.42864	102.682	3.89536	43.5212	146.696	1.40814	96.0339	4.20142	38.7262	135.229											1.40154	212.367	2.76572	84.1935	297.64	1.39853	200.163	2.76139	78.8473	279.935
1.38118	128.666	3.18248	48.2296	177.71	1.38832	119.047	3.52657	45.5379	165.275						1.37654	148.668	3.91904	55.1753	204.647	1.40325	109.395	3.91792	43.6024	153.51	1.41685	94.2488	4.22903	38.8264	133.536											1.3823	224.776	2.78415	84.792	310.707	1.38673	206.954	2.77911	79.0772	286.99
1.37753	130.201	3.20276	48.3376	179.356	1.40131	114.897	3.54906	45.4473	161.006						1.39605	141.052	3.94276	55.1057	196.914	1.42416	104.023	3.94442	43.6255	148.145	1.43436	90.3622	4.25381	38.8077	129.612											1.38544	221.637	2.80229	84.3047	307.065	1.41956	189.31	2.79679	78.5498	268.736
1.3891	125.758	3.22824	48.1319	174.69	1.394	117.653	3.5724	45.6678	164.009						1.40523	137.821	3.96493	55.1033	193.669	1.41915	105.282	3.96674	43.6414	149.411	1.41546	94.6765	4.27937	38.8731	134.011											1.3936	217.551	2.82216	84.515	303.178	1.39836	201.338	2.81466	79.267	281.542
1.38468	127.524	3.25135	48.2494	176.58	1.41723	110.285	3.59535	45.3762	156.298						1.39031	144.038	3.98701	55.4355	200.256	1.41266	107.343	3.99109	43.7818	151.639	1.42453	93.1554	4.31204	39.0956	132.702											1.39541	215.864	2.83817	84.2793	301.218	1.42399	187.578	2.83189	78.6595	267.11
1.38171	128.6	3.27135	48.2782	177.688	1.39608	116.948	3.61782	45.6467	163.269						1.40185	139.294	4.00937	55.2217	195.27	1.40838	108.405	4.01633	43.7503	152.676	1.42701	92.4879	4.33825	39.0448	131.981											1.37277	231.901	2.85491	85.2965	318.347	1.41385	192.842	2.84968	78.9122	272.65
1.38034	129.502	3.29706	48.4347	178.757	1.39757	117.014	3.63965	45.8451	163.535						1.38201	147.371	4.03112	55.4959	203.667	1.42369	104.925	4.04477	43.9537	149.38	1.41305	95.9849	4.36505	39.1814	135.632											1.38143	225.481	2.87338	84.8592	311.486	1.39768	202.068	2.86935	79.3879	282.426
1.39422	125.138	3.3171	48.5458	174.47	1.39817	116.837	3.66457	45.8491	163.358						1.37525	150.769	4.05574	55.7445	207.346	1.4084	108.816	4.0671	43.9383	153.257	1.42261	94.0389	4.39158	39.2857	133.781											1.36893	233.887	2.89037	85.1201	320.175	1.39119	205.864	2.8872	79.581	286.397
1.37972	129.8	3.34125	48.4642	179.087	1.39574	118.026	3.68936	46.0281	164.734						1.38444	147.153	4.08165	55.7777	203.724	1.39685	112.709	4.09154	44.1902	157.438	1.42218	94.1609	4.41689	39.2993	133.914											1.37362	230.695	2.90768	85.0248	316.886	1.3948	204.265	2.90539	79.6752	284.909
1.39079	126.201	3.36328	48.5185	175.52	1.41665	111.672	3.71161	45.8828	158.2						1.3849	147.012	4.10944	55.7798	203.596	1.41059	108.865	4.11827	44.193	153.564	1.41752	95.7337	4.4428	39.5074	135.704											1.39073	119.698	2.94905	46.1587	166.468	1.39076	206.65	2.92362	79.7752	287.402
1.39731	124.077	3.38653	48.5098	173.375	1.41471	112.344	3.73417	45.9395	158.934						1.39275	144.518	4.13781	55.9617	201.278	1.41477	107.7	4.14521	44.1712	152.371	1.41107	96.9595	4.47223	39.3876	136.816											1.39062	120.021	2.96892	46.2704	166.904	1.39753	202.815	2.94156	79.682	283.44
1.38489	128.8	3.41041	48.7557	178.374	1.40086	116.781	3.75633	46.1383	163.594						1.38311	148.808	4.16758	56.1908	205.818	1.4214	106.323	4.17574	44.2969	151.128	1.4228	94.2284	4.49817	39.384	134.068											1.37567	124.582	2.98864	46.1679	171.384	1.40508	198.399	2.9587	79.4395	278.766
1.39372	125.741	3.43178	48.7125	175.247	1.40129	116.878	3.77882	46.2263	163.779						1.37597	152.341	4.19459	56.438	209.617	1.43003	104.197	4.19814	44.3276	149.006	1.40921	97.7565	4.52303	39.5324	137.76											1.39301	118.649	3.00665	46.0308	165.28	1.39469	204.946	2.97672	79.9467	285.837
1.37568	132.181	3.45108	48.8273	181.839	1.39547	119.25	3.80165	46.4732	166.409						1.37822	151.378	4.22076	56.4203	208.633	1.41118	109.368	4.221	44.4534	154.338	1.41334	96.9945	4.54782	39.6236	137.087											1.36744	127.866	3.02647	46.3335	174.849	1.40916	196.985	2.99452	79.6824	277.583
1.37484	132.933	3.47178	48.9854	182.761	1.40211	117.021	3.82406	46.3814	164.076						1.38957	146.481	4.24554	56.2705	203.545	1.40443	111.48	4.24634	44.5578	156.566	1.42743	93.5726	4.57057	39.5452	133.568											1.39426	118.798	3.04645	46.233	165.635	1.41069	196.832	3.01195	79.9262	277.669
1.37914	131.374	3.49344	48.9812	181.184	1.39619	119.241	3.84704	46.548	166.484						1.38985	147.095	4.27037	56.5585	204.441	1.42047	107.35	4.27418	44.6254	152.487	1.41192	97.604	4.59753	39.7321	137.809											1.39015	120.271	3.06562	46.3154	167.195	1.39997	202.678	3.02954	80.1278	283.742
1.3813	130.336	3.51468	48.8731	180.034	1.39418	119.931	3.87025	46.5769	167.205						1.39038	148.584	4.41742	57.2102	206.588	1.41346	109.087	4.29805	44.5815	154.19	1.40938	98.7335	4.64918	39.941	139.153											1.40525	115.226	3.08294	46.1229	161.921	1.39472	205.99	3.04771	80.3569	287.299
1.37825	131.536	3.53721	48.923	181.29	1.4049	115.923	3.89217	46.2665	162.86						1.37829	153.705	4.42831	57.3456	211.849	1.40638	111.265	4.32408	44.6968	156.481	1.42113	95.8489	4.67505	39.9024	136.214											1.39253	119.586	3.10169	46.3361	166.527	1.40315	200.958	3.0652	80.0804	281.973
1.38391	129.908	3.55743	49.0589	179.781	1.38607	122.896	3.91957	46.7427	170.343						1.3887	149.621	4.4448	57.3563	207.779	1.4155	109.077	4.34711	44.8194	154.399	1.41431	97.7125	4.70062	40.0112	138.195											1.37975	123.853	3.12004	46.4078	170.885	1.39158	208.473	3.08288	80.6713	290.107
1.37455	133.567	3.57799	49.1843	183.594	1.38607	123.538	3.94631	46.9739	171.233						1.38091	152.991	4.45885	57.4578	211.266	1.41637	108.884	4.37185	44.8152	154.219	1.42237	95.9223	4.74944	40.0525	136.437											1.38618	121.777	3.13858	46.4099	168.804	1.39755	205.251	3.10034	80.6481	286.848
1.37809	132.372	3.6011	49.2053	182.42	1.41035	115.42	3.96871	46.6993	162.783						1.37816	154.73	4.48259	57.6832	213.243	1.4139	109.988	4.39601	45.0016	155.512	1.40716	100.018	4.77553	40.2393	140.74											1.39489	119.09	3.15693	46.4231	166.117	1.39633	206.543	3.11799	80.9001	288.402
1.37063	135.381	3.62061	49.3313	185.558	1.39107	122.034	3.99171	47.0162	169.757						1.38512	152.144	4.50749	57.7563	210.737	1.41952	108.762	4.41853	45.1198	154.389	1.43068	94.3282	4.80113	40.172	134.954											1.38941	120.319	3.17473	46.2544	167.172	1.39632	206.547	3.13533	80.9019	288.405
1.3854	130.034	3.64178	49.2898	180.149	1.39284	121.751	4.01413	47.1304	169.579						1.39491	148.293	4.53011	57.7576	206.855	1.41225	110.553	4.44099	45.0626	156.128	1.4197	97.1695	4.82546	40.3151	137.951											1.4016	116.227	3.19305	46.0933	162.903	1.39394	208.514	3.15364	81.1761	290.656
1.38294	130.927	3.66315	49.3069	181.064	1.40279	118.598	4.03836	47.0736	166.368						1.38624	151.669	4.55218	57.7691	210.25	1.4	114.317	4.46463	45.1837	160.044	1.4137	98.73	4.85068	40.3696	139.575											1.3876	121.632	3.21167	46.5338	168.777	1.39406	208.815	3.17144	81.318	291.1
1.38589	129.924	3.68292	49.3206	180.061	1.41309	115.228	4.06055	46.9351	162.827						1.39176	150.021	4.5749	57.9734	208.794	1.42082	108.689	4.49222	45.2312	154.428	1.43409	94.2696	4.87615	40.4673	135.191											1.34695	136.339	3.23785	46.6069	183.642	1.40818	201.241	3.18937	81.2165	283.382
1.37121	135.535	3.70271	49.4608	185.847	1.41262	115.741	4.08286	47.0915	163.499						1.38378	153.741	4.59698	58.1797	212.744	1.42357	108.128	4.51487	45.2923	153.928	1.40986	100.151	4.89982	40.5668	141.2											1.37967	122.956	3.25652	46.0625	169.639	1.42369	193.181	3.20659	80.9549	275.029
1.37424	134.456	3.72251	49.4734	184.775	1.41002	116.647	4.10513	47.1561	164.475						1.37553	157.584	4.62055	58.3221	216.762	1.43598	104.974	4.53735	45.2791	150.741	1.40791	100.611	4.92545	40.5575	141.652											1.37045	126.314	3.27468	46.1542	173.107	1.40986	201.081	3.2257	81.4567	283.496
1.38005	132.268	3.74453	49.4356	182.538	1.39741	121.008	4.12999	47.3786	169.098						1.38426	154.284	4.646	58.4431	213.569	1.40394	114.318	4.56345	45.6315	160.495	1.39509	104.81	4.97458	40.9038	146.22											1.39993	115.815	3.29261	45.7403	162.133	1.41906	196.61	3.24354	81.4866	279.002
1.37088	136.204	3.76697	49.6536	186.719	1.39492	121.979	4.1529	47.4719	170.151						1.38673	153.174	4.6694	58.3963	212.41	1.40505	113.883	4.59284	45.5903	160.011	1.41556	99.3172	5.00092	40.7929	140.589											1.37672	123.953	3.31127	46.068	170.648	1.42364	194	3.26138	81.2876	276.185
1.37777	133.49	3.78878	49.5861	183.918	1.41105	117.11	4.17526	47.4636	165.249						1.39097	151.658	4.69654	58.4845	210.952	1.42651	108.123	4.61744	45.6011	154.239	1.40317	102.731	5.02619	40.9235	144.149											1.37905	123.493	3.32985	46.1847	170.302	1.43293	189.742	3.27948	81.2733	271.888
1.381	132.714	3.80983	49.7251	183.278	1.41027	116.976	4.19725	47.3168	164.968						1.39521	150.116	4.71946	58.5265	209.444	1.40442	114.084	4.64055	45.5939	160.221	1.42508	97.0197	5.05183	40.7733	138.261											1.38174	122.663	3.34853	46.2057	169.488	1.42235	195.12	3.29714	81.5067	277.529
1.38807	129.717	3.83096	49.5171	180.057	1.40127	120.862	4.22669	47.8038	169.361						1.39151	152.166	4.74113	58.7544	211.741	1.40833	113.415	4.66577	45.7701	159.726	1.42084	98.659	5.07749	41.0436	140.179											1.4086	113.831	3.36652	45.9434	160.342	1.42515	193.86	3.31516	81.5245	276.28
1.37799	133.959	3.85031	49.7938	184.594	1.40192	120.778	4.2493	47.8469	169.32						1.38352	155.443	4.76403	58.7765	215.059	1.42594	108.959	4.69381	45.8867	155.369	1.4003	104.449	5.10891	41.3066	146.261											1.38771	120.946	3.38541	46.2793	167.837	1.42043	197.228	3.33391	81.9935	280.148
1.3684	137.886	3.87065	49.928	188.684	1.39985	121.723	4.27205	47.9682	170.394						1.39652	150.762	4.7895	58.9781	210.542	1.41174	112.765	4.71607	45.91	159.195	1.41719	99.9097	5.13424	41.1994	141.591											1.3885	120.781	3.40364	46.3121	167.704	1.41166	202.224	3.35159	82.3131	285.471
1.37764	134.408	3.88958	49.916	185.166	1.40573	119.897	4.29463	47.9538	168.543						1.38427	155.926	4.81167	59.0825	215.843	1.40952	113.711	4.74479	46.0425	160.278	1.41912	99.8445	5.15873	41.3681	141.692											1.40085	116.188	3.42033	45.9936	162.762	1.40718	205.107	3.37014	82.5382	288.622
1.37366	135.895	3.91169	49.9203	186.675	1.41058	118.268	4.31625	47.8713	166.826						1.39634	151.023	4.83568	59.0401	210.88	1.42013	111.052	4.76858	46.1486	157.709	1.39246	106.746	5.1887	41.3762	148.639											1.37557	125.361	3.43978	46.4471	172.443	1.41549	200.574	3.38802	82.4095	283.91
1.38242	132.812	3.9306	49.9567	183.602	1.39357	124.498	4.33918	48.2702	173.497						1.38744	155.226	4.85841	59.3021	215.368	1.4158	112.43	4.79137	46.2275	159.179	1.40406	104.208	5.23939	41.6034	146.315											1.38533	121.418	3.45818	46.1798	168.203	1.41795	199.99	3.40595	82.6644	283.575
1.37669	135.361	3.95349	50.1337	186.351	1.3885	126.317	4.36261	48.3344	175.392						1.37733	160.105	4.88226	59.5425	220.518	1.42127	111.251	4.81399	46.3487	158.118	1.41014	102.564	5.26557	41.5716	144.63																1.41561	201.718	3.4269	82.8698	285.554
1.37846	134.288	3.97369	49.9781	185.111	1.39627	123.883	4.38502	48.3801	172.974						1.39417	152.967	4.90701	59.4899	213.262	1.41624	112.63	4.83624	46.3594	159.511	1.40898	102.999	5.29072	41.6302	145.124																1.43524	191.401	3.44461	82.4217	274.706
1.37565	135.867	3.99524	50.1796	186.905	1.38165	129.255	4.40836	48.5738	178.586						1.38532	156.767	4.92962	59.5714	217.172	1.41151	114.077	4.85918	46.4179	161.021	1.40939	103.384	5.32174	41.8258	145.708																1.43092	193.505	3.46258	82.4912	276.89
1.39315	129.273	4.01541	50.0059	180.097	1.39695	124.212	4.43337	48.5861	173.517						1.38251	158.983	4.95754	59.9439	219.795	1.41551	113.364	4.885	46.5626	160.467	1.42464	99.5853	5.34775	41.8108	141.874																1.40093	210.144	3.48083	83.2669	294.396
1.38313	133.068	4.03652	50.1371	184.05	1.38224	129.427	4.45597	48.729	178.899						1.38119	159.329	4.98139	59.8684	220.063	1.42904	109.596	4.90892	46.5016	156.617	1.41456	102.293	5.37302	41.914	144.7																1.39772	212.534	3.49943	83.5401	297.063
1.36869	139.04	4.05688	50.3882	190.303	1.39488	125.059	4.48137	48.6535	174.442						1.3814	159.767	5.00549	60.0921	220.702	1.41292	114.392	4.93253	46.6911	161.627	1.44369	95.1829	5.39537	41.7749	137.414																1.41152	204.32	3.51735	83.1412	288.402
1.38359	133.147	4.08029	50.2305	184.221	1.39324	125.72	4.50438	48.7031	175.158						1.38581	156.944	5.02913	59.7224	217.494	1.42201	111.902	4.95668	46.6905	159.126	1.42045	101.111	5.42039	42.0268	143.623																1.42125	197.942	3.5356	82.4498	281.325
1.36808	139.273	4.10118	50.3821	190.537	1.39223	126.27	4.5269	48.8025	175.796						1.38481	157.889	5.05201	59.9145	218.646	1.41604	113.969	4.98071	46.8722	161.385	1.42359	100.312	5.44303	42.0098	142.803																1.43078	194.02	3.55313	82.6853	277.599
1.37647	136.083	4.12211	50.3691	187.314	1.38899	127.784	4.55046	48.961	177.491						1.38496	158.025	5.07531	59.974	218.858	1.41221	115.035	5.00309	46.8837	162.454	1.41273	103.547	5.4742	42.2379	146.284																1.43068	193.42	3.5706	82.4117	276.723
1.3665	140.353	4.14173	50.5602	191.793	1.40323	122.819	4.57249	48.8213	172.343						1.38388	158.628	5.09717	60.0502	219.522	1.40747	116.487	5.02657	46.9194	163.953	1.40875	104.733	5.49964	42.3036	147.542																1.43166	193.09	3.58834	82.4547	276.438
1.38275	133.978	4.1635	50.432	185.259	1.4053	122.273	4.59569	48.8556	171.831						1.38868	156.623	5.12009	60.0492	217.499	1.41364	114.727	5.05047	46.9189	162.183	1.42708	99.6811	5.52206	42.0926	142.253																1.39807	210.651	3.60617	82.871	294.505
1.37356	137.699	4.18505	50.5675	189.138	1.39613	125.875	4.61828	49.1435	175.738						1.38769	157.638	5.1445	60.2564	218.753	1.42542	111.555	5.07682	46.9418	159.013	1.39842	108.249	5.55125	42.6053	151.377																1.39376	213.672	3.62475	83.1366	297.807
1.37361	138.117	4.20968	50.7265	189.72	1.39289	127.101	4.64062	49.2104	177.037						1.38161	161.072	5.16988	60.5862	222.538	1.42466	112.233	5.09939	47.1384	159.894	1.44304	96.221	5.57369	42.1691	138.85																1.39387	213.63	3.64345	83.1593	297.772
1.37917	135.37	4.22897	50.4801	186.698	1.39589	126.323	4.66362	49.2807	176.334						1.37909	162.204	5.19286	60.6349	223.694	1.41579	114.656	5.12207	47.1395	162.329	1.40857	104.918	5.59652	42.3641	147.784																1.41843	199.774	3.65992	82.6594	283.365
1.3779	136.346	4.25079	50.6652	187.872	1.41057	121.069	4.68586	49.0144	170.776						1.38758	159.1	5.21614	60.8217	220.763	1.40675	117.768	5.15162	47.3416	165.669	1.41043	105.379	5.62419	42.7436	148.63																1.40236	208.19	3.6795	82.7748	291.958
1.37505	137.795	4.27026	50.8161	189.475	1.40088	124.71	4.70781	49.2798	174.703						1.38489	160.503	5.2396	60.9043	222.28	1.41732	114.831	5.17536	47.3948	162.752	1.41444	104.364	5.65307	42.7497	147.617																1.38852	216.798	3.69673	83.2258	301.029
1.37515	137.604	4.2942	50.751	189.227	1.41252	121.02	4.73041	49.2302	170.944						1.37991	163.08	5.26414	61.0688	225.036	1.40642	118.178	5.19813	47.4815	166.209	1.42723	101.17	5.67848	42.7348	144.392																1.3869	217.782	3.71459	83.2608	302.042
1.37361	138.48	4.31326	50.8716	190.217	1.39376	128.054	4.75245	49.6894	178.476						1.38255	161.964	5.28685	61.0991	223.922	1.41253	116.55	5.22282	47.5446	164.63	1.4207	103.021	5.70365	42.845	146.362																1.39749	211.36	3.73585	83.0013	295.374
1.3688	140.509	4.33507	50.934	192.328	1.39393	127.698	4.77513	49.5679	178.002						1.39139	158.64	5.31404	61.2324	220.73	1.431	111.789	5.248	47.6519	159.97	1.40582	107.12	5.72977	42.9554	150.591																1.38908	217.27	3.75777	83.4952	301.805
1.36964	140.472	4.35524	51.0351	192.395	1.39473	127.756	4.79826	49.6915	178.184						1.3782	164.918	5.33663	61.4986	227.289	1.41314	116.761	5.27094	47.6853	164.999	1.403	108.086	5.75463	43.0369	151.646																1.3808	222.646	3.77748	83.723	307.429
1.3661	142.024	4.37469	51.1042	194.018	1.40529	124.389	4.8206	49.7009	174.802						1.39259	158.395	5.36088	61.3326	220.58	1.43101	112.058	5.29456	47.7745	160.356	1.42081	103.584	5.77985	43.0904	147.173																1.3807	221.847	3.79512	83.4305	306.304
1.37972	136.531	4.39456	50.9928	188.374	1.39667	127.263	4.84333	49.7527	177.745						1.38702	161.436	5.38438	61.6202	223.915	1.40229	120.544	5.31821	47.9187	169.038	1.41618	105.065	5.80466	43.2211	148.791																1.39195	215.547	3.81363	83.4708	300.03
1.36635	142.01	4.41553	51.127	194.035	1.39517	128.237	4.86542	49.9417	178.913						1.38722	161.427	5.40743	61.6566	223.935	1.41261	118.055	5.34589	48.1493	166.766	1.43081	101.028	5.82675	43.0404	144.552																1.39709	211.755	3.83175	83.1141	295.841
1.36595	142.066	4.4361	51.0897	194.055	1.38326	132.868	4.888	50.1587	183.79						1.3899	160.867	5.4322	61.8449	223.588	1.41013	118.588	5.37405	48.067	167.225	1.40386	108.824	5.85154	43.4255	152.774																1.40392	207.728	3.85204	82.9294	291.635
1.37046	140.738	4.45573	51.2598	192.876	1.39595	128.444	4.91027	50.1207	179.301						1.38852	161.819	5.45506	62.0092	224.689	1.41242	118.023	5.39801	48.1341	166.698	1.40779	107.99	5.87689	43.5185	152.027																1.39629	213.17	3.87169	83.4755	297.647
1.37172	140.1	4.47661	51.1954	192.178	1.40946	123.445	4.93285	49.8371	173.99						1.38883	161.943	5.47735	62.1095	224.912	1.41433	117.834	5.42357	48.2627	166.656	1.41308	106.942	5.90619	43.6608	151.117																1.40264	208.271	3.88988	82.898	292.129
1.38021	136.911	4.49715	51.1935	188.966	1.40501	125.918	4.95534	50.278	176.916						1.39467	159.628	5.50078	62.1568	222.627	1.41125	118.943	5.44799	48.3615	167.858	1.40286	109.775	5.93614	43.6946	154																1.39386	214.685	3.90909	83.5355	299.241
1.36998	141.253	4.51967	51.3672	193.514	1.3917	130.368	4.97815	50.3119	181.434						1.39644	159.453	5.52374	62.3607	222.666	1.41252	118.585	5.47208	48.3755	167.503	1.39553	112.238	5.96108	43.8539	156.632																1.43419	192.973	3.9287	82.868	276.761
1.36848	141.999	4.539	51.4361	194.324	1.39418	129.768	5.00072	50.4109	180.92						1.38152	166.108	5.54814	62.4694	229.48	1.40644	120.566	5.49748	48.4345	169.569	1.40223	110.532	5.98545	43.9285	154.991																1.39722	212.811	3.94925	83.5159	297.344
1.36132	145.177	4.56012	51.5349	197.631	1.38542	133.219	5.02367	50.5826	184.565						1.39303	161.554	5.57122	62.635	225.05	1.42461	115.768	5.52267	48.6082	164.924	1.40909	108.458	6.01104	43.849	152.827																1.3982	212.357	3.96736	83.5703	296.918
1.373	140.315	4.58026	51.4636	192.653	1.39736	129.488	5.04714	50.6968	180.941						1.38244	166.045	5.59393	62.623	229.548	1.4129	119.315	5.54499	48.7173	168.581	1.41183	108.077	6.04565	43.9909	152.586																1.40978	98.6163	4.00565	39.9571	139.028
1.37056	141.666	4.60321	51.6008	194.161	1.39381	130.483	5.06987	50.6377	181.869						1.3792	168.027	5.61784	62.819	231.743	1.41925	117.558	5.56954	48.7506	166.845	1.42065	105.853	6.07204	44.0209	150.381																1.40531	100.28	4.02347	40.1846	140.925
1.38341	136.403	4.62348	51.4373	188.701	1.4034	127.546	5.09202	50.7209	178.999						1.38239	167.17	5.64068	63.0434	231.094	1.41157	120.19	5.59183	48.9161	169.658	1.40804	109.728	6.09713	44.2498	154.501																1.39112	103.665	4.04105	40.0674	144.21
1.36086	146.032	4.64358	51.7789	198.73	1.38976	132.478	5.11484	50.8766	184.112						1.38253	167.112	5.66266	63.1168	231.037	1.417	118.474	5.61495	48.8608	167.877	1.42786	104.694	6.12267	44.2928	149.488																1.37475	109.031	4.05915	40.3552	149.89
1.37302	140.765	4.66623	51.6203	193.273	1.40381	127.419	5.13709	50.7229	178.873						1.38304	167.565	5.68804	63.272	231.749	1.41004	121.071	5.64124	49.0748	170.715	1.40304	111.441	6.14933	44.3785	156.356																1.38323	106.486	4.07722	40.3197	147.295
1.37348	140.713	4.69329	51.6624	193.266	1.38924	132.982	5.15984	50.9993	184.744						1.38324	167.618	5.7129	63.3218	231.856	1.40615	122.315	5.66672	49.1065	171.994	1.42968	103.978	6.1721	44.1794	148.656																1.3768	108.578	4.0962	40.401	149.491
1.37627	139.762	4.71649	51.7077	192.351	1.38628	134.439	5.18226	51.1622	186.37						1.39719	161.513	5.73754	63.2724	225.665	1.4184	119.133	5.69072	49.2891	168.979	1.40831	110.259	6.19766	44.4906	155.279																1.40503	100.033	4.11282	40.0512	140.55
1.37203	141.949	4.73762	51.9145	194.759	1.39585	131.467	5.20455	51.2887	183.508						1.38852	166.034	5.76069	63.607	230.542	1.40522	123.109	5.71343	49.3169	172.995	1.39715	114.126	6.22509	44.7773	159.451																1.40674	100.263	4.13022	40.3215	141.043
1.36336	145.83	4.7579	52.0712	198.819	1.38593	135.019	5.22685	51.336	187.126						1.39553	163.329	5.78515	63.7117	227.93	1.40644	123.095	5.74028	49.4539	173.125	1.42366	106.8	6.25158	44.7336	152.048																1.38552	106.381	4.1489	40.5094	147.393
1.37247	141.755	4.77806	51.9072	194.554	1.40136	129.644	5.24897	51.2924	181.678						1.38291	168.906	5.8073	63.7851	233.582	1.41094	121.749	5.76987	49.4568	171.781	1.39386	115.118	6.27756	44.7878	160.459																1.38704	105.727	4.16619	40.4367	146.647
1.3654	144.966	4.80022	52.0567	197.937	1.38538	135.43	5.27116	51.4179	187.623						1.39208	165.379	5.8332	63.9429	230.222	1.4096	122.318	5.79381	49.5405	172.42	1.41073	110.449	6.30903	44.8348	155.813																1.41033	98.6187	4.18418	40.0119	139.085
1.37192	142.304	4.82108	52.0288	195.229	1.38843	134.664	5.29487	51.5349	186.971						1.38642	168.061	5.85548	64.0559	233.003	1.41012	122.59	5.81777	49.7162	172.867	1.40824	111.564	6.35675	45.0097	157.109																1.38853	105.643	4.20242	40.5592	146.689
1.37448	141.285	4.84213	52.0185	194.194	1.39751	131.8	5.31851	51.6392	184.192						1.38433	169.38	5.87936	64.1804	234.478	1.4099	122.793	5.84351	49.7725	173.126	1.39551	115.509	6.38141	45.1306	161.193																1.39557	103.613	4.22079	40.5095	144.599
1.36429	145.959	4.86559	52.2466	199.13	1.38645	135.899	5.34143	51.7293	188.417						1.38675	168.92	5.90528	64.4202	234.249	1.3977	127.126	5.86899	49.9558	177.683	1.4035	113.395	6.40864	45.2128	159.149																1.39084	104.726	4.23913	40.4496	145.657
1.37016	143.3	4.88632	52.1409	196.343	1.39413	133.637	5.36558	51.8963	186.308						1.39226	166.39	5.92755	64.3894	231.659	1.42016	120.093	5.89282	49.9027	170.551	1.4136	110.84	6.43627	45.3094	156.683																1.40254	101.995	4.25729	40.589	143.052
1.36857	144.339	4.91064	52.2835	197.537	1.41443	126.078	5.38725	51.5258	178.328						1.39062	167.229	5.95022	64.4435	232.553	1.42647	118.419	5.91607	49.9399	168.921	1.44324	102.736	6.45868	45.0455	148.272																1.38696	106.304	4.27548	40.6462	147.439
1.3733	142.07	4.93035	52.1504	195.105	1.38638	136.603	5.41034	51.9914	189.384						1.39258	166.989	5.97591	64.6812	232.546	1.40906	123.736	5.93933	50.0321	174.352	1.3926	117.137	6.48763	45.4248	163.124																1.39693	103.531	4.2941	40.6166	144.627
1.36638	145.312	4.95054	52.3241	198.552	1.39088	135.279	5.43323	52.0988	188.157						1.3884	169.116	5.99858	64.7902	234.8	1.40943	124.007	5.96367	50.1884	174.779	1.41619	110.673	6.51472	45.5316	156.733																1.39703	103.134	4.31219	40.474	144.082
1.3734	142.616	4.97361	52.3502	195.868	1.39546	133.841	5.45742	52.1421	186.769						1.3839	171.791	6.02057	65.0373	237.741	1.40422	126.062	5.98931	50.3713	177.019	1.41655	110.821	6.53988	45.6333	156.984																1.38217	107.83	4.33083	40.7161	149.04
1.37484	142.149	4.99778	52.3876	195.432	1.3922	135.346	5.48221	52.2856	188.428						1.38764	169.743	6.04321	64.8986	235.541	1.40347	126.401	6.0161	50.423	177.399	1.41253	112.25	6.56561	45.7696	158.557																1.39014	105.762	4.34902	40.7793	147.023
1.36777	145.061	5.01893	52.433	198.411	1.40356	131.101	5.50488	52.1519	184.009						1.39338	168.195	6.06796	65.2759	234.359	1.40733	125.436	6.04288	50.5207	176.53	1.41365	111.847	6.59056	45.7279	158.112																1.38815	106.379	4.36784	40.8041	147.671
1.36921	144.594	5.04047	52.4739	197.98	1.39197	135.805	5.52751	52.4503	189.037						1.38705	170.723	6.09062	65.177	236.8	1.40937	124.953	6.06684	50.5644	176.105	1.40033	116.283	6.61894	45.9911	162.834																1.41145	99.4323	4.38641	40.4551	140.344
1.3717	143.415	5.06438	52.401	196.723	1.3841	138.739	5.55063	52.4813	192.028						1.39222	169.013	6.11381	65.4022	235.303	1.41209	124.511	6.09123	50.7449	175.821	1.40053	115.829	6.64381	45.8387	162.221																1.40713	100.659	4.40453	40.5179	141.64
1.37539	142.227	5.08488	52.4981	195.618	1.38366	139.426	5.57788	52.6907	192.919						1.38633	171.706	6.13625	65.4314	238.042	1.43171	118.919	6.1166	50.7984	170.257	1.40727	114.53	6.67168	46.0948	161.175																1.38703	106.878	4.42372	40.8681	148.242
1.37869	140.96	5.10818	52.4937	194.341	1.38635	138.744	5.60112	52.7951	192.348						1.37865	175.985	6.16074	65.7074	242.621	1.42	122.274	6.13982	50.7807	173.629	1.41113	113.513	6.69703	46.1219	160.181																1.40125	102.569	4.44227	40.6878	143.725
1.36593	146.614	5.12862	52.7258	200.264	1.40506	131.625	5.62396	52.5567	184.941						1.38168	174.837	6.18493	65.8121	241.568	1.40594	127.048	6.16316	50.9955	178.622	1.39962	117.216	6.72375	46.2789	164.058																1.36662	113.5	4.46	41.0886	155.112
1.36596	146.573	5.14916	52.7186	200.213	1.37787	142.445	5.64755	52.991	196.271						1.39201	170.247	6.20835	65.8458	236.987	1.41305	124.918	6.19105	51.0291	176.515	1.40549	115.796	6.75013	46.3979	162.75																1.37862	109.862	4.47856	41.0929	151.458
1.3646	147.189	5.16948	52.7422	200.855	1.40947	130.266	5.67164	52.5949	183.607						1.39183	170.76	6.23121	66.0136	237.67	1.40706	127.165	6.21501	51.164	178.929	1.41086	114.351	6.77705	46.4339	161.334																1.38978	106.84	4.49932	41.1596	148.485
1.37574	142.906	5.19086	52.7937	196.601	1.38356	140.4	5.69484	53.0341	194.251						1.39047	171.716	6.25425	66.1309	238.766	1.42678	121.288	6.23894	51.2111	173.051	1.41267	113.83	6.80493	46.4275	160.804																1.38033	109.66	4.51734	41.2033	151.366
1.37683	142.575	5.21232	52.8317	196.302	1.38178	141.687	5.72211	53.2663	195.78						1.39003	172.205	6.27647	66.2576	239.371	1.41262	125.678	6.26137	51.2835	177.536	1.41042	114.872	6.83041	46.596	162.018																1.3967	104.666	4.53544	41.0393	146.187
1.36968	145.553	5.23234	52.8993	199.361	1.39148	138.249	5.74643	53.3266	192.37						1.37725	178.381	6.29911	66.3511	245.676	1.42335	122.865	6.28556	51.4334	174.881	1.41409	114.05	6.85828	46.677	161.276																1.38098	109.554	4.555	41.2197	151.292
1.37456	143.937	5.25397	53.0067	197.851	1.39137	138.647	5.76948	53.4636	192.91						1.38613	174.357	6.32249	66.406	241.681	1.41169	126.796	6.30855	51.6007	178.997	1.42886	109.544	6.8806	46.457	156.522																1.39661	105.21	4.57378	41.2458	146.937
1.37736	142.635	5.27369	52.935	196.46	1.38495	141.478	5.79237	53.6395	195.939						1.37849	178.85	6.34464	66.7489	246.543	1.41109	126.807	6.33344	51.5277	178.936	1.42463	110.54	6.90238	46.4092	157.479																1.38701	107.95	4.59257	41.2835	149.728
1.36029	150.241	5.29568	53.1854	204.371	1.39491	137.557	5.81531	53.5211	191.88						1.38983	173.722	6.36927	66.7839	241.443	1.41023	127.399	6.35935	51.6692	179.661	1.41926	112.356	6.92448	46.5716	159.463																1.40269	103.185	4.61101	41.0791	144.736
1.36923	146.348	5.3178	53.1168	200.384	1.38144	143.025	5.83867	53.7223	197.581						1.37499	181.295	6.39264	66.9992	249.279	1.40817	128.51	6.38501	51.8502	180.965	1.41287	114.929	6.95183	46.896	162.38																1.39195	106.779	4.62911	41.3598	148.63
1.36792	147.076	5.33742	53.1863	201.189	1.39338	138.693	5.86597	53.7637	193.252						1.38909	174.266	6.41859	66.8833	242.071	1.41131	127.673	6.40994	51.9108	180.186	1.39342	121.117	6.97677	47.0696	168.767																1.39452	106.393	4.6473	41.4886	148.367
1.36922	146.656	5.35787	53.228	200.805	1.3959	137.951	5.89091	53.8037	192.566						1.38923	174.837	6.44109	67.1306	242.888	1.42642	123.384	6.43474	52.0289	175.996	1.41134	115.898	7.00522	47.1204	163.572																1.38512	109.425	4.6661	41.6397	151.568
1.36785	147.471	5.38065	53.3156	201.718	1.38173	143.922	5.91647	54.0948	198.861						1.38406	177.754	6.46298	67.3259	246.021	1.4338	121.401	6.45745	52.0905	174.065	1.40284	118.825	7.03004	47.2971	166.692																1.39607	105.896	4.68337	41.4532	147.839
1.3744	144.64	5.40209	53.2393	198.793	1.39093	140.535	5.93901	54.1334	195.474						1.39129	174.828	6.48536	67.4899	243.236	1.43041	122.655	6.48021	52.223	175.448	1.40641	117.85	7.05631	47.3321	165.746																1.40473	103.345	4.7018	41.3566	145.172
1.37428	144.7	5.42445	53.2443	198.858	1.39224	139.528	5.96175	53.9243	194.257						1.38452	177.771	6.50803	67.4165	246.128	1.4342	121.67	6.50234	52.2741	174.499	1.41513	114.694	7.07843	47.0684	162.307																1.3782	111.555	4.72017	41.6847	153.746
1.36174	150.654	5.4472	53.5502	205.152	1.38338	143.669	5.98734	54.2357	198.749						1.39753	171.775	6.53304	67.3856	240.061	1.42715	123.499	6.52494	52.1826	176.252	1.39734	120.683	7.10107	47.375	168.635																1.39737	105.822	4.73855	41.5647	147.873
1.37513	144.917	5.46806	53.4508	199.28	1.40292	136.857	6.01243	54.3397	191.999						1.39553	173.266	6.55526	67.6177	241.798	1.41447	128.001	6.55186	52.4539	181.053	1.39174	122.88	7.12693	47.5496	171.017																1.41877	99.7352	4.75677	41.3113	141.501
1.37293	145.679	5.48886	53.4106	200.007	1.39228	141.014	6.03598	54.4899	196.33						1.38722	177.507	6.57785	67.8039	246.242	1.42344	125.378	6.57552	52.5124	178.467	1.40973	117.874	7.15556	47.7343	166.171																1.40269	104.544	4.7754	41.6222	146.643
1.37318	145.762	5.51331	53.4785	200.158	1.40713	135.303	6.05882	54.3066	190.388						1.38766	177.782	6.60082	67.9822	246.702	1.42896	124.132	6.59889	52.6658	177.38	1.41999	114.415	7.17723	47.509	162.467																1.39322	107.547	4.79448	41.7883	149.837
1.37134	146.683	5.5356	53.545	201.152	1.3901	142.089	6.08159	54.6099	197.518						1.38862	177.692	6.62799	68.1056	246.747	1.41507	128.505	6.62092	52.7527	181.843	1.41502	116.294	7.20421	47.7058	164.558																1.38958	108.672	4.81289	41.8362	151.008
1.37946	143.138	5.55483	53.4182	197.452	1.39821	139.474	6.10534	54.7238	195.014						1.38887	177.469	6.65026	68.0811	246.483	1.41632	128.306	6.64395	52.8345	181.723	1.4061	119.246	7.22842	47.8569	167.673																1.37588	113.182	4.83078	42.0227	155.725
1.37127	147.025	5.57448	53.6633	201.612	1.38991	142.854	6.129	54.8634	198.553						1.3808	182.014	6.67342	68.3525	251.325	1.42652	125.505	6.67061	52.9525	179.037	1.43794	109.781	7.25011	47.5544	157.859																1.37379	113.738	4.84905	41.9957	156.253
1.36322	150.701	5.59643	53.7891	205.438	1.38414	145.276	6.15223	54.9591	201.082						1.38502	180.185	6.69656	68.432	249.56	1.41416	129.299	6.6927	52.9589	182.85	1.42799	112.455	7.27132	47.5936	160.584																1.39348	107.835	4.86734	41.9399	150.267
1.36892	148.194	5.61777	53.7417	202.866	1.38793	143.963	6.17824	55.0221	199.81						1.39778	174.426	6.71986	68.4589	243.808	1.41297	130.02	6.7159	53.1035	183.715	1.42192	115.024	7.29704	47.9785	163.555																1.38112	111.763	4.88555	42.083	154.358
1.36319	150.848	5.6374	53.844	205.634	1.40058	139.416	6.20222	55.0278	195.263						1.39588	175.678	6.7422	68.6253	245.227	1.41929	128.508	6.73896	53.2999	182.39	1.44026	109.661	7.31725	47.7625	157.941																1.37933	112.875	4.90388	42.3037	155.692
1.37461	146.183	5.65951	53.8423	200.946	1.38907	144.074	6.22507	55.2241	200.129						1.38816	179.577	6.76462	68.7623	249.282	1.4182	128.792	6.76189	53.2623	182.654	1.42292	114.62	7.33739	47.9363	163.095																1.38278	111.903	4.92272	42.3188	154.737
1.38237	143.194	5.68184	53.8502	197.948	1.40431	138.625	6.24849	55.2417	194.672						1.39317	177.595	6.78632	68.8853	247.421	1.43087	125.028	6.78766	53.3032	178.899	1.43441	111.404	7.35698	47.8763	159.799																1.38083	112.606	4.94166	42.3707	155.489
1.3692	148.86	5.70568	54.0201	203.819	1.39783	140.998	6.27149	55.2833	197.091						1.38789	180.327	6.80889	68.9949	250.274	1.41159	131.486	6.81059	53.4998	185.604	1.42932	112.865	7.37671	47.9282	161.32																1.38163	112.283	4.96063	42.3376	155.133
1.36858	149.202	5.72975	54.0513	204.194	1.38083	148.278	6.29384	55.6152	204.746						1.38771	180.89	6.83099	69.1818	251.024	1.43455	124.821	6.83556	53.6759	179.062	1.43717	110.871	7.39666	47.9481	159.34																1.3959	107.993	4.9823	42.2421	150.748
1.37644	145.861	5.75001	53.9951	200.769	1.39659	142.159	6.31806	55.5476	198.539						1.4035	173.906	6.85545	69.2665	244.077	1.41905	129.397	6.85788	53.633	183.621	1.43216	112.437	7.41663	48.0632	161.028																1.38391	111.714	5.0008	42.3812	154.603
1.38324	143.158	5.77061	53.9647	198.023	1.41405	135.577	6.33997	55.353	191.713						1.38181	184.43	6.87778	69.4481	254.848	1.4254	127.988	6.88205	53.8629	182.434	1.428	113.904	7.43674	48.2168	162.655																1.39075	109.539	5.01909	42.3007	152.341
1.36729	150.24	5.79057	54.2406	205.422	1.41101	137.057	6.36149	55.5401	193.39						1.3846	183.329	6.90157	69.5241	253.837	1.43874	124.144	6.90507	53.88	178.611	1.4447	109.41	7.45727	48.1375	158.064																1.39046	110.098	5.03714	42.4848	153.087
1.37259	148.052	5.81033	54.2405	203.215	1.41162	136.771	6.38234	55.5112	193.07						1.39398	179.031	6.92371	69.5919	249.566	1.40493	134.889	6.9273	54.0051	189.51	1.45283	107.187	7.47737	48.0353	155.723																1.37338	115.714	5.05551	42.6778	158.918
1.37713	146.087	5.83154	54.1734	201.18	1.40869	138.039	6.40431	55.6219	194.454						1.38736	182.498	6.94547	69.7335	253.191	1.41327	132.601	6.95369	54.1874	187.401	1.43022	113.595	7.49749	48.3401	162.466																1.38479	111.94	5.07404	42.5643	155.012
1.37011	149.664	5.85365	54.4491	205.057	1.39841	142.371	6.42557	55.899	199.094						1.38041	186.589	6.96744	69.9997	257.569	1.43017	127.397	6.97949	54.2248	182.199	1.42151	116.195	7.51771	48.4335	165.173																1.37681	114.693	5.09257	42.6954	157.911
1.37326	148.424	5.87828	54.4627	203.824	1.40622	139.555	6.44714	55.884	196.245						1.39065	181.79	6.9901	70.0644	252.807	1.42974	127.917	7.00301	54.3659	182.888	1.43505	112.549	7.53795	48.438	161.515																1.39546	108.785	5.11083	42.5205	151.806
1.36942	149.827	5.89836	54.4139	205.177	1.39693	143.086	6.46849	55.9674	199.88						1.38435	184.969	7.01216	70.115	256.062	1.42046	130.748	7.02524	54.3775	185.723	1.39826	124.078	7.55771	48.836	173.493																1.40109	107.234	5.12914	42.5189	150.245
1.36141	153.938	5.92126	54.668	209.573	1.40877	138.85	6.48957	55.956	195.607						1.38474	184.927	7.03547	70.1804	256.076	1.4156	132.518	7.04856	54.4615	187.593	1.45237	108.244	7.5777	48.4616	157.211																1.39162	110.258	5.14742	42.6776	153.437
1.37752	146.505	5.94321	54.3877	201.813	1.39883	142.92	6.51068	56.1746	199.921						1.3915	182.14	7.05805	70.3522	253.448	1.4214	131.158	7.07449	54.6749	186.428	1.43025	114.599	7.59785	48.7705	163.906																1.38081	113.953	5.166	42.879	157.349
1.36904	150.409	5.96638	54.5589	205.917	1.40236	141.917	6.53212	56.2831	199.019						1.38731	184.477	7.07999	70.4795	255.926	1.41228	134.433	7.10249	54.7931	189.857	1.43715	112.729	7.61791	48.7541	162.008																1.39941	108.139	5.18416	42.7003	151.332
1.37026	150.216	5.98865	54.6729	205.835	1.4116	138.342	6.55374	56.1438	195.283						1.39497	181.061	7.10228	70.5608	252.574	1.4251	130.734	7.1283	54.952	186.308	1.43299	114.022	7.6382	48.8384	163.392																1.38785	111.947	5.20239	42.912	155.365
1.37847	146.969	6.00871	54.7029	202.592	1.40781	140.004	6.57644	56.2875	197.099						1.38618	185.786	7.12506	70.7583	257.532	1.42564	130.954	7.15059	55.144	186.694	1.43769	112.83	7.65836	48.8568	162.215																1.3902	111.344	5.22091	42.9413	154.791
1.36794	151.56	6.03005	54.8097	207.325	1.39985	143.422	6.59769	56.5211	200.77						1.38719	185.288	7.14734	70.7731	257.029	1.44423	124.844	7.1731	54.8832	180.304	1.4189	118.479	7.67861	49.075	168.109																1.38127	114.497	5.23898	43.1324	158.151
1.37259	149.775	6.05046	54.8655	205.581	1.41012	139.706	6.6188	56.4913	197.003						1.38323	188.027	7.17213	71.0444	260.084	1.4146	134.689	7.19541	55.229	190.531	1.42562	116.402	7.69854	49.0011	165.945																1.38004	114.869	5.25692	43.1298	158.524
1.37302	149.481	6.06956	54.8267	205.24	1.40301	142.791	6.64004	56.7215	200.338						1.38774	185.908	7.19492	71.1116	257.992	1.40128	139.445	7.21936	55.3065	195.402	1.42893	115.847	7.71856	49.1484	165.538																1.37118	117.779	5.27598	43.1775	161.496
1.36048	155.614	6.09078	55.117	211.71	1.40482	142.186	6.66178	56.7382	199.746						1.38414	188.206	7.22152	71.3142	260.505	1.42933	130.466	7.24335	55.4234	186.478	1.4305	115.327	7.73894	49.1054	164.975																1.38175	114.545	5.29505	43.2035	158.272
1.37149	150.417	6.11179	54.9323	206.295	1.40955	140.37	6.68313	56.6787	197.858						1.38648	187.595	7.24429	71.5218	260.096	1.41365	135.857	7.26597	55.5692	192.054	1.43167	115.609	7.75919	49.3636	165.514																1.39279	111.145	5.31354	43.155	154.801
1.36911	151.673	6.13307	55.0302	207.657	1.40435	142.744	6.70374	56.8975	200.462						1.3848	188.522	7.26629	71.5507	261.066	1.41864	134.281	7.29352	55.5902	190.496	1.42432	117.459	7.77923	49.2914	167.298																1.3769	116.25	5.33236	43.2858	160.064
1.36514	153.814	6.15441	55.1939	209.979	1.39677	146.005	6.72517	57.0857	203.936						1.39498	183.443	7.28871	71.4985	255.899	1.41639	135.295	7.31787	55.7227	191.631	1.43408	114.986	7.79953	49.3756	164.899																1.39273	111.505	5.35091	43.2825	155.296
1.3696	151.662	6.17299	55.1132	207.718	1.40413	143.493	6.74658	57.1616	201.483						1.38831	187.429	7.31082	71.7951	260.209	1.42612	132.41	7.34471	55.7994	188.832	1.42423	117.75	7.81924	49.4048	167.703																1.39205	112.062	5.36997	43.4237	155.997
1.36703	153.123	6.19466	55.2366	209.325	1.40438	143.318	6.7684	57.1324	201.274						1.38738	188.155	7.33325	71.9016	261.044	1.4169	135.581	7.36684	55.902	192.104	1.42256	118.581	7.8395	49.55	168.689																1.38274	114.9	5.38904	43.4571	158.876
1.36576	153.826	6.21857	55.2972	210.09	1.40039	145.619	6.7907	57.4645	203.924						1.38883	187.779	7.35618	72.0274	260.794	1.43937	128.792	7.39487	55.9799	185.379	1.41812	120.328	7.85952	49.7479	170.638																1.38525	114.465	5.40759	43.5781	158.562
1.37168	151.44	6.23856	55.3415	207.727	1.4004	146.03	6.81246	57.6232	204.501						1.38219	191.563	7.37968	72.1932	264.777	1.42667	132.621	7.41773	55.9816	189.207	1.43098	116.411	7.87899	49.629	166.582																1.38504	114.474	5.42708	43.5418	158.551
1.36772	153.113	6.25863	55.3455	209.416	1.40246	144.941	6.83375	57.4952	203.275						1.39271	186.445	7.40325	72.2504	259.663	1.43065	132.328	7.44552	56.3682	189.315	1.42345	118.818	7.89895	49.7586	169.131																1.37543	117.903	5.44502	43.7234	162.167
1.36634	154.166	6.2795	55.5092	210.643	1.4063	143.593	6.85503	57.5118	201.935						1.39129	187.474	7.42536	72.3722	260.831	1.42065	135.419	7.46727	56.3453	192.383	1.41771	120.7	7.91868	49.855	171.118																1.37807	116.958	5.46326	43.6845	161.176
1.36675	154.024	6.302	55.5196	210.513	1.40435	144.702	6.87652	57.6766	203.213						1.38784	189.634	7.44794	72.5582	263.183	1.42334	135.031	7.49147	56.5558	192.195	1.44067	114.149	7.93823	49.7744	164.452																1.38776	113.895	5.48127	43.6424	158.06
1.37347	151.117	6.32125	55.4986	207.555	1.3922	149.378	6.89801	57.7223	207.964						1.39458	186.489	7.47117	72.5873	260.075	1.41245	138.789	7.51346	56.6163	196.034	1.44211	113.713	7.95807	49.7445	163.987																1.4083	107.523	5.4991	43.4123	151.425
1.37487	150.151	6.34265	55.3449	206.439	1.39994	146.965	6.92163	57.9321	205.742						1.38528	191.479	7.49374	72.7677	265.251	1.4166	137.735	7.53857	56.7322	195.116	1.43364	116.257	7.97797	49.8724	166.671																1.38514	115.351	5.51694	43.8979	159.776
1.36384	155.731	6.36371	55.6845	212.392	1.4101	143.351	6.94268	57.9609	202.139						1.38233	193.573	7.52004	72.9998	267.582	1.40829	140.941	7.5619	56.8999	198.485	1.40978	123.566	7.99812	50.0584	174.201																1.39037	113.838	5.53543	43.922	158.277
1.37797	149.763	6.38918	55.6607	206.369	1.40474	145.422	6.964	58.021	204.28						1.38499	192.429	7.54542	73.0499	266.512	1.42666	135.233	7.60916	57.0667	192.932	1.40957	124.71	8.03073	50.4837	175.787																1.39196	113.284	5.55425	43.8887	157.687
1.37774	149.985	6.40844	55.7193	206.641	1.40748	144.666	6.98491	58.1138	203.614						1.39414	188.031	7.57046	73.0996	262.143	1.41513	139.285	7.63148	57.1846	197.105	1.40282	126.986	8.05293	50.549	178.139																1.37639	118.861	5.57517	44.1765	163.598
1.37151	152.587	6.42796	55.7351	209.274	1.39308	151.032	7.00829	58.4781	210.399						1.38193	194.941	7.59276	73.435	269.395	1.42996	134.557	7.65482	57.2311	192.41	1.40191	127.615	8.0771	50.6825	178.905																1.38852	114.343	5.59284	43.9002	158.767
1.37797	150.146	6.44822	55.8113	206.897	1.39257	151.17	7.03112	58.4583	210.514						1.38176	195.15	7.61579	73.4814	269.652	1.43458	132.806	7.67723	57.1099	190.521	1.39522	130.063	8.10145	50.7849	181.466																1.383	116.445	5.61091	44.0687	161.043
1.37412	151.931	6.46821	55.894	208.772	1.39029	151.843	7.05409	58.3718	211.105						1.39924	186.291	7.643	73.4053	260.666	1.41229	140.827	7.70016	57.407	198.888	1.40964	125.538	8.12632	50.8286	176.964																1.38969	114.592	5.62911	44.135	159.246
1.36528	156.463	6.48986	56.1685	213.614	1.38651	154.679	7.08114	58.8693	214.464						1.38027	197.003	7.66475	73.883	271.918	1.41009	142.092	7.72311	57.6273	200.363	1.40327	127.73	8.1496	50.9045	179.24																1.38533	115.839	5.64736	44.1126	160.475
1.37805	150.296	6.51076	55.8766	207.115	1.39656	150.427	7.1043	58.7717	210.08						1.38345	195.444	7.68736	73.9241	270.387	1.41018	142.164	7.74618	57.6692	200.477	1.41223	125.017	8.17728	50.9392	176.552																1.384	116.538	5.66583	44.221	161.289
1.36662	155.905	6.53401	56.1781	213.062	1.38425	156.2	7.12816	59.0958	216.219						1.3806	196.9	7.71018	73.9155	271.841	1.41467	140.563	7.76949	57.653	198.85	1.41167	125.609	8.2047	51.1114	177.318																1.3957	112.608	5.68365	44.047	157.167
1.37648	151.535	6.55512	56.0981	208.586	1.3907	153.794	7.15278	59.1804	213.882						1.39038	192.445	7.73259	74.116	267.57	1.41617	140.292	7.79596	57.7505	198.677	1.41592	124.589	8.22872	51.2267	176.409																1.40003	111.757	5.70234	44.2023	156.463
1.36648	156.255	6.57706	56.2843	213.519	1.3918	153.668	7.18209	59.2918	213.875						1.39791	188.862	7.75495	74.1653	264.012	1.40977	143.175	7.82019	58.0245	201.844	1.40777	127.179	8.25298	51.2541	179.039																1.38351	117.352	5.72108	44.4736	162.357
1.37826	151.288	6.59916	56.2817	208.513	1.39974	150.02	7.20491	59.0924	209.989						1.38628	195.493	7.77691	74.4924	271.008	1.43092	135.735	7.84408	57.876	194.225	1.40267	129.403	8.28142	51.4867	181.51																1.38475	116.776	5.74024	44.3886	161.706
1.37089	154.431	6.62103	56.3074	211.707	1.40157	149.503	7.2279	59.1585	209.539						1.39853	189.42	7.79967	74.4975	264.911	1.43533	134.958	7.8702	58.1422	193.71	1.40519	128.482	8.30404	51.4489	180.542																1.3799	118.408	5.75824	44.45	163.391
1.37317	153.78	6.64552	56.4161	211.166	1.39139	154.623	7.25187	59.6034	215.14						1.38912	194.69	7.84482	74.7379	270.448	1.42599	138.441	7.89272	58.3332	197.415	1.39668	131.482	8.32817	51.5292	183.638																1.38505	116.864	5.77701	44.4708	161.862
1.37845	151.358	6.66645	56.3348	208.638	1.38188	158.745	7.27523	59.6903	219.366						1.38655	195.923	7.86688	74.7073	271.657	1.43918	134.05	7.91454	58.2642	192.921	1.39342	133.166	8.35305	51.7565	185.557																1.39566	113.91	5.79547	44.5557	158.979
1.37677	152.457	6.68745	56.4884	209.898	1.38398	158.18	7.30091	59.8065	218.919						1.39344	193.228	7.89099	75.0182	269.252	1.4105	144.108	7.9363	58.5057	203.265	1.40312	129.897	8.37883	51.7466	182.262																1.38099	118.422	5.81371	44.586	163.54
1.37741	152.103	6.70992	56.4503	209.508	1.38632	157.933	7.32573	60.0805	218.945						1.37959	200.895	7.91322	75.2087	277.153	1.42695	138.743	7.96163	58.6105	197.979	1.40376	129.695	8.40307	51.7487	182.06																1.38783	116.505	5.83179	44.6555	161.689
1.37911	151.513	6.73119	56.4931	208.953	1.39526	153.96	7.34893	59.945	214.814						1.38509	197.944	7.93776	75.1973	274.171	1.41533	143.014	7.9846	58.7264	202.412	1.40625	129.445	8.43079	51.9687	182.032																1.39161	115.333	5.85038	44.6467	160.499
1.3871	148.628	6.75342	56.601	206.161	1.40656	149.357	7.37181	59.8473	210.08						1.38144	200.408	7.96136	75.3984	276.852	1.43267	137.235	8.00797	58.7621	196.612	1.39258	134.207	8.45336	52.0505	186.895																1.39108	115.442	5.8682	44.6222	160.589
1.37559	153.461	6.77415	56.6833	211.1	1.39639	153.73	7.39449	60.0426	214.667						1.4005	190.773	7.98416	75.4131	267.177	1.43795	136.038	8.03169	58.9354	195.615	1.40658	129.396	8.47907	51.9925	182.007																1.38256	118.969	5.88591	44.9726	164.482
1.37316	154.996	6.79527	56.8725	212.834	1.40566	150.162	7.41726	60.0352	211.076						1.39268	195.291	8.00608	75.6633	271.977	1.43688	136.178	8.05392	58.8753	195.67	1.40826	129.287	8.50417	52.1682	182.071																1.3815	119.037	5.90461	44.8764	164.45
1.3782	152.699	6.82335	56.7897	210.45	1.39614	154.821	7.44122	60.4154	216.151						1.3899	196.969	8.02842	75.7721	273.767	1.40785	146.74	8.07619	59.1827	206.587	1.4252	123.222	8.52637	51.8087	175.615																1.37709	120.591	5.92287	44.925	166.064
1.37639	153.474	6.84384	56.8057	211.241	1.38419	160.251	7.46432	60.6173	221.817						1.39236	196.186	8.05093	75.9485	273.162	1.43798	136.589	8.10052	59.2096	196.412	1.40364	131.216	8.55214	52.3389	184.18																1.37722	120.99	5.94426	45.0949	166.63
1.38272	151.304	6.86381	56.9641	209.211	1.39452	155.473	7.48701	60.431	216.811						1.38525	200.296	8.07358	76.1153	277.46	1.43305	138.407	8.12264	59.312	198.345	1.41132	128.834	8.57667	52.377	181.826																1.38131	119.475	5.96233	45.0172	165.032
1.3757	154.49	6.88612	57.0727	212.531	1.39996	153.329	7.50994	60.4287	214.655						1.38386	201.329	8.09647	76.2385	278.611	1.4194	143.332	8.14501	59.4648	203.445	1.39027	136.241	8.60041	52.5195	189.412																1.38717	118.018	5.98071	45.1576	163.711
1.38603	149.96	6.90616	56.9551	207.849	1.40265	152.287	7.53185	60.4302	213.606						1.3782	204.992	8.11887	76.4599	282.52	1.42454	141.614	8.16968	59.4778	201.734	1.40206	132.319	8.63079	52.5689	185.519																1.3962	114.628	5.99865	44.8929	160.044
1.36791	157.921	6.92883	57.1098	216.021	1.38731	159.757	7.55582	60.9322	221.631						1.39446	196.219	8.14148	76.3791	273.618	1.41184	146.691	8.19349	59.7235	207.104	1.40702	131.035	8.65727	52.709	184.37																1.3879	117.756	6.01671	45.1448	163.434
1.37086	156.799	6.95039	57.1715	214.95	1.38917	159.249	7.57987	61.031	221.224						1.38137	203.876	8.16457	76.6779	281.629	1.41484	145.905	8.21784	59.8692	206.433	1.42996	123.233	8.67884	52.4015	176.218																1.38995	117.111	6.03621	45.1382	162.778
1.37326	156.355	6.97003	57.3961	214.716	1.38545	160.939	7.60411	61.0847	222.973						1.38125	203.887	8.19041	76.6735	281.619	1.40791	148.911	8.24129	60.0673	209.652	1.39474	135.934	8.704	53.0122	189.592																1.38443	119.628	6.05417	45.4468	165.617
1.37522	155.411	6.99062	57.3468	213.724	1.38285	162.543	7.62849	61.2698	224.774						1.3794	205.544	8.21316	76.9142	283.528	1.4401	137.312	8.26436	59.8118	197.743	1.41508	128.986	8.72924	52.9256	182.525																1.37154	123.888	6.07203	45.4677	169.917
1.37592	155.455	7.0126	57.462	213.893	1.39381	158.344	7.65343	61.4212	220.701						1.3879	201.027	8.23727	76.9384	279.006	1.42627	142.433	8.28788	60.0484	203.148	1.4172	128.154	8.75543	52.856	181.62																1.39851	115.009	6.09014	45.3116	160.841
1.38263	152.168	7.03371	57.2699	210.392	1.39065	159.13	7.67625	61.2323	221.295						1.38084	205.243	8.2602	77.0954	283.408	1.43557	139.546	8.31002	60.1548	200.329	1.40625	132.111	8.77813	53.0435	185.781																1.39871	115.389	6.10799	45.4831	161.396
1.37419	156.506	7.05507	57.5904	215.069	1.38759	161.329	7.70203	61.5786	223.859						1.38004	206.304	8.28354	77.3363	284.708	1.4149	147.179	8.33243	60.3987	208.243	1.42986	124.368	8.80016	52.8715	177.829																1.40087	114.17	6.12587	45.2492	159.936
1.37682	155.606	7.07533	57.6694	214.242	1.39734	157.626	7.72522	61.7023	220.257						1.38226	205.251	8.30758	77.3604	283.71	1.43456	140.634	8.35791	60.4796	201.748	1.39722	135.934	8.82624	53.3483	189.93																1.38736	119.157	6.14434	45.6212	165.314
1.38002	153.867	7.09576	57.5181	212.34	1.39056	160.571	7.75024	61.7611	223.285						1.39698	197.197	8.33217	77.2631	275.48	1.42028	145.537	8.38111	60.4842	206.703	1.41029	131.5	8.85467	53.3237	185.453																1.38303	120.809	6.16258	45.7303	167.083
1.37524	156.345	7.11664	57.6873	215.012	1.38819	161.824	7.77365	61.859	224.642						1.39049	201.399	8.35474	77.6065	280.044	1.44779	136.774	8.40543	60.6324	198.019	1.40735	132.564	8.87874	53.371	186.565																1.39427	116.73	6.18092	45.4954	162.753
1.37598	156	7.13819	57.6761	214.654	1.3907	161.189	7.79789	62.0239	224.166						1.39234	200.953	8.37721	77.7961	279.795	1.40712	151.439	8.42835	60.9478	213.093	1.4132	131.127	8.90361	53.5565	185.308																1.38217	121.382	6.19901	45.8387	167.771
1.38066	154.659	7.15918	57.9099	213.531	1.40754	154.023	7.82089	61.8726	216.793						1.37704	209.856	8.39962	78.0386	288.981	1.4267	143.966	8.45165	60.7746	205.396	1.41331	130.59	8.92555	53.3549	184.564																1.38196	121.661	6.21756	45.9265	168.132
1.39919	146.912	7.18004	57.7312	205.558	1.4023	156.377	7.84338	61.9972	219.287						1.37424	211.927	8.4225	78.2153	291.239	1.41009	150.747	8.47823	61.1192	212.566	1.3874	140.348	8.95035	53.7006	194.719																1.37474	124.109	6.2355	45.9472	170.618
1.37544	157.158	7.20214	58.0183	216.162	1.39155	161.42	7.86649	62.2621	224.624						1.3825	207.479	8.44672	78.2903	286.841	1.44352	139.3	8.50566	61.1541	201.082	1.41085	132.218	8.97778	53.6897	186.539																1.38412	120.879	6.25384	45.8931	167.311
1.38665	152.328	7.22137	57.9516	211.225	1.4082	154.403	7.88928	62.127	217.429						1.38707	205.399	8.4696	78.4429	284.903	1.41712	148.774	8.52779	61.386	210.83	1.41254	131.474	8.99991	53.615	185.713																1.37571	124.052	6.27209	46.0497	170.661
1.37405	157.994	7.24188	58.1141	217.092	1.40662	155.042	7.9121	62.1394	218.084						1.37997	209.711	8.4918	78.5942	289.396	1.42911	144.896	8.55301	61.5247	207.072	1.41223	131.627	9.02207	53.638	185.887																1.39158	119.158	6.29028	46.1254	165.818
1.38055	154.958	7.26355	58.001	213.928	1.38197	166.29	7.93496	62.5442	229.809						1.39533	201.662	8.51457	78.6828	281.386	1.41809	148.833	8.57605	61.5336	211.059	1.41361	132.076	9.04465	54.0028	186.704																1.40207	115.36	6.30752	45.8554	161.742
1.38352	153.799	7.28582	58.0195	212.784	1.38001	167.708	7.95987	62.7416	231.439						1.38234	209.12	8.53704	78.8687	289.074	1.42732	145.395	8.6006	61.4697	207.525	1.40067	136.65	9.06872	54.1011	191.401																1.39527	117.552	6.32527	45.9315	164.018
1.39436	149.465	7.30905	58.0061	208.408	1.38764	164.856	7.98327	62.9314	228.761						1.38865	205.626	8.55903	78.8433	285.543	1.43209	144.583	8.62347	61.8205	207.056	1.40335	136.037	9.09786	54.2208	190.907																1.37847	123.695	6.34357	46.2541	170.51
1.37896	157.338	7.32911	58.6478	216.962	1.40238	158.307	8.00584	62.773	222.006						1.39269	203.707	8.58087	78.9354	283.701	1.44249	140.709	8.64531	61.6297	202.972	1.41426	132.563	9.1229	54.2826	187.478																1.38776	120.58	6.36135	46.2091	167.336
1.39336	150.111	7.34853	58.1167	209.158	1.38494	166.759	8.02951	63.2085	230.951						1.38587	207.939	8.60346	79.146	288.176	1.42793	146.474	8.66741	62.0213	209.155	1.40429	136.178	9.14691	54.4073	191.232																1.38809	120.701	6.37957	46.2952	167.543
1.36964	161.303	7.36896	58.6221	220.927	1.39728	160.963	8.05303	63.0071	224.911						1.38883	206.681	8.62555	79.2884	287.044	1.42883	146.388	8.68949	62.1147	209.164	1.39811	138.427	9.17366	54.449	193.536																1.38782	120.85	6.39863	46.3269	167.718
1.37942	157.176	7.39172	58.6528	216.812	1.38764	165.859	8.07668	63.3205	230.153						1.38255	210.453	8.6476	79.4124	290.961	1.43886	142.985	8.71173	62.1031	205.735	1.40183	137.395	9.1968	54.5578	192.605																1.37827	124.275	6.41669	46.448	171.284
1.38195	155.887	7.41287	58.5635	215.429	1.40837	156.287	8.09941	62.9104	220.11						1.39024	206.678	8.67132	79.5856	287.332	1.4405	142.31	8.73479	62.0322	204.997	1.3998	138.1	9.22482	54.5518	193.313																1.37031	127.437	6.43478	46.6128	174.628
1.37413	159.762	7.43447	58.7698	219.532	1.3953	162.354	8.12242	63.2279	226.533						1.38125	211.687	8.69325	79.6059	292.393	1.42488	148.504	8.75754	62.4085	211.6	1.4037	137	9.24774	54.6582	192.306																1.39106	120.31	6.45541	46.4877	167.358
1.37272	160.17	7.45474	58.7019	219.868	1.40112	160.322	8.14556	63.3639	224.63						1.39547	204.208	8.71754	79.7002	284.966	1.41763	151.669	8.78136	62.632	215.01	1.41678	133.076	9.3274	54.8343	188.54																1.37795	124.867	6.47343	46.6326	172.06
1.38531	154.586	7.47496	58.6009	214.149	1.38883	166.426	8.16968	63.731	231.137						1.39219	206.642	8.73968	79.9692	287.685	1.41327	153.307	8.80528	62.672	216.665	1.41619	133.427	9.35348	54.8955	188.958																1.38431	122.894	6.49158	46.6775	170.124
1.37601	159.228	7.49614	58.8831	219.099	1.3895	166.469	8.19264	63.8614	231.309						1.37892	214.386	8.76239	80.1217	295.62	1.42716	148.591	8.83047	62.803	212.064	1.4149	133.586	9.37483	54.7926	189.011																1.38103	124.239	6.50998	46.7796	171.578
1.38154	157.039	7.51727	58.9376	216.956	1.38934	166.889	8.21568	63.9943	231.865						1.39581	205.153	8.78537	80.1414	286.355	1.42344	150.159	8.85277	62.9067	213.743	1.39977	139.534	9.39893	55.1196	195.317																1.39215	120.572	6.52829	46.7403	167.855
1.36562	164.472	7.53832	59.1015	224.606	1.38999	166.818	8.23848	64.0809	231.875						1.37853	215.168	8.80741	80.3301	296.615	1.42739	149.234	8.87645	63.1129	213.014	1.42041	131.897	9.42013	54.8278	187.347																1.39158	120.866	6.54637	46.7845	168.195
1.38006	157.88	7.55811	59.0271	217.883	1.38972	167.181	8.26322	64.1659	232.336						1.3819	213.899	8.83163	80.5837	295.588	1.4175	152.73	8.89889	63.0661	216.495	1.40478	138.206	9.44396	55.2865	194.149																1.38256	123.697	6.56444	46.7664	171.018
1.40094	149.743	7.57834	59.1082	209.781	1.39516	165.136	8.28798	64.2774	230.39						1.39677	205.575	8.85596	80.5033	287.142	1.43291	146.793	8.92333	62.8862	210.341	1.40609	137.917	9.46808	55.3544	193.924																1.38798	121.852	6.58264	46.7306	169.128
1.38868	154.616	7.598	59.1362	214.712	1.40399	160.854	8.31069	64.0468	225.837						1.38303	214.229	8.88218	80.9005	296.284	1.42603	150.328	8.94709	63.3395	214.371	1.40944	136.91	9.49001	55.407	192.965																1.37395	126.954	6.60087	46.9032	174.428
1.38247	157.536	7.61962	59.2683	217.789	1.38872	168.711	8.33441	64.585	234.292						1.38066	215.448	8.90501	80.8882	297.46	1.41738	153.919	8.96934	63.5494	218.161	1.42875	130.075	9.51183	55.1526	185.844																1.38666	122.602	6.61895	46.8531	170.007
1.36992	163.262	7.64087	59.3703	223.655	1.40897	159.348	8.35737	64.2383	224.517						1.38786	211.89	8.9296	81.0664	294.074	1.42362	151.874	8.99294	63.6268	216.211	1.40679	138.331	9.53729	55.614	194.603																1.37612	126.488	6.63729	47.0081	174.063
1.38957	154.271	7.66167	59.1337	214.37	1.39084	167.393	8.38009	64.448	232.817						1.39987	205.264	8.95159	81.0135	287.344	1.42387	151.39	9.01572	63.4691	215.56	1.4084	137.497	9.55911	55.5008	193.651																1.3776	126.281	6.65516	47.1158	173.964
1.37455	161.753	7.68134	59.5781	222.338	1.39182	167.796	8.40426	64.7662	233.542						1.38771	212.628	8.97334	81.3346	295.067	1.43154	149.209	9.04132	63.7236	213.598	1.42913	130.25	9.58074	55.2792	186.145																1.39426	120.592	6.67333	47.0043	168.137
1.37638	160.65	7.70152	59.467	221.115	1.39524	167.109	8.4282	65.0625	233.157						1.39385	209.467	8.99565	81.4142	291.966	1.4308	149.713	9.06383	63.8229	214.209	1.43241	129.641	9.60262	55.4454	185.698																1.38326	124.321	6.69126	47.0867	171.968
1.37813	159.989	7.72232	59.5025	220.486	1.39242	168.419	8.45232	65.0972	234.51						1.38218	216.41	9.0183	81.5695	299.117	1.4084	158.546	9.08608	64.0359	223.296	1.43559	128.645	9.62428	55.4265	184.682																1.37855	126.424	6.70983	47.2827	174.282
1.37915	159.805	7.74287	59.5965	220.396	1.41221	159.634	8.47517	64.8729	225.438						1.3943	209.946	9.04088	81.6947	292.728	1.41992	153.937	9.11069	63.9524	218.578	1.41609	135.873	9.64698	55.8921	192.409																1.38271	124.964	6.72769	47.2585	172.789
1.39444	153.189	7.76309	59.4723	213.614	1.38565	171.904	8.49891	65.2842	238.198						1.38783	213.997	9.06286	81.8862	296.993	1.42492	152.585	9.13666	64.1285	217.422	1.40651	139.686	9.67244	56.1199	196.469																1.3911	122.386	6.74651	47.3173	170.251
1.37412	162.622	7.78634	59.8273	223.462	1.41282	159.606	8.52205	64.9616	225.495						1.38012	218.949	9.08727	82.0858	302.176	1.41767	155.679	9.16034	64.3264	220.702	1.42795	131.852	9.69444	55.8035	188.278																1.38716	123.866	6.76471	47.3985	171.821
1.37409	162.987	7.80819	59.9507	223.959	1.40108	165.003	8.54524	65.2197	231.182						1.39326	211.573	9.11281	82.1121	294.776	1.41934	155.432	9.18794	64.4764	220.611	1.42825	131.938	9.71627	55.8804	188.441																1.38735	123.545	6.78413	47.2819	171.4
1.37849	160.602	7.82804	59.7899	221.389	1.39062	170.845	8.56908	65.7309	237.581						1.39225	212.808	9.13548	82.3735	296.282	1.41573	157.043	9.21047	64.5729	222.331	1.4271	132.74	9.73846	56.0646	189.434																1.37841	126.882	6.80195	47.4414	174.894
1.37638	162.099	7.84914	59.9958	223.11	1.4108	161.306	8.59183	65.3255	227.57						1.38436	217.571	9.15741	82.4933	301.196	1.41771	156.702	9.23483	64.754	222.158	1.42978	131.891	9.76078	56.0595	188.575																1.37707	127.707	6.82047	47.5794	175.861
1.37383	163.843	7.87064	60.2254	225.092	1.39229	170.305	8.61516	65.8046	237.115						1.38583	217.158	9.18121	82.6611	300.945	1.41632	157.398	9.26069	64.8207	222.926	1.41903	135.555	9.78253	56.1622	192.356																1.3753	128.509	6.83966	47.6372	176.738
1.37321	163.954	7.89165	60.1649	225.143	1.39071	171.059	8.63783	65.8341	237.894						1.38724	216.585	9.20596	82.7507	300.455	1.42449	153.788	9.28465	64.5935	219.069	1.42056	135.406	9.80452	56.3069	192.352																1.39659	121.122	6.8575	47.4892	169.158
1.37448	163.519	7.91343	60.2125	224.755	1.38838	173.008	8.66183	66.1717	240.201						1.39276	213.972	9.22888	82.9364	298.011	1.42038	156.309	9.33091	65.0063	222.017	1.42049	135.672	9.82592	56.4107	192.721																1.38761	124.171	6.87592	47.5711	172.301
1.37258	164.695	7.93548	60.3332	226.058	1.39481	170.075	8.68531	66.144	237.222						1.38949	215.927	9.25099	82.9845	300.029	1.41685	157.908	9.35402	65.1156	223.731	1.41877	136.715	9.85212	56.6036	193.966																1.38439	125.576	6.89407	47.7086	173.846
1.38484	159.314	7.95789	60.3105	220.625	1.39052	172.356	8.70878	66.2901	239.663						1.40262	208.498	9.27291	82.8606	292.443	1.41661	158.369	9.37724	65.2707	224.346	1.39412	146.107	9.8762	56.8899	203.691																1.38818	124.163	6.91235	47.6397	172.361
1.37823	162.769	7.98101	60.5467	224.334	1.38437	175.607	8.73212	66.4644	243.106						1.38797	217.366	9.29493	83.2091	301.697	1.40747	162.734	9.4011	65.5629	229.042	1.41799	137.016	9.89828	56.6244	194.287																1.38798	123.985	6.92999	47.5425	172.088
1.38579	159.493	8.00128	60.5404	221.024	1.39183	172.128	8.75544	66.4431	239.573						1.38712	218.534	9.31744	83.466	303.132	1.4029	164.833	9.42595	65.6409	231.244	1.41445	138.428	9.91965	56.7182	195.8																1.39091	123.687	6.9478	47.7964	172.038
1.37539	164.037	8.0213	60.5609	225.614	1.39402	171.623	8.77908	66.6134	239.246						1.38438	220.22	9.3392	83.5029	304.867	1.43619	152.047	9.45031	65.6395	218.368	1.41997	136.324	9.94245	56.6057	193.575																1.38318	126.701	6.96669	47.9705	175.251
1.37314	165.17	8.0411	60.6097	226.801	1.386	175.779	8.80487	66.8094	243.63						1.38822	218.62	9.36186	83.7431	303.492	1.42889	154.805	9.4736	65.6738	221.2	1.41934	137.535	9.96473	57.0223	195.208																1.39738	121.809	6.9846	47.8599	170.214
1.37878	162.636	8.06147	60.5901	224.239	1.39656	170.915	8.82824	66.7726	238.692						1.39726	214.041	9.38423	83.9258	299.071	1.40954	162.645	9.49598	65.877	229.255	1.40712	141.89	9.98981	57.0929	199.656																1.3834	126.793	7.00306	48.0481	175.405
1.38176	161.708	8.08402	60.722	223.443	1.39423	172.314	8.85124	66.9189	240.245						1.38271	222.341	9.40644	83.9434	307.434	1.41788	159.555	9.52169	65.9585	226.23	1.40852	141.202	10.0113	57.0191	198.886																1.39842	121.245	7.02068	47.7583	169.551
1.37371	165.318	8.10552	60.7451	227.099	1.40717	166.113	8.87438	66.6681	233.748						1.39372	216.321	9.43127	84.0497	301.49	1.44068	150.057	9.54612	65.4569	216.184	1.40436	143.634	10.0389	57.3967	201.715																1.38553	126.075	7.03917	48.0441	174.681
1.38262	161.282	8.12574	60.7067	222.992	1.4072	166.308	8.8975	66.7512	234.028						1.3896	219.323	9.45325	84.3168	304.77	1.41706	160.11	9.56938	66.0602	226.886	1.40751	141.995	10.0605	57.1974	199.859																1.3842	126.968	7.0573	48.2148	175.748
1.378	164.089	8.14888	60.9981	226.114	1.38529	177.729	8.92181	67.4299	246.206						1.39409	216.879	9.47484	84.3481	302.35	1.44119	150.032	9.59349	65.5214	216.224	1.39998	145.864	10.0861	57.6539	204.206																1.38963	124.766	7.07522	48.0553	173.379
1.38701	159.449	8.16958	60.7176	221.156	1.39323	173.881	8.94629	67.3503	242.257						1.3925	218.277	9.49693	84.5425	303.95	1.42369	158.396	9.61978	66.3728	225.507	1.4128	141.264	10.11	57.6455	199.578																1.38504	126.922	7.09348	48.3021	175.791
1.3729	166.587	8.19082	61.0747	228.707	1.40875	166.346	8.96955	67.0236	234.34						1.37794	227.29	9.51874	84.7269	313.192	1.42763	157.002	9.64206	66.4252	224.141	1.43275	133.673	10.132	57.2173	191.521																1.39591	123.299	7.1117	48.2605	172.114
1.39405	157.351	8.21202	61.0239	219.355	1.3869	177.653	8.99253	67.6876	246.387						1.39628	216.808	9.54148	84.8051	302.725	1.43551	154.464	9.66443	66.5722	221.736	1.39537	148.331	10.1564	57.9418	206.976																1.39761	122.72	7.12971	48.2456	171.514
1.37302	166.805	8.23303	61.1784	229.026	1.39162	175.579	9.0156	67.7348	244.341						1.3911	220.113	9.56341	84.9487	306.199	1.40857	165.256	9.68667	66.7742	232.776	1.42317	137.58	10.1781	57.5707	195.799																1.38884	125.967	7.14787	48.4212	174.948
1.38438	161.808	8.25493	61.1821	224.004	1.401	170.645	9.03897	67.43	239.073						1.3876	222.098	9.58631	84.9373	308.183	1.43668	154.405	9.73314	66.733	221.831	1.41199	141.699	10.1996	57.71	200.078																1.38901	125.926	7.16591	48.4221	174.913
1.37434	166.619	8.27778	61.3317	228.992	1.39668	173.283	9.0632	67.728	242.021						1.38959	221.825	9.61187	85.2821	308.246	1.43466	155.525	9.75564	66.903	223.127	1.43331	134.877	10.2255	57.8072	193.32																1.38822	126.34	7.18384	48.4816	175.387
1.37858	164.864	8.30078	61.3818	227.278	1.4095	167.976	9.0861	67.8073	236.762						1.39478	219.208	9.63509	85.3905	305.748	1.43229	156.6	9.7778	66.9931	224.297	1.40532	145.167	10.2505	58.1493	204.006																1.40213	121.404	7.20211	48.2764	170.224
1.38386	162.671	8.32244	61.4232	225.115	1.41246	166.258	9.10725	67.6061	234.833						1.38848	222.947	9.65741	85.465	309.558	1.40614	167.413	9.80029	67.227	235.406	1.4	147.657	10.2744	58.3645	206.719																1.38714	126.922	7.22051	48.5637	176.058
1.38146	163.932	8.34366	61.515	226.465	1.37212	186.732	9.13026	68.3939	256.219						1.39267	221.419	9.68024	85.8089	308.364	1.43845	154.627	9.8252	67.1067	222.425	1.40274	147.109	10.3003	58.5487	206.356																1.38525	127.72	7.23894	48.6305	176.923
1.3856	162.345	8.36487	61.5851	224.945	1.37869	183.742	9.15831	68.4929	253.323						1.38211	227.72	9.70211	85.8432	314.735	1.41311	164.782	9.84782	67.315	232.854	1.40633	145.376	10.3238	58.3839	204.448																1.38039	129.783	7.25668	48.7847	179.151
1.36801	170.694	8.38775	61.7498	233.511	1.37282	187.071	9.18487	68.6411	256.814						1.3913	222.996	9.7258	86.1161	310.254	1.44584	151.281	9.87208	66.7714	218.728	1.40904	144.688	10.3488	58.4981	203.871																1.3887	126.875	7.27566	48.7438	176.192
1.38294	163.936	8.41126	61.7472	226.714	1.38382	181.959	9.21061	68.7712	251.798						1.3952	220.969	9.74789	86.1879	308.296	1.40887	167.198	9.89612	67.6083	235.561	1.41569	141.999	10.3704	58.3584	201.027																1.4198	116.763	7.2944	48.4952	165.781
1.38034	165.222	8.43092	61.817	228.063	1.39392	177.314	9.23532	68.8	247.161						1.40054	218.457	9.76977	86.3717	305.959	1.4088	167.468	9.92115	67.7101	235.929	1.42529	138.838	10.3921	58.3888	197.884																1.38393	129.211	7.3126	49.0296	178.818
1.37777	166.586	8.45226	61.8884	229.516	1.37223	188.224	9.25838	68.9523	258.286						1.39579	221.664	9.79181	86.5892	309.396	1.41515	165.078	9.94569	67.8	233.61	1.41778	141.888	10.4144	58.606	201.166																1.38908	127.642	7.33081	49.0947	177.305
1.3787	166.027	8.47255	61.8451	228.901	1.39112	179.313	9.28694	69.0759	249.446						1.41107	214.056	9.81467	86.8935	302.047	1.43589	157.353	9.97034	67.8562	225.942	1.41639	142.091	10.4363	58.4936	201.257																1.38189	130.066	7.34912	49.0882	179.737
1.38425	163.831	8.49249	61.9362	226.783	1.38798	180.995	9.31058	69.1564	251.216						1.40153	219.664	9.83722	87.0594	307.865	1.41907	163.953	9.99275	67.9726	232.661	1.41456	143.875	10.4634	58.9645	203.519																1.39504	125.261	7.36725	48.9245	174.744
1.37562	168.022	8.51341	62.0608	231.133	1.39088	180.106	9.33417	69.3364	250.506						1.41219	214.121	9.86081	87.1624	302.38	1.41553	165.611	10.0182	68.0801	234.428	1.40888	146.021	10.489	59.0111	205.726																1.38489	129.35	7.38501	49.2034	179.136
1.37327	169.588	8.53475	62.2413	232.889	1.39711	176.594	9.35704	69.1051	246.722						1.40603	217.722	9.88263	87.2768	306.124	1.43806	156.936	10.042	68.016	225.684	1.42982	138.027	10.5104	58.6742	197.353																1.40802	121.365	7.40318	48.978	170.884
1.38006	166.282	8.55573	62.1673	229.479	1.39857	176.337	9.37816	69.2591	246.62						1.40976	216.834	9.90552	87.7384	305.685	1.41368	167.379	10.0647	68.467	236.621	1.40864	145.817	10.5323	58.8977	205.404																1.39647	125.52	7.42105	49.2032	175.285
1.37988	166.816	8.57546	62.3378	230.187	1.38539	183.413	9.39987	69.6182	254.098						1.40971	217.004	9.92741	87.7929	305.913	1.41473	166.766	10.0874	68.4215	235.929	1.41493	145.027	10.5594	59.4904	205.203																1.40024	124.311	7.43887	49.197	174.064
1.38238	165.788	8.59567	62.3634	229.183	1.3985	176.465	9.42118	69.2981	246.787						1.4025	221.347	9.94944	87.9576	310.439	1.41039	169.199	10.1123	68.685	238.637	1.39875	151.002	10.5831	59.4967	211.214																1.39418	126.018	7.45638	49.1057	175.692
1.3701	171.506	8.61679	62.4099	234.981	1.39434	179.375	9.44238	69.7016	250.111						1.40588	220.026	9.97377	88.177	309.331	1.42613	163.195	10.1386	68.8126	232.738	1.41862	143.385	10.6048	59.3516	203.409																1.39605	125.745	7.47484	49.2384	175.545
1.37105	171.481	8.63662	62.5698	235.109	1.40105	176.057	9.46265	69.585	246.665						1.39642	225.514	9.99562	88.2359	314.912	1.41409	167.705	10.1605	68.6941	237.15	1.40449	149.327	10.6295	59.6937	209.727																1.37859	132.722	7.49492	49.6338	182.968
1.38249	165.844	8.65842	62.3974	229.278	1.40142	176.289	9.48293	69.7442	247.055						1.40199	222.992	10.0195	88.4607	312.632	1.42455	164.444	10.1857	69.0474	234.259	1.41031	147.463	10.6569	59.8063	207.967																1.4055	123.323	7.51287	49.4542	173.331
1.37069	172.222	8.67869	62.7709	236.063	1.40851	173.157	9.50339	69.7302	243.894						1.40591	221.089	10.0431	88.6071	310.832	1.42857	162.958	10.208	69.1005	232.798	1.42184	142.8	10.6784	59.5653	203.039																1.3744	134.436	7.53153	49.7304	184.769
1.38079	167.702	8.70074	62.8075	231.561	1.40799	173.694	9.52368	69.8575	244.559						1.40851	219.986	10.0658	88.7427	309.851	1.41221	169.46	10.2307	69.0784	239.315	1.39266	154.678	10.7026	60.0068	215.413																1.38239	131.643	7.54999	49.7529	181.982
1.37169	171.794	8.72274	62.7785	235.648	1.39183	181.628	9.54492	70.1202	252.797						1.40942	219.698	10.0878	88.8196	309.647	1.42125	165.951	10.2552	69.1361	235.858	1.40321	150.872	10.7283	60.1183	211.706																1.39929	125.917	7.56874	49.7181	176.195
1.38299	166.653	8.74418	62.7834	230.48	1.41592	170.631	9.56515	69.9792	241.6						1.41964	212.484	10.1098	88.0743	301.651	1.41101	170.805	10.2782	69.439	241.008	1.39837	152.795	10.7538	60.1455	213.665																1.3952	127.083	7.58741	49.6523	177.306
1.37743	169.492	8.76544	62.9081	233.464	1.3983	178.816	9.58544	70.1847	250.038						1.41763	214.843	10.1338	88.6156	304.569	1.40946	171.789	10.3044	69.5537	242.129	1.42613	141.594	10.7752	59.6694	201.932																1.38984	129.413	7.6056	49.8752	179.863
1.37841	169.121	8.78716	62.9401	233.119	1.38941	183.255	9.60604	70.2981	254.616						1.40991	219.314	10.1556	88.7626	309.213	1.41398	169.984	10.3306	69.5969	240.353	1.3977	153.567	10.7993	60.3469	214.641																1.39194	128.418	7.62355	49.7568	178.75
1.39021	163.833	8.80677	62.9151	227.762	1.38881	184.672	9.63366	70.7165	256.473						1.39798	226.347	10.1768	88.9127	316.428	1.41179	171.323	10.3546	69.7871	241.872	1.41729	145.603	10.8208	60.0728	206.363																1.39882	126.546	7.64144	49.9035	177.015
1.3811	168.759	8.82956	63.2542	233.073	1.37636	191.507	9.6546	70.9559	263.582						1.40059	224.223	10.2003	88.6281	314.044	1.41156	171.843	10.3814	69.9574	242.566	1.42823	141.815	10.8428	60.0612	202.545																1.38285	132.569	7.66064	50.1395	183.322
1.36842	174.632	8.85209	63.2489	238.971	1.3889	185.479	9.67994	71.0549	257.611						1.4023	223.328	10.2217	88.6906	313.172	1.4265	165.928	10.4047	70.0325	236.696	1.40773	149.769	10.8642	60.3593	210.834																1.3795	133.475	7.67921	50.0624	184.129
1.38667	166.344	8.87362	63.2841	230.665	1.39004	185.373	9.7245	71.2152	257.675						1.40426	222.473	10.2432	88.7802	312.409	1.40806	173.931	10.4281	70.1631	244.906	1.42737	142.426	10.8854	60.1957	203.295																1.39664	127.903	7.6997	50.1676	178.634
1.38439	167.745	8.89585	63.4294	232.224	1.38678	187.557	9.7459	71.4362	260.101						1.38967	231.024	10.2646	88.8275	321.047	1.42471	167.127	10.4527	70.2053	238.107	1.40598	151.229	10.9091	60.682	212.626																1.39926	127.119	7.71783	50.1903	177.873
1.37094	173.998	8.91714	63.4647	238.541	1.38158	190.487	9.76688	71.5625	263.173						1.40081	224.358	10.2862	88.7597	314.283	1.41047	173.504	10.4756	70.4227	244.722	1.42215	144.812	10.9308	60.4479	205.945																1.39919	127.157	7.73608	50.1942	177.917
1.37693	171.504	8.93888	63.5719	236.148	1.39282	184.615	9.78886	71.4276	257.135						1.40082	224.84	10.3082	88.9626	314.961	1.42667	166.73	10.4994	70.3982	237.869	1.41686	146.899	10.9524	60.546	208.134																1.38227	133.473	7.75572	50.413	184.496
1.37041	175.336	8.95938	63.8577	240.282	1.39319	184.859	9.81031	71.5897	257.544						1.39463	227.153	10.3307	88.4769	316.794	1.41873	170.563	10.5218	70.6607	241.984	1.42247	145.167	10.9742	60.6456	206.497																1.3887	130.92	7.77441	50.3022	181.809
1.37448	173.202	8.98073	63.7763	238.062	1.39078	186.553	9.83234	71.7977	259.454						1.39389	228.672	10.3592	88.8515	318.744	1.4239	168.714	10.5444	70.7654	240.232	1.42712	143.466	10.996	60.6001	204.743																1.38509	132.406	7.792	50.3965	183.394
1.37769	171.901	9.00047	63.8591	236.825	1.38704	188.531	9.85602	71.8492	261.499						1.38424	235.113	10.3829	89.0896	325.452	1.43184	165.744	10.5681	70.8037	237.318	1.40182	153.685	11.0182	61.03	215.438																1.39006	131.1	7.8104	50.5556	182.236
1.37811	171.743	9.02231	63.8648	236.681	1.3774	193.505	9.87782	71.879	266.534						1.38868	232.149	10.4053	89.043	322.381	1.42831	167.273	10.5913	70.8652	238.917	1.40973	151.277	11.044	61.2646	213.26																1.38512	132.987	7.82834	50.6218	184.203
1.38017	170.955	9.04239	63.9294	235.946	1.39095	186.997	9.90294	72.0002	260.104						1.37063	244.355	10.4273	89.3109	334.919	1.42449	169.434	10.6138	71.1644	241.357	1.40638	152.464	11.0652	61.2418	214.422																1.386	133.095	7.84677	50.7847	184.471
1.37385	174.117	9.06568	64.0061	239.211	1.38418	190.738	9.92486	72.1467	264.015						1.39144	231.559	10.4531	89.4152	322.2	1.42337	169.92	10.6361	71.1817	241.86	1.39339	158.432	11.0901	61.5749	220.758																1.39374	129.994	7.86484	50.606	181.178
1.37441	173.975	9.08616	64.0598	239.112	1.39133	187.451	9.946	72.2575	260.806						1.3798	238.783	10.4747	89.4558	329.472	1.42637	169.259	10.6594	71.3819	241.425	1.40258	154.94	11.1177	61.6421	217.315																1.37401	137.63	7.88266	50.8616	189.105
1.37203	175.605	9.1168	64.2261	240.935	1.38903	189.077	9.96748	72.436	262.633						1.38805	232.966	10.4996	89.1625	323.368	1.42631	169.453	10.6822	71.4569	241.693	1.40396	154.561	11.1427	61.7063	216.998																1.39195	131.177	7.90129	50.8351	182.592
1.38537	169.328	9.13648	64.209	234.583	1.39029	188.654	9.98926	72.5144	262.284						1.37538	241.633	10.5218	89.4647	332.336	1.41851	172.432	10.7048	71.3882	244.596	1.41821	148.453	11.1647	61.3866	210.538																1.38866	132.485	7.92081	50.8877	183.976
1.36656	179.187	9.15923	64.562	244.869	1.38237	193.309	10.0107	72.7745	267.225						1.36914	245.67	10.5464	89.3848	336.357	1.43014	168.215	10.7282	71.6125	240.571	1.40737	153.616	11.1869	61.8565	216.195																1.38143	135.335	7.93973	51.0236	186.956
1.3689	178.115	9.18139	64.5967	243.822	1.38933	189.914	10.033	72.8139	263.852						1.372	244.144	10.5692	89.5732	334.966	1.42375	171.428	10.7502	71.8791	244.071	1.43262	144.011	11.2087	61.6249	206.313																1.39128	132.18	7.95775	51.1272	183.899
1.3776	173.572	9.20304	64.4606	239.114	1.38468	192.611	10.0549	72.9551	266.704						1.38432	236.22	10.5953	89.5369	327.004	1.41666	174.246	10.7728	71.8224	246.846	1.43601	143.05	11.2301	61.699	205.421																1.3751	138.042	7.97562	51.1647	189.822
1.37484	174.872	9.22272	64.4649	240.42	1.39766	186.053	10.0776	72.8861	260.039						1.40533	222.96	10.6197	89.2331	313.334	1.41154	176.984	10.7967	72.0365	249.819	1.40488	155.56	11.2558	62.2448	218.542																1.3842	134.744	7.99374	51.1685	186.514
1.37848	173.437	9.24412	64.5567	239.08	1.38802	191.4	10.0994	73.1332	265.667						1.37123	245.336	10.6452	89.7706	336.414	1.41145	177.245	10.8216	72.1406	250.172	1.40412	155.893	11.2817	62.2591	218.893																1.38783	133.996	8.01341	51.3542	185.964
1.38029	172.879	9.2647	64.6717	238.622	1.39335	188.373	10.1202	72.9904	262.471						1.38028	239.797	10.6688	89.9534	330.988	1.41376	176.621	10.8496	72.2939	249.699	1.43893	142.74	11.3038	61.9822	205.394																1.39969	129.494	8.03116	51.1799	181.251
1.37494	175.532	9.28757	64.7161	241.346	1.38873	191.699	10.1426	73.3814	266.218						1.38567	235.448	10.6949	89.5568	326.253	1.40775	179.498	10.8742	72.3928	252.688	1.41082	153.853	11.3311	62.4791	217.059																1.39472	130.966	8.04926	51.1135	182.661
1.37209	177.548	9.31227	64.9538	243.611	1.37984	196.574	10.1651	73.4982	271.24						1.39272	231.607	10.718	89.7774	322.563	1.41396	177.028	10.9025	72.496	250.309	1.43014	146.224	11.3527	62.2126	209.121																1.38792	134.052	8.06793	51.4105	186.054
1.3713	178.463	9.33471	65.1447	244.726	1.39533	188.566	10.1904	73.4395	263.111						1.38092	239.57	10.74	90.03	330.826	1.42658	172.334	10.9309	72.7424	245.848	1.42455	148.614	11.3746	62.3968	211.708																1.40855	126.598	8.08669	51.1649	178.32
1.37443	177.077	9.35697	65.1978	243.38	1.40213	185.091	10.212	73.3423	259.521						1.37863	241.169	10.7649	90.0671	332.483	1.41806	176.248	10.9534	72.8871	249.93	1.39384	161.364	11.3979	62.7918	224.915																1.39215	132.983	8.10501	51.5597	185.132
1.37964	174.593	9.37919	65.193	240.876	1.38669	193.599	10.2331	73.7247	268.462						1.38355	238.739	10.7915	90.2997	330.306	1.43079	171.185	10.9769	72.9518	244.93	1.40095	158.717	11.4273	62.8888	222.355																1.39387	132.844	8.1226	51.7305	185.167
1.3652	182.346	9.39855	65.4652	248.938	1.38689	194.234	10.2578	73.9916	269.381						1.37485	243.534	10.8144	90.0193	334.823	1.416	177.813	11.0001	73.139	251.783	1.43211	146.469	11.4487	62.6049	209.76																1.37908	138.427	8.14028	51.8565	190.902
1.36884	180.557	9.41943	65.4706	247.153	1.3794	198.911	10.2825	74.2885	274.378						1.38223	240.605	10.8437	90.6918	332.571	1.42444	174.45	11.0231	73.2365	248.495	1.40628	157.082	11.4709	63.0812	220.901																1.38886	134.823	8.15898	51.827	187.251
1.37368	178.062	9.4412	65.4233	244.6	1.39757	188.707	10.304	73.9172	263.731						1.36428	253.051	10.8654	90.8806	345.232	1.40737	182.118	11.0462	73.3442	256.308	1.41906	151.653	11.4926	62.839	215.206																1.39858	131.682	8.17711	51.9004	184.168
1.37016	180.309	9.46262	65.6208	247.053	1.3917	192.719	10.3262	74.3438	268.206						1.38515	238.806	10.8919	90.7607	330.781	1.42432	175.194	11.0718	73.5503	249.534	1.40096	160.011	11.5155	63.4053	224.169																1.38054	138.447	8.19598	52.0719	191.131
1.39001	170.519	9.48195	65.4523	237.022	1.39924	189.192	10.349	74.4138	264.724						1.37652	243.743	10.9159	90.5145	335.517	1.41029	181.305	11.094	73.5829	255.692	1.39376	162.952	11.5406	63.3918	227.116																1.39512	133.135	8.21439	52.0154	185.739
1.378	176.597	9.50727	65.6482	243.35	1.40463	186.309	10.3701	74.2833	261.695						1.38024	242.223	10.9395	90.8692	334.325	1.42158	176.937	11.1235	73.7848	251.53	1.39818	161.472	11.5653	63.5349	225.768																1.38865	135.536	8.23323	52.0679	188.212
1.36858	181.73	9.52837	65.8485	248.712	1.38862	195.107	10.3916	74.6692	270.931						1.36846	251.578	10.962	91.4148	344.275	1.41471	179.901	11.1469	73.7726	254.507	1.40694	158.404	11.5887	63.7182	222.866																1.383	137.834	8.25171	52.1732	190.624
1.38006	176.161	9.54834	65.8585	243.113	1.37209	204.637	10.4149	74.9333	280.781						1.37642	245.286	10.9844	91.0794	337.617	1.41301	181.292	11.1702	74.041	256.168	1.39925	161.81	11.6106	63.8451	226.412																1.39358	134.458	8.27096	52.3221	187.377
1.37942	176.052	9.56819	65.7086	242.85	1.38553	197.558	10.4394	75.0008	273.724						1.37476	247.076	11.0081	91.3387	339.67	1.40864	183.209	11.1945	74.051	258.075	1.40127	161.035	11.6353	63.8617	225.655																1.39139	135.097	8.28884	52.2756	187.973
1.3718	180.233	9.58743	65.8985	247.244	1.38753	196.785	10.4608	75.0963	273.046						1.374	248.077	11.0321	91.5146	340.858	1.42005	178.829	11.2247	74.2848	253.947	1.40385	160.251	11.6638	63.9607	224.969																1.40359	130.858	8.30675	52.2324	183.671
1.37316	179.925	9.60926	66.0172	247.066	1.39378	193.633	10.4814	75.1164	269.882						1.37256	248.946	11.0572	91.4898	341.694	1.4187	179.831	11.248	74.4599	255.125	1.40704	159.141	11.6862	64.0262	223.918																1.38433	138.148	8.32492	52.4829	191.243
1.3809	176.473	9.63239	66.1143	243.691	1.37489	204.493	10.5032	75.4569	281.156						1.3911	237.826	11.0797	91.8008	330.841	1.4247	177.234	11.2707	74.4668	252.505	1.40674	159.55	11.7109	64.1438	224.446																1.39427	134.582	8.34337	52.4687	187.644
1.39654	169.03	9.65358	65.9742	236.057	1.40592	188.871	10.5288	75.5538	265.538						1.44306	104.948	11.1253	45.964	151.446	1.41096	183.715	11.2935	74.6576	259.214	1.40958	158.607	11.7361	64.2143	223.57																1.38935	136.676	8.36124	52.6072	189.891
1.37912	177.693	9.67327	66.2698	245.061	1.3964	193.02	10.5489	75.3865	269.533						1.3938	120.06	11.1461	46.6655	167.339	1.41289	182.953	11.3209	74.719	258.492	1.40615	159.299	11.7576	63.9534	223.999																1.41194	128.376	8.37954	52.3069	181.259
1.38326	175.733	9.6942	66.2603	243.085	1.39642	193.716	10.57	75.651	270.509						1.38738	122.092	11.1694	46.6784	169.388	1.41011	184.734	11.3485	74.925	260.495	1.4257	151.906	11.7807	63.9516	216.572																1.39357	135.406	8.39731	52.6901	188.698
1.38144	177.125	9.71484	66.4623	244.688	1.39064	196.959	10.5915	75.7771	273.899						1.38657	122.637	11.1916	46.784	170.045	1.4208	180.478	11.3724	75.147	256.423	1.39993	163.449	11.8027	64.5984	228.817																1.39191	136.393	8.41551	52.8542	189.847
1.38101	177	9.73657	66.3328	244.438	1.39297	196.065	10.6123	75.8903	273.113						1.3813	124.962	11.2154	47.0078	172.609	1.40153	189.628	11.3944	75.2964	265.769	1.40809	160.271	11.8244	64.6542	225.676																1.38433	139.634	8.43421	53.0504	193.3
1.37582	180.021	9.75721	66.5412	247.678	1.38942	197.819	10.6332	75.8731	274.854						1.39024	121.709	11.2382	46.8791	169.204	1.41394	183.742	11.4204	75.2286	259.801	1.42551	153.016	11.8457	64.3929	218.125																1.39015	137.139	8.45267	52.8914	190.643
1.38562	175.565	9.77798	66.6148	243.266	1.40442	190.092	10.6552	75.7701	266.97						1.38664	122.991	11.2619	46.9253	170.544	1.40155	190.482	11.4453	75.6463	266.97	1.42139	154.655	11.8675	64.4468	219.825																1.39496	135.892	8.47135	53.0731	189.565
1.37198	182.517	9.79951	66.7544	250.409	1.38719	200.176	10.6768	76.3254	277.682						1.3968	119.724	11.2855	46.9009	167.231	1.41763	183.146	11.4688	75.6767	259.632	1.43727	149.031	11.8891	64.4671	214.197																1.38087	141.256	8.49049	53.1746	195.057
1.37378	181.942	9.81956	66.8756	249.948	1.38654	200.821	10.6987	76.4358	278.446						1.39339	121.21	11.3087	47.0679	168.893	1.41186	185.72	11.4912	75.6521	262.21	1.40261	163.449	11.9121	65.0415	229.256																1.38609	139.575	8.50826	53.27	193.464
1.38075	178.517	9.84013	66.8636	246.488	1.39127	197.952	10.7191	76.2913	275.405						1.40016	118.965	11.3322	47.0069	166.571	1.41744	183.736	11.5152	75.8866	260.435	1.40498	162.717	11.938	65.1257	228.614																1.39924	134.789	8.52597	53.2155	188.603
1.37317	182.492	9.86088	66.9644	250.592	1.38997	199.883	10.744	76.7695	277.832						1.40797	116.642	11.3547	46.9961	164.229	1.42183	182.259	11.5373	76.0736	259.141	1.40483	162.932	11.9701	65.1907	228.891																1.39657	136.095	8.5437	53.3646	190.065
1.37333	183.051	9.88534	67.193	251.389	1.37229	209.927	10.7663	76.9116	288.08						1.3945	121.166	11.3767	47.1855	168.967	1.42985	178.823	11.5593	76.073	255.69	1.42382	155.067	11.9913	64.9917	220.787																1.38298	141.585	8.56179	53.5964	195.809
1.37277	183.298	9.9071	67.1843	251.626	1.38842	201.324	10.7897	77.0129	279.522						1.38359	125.114	11.4007	47.3399	173.106	1.40712	189.405	11.5813	76.2709	266.515	1.42691	154.238	12.0127	65.1211	220.083																1.39273	137.415	8.58078	53.3637	191.382
1.37589	181.68	9.92911	67.1555	249.971	1.39496	198.078	10.8108	77.0657	276.311						1.37146	130.536	11.4291	47.8046	179.025	1.4071	190.082	11.6085	76.5176	267.465	1.40898	162.279	12.0383	65.6034	228.648																1.38926	139.193	8.59847	53.5651	193.376
1.37469	182.784	9.94937	67.3501	251.27	1.38177	205.591	10.832	77.2796	284.08						1.39138	122.798	11.4522	47.437	170.859	1.40364	192.542	11.6323	76.8406	270.259	1.42231	156.533	12.0595	65.374	222.638																1.39845	135.944	8.61655	53.5701	190.111
1.38579	177.804	9.97056	67.4945	246.399	1.39932	195.765	10.8526	77.0203	273.938						1.38253	125.843	11.4775	47.4969	173.982	1.41167	188.732	11.6562	76.8632	266.427	1.40477	164.348	12.0873	65.747	230.87																1.39132	138.838	8.63514	53.7188	193.168
1.3797	181.07	9.9905	67.6348	249.821	1.38208	206.205	10.8743	77.5666	284.99						1.39151	123.466	11.5032	47.7138	171.804	1.41426	188.283	11.6822	77.1462	266.281	1.41159	161.841	12.1102	65.8524	228.453																1.38217	142.606	8.65285	53.8635	197.105
1.37639	182.456	10.0112	67.5387	251.131	1.38977	202.047	10.8962	77.5585	280.799						1.39091	123.545	11.525	47.6694	171.84	1.40431	193.016	11.7046	77.1815	271.054	1.41857	158.024	12.1323	65.4028	224.168																1.38508	141.439	8.6708	53.842	195.904
1.38084	180.82	10.0305	67.7482	249.683	1.3956	199.072	10.9228	77.5691	277.824						1.38131	126.805	11.5482	47.7138	175.157	1.40899	191.386	11.7319	77.4248	269.66	1.39839	168.024	12.1587	66.1446	234.963																1.39601	137.488	8.68888	53.84	191.935
1.37461	183.943	10.0524	67.7583	252.849	1.38405	206.114	10.9445	77.9435	285.272						1.3932	123.095	11.5715	47.7741	171.496	1.4143	188.947	11.7573	77.4271	267.228	1.40363	166.08	12.182	66.2557	233.116																1.39221	139.252	8.70659	53.9959	193.868
1.37598	183.344	10.0728	67.7963	252.277	1.38119	208.209	10.9664	78.1381	287.577						1.39738	121.894	11.5974	47.8156	170.332	1.41597	188.833	11.7807	77.6749	267.382	1.41574	161.282	12.2053	66.2926	228.334																1.39806	137.07	8.72483	53.9568	191.633
1.36998	187.044	10.0938	68.0385	256.247	1.39771	199.312	10.9872	78.0948	278.58						1.38127	127.519	11.6203	47.9762	176.138	1.42257	185.676	11.8044	77.6045	264.138	1.41637	160.526	12.2268	66.0838	227.364																1.37899	144.765	8.74255	54.2211	199.63
1.37725	183.107	10.1171	67.9362	252.185	1.40411	195.72	11.0075	77.9494	274.814						1.38579	126.221	11.6471	48.0592	174.916	1.41001	191.795	11.8272	77.7706	270.431	1.41325	162.223	12.2482	66.279	229.261																1.39813	137.248	8.76067	54.0344	191.889
1.37704	183.386	10.1383	68.0008	252.529	1.41907	188.276	11.0285	77.7952	267.176						1.40222	120.544	11.6688	47.8712	169.03	1.425	184.871	11.8511	77.7555	263.442	1.40376	167.222	12.2744	66.7237	234.739																1.38538	142.768	8.77893	54.3904	197.788
1.37745	183.53	10.1602	68.1251	252.802	1.39661	200.273	11.0486	78.2623	279.703						1.38888	125.547	11.6924	48.1905	174.37	1.39519	199.948	11.8737	78.1254	278.965	1.41096	164.236	12.2957	66.7227	231.729																1.38604	142.515	8.79748	54.3922	197.532
1.37137	187.197	10.1814	68.3483	256.716	1.40621	195.586	11.069	78.2985	275.035						1.38152	128.071	11.7144	48.2109	176.933	1.38893	203.244	11.9007	78.1413	282.292	1.42171	159.243	12.3171	66.408	226.397																1.40403	136.22	8.81599	54.4342	191.256
1.37712	184.037	10.202	68.2546	253.44	1.39749	201.35	11.0903	78.849	281.384						1.41932	116.528	11.7374	48.2758	165.39	1.41781	187.984	11.9244	77.6981	266.525	1.38987	174.045	12.3396	67.0381	241.901																1.40137	136.705	8.83367	54.2619	191.576
1.37672	184.743	10.223	68.442	254.338	1.40642	196.709	11.1109	78.7977	276.656						1.37624	130.31	11.7599	48.3681	179.337	1.42003	187.124	11.949	77.7723	265.722	1.41303	164.377	12.3666	67.1223	232.269																1.39624	138.851	8.8513	54.4006	193.87
1.38697	180.062	10.2461	68.5476	249.74	1.39783	200.702	11.1314	78.672	280.549						1.39653	123.6	11.7845	48.3891	172.611	1.39996	196.02	11.9712	77.5162	274.42	1.40756	166.633	12.3895	67.1335	234.546																1.38011	145.955	8.87015	54.8344	201.433
1.36868	189.734	10.2675	68.7645	259.684	1.40522	197.031	11.1515	78.6954	276.871						1.38329	128.45	11.8087	48.5848	177.684	1.39922	196.677	11.9993	77.6095	275.193	1.42014	161.699	12.4113	67.1773	229.635																1.3948	140.419	8.88831	54.821	195.856
1.37435	186.942	10.2973	68.8104	256.923	1.39075	206.063	11.1735	79.3043	286.582						1.38927	126.082	11.8318	48.4355	175.161	1.39808	197.583	12.0308	77.7343	276.237	1.40949	166.535	12.4333	67.4103	234.729																1.40662	135.82	8.90662	54.6257	191.047
1.3759	186.128	10.3192	68.8001	256.093	1.40163	200.415	11.1946	79.314	280.909						1.3996	122.948	11.8545	48.5061	172.078	1.38744	203.15	12.0549	77.7675	281.859	1.42303	160.403	12.4549	67.102	228.259																1.38703	143.207	8.92476	54.7894	198.632
1.37593	186.216	10.3418	68.8418	256.221	1.39581	203.383	11.2149	79.3146	283.883						1.38165	129.46	11.9036	48.7548	178.869	1.40902	192.781	12.0813	77.9621	271.632	1.42192	161.545	12.4766	67.4053	229.704																1.40624	135.977	8.94249	54.6342	191.216
1.37578	186.598	10.363	68.9574	256.719	1.39352	205.117	11.2354	79.5179	285.835						1.38743	127.728	11.9288	48.8207	177.213	1.4175	188.174	12.1068	77.6916	266.736	1.42379	160.67	12.4977	67.3406	228.76																1.39342	141.294	8.96016	54.9618	196.882
1.37853	185.715	10.3844	69.1501	256.013	1.40964	196.385	11.2555	79.3023	276.833						1.4008	123.356	11.9512	48.8191	172.797	1.40057	196.438	12.1341	77.7746	275.125	1.43206	157.901	12.5192	67.4901	226.125																1.40813	135.954	8.97809	54.8859	191.441
1.36626	192.547	10.4073	69.3201	263.07	1.39995	202.755	11.2768	79.898	283.846						1.39544	125.205	11.9724	48.8725	174.715	1.40163	195.682	12.1611	77.6887	274.273	1.40482	170.033	12.5424	68.0362	238.867																1.39112	142.547	8.9962	55.1208	198.3
1.37384	188.951	10.4292	69.4561	259.588	1.40088	201.691	11.2978	79.6737	282.544						1.38833	127.954	11.9967	49.0448	177.642	1.39107	201.614	12.1877	77.9197	280.46	1.42571	160.796	12.5636	67.7005	229.248																1.3947	141.662	9.01407	55.2864	197.576
1.38186	184.443	10.4492	69.2925	254.874	1.39313	207.166	11.3184	80.226	288.608						1.39581	125.742	12.0203	49.1346	175.512	1.39988	197.498	12.2117	78.101	276.475	1.42238	162.192	12.5849	67.7451	230.699																1.39044	143.455	9.03169	55.3731	199.467
1.38639	182.574	10.471	69.4054	253.118	1.41109	197.342	11.3386	79.9761	278.467						1.38718	128.845	12.0415	49.2303	178.732	1.40218	195.895	12.2354	77.9102	274.68	1.40692	169.754	12.6072	68.2834	238.83																1.39951	140.319	9.05057	55.4389	196.378
1.37589	188.177	10.4925	69.5582	258.911	1.41226	197.132	11.3594	80.121	278.402						1.38557	129.286	12.0652	49.2	179.134	1.39603	200.087	12.2576	78.3211	279.328	1.41645	165.795	12.6308	68.2656	234.839																1.41773	133.481	9.06884	55.1674	189.239
1.38215	184.968	10.5152	69.5286	255.655	1.41954	193.859	11.3796	80.2064	275.191						1.3862	129.474	12.0879	49.3522	179.478	1.39859	197.984	12.2817	77.9967	276.9	1.41224	167.362	12.6519	68.2126	236.356																1.39764	140.693	9.087	55.3187	196.639
1.38384	184.26	10.5361	69.581	254.985	1.40089	205.171	11.4014	81.0424	287.422						1.39005	128.477	12.1104	49.4641	178.59	1.41325	190.413	12.3083	77.8045	269.1	1.43242	159.239	12.6751	68.1156	228.098																1.38484	146.364	9.10503	55.6725	202.69
1.37196	190.551	10.5554	69.6995	261.428	1.42777	190.732	11.4215	80.4769	272.322						1.37538	133.661	12.1327	49.5027	183.834	1.41371	191.235	12.3325	78.2317	270.35	1.40919	170.079	12.6973	68.7973	239.673																1.41008	136.891	9.12291	55.5275	193.027
1.384	184.976	10.5785	69.8747	256.007	1.40747	201.987	11.4425	81.1168	284.291						1.3848	130.378	12.1583	49.5139	180.548	1.40862	193.081	12.3558	78.0037	271.977	1.42052	164.99	12.7188	68.6115	234.371																1.39077	144.465	9.14049	55.81	200.918
1.38857	182.355	10.599	69.7274	253.213	1.43771	186.817	11.4629	80.679	268.589						1.37309	135.392	12.1814	49.8313	185.906	1.40428	195.755	12.3808	78.2386	274.894	1.41996	165.497	12.741	68.726	235																1.38696	146.489	9.15882	56.0369	203.175
1.38801	183.548	10.6212	70.0696	254.765	1.4138	199.947	11.4853	81.5612	282.684						1.35996	139.849	12.2039	49.6359	190.188	1.40911	193.094	12.409	78.1019	272.09	1.41183	169.633	12.7643	69.0647	239.493																1.38088	148.944	9.17656	56.0655	205.674
1.37617	189.756	10.6438	70.1957	261.137	1.41026	202.054	11.5062	81.7078	284.949						1.39688	126.546	12.2267	49.587	176.769	1.41365	190.346	12.4361	77.8551	269.083	1.43069	161.356	12.7857	68.7387	230.851																1.39333	144.052	9.19476	56.0181	200.712
1.3774	189.14	10.6641	70.2116	260.522	1.40685	204.213	11.5275	81.884	287.298						1.38495	131.38	12.2497	49.9111	181.955	1.42685	94.2682	12.4891	39.8091	134.507	1.4057	172.907	12.8079	69.3406	243.056																1.38235	148.763	9.21251	56.2172	205.642
1.38538	185.27	10.6863	70.241	256.67	1.43077	191.446	11.5488	81.3505	273.916						1.37133	136.608	12.2752	50.036	187.334	1.41641	96.7316	12.5137	39.8541	137.011	1.43352	160.645	12.8292	68.8952	230.288																1.38615	147.384	9.23082	56.2504	204.296
1.37768	189.541	10.7077	70.402	261.126	1.44223	186.43	11.5702	81.3522	268.875						1.38273	132.402	12.3004	50.0082	183.075	1.42833	94.1713	12.5361	39.9208	134.508	1.40662	173.407	12.8526	69.6961	243.918																1.38637	147.278	9.24863	56.24	204.182
1.38085	187.919	10.7313	70.3937	259.487	1.4108	203.16	11.592	82.2613	286.619						1.37114	136.641	12.3261	50.0241	187.355	1.42224	95.7236	12.5632	39.9972	136.142	1.4242	165.025	12.8738	69.2322	235.03																1.3964	144.054	9.26649	56.4555	201.156
1.38133	187.754	10.7533	70.4234	259.35	1.44322	186.713	11.6129	81.6605	269.467						1.39395	128.62	12.3491	50.0247	179.29	1.41162	97.9866	12.5857	39.8917	138.32	1.39934	177.224	12.896	69.9435	247.996																1.39287	145.201	9.28438	56.3907	202.246
1.37718	190.359	10.7745	70.6133	262.159	1.43597	190.581	11.634	81.968	273.668						1.39329	129.149	12.3726	50.1422	179.943	1.41327	97.9949	12.6092	40.0679	138.494	1.42599	164.758	12.9177	69.4135	234.942																1.39396	145.017	9.30224	56.479	202.149
1.37622	191.092	10.7973	70.6975	262.984	1.43453	191.391	11.6549	82.0473	274.556						1.38444	132.474	12.3948	50.2625	183.401	1.41235	98.1152	12.6324	40.0306	138.573	1.41655	168.589	12.9395	69.4362	238.814																1.39131	146.49	9.32055	56.6645	203.813
1.37691	190.895	10.8174	70.7673	262.845	1.43492	191.384	11.6755	82.1137	274.62						1.38941	131.144	12.4422	50.4087	182.212	1.41521	97.2344	12.6565	39.9481	137.607	1.3975	178.486	12.9694	70.1119	249.434																1.38594	148.451	9.33865	56.6287	205.744
1.37531	192.205	10.8396	70.9355	264.341	1.41423	200.823	11.6958	82.0178	284.011						1.39267	130.06	12.4649	50.4226	181.131	1.41312	98.0798	12.6804	40.0899	138.598	1.40651	175.315	12.9988	70.4396	246.582																1.37641	152.809	9.35724	56.8401	210.328
1.38611	186.621	10.86	70.9009	258.677	1.42863	193.648	11.7175	81.8624	276.651						1.382	134.138	12.4871	50.5652	185.378	1.41372	97.9131	12.7039	40.0807	138.422	1.40167	177.426	13.0217	70.4398	248.693																1.38245	150.607	9.37625	56.9206	208.207
1.37499	193.105	10.8814	71.2061	265.517	1.42905	193.425	11.741	81.8643	276.415						1.37569	136.909	12.5091	50.7459	188.344	1.42733	94.9159	12.7285	40.1254	135.477	1.40569	176.101	13.0458	70.6167	247.544																1.39725	144.693	9.39409	56.8289	202.173
1.37425	193.559	10.9035	71.2377	265.999	1.38722	216.546	11.7635	82.5741	300.398						1.38605	132.992	12.531	50.6702	184.334	1.41645	97.5776	12.7546	40.1824	138.213	1.40587	176.286	13.068	70.7285	247.835																1.39082	147.403	9.41176	56.9429	205.011
1.38112	190.57	10.9243	71.4508	263.201	1.38934	214.741	11.7846	82.3427	298.349						1.39364	130.569	12.5535	50.7415	181.966	1.41008	99.3565	12.7786	40.3102	140.101	1.4126	173.24	13.0913	70.6725	244.72																1.39505	146.334	9.43057	57.1438	204.142
1.37081	196.097	10.9472	71.4896	268.811	1.38942	215.7	11.8058	82.7322	299.697						1.39137	130.942	12.5746	50.5815	182.189	1.40566	100.854	12.8032	40.4564	141.767	1.41434	172.991	13.1145	70.865	244.667																1.38299	151.117	9.44942	57.2021	208.994
1.38378	189.417	10.9715	71.5118	262.112	1.3904	215.631	11.8297	82.9138	299.814						1.39787	129.668	12.6003	50.9256	181.259	1.40941	99.9392	12.8314	40.463	140.856	1.40715	176.384	13.1365	70.9905	248.199																1.38628	150.304	9.46772	57.3883	208.364
1.37792	192.916	10.9935	71.7068	265.822	1.39579	212.377	11.85	82.8186	296.433						1.3887	132.727	12.6217	50.9175	184.318	1.40998	100.024	12.8558	40.5717	141.032	1.40416	178.156	13.1599	71.1693	250.16																1.38829	149.763	9.48566	57.4801	207.914
1.38613	188.282	11.016	71.5246	260.983	1.38346	219.557	11.8763	82.8928	303.747						1.37564	137.821	12.6707	51.0773	189.592	1.41155	99.6275	12.8791	40.5509	140.629	1.42934	166.605	13.181	70.7562	238.135																1.37636	154.562	9.504	57.4811	212.734
1.38103	191.598	11.0375	71.8069	264.602	1.38456	219.084	11.9016	82.9578	303.335						1.38239	135.913	12.6962	51.2621	187.884	1.4092	100.236	12.9061	40.5608	141.252	1.43116	166.347	13.2024	70.9462	238.069																1.38733	150.283	9.52196	57.533	208.492
1.36749	199.242	11.0645	71.9721	272.46	1.38593	218.157	11.9223	82.9139	302.351						1.40017	129.458	12.7194	51.1591	181.263	1.41933	97.8477	12.9311	40.6039	138.878	1.42465	169.13	13.2242	71.0286	240.95																1.39057	149.143	9.5397	57.5789	207.394
1.37188	197.038	11.0852	72.0533	270.312	1.3744	225.251	11.9526	82.9996	309.584						1.3745	138.878	12.7449	51.3143	190.888	1.43273	94.8146	12.9542	40.6168	135.844	1.43347	165.914	13.2455	71.1444	237.832																1.39565	147.218	9.55826	57.5844	205.465
1.36923	198.424	11.1068	72.0245	271.687	1.37972	223.04	11.9745	83.3839	307.733						1.3854	134.966	12.7671	51.3378	186.982	1.41011	100.553	12.9767	40.7876	141.791	1.40138	180.889	13.2671	71.7597	253.494																1.39687	147.07	9.57656	57.7072	205.438
1.3742	196.137	11.1286	72.1806	269.531	1.38671	218.24	11.9987	83.1063	302.634						1.37755	138.745	12.8159	51.6724	191.128	1.41749	98.5728	13.0006	40.7235	139.726	1.40836	178.195	13.2912	71.932	250.963																1.38525	151.796	9.5959	57.7807	210.276
1.40358	181.268	11.1506	72.0307	254.426	1.37509	225.109	12.0213	83.1142	309.546						1.38171	137.287	12.8378	51.714	189.691	1.42123	98.0079	13.0276	40.8361	139.292	1.42791	168.666	13.3124	71.3934	240.841																1.39602	147.838	9.61425	57.8885	206.385
1.3989	183.648	11.1737	72.1102	256.906	1.36714	230.95	12.0416	83.4454	315.742						1.37826	139.099	12.8634	51.9198	191.714	1.41045	100.836	13.0494	40.9451	142.225	1.42716	169.152	13.3338	71.4656	241.407																1.39421	148.725	9.63238	57.9624	207.354
1.37417	197.082	11.1976	72.5106	270.825	1.38767	217.461	12.0656	83.0278	301.764						1.37722	139.5	12.8888	51.9248	192.123	1.40178	103.467	13.0732	41.1089	145.039	1.41695	174.281	13.3555	71.8529	246.947																1.39063	150.424	9.65085	58.0822	209.183
1.38595	190.727	11.2196	72.4216	264.338	1.37938	222.997	12.0916	83.2952	307.599						1.39318	133.478	12.911	51.8114	185.958	1.4071	101.811	13.0969	41.0049	143.259	1.41355	176.312	13.3773	72.09	249.226																1.40533	144.092	9.66892	57.7576	202.497
1.37317	198.153	11.2427	72.7048	272.098	1.39042	216.018	12.1226	83.0677	300.357						1.37885	139.337	12.9346	52.0907	192.125	1.42013	98.4986	13.1206	40.9502	139.881	1.42141	172.824	13.3987	72.0209	245.653																1.39323	149.604	9.68812	58.1451	208.433
1.3745	197.672	11.2634	72.7983	271.701	1.40557	209.326	12.1501	83.6581	294.222						1.39237	134.592	12.9584	52.1409	187.402	1.4101	101.303	13.1443	41.1023	142.848	1.39798	184.707	13.4248	72.6366	258.217																1.41016	143.198	9.70692	58.0928	201.932
1.39239	188.416	11.285	72.7655	262.348	1.37902	224.367	12.1773	83.7176	309.406						1.39861	131.882	12.9808	51.9147	184.452	1.40666	102.521	13.1688	41.2388	144.212	1.41148	178.891	13.4489	72.7742	252.501																1.39583	149.176	9.72507	58.378	208.224
1.37338	199.109	11.3066	73.1063	273.453	1.37943	224.298	12.2029	83.7842	309.403						1.38362	137.97	13.004	52.2425	190.897	1.41548	100.5	13.1949	41.2995	142.256	1.4068	181.096	13.472	72.8238	254.766																1.41116	142.73	9.74303	58.0437	201.416
1.37673	197.042	11.3283	73.0083	271.274	1.39437	215.169	12.2297	83.5868	300.025						1.38633	137.226	13.0527	52.3307	190.241	1.40276	103.943	13.2244	41.4008	145.807	1.41926	175.046	13.4937	72.5736	248.437																1.40101	147.479	9.76126	58.4805	206.62
1.37448	198.886	11.3488	73.2419	273.364	1.38672	219.078	12.2567	83.4273	303.799						1.37879	140.728	13.076	52.6062	194.035	1.41076	102.15	13.2501	41.5132	144.109	1.38684	191.755	13.5164	73.2794	265.932																1.39716	148.927	9.77941	58.4777	208.076
1.37602	197.861	11.3701	73.1666	272.26	1.39491	215.07	12.2801	83.6691	300.003						1.38456	138.763	13.1001	52.6589	192.126	1.4161	100.802	13.2781	41.4807	142.746	1.40873	181.441	13.5451	73.3055	255.602																1.40264	147.668	9.79724	58.7973	207.125
1.37126	201.197	11.3905	73.4452	275.893	1.37483	227.79	12.3105	84.0396	313.173						1.39518	134.506	13.123	52.4847	187.661	1.40673	103.418	13.3021	41.6107	145.482	1.42081	175.574	13.5661	73.0697	249.458																1.40086	148.528	9.81532	58.8721	208.067
1.37698	198.073	11.4132	73.4334	272.742	1.37111	230.868	12.362	84.3248	316.545						1.38053	140.257	13.1456	52.6724	193.629	1.42377	99.2637	13.3256	41.6338	141.329	1.41115	180.665	13.5911	73.4317	254.946																1.39774	149.413	9.83214	58.7492	208.839
1.38238	195.517	11.4332	73.5551	270.278	1.36876	232.533	12.3834	84.3841	318.281						1.37213	144.155	13.1694	52.9275	197.799	1.40962	103.172	13.348	41.8011	145.433	1.42415	174.568	13.6124	73.2287	248.611																1.39606	150.611	9.85028	58.9751	210.262
1.37872	197.717	11.4547	73.6511	272.597	1.37258	230.24	12.406	84.4285	316.022						1.38485	139.336	13.1943	52.9227	192.959	1.43784	96.2085	13.3758	41.7028	138.333	1.43333	170.51	13.6339	73.0905	244.398																1.40207	148.725	9.86864	59.1289	208.523
1.37705	198.715	11.4743	73.6972	273.639	1.37723	226.828	12.4273	84.2399	312.395						1.37814	142.24	13.2161	53.0728	196.026	1.41559	101.514	13.3978	41.7429	143.702	1.40337	185.6	13.6585	73.9946	260.465																1.40214	147.984	9.88716	58.8471	207.494
1.37004	203.028	11.4948	73.8734	278.156	1.38293	224.014	12.4509	84.4862	309.795						1.37754	142.387	13.2393	53.0442	196.144	1.42798	98.7891	13.4244	41.8484	141.069	1.42566	174.622	13.6797	73.5143	248.951																1.3884	154.7	9.9052	59.3921	214.785
1.37025	203.448	11.5174	74.0577	278.774	1.38323	223.856	12.4741	84.4749	309.645						1.38194	141.022	13.2632	53.1607	194.884	1.41725	101.378	13.4465	41.8554	143.677	1.40486	185.355	13.7037	74.1729	260.398																1.38506	156.228	9.92311	59.4571	216.384
1.36853	204.55	11.5452	74.1046	279.933	1.38392	223.042	12.5192	84.3209	308.672						1.39537	136.354	13.2863	53.2081	190.264	1.40769	104.087	13.4702	41.9823	146.522	1.43129	172.618	13.7253	73.6414	247.066																1.3777	159.845	9.94213	59.6529	220.218
1.37058	203.917	11.5672	74.2931	279.484	1.37621	228.504	12.5405	84.6281	314.471						1.40711	132.141	13.3076	53.1323	185.937	1.40509	104.942	13.496	42.0527	147.453	1.40384	186.189	13.7473	74.3192	261.38																1.38977	154.664	9.96117	59.5872	214.947
1.37714	200.183	11.5881	74.2587	275.68	1.41378	109.398	12.5866	44.6247	154.664						1.38608	140.12	13.3291	53.3958	194.218	1.42234	100.968	13.5218	42.2003	143.61	1.41728	180.013	13.7692	74.2772	255.129																1.39627	152.121	9.97883	59.5965	212.402
1.3728	202.715	11.61	74.3058	278.288	1.41347	109.275	12.607	44.5482	154.457						1.3529	154.267	13.3538	53.6678	208.708	1.42222	101.019	13.5436	42.2094	143.672	1.42555	176.213	13.791	74.1632	251.201																1.38774	155.898	9.9966	59.7505	216.346
1.37485	202.203	11.6329	74.5325	277.999	1.42607	106.297	12.6319	44.6701	151.586						1.39385	137.938	13.3787	53.6369	192.264	1.4021	106.347	13.5666	42.2758	149.109	1.40648	185.621	13.8149	74.5846	261.072																1.39978	150.751	10.0146	59.5924	211.018
1.37026	205.151	11.6533	74.6796	281.109	1.40963	111.039	12.6537	44.8349	156.525						1.39548	137.744	13.4007	53.7881	192.219	1.41095	103.876	13.6121	42.2319	146.563	1.41681	181.172	13.8381	74.6675	256.687																1.40617	147.915	10.0324	59.4137	207.993
1.36726	206.772	11.6751	74.6409	282.71	1.41397	110.018	12.6764	44.8988	155.563						1.37794	144.595	13.4221	53.9202	199.243	1.41009	104.56	13.637	42.4241	147.438	1.41198	184	13.8609	74.9442	259.804																1.38444	157.875	10.0506	59.9809	218.569
1.3715	204.777	11.6958	74.8052	280.852	1.43165	104.743	12.6968	44.6107	149.956						1.39451	138.496	13.4459	53.9505	193.134	1.4149	103.141	13.6607	42.3435	145.935	1.43678	172.552	13.8827	74.5571	247.918																1.39728	152.698	10.0684	59.9794	213.362
1.37532	202.793	11.7178	74.8497	278.905	1.40422	112.752	12.7187	44.9183	158.328						1.38594	141.809	13.468	54.0235	196.538	1.41895	102.447	13.6873	42.4727	145.367	1.42521	177.388	13.9043	74.601	252.816																1.39557	153.686	10.0864	60.1039	214.479
1.37823	201.622	11.7397	75.0043	277.883	1.42012	108.434	12.7409	44.9218	153.989						1.38121	143.646	13.4907	54.0479	198.406	1.40557	106.537	13.7174	42.7171	149.745	1.43355	174.309	13.926	74.7573	249.881																1.39105	155.628	10.1046	60.1629	216.486
1.37755	202.254	11.7597	75.112	278.615	1.4247	107.58	12.7613	45.0624	153.27						1.38615	142.001	13.5132	54.1281	196.835	1.40994	105.069	13.7415	42.6112	148.14	1.43908	172.48	13.9475	74.9258	248.212																1.41542	145.715	10.1225	59.8811	206.247
1.38229	199.625	11.7807	75.0742	275.94	1.41315	110.815	12.7818	45.1371	156.598						1.38715	142.198	13.537	54.3466	197.249	1.41054	105.405	13.7659	42.8081	148.678	1.42618	178.592	13.9695	75.2827	254.705																1.3894	157.22	10.1401	60.5161	218.442
1.36786	208.653	11.8037	75.4569	285.407	1.40405	113.311	12.8028	45.1218	159.094						1.3797	145.391	13.5603	54.4854	200.595	1.4081	106.026	13.7902	42.8083	149.294	1.41652	183.792	13.9914	75.6944	260.345																1.39232	155.46	10.1583	60.2937	216.451
1.38111	200.76	11.8253	75.2646	277.271	1.40557	113.15	12.8246	45.2272	159.04						1.38551	143.013	13.5857	54.3917	198.146	1.42568	101.736	13.8135	42.8647	145.043	1.39853	192.341	14.0134	75.7586	268.995																1.38438	159.354	10.176	60.5348	220.607
1.37445	205.019	11.8479	75.4879	281.788	1.42503	107.611	12.8459	45.1103	153.349						1.37874	145.611	13.6076	54.4222	200.761	1.40836	106.369	13.836	42.9692	149.806	1.40997	187.323	14.0379	75.9289	264.12																1.39123	156.834	10.1937	60.6532	218.192
1.38061	202.063	11.8716	75.6436	278.969	1.41313	111.048	12.8671	45.2275	156.925						1.35811	155.007	13.6318	54.7394	210.516	1.40761	106.63	13.8648	42.9981	150.093	1.43533	175.24	14.0593	75.4754	251.527																1.39584	154.383	10.2115	60.4181	215.494
1.38094	201.699	11.8937	75.5753	278.534	1.40226	114.48	12.8882	45.3829	160.531						1.39347	140.407	13.6562	54.5515	195.653	1.39764	109.924	13.893	43.2183	153.635	1.41012	187.826	14.0823	76.1558	264.857																1.41608	146.577	10.2292	60.3307	207.564
1.37645	204.795	11.9148	75.8211	281.89	1.41553	110.788	12.9093	45.3884	156.823						1.39752	139.659	13.6802	54.7966	195.176	1.41956	103.903	13.9164	43.1438	147.496	1.4285	178.922	14.1035	75.8371	255.59																1.39071	157.589	10.2472	60.8651	219.161
1.37234	207.365	11.9355	75.9148	284.574	1.40702	113.229	12.9296	45.4304	159.316						1.39622	139.656	13.7018	54.6371	194.991	1.4122	105.628	13.9384	43.0775	149.168	1.42302	182.364	14.1253	76.293	259.507																1.40668	151.203	10.2651	60.8124	212.695
1.37145	207.978	11.9555	75.9685	285.231	1.4156	110.545	12.9505	45.2959	156.487						1.39694	140.14	13.7273	54.9194	195.766	1.41079	106.281	13.9623	43.1702	149.94	1.40733	189.986	14.1476	76.5043	267.374																1.3948	155.754	10.2835	60.7932	217.246
1.37293	207.783	11.9779	76.1894	285.273	1.42705	107.109	12.9705	45.1221	152.85						1.38445	144.675	13.7528	54.9078	200.295	1.41266	105.903	13.986	43.2404	149.604	1.41453	187.207	14.1697	76.7319	264.811																1.38719	159.613	10.3013	61.0787	221.413
1.36755	211.06	11.9982	76.2714	288.635	1.4112	112.396	12.9965	45.5561	158.613						1.39191	142.615	13.778	55.1857	198.508	1.41501	105.545	14.0097	43.3449	149.348	1.4381	175.432	14.1908	76.0433	252.29																1.3873	160.049	10.3188	61.2672	222.036
1.38304	201.84	12.0197	76.0577	279.152	1.41277	112.114	13.0175	45.6239	158.392						1.39883	140.284	13.7994	55.2505	196.234	1.41211	106.415	14.0359	43.392	150.269	1.43501	177.044	14.2127	76.1913	254.059																1.39079	158.256	10.337	61.1318	220.101
1.37948	204.418	12.0411	76.2998	281.99	1.3957	117.594	13.039	45.8459	164.126						1.38214	146.637	13.8215	55.3113	202.674	1.40954	107.164	14.0588	43.4236	151.052	1.40948	190.42	14.2384	77.0832	268.392																1.39871	154.857	10.3554	61.0513	216.6
1.38548	201.206	12.0625	76.3126	278.766	1.42221	109.651	13.0604	45.655	155.947						1.37184	151.363	13.8471	55.5016	207.646	1.41139	106.863	14.0887	43.4742	150.825	1.44231	175.082	14.2596	76.6244	252.521																1.40207	153.72	10.3728	61.109	215.526
1.39088	198.271	12.0833	76.2642	275.771	1.43064	106.778	13.0808	45.3669	152.761						1.37155	151.697	13.8711	55.6101	208.06	1.40576	108.736	14.1117	43.6452	152.857	1.43569	177.685	14.2815	76.5871	255.101																1.39553	157.489	10.3908	61.5815	219.779
1.39668	195.664	12.1044	76.3991	273.281	1.39813	117.114	13.102	45.942	163.74						1.39152	144.176	13.8957	55.7339	200.623	1.43018	102.236	14.1364	43.5354	146.215	1.42797	182.219	14.3026	77.1383	260.204																1.38236	163.223	10.4089	61.6776	225.633
1.38901	200.301	12.1257	76.6691	278.221	1.41501	111.901	13.122	45.7946	158.34						1.38188	148.101	13.9198	55.825	204.658	1.40796	108.062	14.1582	43.6139	152.147	1.4314	180.506	14.3239	77.0326	258.377																1.41526	149.24	10.4268	61.3045	211.213
1.38783	201.259	12.1465	76.8097	279.314	1.39687	117.67	13.1431	46.0121	164.37						1.38438	147.323	13.9429	55.898	203.951	1.41852	105.516	14.1817	43.6995	149.676	1.40299	194.321	14.3453	77.4038	272.63																1.40732	152.816	10.4446	61.5574	215.061
1.37493	208.405	12.1687	76.8335	286.543	1.41623	111.739	13.1673	45.867	158.249						1.38098	148.612	13.9659	55.8832	205.229	1.39994	111.041	14.208	43.9288	155.451	1.42237	186.347	14.3727	77.8399	265.055																1.41399	149.959	10.4625	61.4104	212.04
1.37758	207.99	12.1888	77.2502	286.522	1.40312	115.934	13.1897	46.0597	162.668						1.38911	146.04	13.9879	56.0974	202.865	1.4043	109.757	14.2359	43.8737	154.131	1.42486	184.318	14.3946	77.4525	262.627																1.3866	162.122	10.4803	61.9489	224.798
1.38763	201.61	12.2104	76.8895	279.759	1.39904	117.415	13.2101	46.1739	164.267						1.38786	146.87	14.0139	56.2378	203.835	1.41177	107.8	14.2613	43.9091	152.189	1.4017	197.149	14.4177	78.276	276.345																1.38721	161.983	10.4981	61.9928	224.704
1.39957	195.707	12.2316	76.9807	273.905	1.40594	115.471	13.231	46.2024	162.346						1.37879	150.769	14.0363	56.3626	207.88	1.40906	108.757	14.2856	44.016	153.245	1.40778	194.489	14.4439	78.3982	273.798																1.40101	155.834	10.5166	61.7908	218.325
1.36773	214.369	12.2527	77.5025	293.198	1.43423	107.324	13.252	45.9856	153.928						1.36953	154.182	14.0616	56.2133	211.158	1.4075	109.216	14.3092	44.0338	153.722	1.43459	181.373	14.4651	77.975	260.196																1.38231	165.161	10.5342	62.4009	228.304
1.37241	211.433	12.2737	77.4272	290.173	1.40965	114.888	13.293	46.3961	161.952						1.38779	147.209	14.0864	56.3588	204.295	1.41629	107.265	14.3342	44.1644	151.918	1.41145	193.172	14.4885	78.5772	272.652																1.38802	162.368	10.5522	62.2782	225.37
1.37332	211.77	12.2945	77.7407	290.828	1.42343	110.514	13.3123	46.158	157.309						1.37929	150.934	14.1113	56.5017	208.182	1.40624	109.828	14.3562	44.1394	154.445	1.43101	183.228	14.5102	78.122	262.201																1.39693	158.603	10.5703	62.2419	221.557
1.38513	204.734	12.3153	77.5832	283.585	1.42009	111.847	13.3322	46.3409	158.833						1.39417	145.33	14.1359	56.5679	202.616	1.40706	109.799	14.3833	44.2177	154.494	1.41216	193.404	14.5343	78.8098	273.118																1.38905	162.299	10.589	62.4163	225.441
1.37708	209.66	12.3358	77.7569	288.718	1.41962	112.189	13.3523	46.4332	159.266						1.39759	144.231	14.1594	56.6359	201.576	1.40867	109.605	14.4098	44.3148	154.398	1.4089	195.49	14.5564	79.025	275.426																1.39213	161.333	10.607	62.5386	224.596
1.37485	211.328	12.3594	77.8956	290.545	1.42182	111.285	13.3713	46.2994	158.227						1.37374	154.038	14.1834	56.8002	211.608	1.42769	104.554	14.4335	44.2632	149.27	1.4058	197.376	14.5809	79.1723	277.47																1.38874	163.226	10.6249	62.7236	226.679
1.39739	198.489	12.3804	77.6429	277.367	1.41912	112.252	13.3915	46.402	159.298						1.37659	153.239	14.2077	56.9523	210.948	1.39917	112.526	14.4549	44.4251	157.442	1.41674	192.582	14.6039	79.3604	272.838																1.40409	156.136	10.6428	62.3912	219.228
1.39159	202.208	12.3997	77.9325	281.392	1.41582	113.487	13.4311	46.5353	160.678						1.37695	153.644	14.2565	57.1585	211.56	1.42104	106.855	14.4797	44.5256	151.845	1.41576	193.65	14.6266	79.6077	274.163																1.38285	166.031	10.661	62.8174	229.595
1.37712	211.244	12.4208	78.3506	290.908	1.40586	117.166	13.4519	46.8707	164.719						1.36294	160.963	14.2816	57.6249	219.382	1.40443	111.086	14.5013	44.4397	156.012	1.4491	177.708	14.6485	78.9813	257.516																1.41083	153.989	10.679	62.5765	217.254
1.37633	211.57	12.4423	78.3026	291.189	1.40521	117.289	13.4735	46.8439	164.817						1.40479	142.93	14.3079	57.1537	200.786	1.40235	112.094	14.5241	44.6159	157.194	1.43771	183.187	14.6702	79.3333	263.369																1.39521	160.873	10.6968	62.857	224.452
1.38183	208.684	12.4621	78.3958	288.366	1.42176	112.297	13.4932	46.7169	159.66						1.37569	154.892	14.3343	57.4339	213.084	1.42817	105.032	14.5474	44.519	150.003	1.43624	184.37	14.6924	79.5729	264.801																1.39878	159.05	10.7146	62.7127	222.475
1.37474	213.043	12.4821	78.5214	292.879	1.4154	114.87	13.5157	47.0463	162.588						1.38152	152.837	14.3599	57.559	211.147	1.41374	108.983	14.5692	44.6193	154.074	1.42098	192.879	14.7145	80.2968	274.077																1.41467	152.774	10.7325	62.6685	216.126
1.37928	211.308	12.5046	78.829	291.452	1.41396	115.087	13.536	46.9776	162.728						1.37885	154.705	14.3863	57.8486	213.314	1.40395	112.201	14.5924	44.8383	157.524	1.42697	190.297	14.7363	80.3641	271.547																1.38286	167.772	10.7507	63.4853	232.005
1.39067	204.176	12.5249	78.4998	283.942	1.40306	118.534	13.5583	47.084	166.311						1.37506	156.198	14.4102	57.8134	214.781	1.40536	111.71	14.616	44.8015	156.993	1.43904	184.524	14.7581	80.1561	265.537																1.39421	162.287	10.7687	63.2475	226.262
1.37633	213.146	12.5457	78.8966	293.358	1.39728	120.628	13.5788	47.225	168.551						1.37812	155.606	14.4615	58.0712	214.445	1.41392	109.392	14.6401	44.805	154.671	1.45592	177.146	14.7798	79.9402	257.91																1.40556	157.445	10.7864	63.1503	221.3
1.36985	216.97	12.5676	78.897	297.217	1.41163	116.239	13.6025	47.1788	164.086						1.3854	152.881	14.4856	58.1422	211.801	1.42108	107.806	14.666	44.9226	153.202	1.41737	196.473	14.8027	81.0863	278.475																1.38761	165.788	10.8043	63.5223	230.05
1.37705	213.302	12.5894	79.095	293.729	1.40494	118.529	13.6233	47.3128	166.526						1.4004	147.055	14.5083	58.157	205.936	1.41273	110.014	14.6877	44.9253	155.42	1.45349	178.894	14.8243	80.2974	260.021																1.391	164.042	10.822	63.4052	228.182
1.37619	213.837	12.6097	79.123	294.281	1.41245	116.384	13.6446	47.3241	164.386						1.3914	150.668	14.532	58.2308	209.64	1.42033	107.98	14.7129	44.9189	153.367	1.458	177.298	14.8457	80.3782	258.5																1.3991	161.137	10.8396	63.5862	225.447
1.38763	207.225	12.6301	79.0429	287.553	1.40211	119.665	13.6702	47.4188	167.784						1.38648	152.951	14.5573	58.3623	212.063	1.40005	114.047	14.7361	45.1311	159.672	1.43798	186.662	14.8676	80.8869	268.416																1.38667	166.837	10.8575	63.7669	231.348
1.37268	216.928	12.6503	79.5026	297.771	1.40051	120.9	13.6965	47.7132	169.322						1.38399	154.639	14.5825	58.6208	214.018	1.39964	114.473	14.7602	45.2508	160.221	1.45438	179.498	14.89	80.7254	261.059																1.41128	155.134	10.8758	63.1103	218.938
1.38958	207.666	12.6702	79.6173	288.567	1.40518	119.129	13.7198	47.576	167.398						1.37952	156.456	14.6082	58.6103	215.834	1.40948	111.7	14.7899	45.2441	157.438	1.44917	181.913	14.9115	80.8671	263.623																1.39783	161.095	10.8936	63.367	225.183
1.38219	211.527	12.6921	79.52	292.37	1.40019	120.969	13.7432	47.7061	169.38						1.37644	158.542	14.6339	58.9075	218.224	1.42223	108.404	14.814	45.3008	154.175	1.42212	195.885	14.9335	81.7755	278.572																1.38426	167.837	10.9122	63.739	232.329
1.38976	207.972	12.7181	79.7579	289.031	1.39941	121.249	13.7663	47.722	169.677						1.38975	153.145	14.6823	58.9399	212.833	1.41274	111.147	14.8355	45.3926	157.023	1.45005	181.549	14.9552	80.864	263.254																1.40803	156.567	10.93	63.1819	220.451
1.39236	205.848	12.7395	79.4853	286.615	1.41383	116.869	13.7928	47.6836	165.232						1.40759	146.431	14.7066	58.9655	206.115	1.41901	109.672	14.8617	45.4775	155.627	1.42606	193.766	14.9772	81.6548	276.321																1.39137	164.671	10.9477	63.7042	229.117
1.37518	216.63	12.7618	79.9227	297.905	1.41799	116.073	13.8166	47.8388	164.59						1.37413	160.524	14.7283	59.2774	220.58	1.40205	114.694	14.8831	45.6127	160.807	1.46626	175.255	14.9992	80.9002	256.969																1.40095	160.424	10.9657	63.6047	224.747
1.37365	217.681	12.7826	79.9893	299.017	1.42717	113.152	13.8389	47.6861	161.488						1.38848	154.745	14.7498	59.3562	214.86	1.41323	111.236	14.9066	45.4841	157.202	1.42774	191.547	15.0206	81.0401	273.48																1.38404	168.559	10.9835	63.9765	233.292
1.37231	218.948	12.8053	80.1559	300.466	1.41275	118.058	13.8625	48.0394	166.786						1.39401	151.96	14.7715	59.122	211.832	1.41013	112.408	14.9299	45.6161	158.511	1.40414	204.614	15.0448	81.7386	287.306																1.39012	165.548	11.0011	63.8394	230.132
1.38711	210.374	12.8257	80.1306	291.812	1.3989	122.758	13.8849	48.2599	171.726						1.38744	155.447	14.7934	59.4687	215.674	1.41371	111.517	14.9588	45.6489	157.653	1.4128	199.027	15.0701	81.2363	281.186																1.4034	159.919	11.0192	63.793	224.43
1.39358	206.599	12.848	80.0234	287.912	1.41224	117.904	13.9093	47.929	166.508											1.41011	112.736	14.9847	45.7484	158.97	1.42323	193.261	15.092	80.8963	275.054																1.4004	161.631	11.0377	63.9827	226.348
1.37347	219.366	12.871	80.564	301.292	1.41525	117.796	13.9366	48.2292	166.71											1.40773	113.723	15.0079	45.8792	160.091	1.39374	208.452	15.1145	81.1062	290.529																1.40204	160.343	11.055	63.7416	224.808
1.38006	215.351	12.8945	80.5021	297.197	1.41699	117.139	13.9587	48.1702	165.985											1.40051	116.313	15.0311	46.0821	162.897	1.42089	195.425	15.1365	81.3449	277.677																1.4038	159.501	11.073	63.6959	223.908
1.37612	218.16	12.9166	80.7005	300.215	1.39728	124.178	13.9817	48.6106	173.512											1.41019	113.552	15.0547	46.0787	160.129	1.39371	209.212	15.1614	81.397	291.582																1.39319	165.272	11.0908	64.2409	230.255
1.38418	213.319	12.9375	80.629	295.273	1.4051	121.749	14.0056	48.6098	171.068											1.40159	116.157	15.0797	46.1189	162.804	1.41214	199.278	15.1852	81.2028	281.409																1.40277	160.999	11.1089	64.12	225.843
1.37864	217.18	12.9596	80.8761	299.412	1.39515	124.915	14.0287	48.6309	174.276											1.40974	114.035	15.1054	46.2302	160.759	1.40944	201.167	15.2186	81.428	283.533																1.40605	159.081	11.1268	63.8836	223.675
1.39094	210.639	12.9861	81.0246	292.986	1.41864	117.583	14.0523	48.552	166.807											1.41344	113.4	15.1288	46.3939	160.283	1.41199	200.06	15.2404	81.4963	282.483																1.38234	170.639	11.1445	64.4749	235.882
1.37962	217.244	13.0086	81.1169	299.715	1.40399	122.541	14.0778	48.7902	172.046											1.41695	112.513	15.151	46.4144	159.426	1.41326	198.924	15.2657	81.2785	281.13																1.39038	166.912	11.1623	64.4101	232.071
1.38644	212.978	13.0318	80.9723	295.281	1.41795	118.197	14.1009	48.712	167.597											1.42626	109.872	15.1726	46.3567	156.707	1.38921	212.613	15.2872	81.7733	295.365																1.40237	161.765	11.1797	64.3635	226.855
1.38033	217.648	13.052	81.4375	300.426	1.40619	122.391	14.1236	49.0034	172.104											1.41004	114.379	15.1949	46.3998	161.278	1.40276	204.757	15.3152	81.5114	287.224																1.40047	161.874	11.1976	64.1083	226.699
1.37547	220.181	13.0737	81.3045	302.853	1.42427	116.53	14.1455	48.7707	165.971											1.40497	116.343	15.2203	46.6129	163.459	1.39001	212.659	15.3365	81.9529	295.597																1.39087	166.503	11.2154	64.3396	231.584
1.37197	222.995	13.0941	81.5713	305.943	1.41215	120.672	14.1688	49.0316	170.407											1.41987	112.151	15.2459	46.6045	159.24	1.38209	215.775	15.3611	81.4404	298.22																1.39239	166.283	11.2334	64.5035	231.531
1.36944	224.684	13.1133	81.6221	307.691	1.4026	124.23	14.1919	49.2937	174.245											1.40839	115.753	15.2676	46.7711	163.024	1.41246	198.12	15.3942	80.7895	279.836																1.38612	169.392	11.251	64.6462	234.798
1.38185	217.295	13.1349	81.6182	300.269	1.41276	120.477	14.2135	49.0379	170.205											1.40897	115.568	15.2921	46.7663	162.832	1.41898	197.289	15.4218	81.7371	279.948																1.39837	164.041	11.2688	64.6137	229.389
1.38583	215.656	13.1554	81.8686	298.862	1.42178	117.653	14.2351	48.9481	167.276											1.42103	112.44	15.3188	46.8561	159.781	1.39234	105.013	15.4707	40.7111	146.213																1.38221	171.353	11.2867	64.7246	236.846
1.38414	216.369	13.1754	81.7825	299.484	1.39553	126.618	14.2608	49.3421	176.7											1.4061	117.056	15.3405	47.0283	164.592	1.39919	103.158	15.4948	40.6999	144.338																1.3808	171.515	11.3046	64.5414	236.827
1.38666	214.992	13.1965	81.7922	298.12	1.40003	125.584	14.2856	49.5061	175.821											1.40295	117.932	15.3642	47.0149	165.453	1.38083	108.042	15.5188	40.6448	149.188																1.39873	163.201	11.3226	64.3472	228.274
1.37562	222.19	13.219	82.0769	305.649	1.40269	125.141	14.3092	49.6661	175.535											1.40428	118.04	15.3894	47.2103	165.762	1.38317	107.559	15.5459	40.7139	148.773																1.39128	167.556	11.3414	64.8109	233.116
1.38442	217.07	13.2391	82.1058	300.515	1.39982	125.949	14.3316	49.6268	176.306											1.42905	111.014	15.4124	47.1502	158.644	1.38557	106.877	15.5723	40.7093	148.086																1.38578	170.129	11.3589	64.868	235.761
1.37488	223.909	13.259	82.557	307.847	1.40135	125.564	14.3568	49.677	175.96											1.40248	119.126	15.4343	47.4297	167.072	1.38305	107.787	15.5964	40.7875	149.075																1.39075	167.69	11.3771	64.7816	233.215
1.38685	216.516	13.2799	82.4158	300.275	1.39531	128.027	14.3824	49.8664	178.637											1.41332	115.999	15.4572	47.4404	163.943	1.3774	109.857	15.6203	40.9488	151.317																1.39195	166.696	11.3948	64.5884	232.033
1.37139	226.459	13.3082	82.6865	310.564	1.40467	124.693	14.4067	49.7345	175.153											1.40706	117.841	15.4811	47.4529	165.81	1.39995	103.278	15.6448	40.8231	144.584																1.39596	165.308	11.4127	64.7114	230.764
1.3795	221.263	13.3293	82.5916	305.233	1.41548	121.73	14.4325	49.88	172.307											1.41563	115.633	15.5084	47.555	163.693	1.38902	106.413	15.6669	40.9053	147.81																1.38296	171.506	11.4303	64.9099	237.186
1.38199	220.336	13.3514	82.7965	304.502	1.41139	123.49	14.459	50.0809	174.293											1.40757	118.011	15.5317	47.5924	166.109	1.3993	103.757	15.6959	40.9482	145.186																1.3898	168.533	11.4487	64.9307	234.227
1.37426	225.169	13.3715	82.8852	309.439	1.40397	125.889	14.4826	50.1222	176.745											1.40623	118.704	15.5574	47.7009	166.925	1.40513	101.735	15.7176	40.746	142.951																1.39051	168.223	11.4666	64.9379	233.915
1.38276	220.291	13.3921	82.9557	304.609	1.40397	126.04	14.5052	50.1836	176.956											1.40703	118.973	15.585	47.9127	167.398	1.40798	100.901	15.7396	40.7008	142.066																1.38615	170.688	11.4842	65.1452	236.599
1.38788	216.951	13.4129	82.8003	301.103	1.41147	123.678	14.5273	50.1817	174.568											1.4068	118.985	15.609	47.8886	167.389	1.38741	107.269	15.7637	41.0602	148.826																1.39769	164.772	11.5026	64.7906	230.3
1.38544	218.963	13.433	83.0469	303.361	1.40469	126.532	14.5503	50.4714	177.739											1.41987	115.695	15.6365	48.0781	164.271	1.38578	107.465	15.7855	40.9594	148.923																1.38745	170.333	11.5202	65.2308	236.328
1.38855	217.475	13.4548	83.1492	301.976	1.40409	126.943	14.5735	50.5584	178.24											1.40518	120.143	15.6581	48.1574	168.822	1.37331	111.842	15.8161	41.2294	153.593																1.38827	169.848	11.5377	65.1835	235.795
1.38978	216.807	13.4757	83.16	301.314	1.421	121.13	14.5955	50.3003	172.125											1.40335	121.019	15.6846	48.2933	169.833	1.38473	108.613	15.8443	41.2801	150.4																1.38315	172.156	11.5553	65.1892	238.117
1.38184	222.461	13.4972	83.5638	307.407	1.41428	123.646	14.6181	50.5163	174.871											1.40097	121.885	15.7084	48.3481	170.756	1.38378	108.917	15.8659	41.2984	150.717																1.40442	162.653	11.5736	65.0582	228.433
1.3884	218.637	13.5189	83.5592	303.556	1.39681	129.772	14.6406	50.7435	181.266											1.39989	122.845	15.735	48.5718	171.968	1.39216	106.725	15.8892	41.3606	148.578																1.40341	162.906	11.5914	64.9854	228.624
1.40221	211.287	13.5382	83.6797	296.27	1.40364	128.16	14.6715	50.9818	179.891											1.4019	122.036	15.7578	48.5195	171.082	1.39969	104.792	15.9437	41.3976	146.677																1.39315	167.854	11.6089	65.2369	233.845
1.38177	222.736	13.5584	83.6616	307.771	1.40404	127.762	14.6942	50.8831	179.382											1.3916	125.724	15.7814	48.6892	174.957	1.4037	103.823	15.9653	41.4328	145.737																1.397	166.456	11.6269	65.3417	232.539
1.38514	221.638	13.5804	83.9815	306.999	1.40642	127.402	14.7175	51.0385	179.18											1.40571	121.368	15.8044	48.7193	170.607	1.38449	109.924	15.9911	41.7533	152.188																1.3779	175.393	11.6453	65.4936	241.675
1.37302	228.944	13.6009	83.9831	314.344	1.39963	129.84	14.7407	51.1351	181.728											1.39803	123.623	15.8267	48.6537	172.829	1.37698	111.992	16.0138	41.7046	154.211																1.3958	166.824	11.6633	65.2843	232.853
1.38223	224.032	13.6225	84.2405	309.664	1.41378	125.046	14.7669	51.0277	176.788											1.40006	123.265	15.8524	48.7837	172.577	1.39443	106.406	16.0348	41.4807	148.376																1.39609	166.468	11.6807	65.1853	232.405
1.38161	224.078	13.6437	84.1102	309.587	1.40332	128.909	14.7888	51.2552	180.901											1.39315	125.855	15.879	48.9112	175.334	1.38746	109.22	16.058	41.8141	151.539																1.41168	160.031	11.6985	65.1663	225.912
1.38196	224.453	13.6651	84.3423	310.186	1.41738	124.783	14.8158	51.3568	176.865											1.40328	122.354	15.9018	48.8149	171.697	1.40092	105.526	16.0809	41.8189	147.833																1.39812	165.535	11.7163	65.1652	231.438
1.3817	224.896	13.6858	84.4396	310.738	1.40873	127.591	14.838	51.4213	179.741											1.41013	120.509	15.9259	48.9045	169.933	1.39386	106.97	16.102	41.6419	149.102																1.38777	171.016	11.7339	65.55	237.331
1.37233	230.998	13.7071	84.5802	317.005	1.40023	130.802	14.8625	51.5888	183.153											1.40469	122.277	15.9489	48.9441	171.761	1.41031	102.296	16.1231	41.5011	144.269																1.39324	169.107	11.7517	65.7475	235.607
1.38921	220.865	13.7279	84.601	306.827	1.41135	127.22	14.8861	51.5919	179.551											1.40016	123.573	15.9723	48.9151	173.022	1.37644	112.955	16.1482	41.9971	155.475																1.38389	173.191	11.77	65.7142	239.678
1.38564	223.242	13.7489	84.6992	309.333	1.39796	132.172	14.9102	51.83	184.772											1.41044	120.637	15.9972	48.9965	170.151	1.39028	108.945	16.1732	42.012	151.465																1.41893	157.448	11.7878	65.2578	223.408
1.37542	229.859	13.7702	84.8667	316.154	1.41347	126.843	14.9323	51.7205	179.289											1.39724	125.08	16.0203	49.1493	174.766	1.3888	109.701	16.1993	42.1422	152.352																1.4022	164.422	11.8055	65.3953	230.552
1.39969	215.906	13.7905	84.9639	302.2	1.40364	130.892	14.9551	52.0757	183.725											1.40547	122.216	16.0437	49.0317	171.771	1.38247	112.187	16.2244	42.3864	155.096																1.38395	173.629	11.8232	65.8848	240.293
1.38745	222.498	13.8116	84.8261	308.704	1.40651	129.471	14.9772	51.889	182.101											1.41206	120.69	16.0721	49.2151	170.421	1.40614	104.517	16.246	41.9659	146.965																1.38739	171.777	11.8409	65.7773	238.321
1.39452	218.742	13.8331	84.9494	305.039	1.40703	129.797	15	52.0813	182.629											1.39655	125.641	16.0944	49.2869	175.465	1.41145	103.321	16.2677	42.0348	145.832																1.3917	169.804	11.8585	65.7523	236.316
1.37267	232.283	13.8535	85.132	318.849	1.39575	133.995	15.0231	52.2524	187.023											1.40335	123.584	16.1198	49.3137	173.432	1.38558	111.152	16.2918	42.3434	154.01																1.38979	170.828	11.8761	65.8184	237.415
1.38207	226.527	13.8759	85.149	313.078	1.42778	123.005	15.0444	51.9143	175.624											1.42363	117.756	16.1445	49.3789	167.641	1.389	110.388	16.3175	42.4264	153.329																1.38734	172.004	11.8939	65.8566	238.629
1.39388	219.763	13.8968	85.1971	306.323	1.42148	125.297	15.0665	52.0928	178.108											1.39937	125.434	16.1671	49.5308	175.529	1.38213	112.828	16.3413	42.5935	155.943																1.38923	171.319	11.912	65.9141	238.001
1.38432	225.941	13.918	85.4272	312.774	1.3946	135.002	15.0888	52.4937	188.273											1.42546	117.659	16.1912	49.535	167.718	1.41104	104.326	16.3623	42.403	147.207																1.38918	171.248	11.9302	65.8773	237.894
1.39911	217.139	13.9381	85.3266	303.801	1.39857	134.058	15.1155	52.6599	187.49											1.40589	123.487	16.2126	49.5867	173.609	1.3986	108.223	16.3888	42.6362	151.361																1.38894	171.329	11.9483	65.8697	237.965
1.39005	222.777	13.9587	85.5139	309.671	1.40211	133.048	15.1382	52.7401	186.548											1.42351	118.485	16.2391	49.6722	168.664	1.38862	111.473	16.4143	42.8037	154.793																1.38641	172.979	11.9667	66.0645	239.82
1.39047	223.057	13.9794	85.7154	310.154	1.39495	135.807	15.161	52.8565	189.444											1.39548	127.651	16.2606	49.9322	178.135	1.36607	118.737	16.4362	42.9173	162.202																1.38716	172.541	11.9849	66.0299	239.342
1.39846	217.7	13.9999	85.3933	304.445	1.41183	130.112	15.1848	52.8305	183.696											1.39318	128.361	16.286	49.9164	178.829	1.3869	112.734	16.4647	43.0926	156.351																1.38874	171.607	12.0038	65.9448	238.318
1.38245	228.303	14.0205	85.899	315.616	1.40196	133.845	15.2076	53.0251	187.646											1.41098	122.788	16.309	49.9422	173.252	1.39747	109.439	16.4887	42.9928	152.938																1.39213	170.425	12.0217	66.0654	237.254
1.40311	216.618	14.0406	85.9859	303.94	1.40007	134.819	15.2301	53.1641	188.756											1.41361	122.383	16.332	50.0858	173.002	1.41097	104.92	16.5098	42.6356	148.038																1.40698	163.076	12.0397	65.6429	229.445
1.37471	234.525	14.062	86.4252	322.405	1.4082	132.389	15.2535	53.2738	186.429											1.39948	126.498	16.3535	49.9897	177.033	1.38744	112.966	16.5364	43.2463	156.734																1.37932	176.994	12.0577	66.3442	244.133
1.38582	227.56	14.0866	86.3846	315.358	1.40053	135.015	15.2764	53.296	189.094											1.41552	121.443	16.3772	49.939	171.905	1.37995	115.496	16.5594	43.3475	159.378																1.39446	169.843	12.0751	66.2326	236.84
1.37357	235.465	14.1079	86.5047	323.429	1.41259	130.595	15.3	53.139	184.477											1.39293	128.933	16.3996	50.0988	179.594	1.38924	112.483	16.5842	43.2616	156.265																1.39756	168.182	12.0926	66.1106	235.045
1.38153	230.403	14.128	86.4809	318.308	1.40936	132.417	15.3217	53.4507	186.623											1.39252	129.28	16.4288	50.1587	180.026	1.402	108.621	16.6052	43.1653	152.287																1.41196	161.438	12.1105	65.7814	227.944
1.38243	230.086	14.1487	86.5627	318.079	1.40359	134.334	15.344	53.4485	188.55											1.39001	130.434	16.4517	50.3138	181.304	1.40338	108.611	16.6307	43.3068	152.422																1.38832	172.31	12.1284	66.1392	239.222
1.40401	218.024	14.1687	86.7395	306.108	1.40589	134.486	15.3687	53.8048	189.072											1.39843	127.599	16.4749	50.2925	178.439	1.383	114.784	16.6517	43.434	158.746																1.38946	172.445	12.146	66.3925	239.606
1.38097	231.544	14.19	86.7832	319.756	1.40615	134.52	15.3913	53.8549	189.155											1.39485	128.838	16.4972	50.3195	179.709	1.37675	117.329	16.6776	43.6623	161.532																1.42134	157.824	12.1636	65.791	224.321
1.40322	218.254	14.21	86.6603	306.258	1.3875	141.278	15.4143	53.928	196.023											1.4055	125.583	16.5225	50.3896	176.507	1.38513	114.22	16.6993	43.46	158.209																1.38833	173.307	12.1815	66.5232	240.608
1.39814	221.529	14.2296	86.8326	309.729	1.38976	140.668	15.4389	54.0254	195.495											1.39935	127.891	16.5455	50.5227	178.964	1.37547	118.312	16.7247	43.8765	162.734																1.39919	167.968	12.1993	66.2986	235.019
1.3911	226.59	14.2495	87.2216	315.209	1.40959	133.773	15.4641	54.0156	188.566											1.40118	127.244	16.5676	50.5012	178.291	1.37929	117.205	16.7486	43.9114	161.66																1.40026	167.681	12.2169	66.3672	234.796
1.38629	229.649	14.2698	87.2935	318.359	1.41017	133.862	15.4906	54.1263	188.768											1.38834	132.051	16.5928	50.6876	183.332	1.39938	110.886	16.7722	43.7779	155.171																1.39148	171.96	12.2346	66.55	239.278
1.37882	234.649	14.2907	87.4377	323.537	1.41456	132.528	15.5126	54.1859	187.469											1.42026	121.95	16.6176	50.7249	173.202	1.41539	106.398	16.7931	43.7086	150.595																1.39014	173.061	12.2524	66.7459	240.579
1.39981	222.001	14.3101	87.3953	310.758	1.41106	133.814	15.5352	54.2297	188.82											1.40907	125.126	16.6389	50.6436	176.311	1.40382	110.086	16.8144	43.9483	154.541																1.38141	176.953	12.2704	66.701	244.445
1.38737	229.845	14.3333	87.6068	318.881	1.40758	135.628	15.5593	54.4921	190.907											1.41053	125.144	16.6664	50.8243	176.52	1.39857	112.271	16.8423	44.2281	157.019																1.37745	179.079	12.2883	66.7986	246.671
1.37856	235.618	14.3546	87.7363	324.814	1.41941	131.305	15.5812	54.3223	186.375											1.39997	128.688	16.6887	50.9143	180.159	1.40015	111.763	16.8659	44.2086	156.485																1.37999	177.67	12.3069	66.7252	245.182
1.38501	231.403	14.3752	87.6638	320.496	1.40428	137.315	15.6035	54.7273	192.829											1.40818	125.994	16.7117	50.891	177.423	1.38728	115.006	16.8873	44.0113	159.546																1.38452	175.883	12.3249	66.842	243.514
1.40286	221.424	14.3955	87.8394	310.626	1.42775	128.964	15.6249	54.4301	184.129											1.40915	125.869	16.7347	50.9593	177.369	1.38058	118.109	16.9136	44.4035	163.059																1.39259	172.147	12.3427	66.8129	239.731
1.38819	230.201	14.4179	87.9304	319.562	1.40925	135.675	15.6485	54.7398	191.2											1.40125	128.795	16.7584	51.1083	180.475	1.37733	119.268	16.9393	44.455	164.272																1.39234	171.944	12.3606	66.6945	239.405
1.38127	235.345	14.4378	88.2775	325.076	1.40528	137.535	15.6706	54.9559	193.275											1.41175	125.266	16.7858	51.0339	176.845	1.38131	118.65	16.9662	44.6913	163.893																1.38293	177.104	12.3785	67.0304	244.924
1.38626	232.005	14.4588	88.1746	321.62	1.41921	132.631	15.6924	54.8472	188.233											1.40075	129.232	16.8086	51.2367	181.021	1.39323	114.838	16.9905	44.6232	159.995																1.3922	172.589	12.3963	66.9156	240.278
1.38083	235.524	14.4792	88.243	325.218	1.41061	136.061	15.7153	55.0827	191.928											1.42953	120.358	16.8329	51.1837	172.056	1.38258	118.134	17.0167	44.6478	163.329																1.38374	176.504	12.4145	66.9462	244.236
1.38645	232.877	14.5009	88.5475	322.872	1.41896	133.409	15.738	55.1231	189.302											1.39699	131.01	16.854	51.4401	183.02	1.383	118.595	17.0402	44.8777	164.017																1.39658	170.191	12.4323	66.7298	237.685
1.38049	236.827	14.521	88.6503	326.936	1.39977	140.834	15.7605	55.4913	197.134											1.40113	129.804	16.8801	51.5159	181.873	1.38075	119.394	17.0635	44.9074	164.854																1.38733	175.271	12.4501	67.1054	243.158
1.39067	230.035	14.5408	88.4484	319.901	1.3888	145.006	15.7829	55.5509	201.384											1.41906	123.88	16.9057	51.3671	175.793	1.38262	119.1	17.0883	45.0193	164.671																1.38892	174.957	12.4685	67.2709	243.002
1.37971	237.102	14.5619	88.5733	327.13	1.40121	140.538	15.8105	55.5721	196.924											1.41158	126.674	16.9274	51.5916	178.811	1.40259	112.728	17.1096	44.8646	158.111																1.39936	169.157	12.4869	66.7968	236.711
1.38962	231.7	14.5828	88.837	321.974	1.40843	138.266	15.8336	55.6727	194.737											1.42368	123.267	16.949	51.6988	175.492	1.39317	115.809	17.1324	45	161.341																1.37988	178.871	12.5045	67.1506	246.821
1.38233	236.079	14.6035	88.7951	326.338	1.40169	140.84	15.8566	55.7618	197.415											1.4127	126.516	16.9701	51.6687	178.729	1.4002	113.834	17.1538	45.0322	159.391																1.39513	171.739	12.5217	67.0888	239.598
1.3942	228.841	14.6254	88.7896	319.051	1.40554	139.837	15.8804	55.8974	196.547											1.39826	131.626	16.9967	51.8581	184.047	1.38849	117.853	17.1769	45.2415	163.637																1.39301	172.705	12.5404	67.1068	240.579
1.40183	224.752	14.6467	88.9162	315.064	1.40267	141.013	15.9029	55.9748	197.795											1.41578	126.188	17.0195	51.9295	178.655	1.38785	118.359	17.2006	45.359	164.264																1.41494	163.07	12.5581	66.9371	230.734
1.37966	239.344	14.6684	89.385	330.212	1.40841	139.451	15.9305	56.1465	196.404											1.41015	127.903	17.0412	51.9107	180.362	1.38536	119.074	17.2245	45.3372	164.96																1.39681	170.62	12.5759	66.9441	238.324
1.38931	232.076	14.6911	88.9035	322.424	1.40396	141.029	15.9535	56.1593	197.999											1.41039	128.054	17.0633	52.0033	180.606	1.40477	112.804	17.2456	45.1432	158.464																1.38682	176.347	12.5934	67.4253	244.562
1.40067	226.514	14.7127	89.3521	317.27	1.40597	140.722	15.9764	56.3226	197.85											1.39503	133.379	17.0894	52.1175	186.067	1.39408	116.407	17.2665	45.3443	162.281																1.38832	175.884	12.6115	67.5189	244.183
1.38352	237.068	14.7322	89.4621	327.988	1.40314	142.133	15.9996	56.4792	199.433											1.40695	129.461	17.1158	52.1326	182.145	1.38628	119.72	17.2911	45.6902	165.964																1.38734	176.039	12.6292	67.4017	244.227
1.39513	230.638	14.753	89.715	321.771	1.3956	144.817	16.0221	56.458	202.108											1.40422	130.864	17.1388	52.3406	183.762	1.36868	125.839	17.3149	45.8159	172.234																1.39114	174.832	12.6483	67.6026	243.215
1.38426	237.37	14.7733	89.7449	328.582	1.40073	143.833	16.048	56.8174	201.471											1.39661	133.754	17.1619	52.4636	186.803	1.40014	115.217	17.34	45.5721	161.32																1.38171	179.379	12.6663	67.6772	247.85
1.39867	227.902	14.7936	89.4591	318.761	1.40056	143.895	16.0712	56.809	201.533											1.40119	132.271	17.1865	52.5004	185.338	1.39108	118.359	17.3613	45.7474	164.647																1.41545	163.553	12.6844	67.2218	231.501
1.38601	237.034	14.8152	90.0448	328.531	1.38632	149.56	16.0939	56.9248	207.337											1.41281	128.851	17.213	52.6401	182.043	1.38751	119.419	17.3819	45.7337	165.694																1.3909	174.927	12.7024	67.5997	243.305
1.3891	235.437	14.8356	90.1588	327.045	1.3997	144.685	16.1191	56.9954	202.516											1.4086	130.399	17.2347	52.722	183.68	1.37488	124.397	17.4068	46.0643	171.032																1.38509	178.048	12.7205	67.7717	246.613
1.37916	241.677	14.8563	90.1358	333.312	1.41996	136.896	16.1411	56.7135	194.387											1.41432	128.995	17.2589	52.8966	182.441	1.38953	119.945	17.4338	46.17	166.667																1.40098	169.554	12.7381	67.2274	237.541
1.38073	240.716	14.8768	90.1742	332.363	1.4124	140.094	16.1627	56.9769	197.868											1.42133	126.654	17.2803	52.8225	180.018	1.39299	118.974	17.4567	46.2091	165.73																1.383	179.055	12.7559	67.7754	247.634
1.40245	227.556	14.8988	90.171	319.135	1.39264	147.951	16.1855	57.2419	206.043											1.40198	133.058	17.3016	52.9123	186.544	1.3916	119.571	17.4782	46.2732	166.395																1.39134	175.386	12.7735	67.8517	244.021
1.40048	228.628	14.9195	90.1562	320.189	1.4186	138.419	16.2126	57.159	196.361											1.3985	134.794	17.3269	53.1336	188.51	1.39552	118.347	17.5028	46.2601	165.156																1.39934	171.041	12.7914	67.5396	239.345
1.39278	233.668	14.9394	90.3376	325.448	1.39915	146.22	16.2359	57.5193	204.583											1.40036	134.21	17.3558	53.1594	187.943	1.3975	117.615	17.524	46.2126	164.367																1.38519	178.744	12.8097	68.0548	247.594
1.38302	240.658	14.9589	90.6942	332.835	1.39906	146.541	16.2589	57.6355	205.019											1.42204	127.663	17.3824	53.3072	181.543	1.39572	118.807	17.5512	46.4638	165.821																1.38293	179.692	12.8278	68.0062	248.501
1.40266	228.592	14.9793	90.6421	320.636	1.40039	146.223	16.2814	57.7122	204.768											1.40463	133.106	17.4047	53.2778	186.965	1.38998	121.05	17.574	46.6504	168.257																1.38769	177.79	12.8457	68.136	246.718
1.39867	231.373	14.9985	90.8269	323.614	1.39988	146.747	16.3052	57.8498	205.429											1.40555	133.25	17.4303	53.4682	187.29	1.3792	124.51	17.5972	46.641	171.724																1.40281	170.168	12.8638	67.7883	238.714
1.39103	236.708	15.0185	91.1038	329.268	1.39489	148.779	16.328	57.8965	207.53											1.39973	135.587	17.4555	53.588	189.785	1.3865	122.242	17.6238	46.6853	169.489																1.38261	180.035	12.8817	68.0819	248.917
1.39565	234.143	15.0382	91.2023	326.783	1.40608	144.928	16.3559	58.0158	203.781											1.39863	135.921	17.4823	53.5679	190.102	1.40669	115.981	17.6446	46.6397	163.149																1.39657	173.353	12.8994	67.9731	242.099
1.4084	226.241	15.0589	91.0048	318.638	1.40235	146.23	16.3785	58.0017	205.066											1.3966	136.992	17.5087	53.7135	191.322	1.38676	123.054	17.6703	47.0236	170.647																1.38911	177.418	12.9179	68.2432	246.453
1.40362	229.271	15.0782	91.1332	321.808	1.39992	147.706	16.402	58.218	206.777											1.39397	138.673	17.5329	54.0077	193.306	1.38742	122.867	17.6925	47.0372	170.469																1.37742	182.988	12.9359	68.2491	252.052
1.41027	225.794	15.0986	91.2457	318.431	1.39814	148.793	16.4246	58.3831	208.033											1.40665	134.092	17.5555	53.9529	188.62	1.37304	127.681	17.7174	47.0427	175.31																1.38996	176.907	12.9534	68.1982	245.894
1.40612	228.524	15.1181	91.4085	321.334	1.39704	149.537	16.4468	58.5245	208.91											1.39019	140.221	17.5785	54.0855	194.934	1.3961	120.419	17.7433	47.1441	168.117																1.39527	174.395	12.9717	68.1624	243.327
1.39819	233.81	15.1395	91.6525	326.912	1.40098	148.28	16.4717	58.5987	207.738											1.39865	137.301	17.6022	54.1515	192.037	1.38207	125.385	17.7667	47.3299	173.29																1.37449	184.987	12.9898	68.4618	254.263
1.40776	228.277	15.1608	91.6833	321.359	1.38798	153.668	16.4943	58.7462	213.289											1.3993	137.286	17.6269	54.235	192.105	1.39286	121.928	17.7917	47.3405	169.829																1.39765	173.751	13.0082	68.319	242.843
1.42544	218.523	15.1804	91.6285	311.492	1.40157	148.325	16.52	58.7227	207.888											1.40149	136.516	17.649	54.2269	191.325	1.38833	123.455	17.8159	47.3735	171.395																1.39116	176.76	13.0259	68.3537	245.902
1.42028	221.832	15.2009	91.8681	315.062	1.39477	150.932	16.5413	58.7274	210.516											1.40298	136.34	17.6717	54.3638	191.282	1.384	125.405	17.8374	47.5776	173.561																1.39088	177.198	13.0435	68.4726	246.461
1.42147	221.121	15.22	91.8406	314.316	1.40589	147.261	16.5663	58.935	207.033											1.40542	135.574	17.6948	54.3877	190.538	1.38444	125.478	17.8625	47.6594	173.717																1.39875	173.058	13.0605	68.2322	242.065
1.42188	221.13	15.2399	91.9374	314.421	1.40514	147.632	16.5893	58.9624	207.443											1.41744	131.96	17.7194	54.5206	187.045	1.40451	118.186	17.8833	47.2713	165.993																1.38471	180.393	13.0784	68.5932	249.792
1.42385	220.127	15.2592	91.9502	313.427	1.4173	143.649	16.6119	59.126	203.595											1.40212	137.276	17.7408	54.6135	192.477	1.38808	124.162	17.9055	47.6159	172.346																1.40823	168.971	13.0969	68.2269	237.95
1.421	221.913	15.2798	92.0596	315.337	1.41234	144.855	16.6345	58.9072	204.584											1.41089	134.703	17.7639	54.7723	190.051	1.39058	123.832	17.9287	47.7976	172.199																1.39437	175.99	13.1158	68.6306	245.396
1.42816	218.031	15.3004	92.0125	311.383	1.41256	145.413	16.6564	59.1672	205.404											1.42341	130.616	17.7858	54.7496	185.921	1.39227	123.525	17.9509	47.8889	171.98																1.38681	179.564	13.1337	68.6601	249.022
1.42378	220.945	15.3199	92.2786	314.578	1.40235	149.72	16.6793	59.3776	209.96											1.40651	136.205	17.8074	54.7867	191.574	1.39735	121.182	17.9719	47.5967	169.334																1.39234	177.345	13.1514	68.7915	246.925
1.41744	224.992	15.3391	92.5436	318.913	1.40136	150.391	16.702	59.4955	210.752											1.39672	140.441	17.8309	55.1101	196.157	1.39033	124.521	18.0009	48.0295	173.126																1.40305	171.478	13.1683	68.3439	240.593
1.41987	223.932	15.36	92.6398	317.955	1.41294	146.48	16.7248	59.6422	206.968											1.4062	136.717	17.857	54.9562	192.253	1.40733	118.692	18.0219	47.8064	167.038																1.3879	179.638	13.1861	68.884	249.32
1.42613	220.43	15.3795	92.5833	314.363	1.41271	145.894	16.747	59.3832	206.106											1.41663	133.777	17.88	55.1637	189.512	1.39396	123.625	18.0453	48.1339	172.327																1.40467	170.785	13.2039	68.3501	239.897
1.41567	226.104	15.3991	92.5987	320.087	1.40988	147.499	16.7689	59.6214	207.955											1.40878	136.646	17.9013	55.275	192.505	1.37656	130.02	18.0669	48.3637	178.98																1.40676	170.108	13.2217	68.4389	239.301
1.40438	233.47	15.4194	92.9846	327.881	1.40563	149.763	16.7915	59.8943	210.511											1.39706	141.009	17.9254	55.3524	196.999	1.39354	124.16	18.091	48.2903	173.022																1.40179	173.042	13.2397	68.7612	242.568
1.39187	241.105	15.4402	92.9939	335.587	1.41733	145.102	16.8135	59.7319	205.657											1.41526	134.759	17.9502	55.3727	190.719	1.40876	119.095	18.1121	48.1373	167.777																1.38526	181.353	13.2577	69.0607	251.221
1.38258	247.111	15.4621	93.0127	341.65	1.40737	149.187	16.8358	59.9291	209.96											1.40734	137.643	17.972	55.4759	193.71	1.40314	121.58	18.1355	48.4543	170.594																1.39024	179.108	13.2752	69.0962	249.003
1.37198	253.729	15.4812	92.8286	348.111	1.40935	148.682	16.8578	60.02	209.544											1.40175	140.144	17.997	55.6861	196.447	1.40024	122.196	18.1563	48.3481	171.104																1.40594	171.157	13.2928	68.7157	240.637
1.39852	236.876	15.5018	92.938	331.275	1.40284	151.649	16.8792	60.2282	212.738											1.39651	141.989	18.0204	55.6989	198.29	1.39413	124.902	18.1789	48.6554	174.13																1.38339	182.623	13.3108	69.2064	252.639
1.37478	251.606	15.5216	92.7571	345.903	1.40296	152.063	16.9017	60.4138	213.338											1.40246	140.057	18.0437	55.7761	196.424	1.40168	122.102	18.1998	48.4863	171.147																1.40301	172.597	13.3276	68.781	242.155
1.38582	244.103	15.5426	92.6827	338.282	1.41084	148.911	16.9241	60.3303	210.089											1.40234	140.4	18.0669	55.8944	196.888	1.39559	125.18	18.2243	48.9442	174.7																1.38536	181.987	13.3452	69.3198	252.119
1.36988	255.882	15.5631	93.0726	350.529	1.40919	149.664	16.946	60.3921	210.905											1.39248	144.512	18.0897	56.0859	201.23	1.41684	117.808	18.2459	48.5687	166.915																1.38206	184.025	13.3637	69.4935	254.335
1.37864	248.48	15.5845	92.5514	342.565	1.4042	151.988	16.9694	60.5583	213.421											1.39895	142.059	18.1131	56.0696	198.733	1.39705	125.012	18.2688	49.0604	174.648																1.37938	185.27	13.382	69.4663	255.558
1.38189	246.679	15.6042	92.6954	340.883	1.38869	158.798	16.992	60.8086	220.522											1.40368	140.712	18.1355	56.2083	197.516	1.3861	129.07	18.2978	49.2374	178.904																1.39058	179.828	13.4025	69.4067	250.064
1.3957	238.057	15.6261	92.7248	332.257	1.40218	153.552	17.0157	60.8888	215.307											1.4277	132.379	18.1589	56.0531	188.997	1.38365	129.228	18.3189	48.9881	178.807																1.38988	180.572	13.4201	69.5969	250.975
1.38883	242.496	15.6531	92.7872	336.787	1.40337	153.502	17.0382	61.0437	215.421											1.40473	140.68	18.1812	56.3187	197.618	1.41273	120.024	18.3419	48.993	169.562																1.40325	173.549	13.4385	69.216	243.532
1.3685	257.012	15.6747	93.1141	351.72	1.40459	152.784	17.0602	60.9515	214.599											1.39456	144.748	18.2037	56.4939	201.859	1.41448	119.583	18.3631	49.0212	169.148																1.39047	180.243	13.4568	69.5846	250.622
1.36533	258.907	15.6943	93.0027	353.493	1.41575	148.665	17.0825	60.9664	210.472											1.41966	136.037	18.2298	56.513	193.126	1.39923	125.141	18.3855	49.3821	175.1																1.40107	174.433	13.4744	69.1798	244.393
1.3709	253.975	15.7155	92.641	348.175	1.40281	153.792	17.1039	61.076	215.741											1.40081	142.962	18.2516	56.6917	200.263	1.40059	124.116	18.4063	49.1551	173.835																1.41001	170.866	13.4918	69.2976	240.923
1.38633	243.867	15.7359	92.7177	338.08	1.40172	155.411	17.1273	61.5514	217.841											1.41438	138.253	18.2752	56.7024	195.543	1.39506	126.987	18.429	49.5859	177.155																1.38538	183.131	13.5102	69.7639	253.705
1.37392	252.043	15.7576	92.6847	346.287	1.41568	149.992	17.1497	61.5024	212.341											1.40047	143.553	18.2972	56.8684	201.042	1.40849	122.517	18.4499	49.4895	172.565																1.39406	179.139	13.5276	69.7915	249.731
1.38033	247.097	15.7767	92.471	341.077	1.41154	151.414	17.1723	61.4562	213.727											1.39567	145.465	18.3219	56.9415	203.022	1.41815	119.368	18.4712	49.3696	169.281																1.3855	182.632	13.5455	69.5893	253.037
1.37594	251.228	15.7972	92.8967	345.673	1.39339	159.521	17.1959	61.8361	222.275											1.40065	144.003	18.3489	57.0774	201.698	1.41907	119.339	18.4925	49.4654	169.35																1.38601	183.524	13.5634	70.0249	254.367
1.36312	260.807	15.8186	93.0895	355.51	1.40386	155.227	17.2193	61.796	217.917											1.39539	146.315	18.3722	57.2286	204.165	1.41075	121.841	18.5134	49.4915	171.888																1.38052	186.291	13.5811	70.0569	257.178
1.36321	261.886	15.8398	93.4979	357.004	1.4092	152.955	17.2417	61.725	215.544											1.40224	143.994	18.3952	57.3108	201.914	1.4023	125.886	18.5377	50.0707	176.53																1.3765	188.233	13.5994	70.0362	259.103
1.36911	257.002	15.8596	93.2921	351.864	1.4025	156.543	17.2639	62.1169	219.552											1.39786	146.327	18.4188	57.5658	204.545	1.39768	127.61	18.5634	50.1612	178.357																1.40188	175.468	13.6172	69.743	245.984
1.40677	229.788	15.8797	92.0612	323.258	1.40049	157.5	17.2866	62.1851	220.577											1.39104	148.795	18.4463	57.5317	206.979	1.37539	135.604	18.5849	50.2843	186.509																1.3886	182.182	13.6348	69.9845	252.978
1.38627	243.471	15.9011	92.5414	337.518	1.40205	157.271	17.3095	62.3274	220.502											1.39796	146.436	18.4703	57.6579	204.711	1.39701	127.891	18.6102	50.1884	178.664																1.40468	174.05	13.6527	69.667	244.484
1.3925	239.103	15.9224	92.3759	332.95	1.40208	157.287	17.3321	62.3443	220.53											1.40705	143.116	18.4936	57.644	201.371	1.4108	123.708	18.6316	50.2538	174.526																1.38674	183.356	13.6703	70.102	254.266
1.37654	251.547	15.9426	93.1814	346.266	1.39774	159.419	17.3556	62.4916	222.826											1.40562	144.153	18.5171	57.8631	202.625	1.38281	133.441	18.6555	50.4702	184.524																1.40377	174.888	13.6882	69.8363	245.502
1.3625	262.598	15.9632	93.5719	357.789	1.3982	159.6	17.3789	62.6362	223.152											1.40859	143.058	18.5403	57.83	201.51	1.40728	124.951	18.6789	50.3225	175.84																1.38406	184.897	13.7059	70.1909	255.908
1.371	256.342	15.9838	93.5237	351.445	1.39409	161.934	17.4024	62.8831	225.749											1.40632	144.311	18.5646	58.0081	202.948	1.39609	129.692	18.7023	50.7745	181.062																1.39401	180.326	13.7237	70.2509	251.377
1.39499	238.475	16.0032	92.7335	332.67	1.39101	162.794	17.4253	62.7181	226.449											1.40049	146.975	18.5898	58.1848	205.837	1.39914	128.15	18.7261	50.5616	179.299																1.38506	185.102	13.7413	70.457	256.377
1.38049	250.433	16.0231	93.7482	345.72	1.41168	154.816	17.4493	62.8507	218.552											1.3912	150.943	18.6177	58.3573	209.993	1.38142	135.299	18.7498	50.9826	186.905																1.38888	182.747	13.7595	70.2554	253.813
1.40464	232.223	16.0433	92.5484	326.191	1.39856	160.735	17.4719	63.1522	224.797											1.39948	147.731	18.6412	58.3512	206.746	1.39898	128.872	18.7716	50.8292	180.289																1.39615	179.223	13.777	70.2045	250.222
1.34244	278.729	16.0645	93.7289	374.175	1.39516	162.337	17.494	63.225	226.487											1.4021	147.334	18.6697	58.5661	206.576	1.41931	121.848	18.7929	50.5349	172.941																1.40724	174.339	13.7951	70.2246	245.337
1.37325	254.35	16.0858	93.3697	349.285	1.41534	153.652	17.5156	62.9508	217.47											1.4072	145.788	18.694	58.7062	205.154	1.3935	131.415	18.8163	51.1092	183.126																1.41692	169.149	13.8131	69.7753	239.671
1.38517	245.966	16.1066	93.2263	340.705	1.40362	158.448	17.5374	63.0586	222.4											1.39879	148.968	18.7184	58.7214	208.374	1.39225	132.131	18.8401	51.2203	183.959																1.39188	182.182	13.831	70.5881	253.577
1.37375	254.701	16.1263	93.6326	349.897	1.39665	162.124	17.5608	63.3912	226.43											1.39854	149.345	18.7461	58.8648	208.864	1.40077	129.102	18.863	51.1505	180.843																1.40339	176.351	13.8489	70.3607	247.489
1.37371	256.023	16.1473	94.1054	351.701	1.40575	158.937	17.5842	63.5798	223.424											1.4034	147.826	18.7708	58.9568	207.46	1.39649	130.87	18.8858	51.2897	182.758																1.38711	184.61	13.867	70.6442	256.073
1.36617	261.361	16.1695	94.094	357.064	1.40267	159.71	17.6064	63.4058	224.021											1.39641	150.805	18.7951	59.0893	210.585	1.41114	125.337	18.9067	50.9617	176.868																1.39006	183.426	13.8849	70.7331	254.973
1.36662	261.414	16.191	94.2253	357.254	1.39879	162.601	17.632	63.912	227.445											1.40258	148.656	18.818	59.1951	208.502	1.38498	135.825	18.9352	51.6643	188.115																1.40577	175.077	13.9023	70.262	246.118
1.36775	260.949	16.2109	94.3692	356.913	1.42271	151.972	17.6539	63.3818	216.212											1.39969	150.164	18.8454	59.3341	210.183	1.4113	126.298	18.9561	51.3699	178.245																1.38116	187.671	13.9203	70.7083	259.203
1.35516	137.481	16.2314	47.9812	186.309	1.39707	163.395	17.6759	63.9566	228.274											1.41119	145.624	18.8732	59.216	205.503	1.39141	133.738	18.9782	51.7357	186.083																1.38566	185.915	13.9387	70.8761	257.616
1.36488	133.465	16.2516	47.8814	182.164	1.41429	156.372	17.6984	63.9027	221.156											1.39817	151.643	18.9	59.6849	212.023	1.41933	123.754	18.9992	51.3308	175.648																1.39495	180.766	13.9563	70.5885	252.16
1.36058	135.246	16.274	47.9351	184.014	1.39738	163.825	17.7205	64.1763	228.925											1.39452	153.027	18.9239	59.6774	213.399	1.39958	130.367	19.0197	51.5078	182.46																1.39095	183.647	13.9743	70.9786	255.444
1.37227	130.88	16.2934	47.9242	179.603	1.41095	157.913	17.7424	64.0064	222.808											1.39948	151.363	18.9509	59.7891	211.831	1.39111	134.496	19.0437	51.9894	187.099																1.40559	175.697	13.9919	70.4871	246.958
1.3632	134.3	16.3138	47.9525	183.077	1.39822	164.26	17.7655	64.484	229.67											1.41459	146.128	18.9756	59.9324	206.711	1.40491	129.731	19.0678	51.9358	182.26																1.38624	185.955	14.0097	71.0061	257.778
1.35102	139.59	16.3351	48.1361	188.588	1.40619	159.972	17.7876	64.0777	224.951											1.4152	146.055	18.9979	59.9971	206.697	1.37231	142.321	19.0893	52.3358	195.308																1.41044	173.648	14.0279	70.5073	244.92
1.36896	132.505	16.3552	48.0777	181.394	1.39479	166.04	17.8149	64.5964	231.59											1.41085	148.109	19.0215	60.1769	208.959	1.40744	129.342	19.1143	52.1083	182.04																1.39847	179.875	14.0447	70.8697	251.55
1.35983	136.54	16.3745	48.2981	185.671	1.4009	163.542	17.8391	64.6303	229.106											1.39992	152.395	19.0444	60.2516	213.341	1.39304	134.994	19.1359	52.4406	188.052																1.4036	177.204	14.0626	70.7339	248.723
1.36222	135.271	16.3943	48.17	184.269	1.39152	167.483	17.8613	64.6304	233.055											1.39565	154.688	19.0699	60.5025	215.89	1.39951	132.76	19.1585	52.4322	185.798																1.40579	176.282	14.0805	70.7545	247.816
1.35722	137.556	16.4136	48.2989	186.694	1.39021	169.09	17.8853	65.0293	235.071											1.40185	151.982	19.0961	60.3933	213.057	1.38997	136.344	19.1809	52.5476	189.514																1.40315	177.792	14.0983	70.8879	249.469
1.36147	135.774	16.4346	48.2434	184.851	1.40255	163.995	17.9103	65.078	230.012											1.39864	154.051	19.1216	60.7101	215.462	1.41658	126.652	19.2016	52.1874	179.413																1.40088	178.879	14.1166	70.921	250.587
1.36383	135.036	16.4558	48.2986	184.165	1.4143	158.785	17.932	64.8914	224.57											1.39597	155.4	19.1474	60.8255	216.934	1.40719	129.794	19.2221	52.2673	182.645																1.39842	180.331	14.1338	71.0407	252.179
1.38504	127.159	16.4777	48.1813	176.121	1.38619	171.725	17.9544	65.3487	238.042											1.40987	150.166	19.1716	60.8707	211.716	1.40516	131.093	19.2434	52.521	184.208																1.3915	184.048	14.1514	71.2405	256.102
1.37185	132.001	16.4981	48.2804	181.086	1.39707	167.103	17.9802	65.3928	233.455											1.4104	150.183	19.1937	60.9717	211.818	1.39291	136.191	19.2657	52.8868	189.702																1.39153	183.397	14.1692	70.9893	255.203
1.35935	137.063	16.5172	48.4195	186.317	1.39106	170.093	18.0027	65.5469	236.61											1.39172	157.99	19.2163	61.1936	219.878	1.41313	128.547	19.2867	52.5254	181.653																1.39555	181.59	14.1874	71.0326	253.418
1.35257	140.23	16.5367	48.5861	189.67	1.40262	164.742	18.0246	65.4007	231.07											1.39903	154.931	19.2418	61.1168	216.752	1.41765	127.233	19.3077	52.5589	180.371																1.39779	180.83	14.2047	71.1299	252.761
1.359	137.269	16.556	48.4425	186.549	1.4113	161.238	18.0475	65.4085	227.556											1.39726	156.312	19.2676	61.4064	218.407	1.39866	134.854	19.3305	53.1436	188.614																1.39005	184.473	14.2229	71.1374	256.428
1.36254	136.183	16.5756	48.5387	185.554	1.40009	166.866	18.0763	65.7975	233.626											1.39939	155.682	19.2959	61.4661	217.86	1.40111	133.549	19.3515	52.9588	187.117																1.39905	180.254	14.2415	71.1401	252.184
1.3632	135.857	16.5978	48.5093	185.199	1.4007	166.964	18.0982	65.9655	233.867											1.40684	153.107	19.32	61.6178	215.397	1.41164	130.108	19.3731	52.9689	183.666																1.40606	176.618	14.2592	70.9367	248.337
1.37	133.72	16.6178	48.6625	183.197	1.3977	168.431	18.1209	66.0263	235.416											1.39367	158.419	19.3422	61.6615	220.784	1.40312	133.952	19.3946	53.3874	187.95																1.39739	182.157	14.2761	71.5908	254.544
1.36687	134.517	16.6383	48.5281	183.866	1.40786	164.307	18.1431	66.0817	231.322											1.39332	158.908	19.3665	61.7983	221.41	1.40001	135.064	19.4196	53.4108	189.091																1.39064	184.602	14.2931	71.2975	256.716
1.3603	137.699	16.6593	48.7672	187.313	1.42363	157.386	18.1655	65.7888	224.06											1.39412	159.103	19.3891	62.0109	221.809	1.39801	136.047	19.443	53.5253	190.194																1.40688	177.725	14.3105	71.5332	250.039
1.35268	141.263	16.6792	48.956	191.084	1.39805	169.487	18.2098	66.4992	236.951											1.3956	158.519	19.4122	62.0237	221.23	1.41783	128.979	19.4639	53.3059	182.87																1.40423	178.742	14.3269	71.4555	250.995
1.35513	139.766	16.6992	48.7819	189.401	1.42437	157.544	18.2313	65.9657	224.401											1.39099	160.851	19.4362	62.1626	223.743	1.40035	135.719	19.4898	53.7112	190.055																1.38228	190.158	14.3442	71.8547	262.851
1.35652	139.179	16.7186	48.7759	188.8	1.40267	167.801	18.2534	66.6195	235.369											1.40761	154.479	19.4624	62.2663	217.446	1.39091	139.558	19.5128	53.9176	194.113																1.40312	178.815	14.3613	71.2973	250.899
1.36086	138.188	16.7382	49.0227	188.054	1.40922	164.899	18.2751	66.5478	232.38											1.40863	154.481	19.49	62.4161	217.607	1.42252	128.111	19.5341	53.5456	182.24																1.38952	186.291	14.3777	71.7356	258.854
1.36061	137.939	16.7603	48.8936	187.68	1.39357	172.213	18.2975	66.8088	239.991											1.40404	156.787	19.514	62.6312	220.135	1.39308	138.953	19.5563	53.9833	193.572																1.39049	185.445	14.3942	71.5934	257.858
1.36136	137.709	16.7799	48.9261	187.472	1.39092	173.636	18.3193	66.903	241.513											1.40272	157.44	19.5411	62.6839	220.845	1.40482	134.394	19.5774	53.794	188.798																1.38799	186.711	14.4104	71.6107	259.152
1.35954	138.704	16.8002	49.023	188.573	1.41127	165.179	18.3485	66.9901	233.112											1.39384	161.244	19.5671	62.7757	224.749	1.3941	139.542	19.6055	54.358	194.536																1.4089	176.167	14.4271	71.255	248.201
1.37187	134.119	16.8222	49.0506	183.994	1.39955	170.839	18.3721	67.277	239.097											1.41387	153.619	19.5933	62.8823	217.198	1.42259	129.284	19.6266	54.051	183.918																1.40337	179.773	14.4439	71.7206	252.289
1.35475	141.018	16.8429	49.1578	191.043	1.3965	172.619	18.3939	67.474	241.062											1.4191	151.987	19.6165	63.0076	215.684	1.40694	134.736	19.6477	54.2225	189.566																1.40198	179.882	14.4605	71.5142	252.191
1.35757	140.058	16.8628	49.2254	190.139	1.40921	167.181	18.4161	67.4759	235.593											1.3957	161.657	19.6398	63.2324	225.625	1.3831	144.31	19.6695	54.6276	199.594																1.40159	180.34	14.4769	71.6193	252.763
1.35765	140.084	16.8847	49.2412	190.186	1.39069	175.475	18.4383	67.568	244.032											1.40283	158.572	19.6637	63.1662	222.45	1.40057	138.196	19.6961	54.7278	193.553																1.40076	180.79	14.4941	71.6619	253.244
1.37756	132.781	16.9057	49.3152	182.913	1.42462	160.357	18.4623	67.1887	228.448											1.39804	160.899	19.6892	63.3161	224.944	1.39525	139.382	19.7175	54.4579	194.472																1.40521	178.634	14.5116	71.601	251.018
1.3542	141.708	16.9257	49.3298	191.901	1.41691	164.606	18.4851	67.6956	233.232											1.40344	158.902	19.7164	63.3913	223.01	1.40074	138.504	19.7426	54.8721	194.007																1.38665	188.867	14.5288	72.1957	261.892
1.38689	128.79	16.9471	49.0338	178.618	1.39275	175.671	18.5074	68.0051	244.665											1.39737	161.879	19.739	63.6219	226.206	1.42221	130.72	19.7637	54.6006	185.912																1.38404	190.075	14.546	72.1554	263.072
1.35798	140.42	16.9671	49.4098	190.689	1.40916	168.168	18.5292	67.8584	236.976											1.42444	151.611	19.7635	63.6635	215.96	1.3881	143.925	19.7883	55.1984	199.783																1.38524	189.55	14.5626	72.1822	262.572
1.35518	141.628	16.9871	49.4421	191.932	1.3898	177.742	18.5517	68.277	247.025											1.39676	162.834	19.7862	63.8704	227.44	1.39392	142.089	19.8111	55.3264	198.061																1.39229	185.688	14.5793	72.0184	258.531
1.36044	139.353	17.0068	49.3785	189.581	1.39962	173.313	18.5742	68.2815	242.572											1.40158	161.025	19.8149	63.9288	225.689	1.41395	134.392	19.832	55.023	190.024																1.38865	187.72	14.5963	72.1326	260.677
1.3569	140.978	17.0276	49.4462	191.293	1.39632	175.204	18.5969	68.4506	244.641											1.39585	163.88	19.846	64.1212	228.751	1.41626	133.448	19.8531	54.9492	188.998																1.39413	185.002	14.613	72.0865	257.916
1.35629	141.763	17.048	49.6426	192.271	1.41253	167.364	18.6188	68.1014	236.406											1.4149	156.361	19.8721	64.164	221.235	1.41854	132.883	19.8738	55.015	188.5																1.40401	180.513	14.6294	72.1288	253.442
1.35989	140.05	17.0698	49.5488	190.452	1.39513	176.245	18.6437	68.6297	245.885											1.3995	162.909	19.8955	64.3424	227.99	1.42441	131.278	19.895	55.1209	186.993																1.38554	189.525	14.6458	72.2299	262.594
1.35859	140.917	17.0899	49.6719	191.449	1.39476	176.668	18.6662	68.7323	246.41											1.40347	161.565	19.9228	64.4537	226.751	1.41131	136.073	19.9159	55.3541	192.041																1.40494	179.677	14.6627	71.9666	252.436
1.36335	139.104	17.11	49.6934	189.647	1.41266	168.502	18.6882	68.5889	238.037											1.39695	164.684	19.946	64.6465	230.055	1.38133	148.269	19.9378	55.861	204.809																1.38744	189.12	14.6793	72.4336	262.392
1.36161	139.781	17.1347	49.687	190.328	1.38908	180.302	18.7104	69.1408	250.454											1.39833	163.963	19.9718	64.5865	229.274	1.40165	140.388	19.9641	55.7495	196.776																1.38408	190.382	14.6958	72.2826	263.505
1.36496	138.666	17.1539	49.761	189.274	1.38897	180.257	18.7332	69.0893	250.371											1.42308	154.714	19.9965	64.7562	220.17	1.41579	135.241	19.9867	55.6163	191.472																1.38833	188.588	14.7126	72.4006	261.822
1.35059	144.618	17.1744	49.8162	195.32	1.39012	180.133	18.758	69.2607	250.407											1.40243	163.026	20.0189	64.8773	228.633	1.38634	147.013	20.0081	56.1288	203.81																1.3874	188.939	14.7297	72.3645	262.133
1.36395	139.016	17.1937	49.7492	189.61	1.40634	172.398	18.7809	69.0837	242.45											1.41442	158.529	20.0475	64.974	224.227	1.39845	142.555	20.0329	56.1499	199.355																1.3898	188.508	14.7468	72.6548	261.99
1.3556	142.605	17.2133	49.8409	193.316	1.3885	181.032	18.8039	69.2974	251.364											1.40151	164.045	20.0732	65.1165	229.911	1.39345	144.665	20.0539	56.2625	201.583																1.40147	181.695	14.7621	72.1266	254.64
1.36024	140.854	17.2335	49.8813	191.595	1.39906	176.661	18.8291	69.4858	247.16											1.39879	165.501	20.0993	65.2557	231.5	1.39958	142.651	20.0765	56.3508	199.651																1.37424	196.966	14.7791	72.8454	270.678
1.36046	140.886	17.2556	49.9186	191.67	1.41318	169.528	18.8507	69.095	239.573											1.40475	163.141	20.1252	65.3214	229.171	1.39457	144.695	20.098	56.4351	201.787																1.38509	191.172	14.7959	72.7779	264.791
1.3689	137.532	17.2753	49.8966	188.267	1.41001	172.093	18.873	69.5916	242.652											1.41795	158.309	20.1486	65.4824	224.474	1.39504	144.935	20.1215	56.5952	202.191																1.39596	184.808	14.8123	72.3652	257.985
1.36995	137.661	17.2948	50.0891	188.589	1.40944	171.896	18.8948	69.4158	242.278											1.40037	165.699	20.1744	65.5844	232.039	1.41235	137.728	20.1424	56.1731	194.521																1.40836	179.061	14.8291	72.3369	252.181
1.36721	138.503	17.315	50.0163	189.363	1.40174	176.421	18.9163	69.8854	247.296											1.40375	165.045	20.2009	65.8869	231.682	1.39918	144.014	20.1664	56.8319	201.502																1.40038	183.008	14.8448	72.4518	256.281
1.36005	141.928	17.3336	50.2354	193.03	1.40089	176.829	18.9387	69.8832	247.717											1.41855	159.105	20.228	65.8678	225.699	1.41162	138.734	20.1875	56.4796	195.839																1.39022	188.722	14.8614	72.8067	262.365
1.36541	139.569	17.3544	50.1481	190.569	1.39991	177.94	18.9621	70.1421	249.099											1.41228	161.817	20.2607	65.9732	228.531	1.40908	140.086	20.2078	56.6823	197.392																1.39218	186.972	14.8791	72.5035	260.3
1.39346	129.577	17.3736	50.1941	180.56	1.39539	180.345	18.984	70.288	251.652											1.41374	161.508	20.2833	66.0907	228.33	1.37859	152.834	20.2306	57.1663	210.696																1.40436	181.292	14.8948	72.4936	254.6
1.35261	145.629	17.3957	50.4537	196.979	1.39414	181.243	19.0069	70.3975	252.678											1.41039	162.602	20.3051	66.0241	229.333	1.39712	145.785	20.2547	57.2355	203.679																1.39226	187.306	14.9117	72.6433	260.779
1.35309	145.536	17.4155	50.4978	196.923	1.39112	182.686	19.0289	70.4242	254.138											1.38999	171.887	20.3291	66.2508	238.921	1.38475	150.859	20.277	57.3556	208.901																1.40847	179.057	14.9286	72.3508	252.197
1.35206	145.823	17.4365	50.4428	197.161	1.39373	182.015	19.0526	70.6317	253.68											1.39739	168.631	20.3528	66.2704	235.644	1.40435	143.12	20.2978	57.221	200.991																1.38387	192.494	14.9461	73.0408	266.386
1.35594	144.11	17.4571	50.4126	195.404	1.41875	170.261	19.0747	70.3411	241.558											1.41652	161.346	20.3765	66.509	228.549	1.40173	144.473	20.3201	57.3813	202.512																1.41312	177.721	14.9625	72.6345	251.141
1.36697	139.702	17.4814	50.4045	190.968	1.39087	183.553	19.0972	70.7096	255.298											1.39725	169.313	20.3993	66.4906	236.572	1.40711	142.333	20.3412	57.3011	200.278																1.39146	187.994	14.9784	72.7503	261.586
1.34837	148.127	17.5013	50.6976	199.73	1.39116	184.59	19.1219	71.1545	256.795											1.39951	168.588	20.4224	66.6196	235.94	1.39981	145.69	20.3625	57.5865	203.939																1.38448	192.392	14.9955	73.1173	266.363
1.36545	140.347	17.5204	50.4381	191.637	1.40677	176.773	19.1442	70.905	248.679											1.40964	164.549	20.4452	66.6901	231.955	1.40043	145.981	20.3845	57.7902	204.436																1.39545	186.202	15.0114	72.8043	259.835
1.35726	144.226	17.5413	50.6395	195.752	1.41244	173.911	19.1661	70.7542	245.639											1.39466	171.513	20.4716	66.9488	239.202	1.40434	144.498	20.4068	57.7689	202.925																1.38219	193.619	15.0279	73.1434	267.618
1.35397	145.733	17.5611	50.7002	197.318	1.38391	188.896	19.1938	71.4447	261.415											1.42141	160.382	20.4951	66.8957	227.969	1.40657	143.426	20.4276	57.6633	201.738																1.39649	187.035	15.0441	73.3271	261.193
1.35436	145.671	17.5813	50.7327	197.291	1.40503	179.041	19.2209	71.5006	251.559											1.40029	169.555	20.5177	67.1094	237.427	1.41174	142.133	20.4503	57.8744	200.655																1.39902	185.209	15.0617	73.0909	259.11
1.37163	139.09	17.601	50.847	190.78	1.40373	179.339	19.2433	71.3858	251.743											1.4083	166.113	20.5432	67.1107	233.937	1.39057	150.327	20.471	58.0413	209.04																1.38488	192.352	15.0781	73.1822	266.385
1.35237	147.193	17.6226	50.9598	199.058	1.40364	179.803	19.2652	71.5709	252.378											1.41325	164.353	20.5703	67.1738	232.272	1.40827	143.439	20.4919	57.9175	202																1.38443	193.211	15.0947	73.4234	267.487
1.34873	148.962	17.6416	51.044	200.911	1.41069	177.185	19.2869	71.7783	249.953											1.41989	162.002	20.5929	67.2898	230.025	1.39251	150.202	20.5144	58.276	209.158																1.38791	191.032	15.1109	73.2574	265.134
1.34297	151.822	17.6617	51.145	203.892	1.42378	170.237	19.3087	71.188	242.38											1.40262	169.129	20.6177	67.3253	237.224	1.41351	141.991	20.5352	58.0749	200.705																1.38905	190.733	15.1273	73.3609	264.937
1.35839	144.462	17.682	50.8955	196.236	1.41325	176.26	19.3318	71.8315	249.099											1.39757	171.918	20.6431	67.5706	240.269	1.39513	150.007	20.557	58.5921	209.28																1.38828	191.06	15.144	73.3441	265.245
1.3658	141.421	17.7026	50.8697	193.152	1.38853	189.312	19.3536	72.4947	262.866											1.39465	173.566	20.6675	67.7183	242.065	1.39868	148.618	20.5798	58.5764	207.869																1.38842	191.06	15.1607	73.3719	265.273
1.36507	142.111	17.7228	51.0118	193.991	1.39263	186.965	19.3779	72.3364	260.374											1.40226	170.262	20.6961	67.7478	238.752	1.41813	140.652	20.6002	58.179	199.463																1.37958	196.242	15.1771	73.6229	270.733
1.35561	146.021	17.7436	51.038	197.947	1.39847	184.373	19.4001	72.4309	257.84											1.39593	173.811	20.7201	68.0313	242.629	1.3915	152.247	20.6217	58.9116	211.851																1.38703	192.341	15.1936	73.5895	266.782
1.36178	143.729	17.7648	51.1154	195.726	1.39665	185.43	19.4229	72.4984	258.982											1.3922	175.421	20.7487	68.0048	244.221	1.42005	140.504	20.6428	58.3826	199.523																1.40215	183.655	15.2104	73.0519	257.513
1.3401	153.509	17.785	51.2772	205.718	1.4032	181.692	19.4449	72.242	254.951											1.40365	170.763	20.7754	68.1603	239.692	1.41067	144.915	20.6645	58.8558	204.428																1.38696	192.446	15.2269	73.621	266.916
1.36355	143.035	17.8051	51.1308	195.035	1.40564	181.578	19.4684	72.6451	255.233											1.41168	167.763	20.7987	68.3021	236.828	1.43174	136.753	20.686	58.4207	195.795																1.38719	192.694	15.2443	73.77	267.303
1.34749	150.322	17.8251	51.3223	202.559	1.41389	177.667	19.4902	72.5434	251.201											1.40059	172.543	20.8226	68.3348	241.662	1.4291	138.044	20.707	58.6098	197.279																1.37564	198.668	15.2608	73.7508	273.296
1.35633	146.672	17.8447	51.3711	198.936	1.38725	191.774	19.5131	73.1762	266.038											1.40506	170.515	20.8472	68.3035	239.583	1.40446	147.773	20.7281	59.1029	207.542																1.39245	189.287	15.2791	73.4552	263.571
1.35795	146.147	17.8642	51.4278	198.461	1.40386	183.86	19.5352	73.2253	258.115											1.39832	173.931	20.871	68.533	243.21	1.4163	143.736	20.7492	59.1887	203.573																1.40812	181.587	15.2959	73.3069	255.697
1.3574	146.326	17.8837	51.4081	198.623	1.39796	186.751	19.558	73.265	261.071											1.39991	173.534	20.8949	68.6247	242.932	1.39632	151.873	20.7712	59.4998	212.063																1.38843	192.181	15.3125	73.8079	266.831
1.35149	149.314	17.9035	51.5746	201.796	1.39028	190.226	19.5802	73.169	264.467											1.38951	178.78	20.9207	68.8506	248.417	1.40062	149.602	20.7924	59.2571	209.536																1.41222	179.648	15.3293	73.2698	253.703
1.3568	146.685	17.923	51.4477	199.023	1.39957	186.501	19.604	73.4774	261.02											1.39644	175.622	20.9469	68.8254	245.245	1.39817	151.756	20.8164	59.7334	212.18																1.38268	195.701	15.3457	74.028	270.591
1.35355	148.477	17.9429	51.591	200.97	1.41279	179.652	19.6257	73.1572	253.81											1.4103	169.872	20.9697	68.9673	239.572	1.40744	147.876	20.8372	59.5858	208.127																1.38528	193.896	15.3612	73.8348	268.601
1.36025	145.832	17.9623	51.6459	198.367	1.39604	188.619	19.6479	73.6326	263.318											1.40475	172.653	20.9931	69.0953	242.534	1.4026	150.485	20.8595	59.8995	211.07																1.38416	194.379	15.3775	73.8157	269.051
1.35587	147.536	17.9821	51.606	200.039	1.40322	185.589	19.6727	73.7836	260.422											1.40326	173.558	21.0166	69.2043	243.548	1.40783	147.868	20.8811	59.6342	208.173																1.39151	191.265	15.3937	74.0347	266.147
1.34782	151.926	18.0016	51.9201	204.768	1.39857	188.045	19.6951	73.8984	262.995											1.4081	171.725	21.0406	69.2948	241.807	1.4053	149.653	20.9016	59.9786	210.307																1.38962	192.155	15.4102	74.018	267.021
1.35144	149.882	18.0215	51.7627	202.556	1.38627	194.943	19.7182	74.1904	270.243											1.39167	179.257	21.0646	69.3827	249.467	1.39831	153.5	20.9242	60.444	214.64																1.38647	193.211	15.4288	73.7842	267.88
1.36384	144.474	18.0434	51.6822	197.04	1.40028	188.053	19.7429	74.2039	263.327											1.39126	179.488	21.0892	69.4065	249.714	1.39757	152.566	20.9458	59.964	213.221																1.39358	189.439	15.4457	73.7205	263.997
1.35766	147.56	18.0642	51.8728	200.337	1.39408	191.567	19.7652	74.4145	267.059											1.40189	175.154	21.1136	69.5909	245.546	1.41332	147.485	20.9679	60.2975	208.443																1.39515	188.946	15.4624	73.8299	263.608
1.35766	147.509	18.0835	51.8606	200.267	1.4071	184.841	19.7877	74.197	260.089											1.40283	174.734	21.1409	69.5915	245.123	1.43685	138.897	20.9881	60.0649	199.575																1.399	186.57	15.4784	73.6133	261.011
1.36378	145.423	18.1039	52.0113	198.325	1.4085	183.956	19.8096	74.1208	259.103											1.40016	176.483	21.1663	69.8151	247.105	1.43844	138.128	21.009	59.9428	198.69																1.37728	199.018	15.495	74.2096	274.103
1.35376	149.844	18.1249	52.0904	202.852	1.40219	188.217	19.8322	74.6377	263.916											1.40292	175.244	21.1898	69.8252	245.853	1.41768	145.984	21.0293	60.3227	206.959																1.39446	189.576	15.5119	73.9522	264.358
1.36003	147.083	18.1447	52.059	200.038	1.40261	188.46	19.854	74.8254	264.336											1.39917	177.472	21.2177	70.0303	248.314	1.40307	152.952	21.055	60.9524	214.603																1.39292	191.236	15.5287	74.3038	266.377
1.36413	145.453	18.1733	52.0645	198.418	1.41646	180.791	19.8754	74.2819	256.082											1.39791	178.457	21.2427	70.1914	249.467	1.40144	153.671	21.077	60.9955	215.361																1.38937	192.388	15.5453	74.0642	267.297
1.34481	154.522	18.1929	52.3383	207.803	1.39203	194.495	19.8972	75.1568	270.743											1.40053	177.494	21.2688	70.2776	248.585	1.40129	153.673	21.0981	60.9756	215.341																1.39257	191.612	15.5616	74.379	266.833
1.36615	144.931	18.2134	52.1865	197.997	1.4127	184.109	19.9192	74.9543	260.09											1.39336	181.29	21.294	70.4829	252.602	1.41588	147.299	21.118	60.6029	208.557																1.39148	192.135	15.5782	74.3739	267.353
1.34831	153.437	18.2338	52.5098	206.881	1.39709	192.122	19.9415	75.2187	268.412											1.39215	182.129	21.3231	70.5876	253.551	1.44007	138.909	21.1396	60.5064	200.039																1.39253	191.461	15.5949	74.3145	266.617
1.35156	151.689	18.2538	52.4034	205.017	1.41544	182.94	19.9635	74.9686	258.941											1.396	180.522	21.3472	70.6634	252.009	1.41693	147.25	21.1607	60.7323	208.643																1.39357	190.901	15.6113	74.292	266.035
1.35597	149.914	18.2727	52.4586	203.278	1.41648	182.745	19.9855	75.0907	258.855											1.39226	182.636	21.3727	70.7994	254.277	1.40856	151.307	21.1843	61.1394	213.125																1.39298	191.572	15.6287	74.4407	266.857
1.35439	150.743	18.2924	52.5027	204.164	1.40868	187.014	20.0082	75.3665	263.443											1.39754	180.292	21.3994	70.8723	251.964	1.41616	148.586	21.2087	61.1747	210.422																1.42065	177.452	15.6452	73.8603	252.097
1.35061	152.61	18.3128	52.5733	206.116	1.39752	192.983	20.0304	75.637	269.697											1.40365	177.789	21.4234	70.9551	249.555	1.39832	157.393	21.2338	61.9829	220.086																1.39115	192.749	15.6627	74.5497	268.144
1.35531	150.49	18.3318	52.5568	203.961	1.43683	173.988	20.0522	75.0303	249.991											1.40504	177.477	21.4497	71.0782	249.361	1.42488	146.45	21.255	61.5679	208.674																1.41745	179.116	15.6799	73.9854	253.887
1.36669	145.779	18.3516	52.571	199.235	1.40277	190.808	20.0739	75.7848	267.66											1.39673	181.652	21.4748	71.2364	253.719	1.41937	148.26	21.2759	61.514	210.436																1.38576	195.583	15.6966	74.5891	271.03
1.35686	150.028	18.3706	52.6267	203.567	1.40926	187.654	20.0963	75.7512	264.453											1.39941	180.87	21.5009	71.4106	253.112	1.42686	145.941	21.2967	61.6374	208.237																1.3878	195.154	15.7136	74.825	270.835
1.35482	151.046	18.3916	52.6701	204.641	1.38677	200.425	20.118	76.4042	277.944											1.39495	183.018	21.5245	71.4505	255.301	1.38181	165.337	21.3181	62.3764	228.463																1.41033	182.6	15.7306	74.1252	257.526
1.35683	150.269	18.4122	52.7072	203.889	1.39465	196.006	20.1413	76.253	273.359											1.41326	174.985	21.5495	71.5187	247.3	1.40208	156.794	21.3441	62.3347	219.838																1.39893	189.344	15.7474	74.7018	264.88
1.35708	150.32	18.4317	52.7628	203.996	1.40737	189.518	20.1638	76.1439	266.722											1.39609	183.12	21.574	71.6955	255.653	1.41845	150.345	21.3646	62.238	213.257																1.38667	195.958	15.764	74.9073	271.729
1.35816	149.818	18.4515	52.7521	203.477	1.39345	197.439	20.1859	76.5717	275.12											1.39833	182.299	21.5989	71.7799	254.913	1.39232	161.39	21.3879	62.5861	224.708																1.38635	196.339	15.7809	75	272.195
1.35231	153.018	18.4718	52.9804	206.928	1.41574	185.604	20.2073	76.126	262.766											1.40063	181.448	21.6231	71.8837	254.142	1.4095	154.087	21.409	62.4062	217.185																1.38685	196.16	15.7973	75.021	272.043
1.36042	149.594	18.4932	53.0015	203.512	1.39394	196.955	20.2293	76.4897	274.544											1.41172	176.947	21.6493	72.0476	249.801	1.38526	164.937	21.4299	62.8004	228.479																1.40813	184.807	15.8139	74.6183	260.233
1.35974	149.902	18.5125	53.016	203.828	1.39655	196.901	20.2533	76.9861	274.983											1.40084	181.897	21.6724	72.0816	254.81	1.397	160.476	21.4533	62.9887	224.186																1.39913	190.185	15.8304	75.0785	266.095
1.3613	149.176	18.5324	52.9901	203.073	1.42788	180.849	20.2751	76.372	258.23											1.40221	181.717	21.6967	72.2883	254.807	1.41943	150.612	21.4737	62.5001	213.783																1.39262	193.838	15.847	75.2561	269.942
1.35544	152.436	18.5525	53.2548	206.618	1.40787	192.046	20.2976	77.2508	270.376											1.40305	181.494	21.7207	72.3261	254.644	1.39535	161.9	21.4963	63.2741	225.906																1.40908	184.602	15.8646	74.7031	260.119
1.35876	150.986	18.5726	53.2517	205.154	1.41542	187.45	20.32	76.8266	265.322											1.39382	186.368	21.7444	72.5529	259.762	1.41804	151.804	21.5163	62.7881	215.264																1.39467	191.932	15.8811	74.9039	267.681
1.35866	151.411	18.5924	53.3827	205.716	1.41997	185.423	20.3422	76.8374	263.296											1.41189	178.422	21.7731	72.673	251.912	1.4209	151.215	21.5369	62.9705	214.862																1.38405	198.263	15.8981	75.2684	274.404
1.35725	151.785	18.6117	53.3036	206.01	1.40466	194.241	20.364	77.5177	272.842											1.40349	182.302	21.796	72.7317	255.859	1.39924	160.551	21.5582	63.3743	224.649																1.38354	198.146	15.9143	75.1277	274.142
1.35322	153.945	18.6308	53.4419	208.321	1.383	206.739	20.3863	78.0268	285.919											1.40857	180.599	21.8208	72.9591	254.386	1.39072	164.764	21.5793	63.6358	229.141																1.41204	183.565	15.9307	74.8226	259.201
1.34997	155.326	18.6512	53.416	209.685	1.40375	195.125	20.4084	77.6971	273.907											1.39378	187.678	21.8438	73.0451	261.581	1.39081	164.876	21.6012	63.6896	229.311																1.39539	191.384	15.947	74.8317	267.055
1.36088	150.402	18.6712	53.3617	204.679	1.40163	196.59	20.4307	77.8499	275.546											1.39464	187.49	21.8697	73.1375	261.481	1.40152	160.487	21.6245	63.7154	224.926																1.3891	195.996	15.9641	75.408	272.259
1.34899	156.456	18.6906	53.6521	211.057	1.3954	200.398	20.453	78.1241	279.635											1.39451	187.973	21.8938	73.3147	262.129	1.40238	160.498	21.6461	63.8559	225.079																1.40442	187.527	15.981	75.0221	263.366
1.35519	153.774	18.7113	53.6839	208.394	1.39356	201.798	20.4763	78.2707	281.217											1.38982	190.766	21.9214	73.4947	265.13	1.41539	154.468	21.6664	63.4792	218.632																1.42205	179.102	15.9969	74.7973	254.691
1.3536	154.322	18.731	53.63	208.889	1.41037	192.774	20.5026	78.0091	271.882											1.41496	178.991	21.9464	73.4583	253.264	1.40641	158.831	21.6871	63.8429	223.382																1.40579	188.064	16.0136	75.4966	264.378
1.35318	154.867	18.754	53.7469	209.564	1.4083	194.265	20.5245	78.2306	273.583											1.39394	189.076	21.9691	73.6271	263.562	1.39759	163.258	21.7089	64.1732	228.168																1.38478	198.043	16.03	75.3414	274.246
1.35543	153.947	18.7757	53.758	208.663	1.39855	200.083	20.5468	78.6245	279.826											1.42092	177.193	21.9979	73.7746	251.777	1.41639	154.907	21.7298	63.8128	219.408																1.39306	194.186	16.0469	75.4794	270.513
1.36321	150.426	18.7977	53.7026	205.063	1.3995	200.029	20.5686	78.7966	279.94											1.3999	186.994	22.0207	73.9305	261.774	1.40221	161.845	21.7521	64.3659	226.941																1.40164	189.062	16.0626	75.095	264.997
1.36088	151.487	18.8193	53.7336	206.156	1.40166	198.912	20.5903	78.7911	278.808											1.3998	187.127	22.0438	73.9968	261.941	1.40397	160.35	21.7729	64.0586	225.127																1.40225	189.619	16.0798	75.4449	265.894
1.35313	155.594	18.8427	53.9759	210.539	1.41231	193.07	20.6121	78.5296	272.674											1.39448	190.011	22.0683	74.0914	264.966	1.40963	159.459	21.7987	64.6033	224.779																1.36208	212.078	16.0964	75.8639	288.867
1.34708	158.803	18.8645	54.1369	213.921	1.43501	182.704	20.6339	78.4636	262.183											1.39674	189.276	22.0934	74.2509	264.369	1.40222	162.821	21.821	64.7524	228.311																1.41821	180.713	16.1151	74.7925	256.288
1.34805	158.438	18.8919	54.1571	213.582	1.39799	202.126	20.6559	79.3225	282.571											1.41034	182.919	22.1193	74.2295	257.978	1.42019	155.021	21.8415	64.4511	220.16																1.40193	188.535	16.1322	75.2538	264.314
1.35596	154.548	18.914	54.0614	209.561	1.40794	196.961	20.6791	79.2301	277.309											1.39942	188.67	22.1438	74.4991	264.03	1.42829	152.174	21.8618	64.4945	217.349																1.37549	204.529	16.1488	75.9116	281.327
1.35713	154.097	18.9362	54.0834	209.129	1.4174	192.227	20.7012	79.1667	272.463											1.39812	189.591	22.1671	74.6405	265.07	1.39384	167.368	21.8853	65.1556	233.285																1.38614	198.766	16.1654	75.8774	275.516
1.35708	154.286	18.9583	54.1439	209.379	1.41621	193.008	20.7231	79.261	273.34											1.39833	189.933	22.1919	74.7903	265.589	1.40869	160.573	21.9057	64.91	226.198																1.39738	192.655	16.1826	75.721	269.212
1.35158	157.327	18.9806	54.343	212.641	1.40757	198.171	20.745	79.6603	278.941											1.39443	192.437	22.2164	75.0264	268.339	1.44237	147.915	21.9262	64.7739	213.348																1.39306	194.87	16.1994	75.7431	271.465
1.34817	158.854	19.0042	54.314	214.161	1.39834	203.674	20.7672	79.9952	284.805											1.3971	191.102	22.2444	75.0144	266.989	1.40857	161.19	21.9466	65.1417	227.047																1.41041	185.897	16.2157	75.4824	262.19
1.33794	164.608	19.0276	54.5969	220.235	1.4117	196.92	20.789	79.9781	277.992											1.40106	189.655	22.2726	75.2003	265.717	1.39666	166.879	21.97	65.4416	233.073																1.39437	194.925	16.2322	76.0198	271.797
1.34942	158.785	19.0514	54.4898	214.267	1.41722	194.146	20.8109	79.9261	275.148											1.40555	187.68	22.299	75.2624	263.793	1.41833	157.755	21.9908	65.2906	223.749																1.39603	193.631	16.2486	75.8349	270.313
1.34827	159.897	19.0751	54.6856	215.584	1.42197	192.374	20.8331	80.1077	273.55											1.41732	182.482	22.3231	75.3245	258.636	1.42122	156.903	22.0112	65.395	222.993																1.40165	190.899	16.2641	75.8295	267.573
1.34625	160.983	19.0978	54.7369	216.723	1.43874	184.923	20.855	80.1061	266.057											1.39501	193.59	22.3468	75.5876	270.059	1.40724	163.404	22.0329	65.807	229.948																1.39504	194.961	16.2813	76.1642	271.978
1.34981	158.777	19.1191	54.5643	214.319	1.43813	185.451	20.8996	80.2163	266.703											1.40133	190.469	22.3724	75.576	266.909	1.42033	157.627	22.0535	65.5503	223.883																1.3847	201.085	16.2978	76.4784	278.444
1.3568	155.932	19.1464	54.6613	211.568	1.43662	186.363	20.9216	80.3359	267.734											1.39107	196.323	22.3969	75.8918	273.1	1.42749	155.285	22.0744	65.6877	221.669																1.40107	191.391	16.3143	75.9265	268.153
1.35766	156.075	19.169	54.8418	211.896	1.43132	189.75	20.9437	80.7878	271.593											1.39328	195.533	22.4225	76.0146	272.432	1.4415	151.166	22.0949	66.066	217.906																1.38976	198.032	16.3312	76.3255	275.216
1.34763	161.214	19.195	55.026	217.258	1.4311	190.783	20.9887	81.1825	273.03											1.39835	192.977	22.4486	76	269.85	1.4048	165.412	22.1159	66.2222	232.371																1.39075	197.75	16.3479	76.41	275.021
1.3744	147.731	19.2248	54.3931	203.041	1.45013	181.886	21.0112	80.8518	263.759											1.3953	195.022	22.4727	76.2441	272.114	1.39774	169.498	22.139	66.6521	236.914																1.39616	195.277	16.3645	76.5133	272.638
1.34751	161.278	19.2485	55.0365	217.324	1.41858	197.932	21.0341	81.7293	280.781											1.39357	196.361	22.4997	76.3895	273.643	1.39998	167.619	22.1597	66.2939	234.664																1.40297	191.293	16.3807	76.2428	268.378
1.35475	158.322	19.2709	55.1815	214.486	1.40064	207.272	21.0569	81.8787	290.314											1.39348	196.802	22.524	76.5416	274.241	1.40476	166.674	22.1841	66.7142	234.137																1.40282	191.302	16.3962	76.2089	268.361
1.34623	162.656	19.2975	55.3019	218.973	1.4273	193.151	21.0819	81.4663	275.685											1.39907	194.058	22.5517	76.5771	271.501	1.37656	180.461	22.2057	67.138	248.415																1.39238	196.763	16.4128	76.343	273.969
1.3547	157.955	19.3235	55.0517	213.981	1.41428	199.119	21.1039	81.3846	281.611											1.39473	196.744	22.5784	76.7676	274.405	1.40741	166.059	22.2327	66.9008	233.714																1.41015	188.15	16.4291	76.344	265.32
1.3538	158.788	19.3452	55.2175	214.967	1.39428	210.662	21.1258	81.8864	293.723											1.39736	195.626	22.6012	76.8869	273.36	1.40457	167.142	22.2538	66.8739	234.762																1.41105	187.18	16.4454	76.1247	264.12
1.35083	160.31	19.3679	55.26	216.551	1.39872	207.73	21.1483	81.6549	290.557											1.39451	197.442	22.6249	77.0349	275.336	1.42158	160.211	22.2747	66.8234	227.753																1.39719	195.113	16.4628	76.6453	272.609
1.35255	160.05	19.3895	55.4534	216.476	1.40234	205.777	21.1707	81.6408	288.568											1.3966	196.621	22.6493	77.1156	274.601	1.42333	159.247	22.2958	66.7056	226.661																1.38848	200.12	16.4802	76.8754	277.862
1.36079	155.803	19.4125	55.2505	212.015	1.40456	205.307	21.1927	81.9072	288.366											1.39239	199.178	22.677	77.2505	277.333	1.40918	166.056	22.3186	67.1948	234.002																1.40047	193.831	16.4969	76.7779	271.455
1.34456	164.287	19.437	55.5853	220.894	1.37871	220.134	21.2159	82.1228	303.502											1.39319	199.119	22.7022	77.4066	277.411	1.40278	169.972	22.3429	67.6954	238.433																1.40886	189.065	16.5127	76.4662	266.367
1.3487	162.579	19.4601	55.6902	219.271	1.39219	211.859	21.2393	81.8876	294.948											1.39619	198.007	22.7273	77.5731	276.456	1.42692	159.063	22.3637	67.1964	226.97																1.41298	187.226	16.5291	76.5037	264.547
1.35185	160.778	19.4824	55.5747	217.348	1.40529	203.908	21.2609	81.514	286.55											1.39492	198.717	22.7531	77.5756	277.194	1.42213	161.268	22.3838	67.3613	229.344																1.398	195.744	16.5464	77.0572	273.651
1.35738	158.334	19.5065	55.6018	214.919	1.3737	223.481	21.283	82.257	306.996											1.40268	194.755	22.7767	77.5556	273.178	1.40432	169.948	22.405	67.9504	238.66																1.4006	194.398	16.5634	77.0308	272.274
1.35161	161.526	19.5317	55.7875	218.32	1.38742	215.428	21.311	82.238	298.889											1.39661	199.122	22.8022	78.0709	278.097	1.40778	168.57	22.4276	67.9796	237.309																1.39048	200.129	16.5852	77.2285	278.274
1.34497	165.408	19.554	56.0415	222.469	1.39879	208.973	21.3339	82.1518	292.308											1.41414	190.63	22.8257	78.086	269.577	1.41753	164.113	22.448	67.7937	232.636																1.39536	197.785	16.604	77.2948	275.98
1.3487	163.325	19.5784	55.9319	220.277	1.40072	207.616	21.357	82.0205	290.813											1.40747	194.438	22.8485	78.3475	273.666	1.40064	172.21	22.4693	68.2184	241.203																1.39581	197.55	16.6223	77.3369	275.741
1.35339	161.388	19.602	56.0268	218.421	1.39765	209.592	21.3804	82.1571	292.935											1.40279	196.73	22.8719	78.3438	275.971	1.4079	169.855	22.4906	68.5205	239.14																1.40924	190.413	16.6399	77.0974	268.337
1.34995	163.457	19.6258	56.1855	220.657	1.39034	213.187	21.4074	82.0036	296.403											1.39847	199.313	22.8947	78.5236	278.732	1.42975	159.673	22.5106	67.9131	228.293																1.41754	186.28	16.6566	76.9622	264.06
1.34877	164.257	19.6484	56.2691	221.545	1.39112	213.928	21.4296	82.4878	297.599											1.40385	197.31	22.9202	78.7854	276.994	1.40084	173.29	22.5327	68.6822	242.752																1.40538	192.934	16.674	77.3759	271.145
1.35903	159.076	19.6708	56.123	216.189	1.40177	207.393	21.4536	82.1506	290.717											1.39736	200.817	22.9439	78.878	280.613	1.42183	163.283	22.5532	68.1504	232.162																1.41198	189.033	16.6918	77.0585	266.911
1.34694	165.35	19.6955	56.3341	222.716	1.38196	110.503	21.4945	41.6191	152.71											1.39648	201.89	22.9689	79.126	281.935	1.38311	182.138	22.5747	68.9611	251.917																1.41892	186.38	16.7093	77.2709	264.458
1.35394	161.797	19.7188	56.2586	219.062	1.38867	108.326	21.5161	41.5053	150.43											1.40146	199.199	22.9945	79.0658	279.17	1.39264	178.188	22.599	69.161	248.152																1.40661	192.454	16.7274	77.4166	270.707
1.35333	162.746	19.7429	56.4885	220.249	1.35968	118.229	21.5386	41.8629	160.753											1.39417	203.81	23.0193	79.4087	284.145	1.40915	170.443	22.6205	68.9748	240.18																1.40432	194.3	16.7447	77.7144	272.859
1.35101	163.957	19.767	56.5289	221.508	1.38509	109.684	21.5659	41.6313	151.922											1.39852	201.88	23.0434	79.5508	282.333	1.42305	164.208	22.6402	68.7446	233.677																1.42044	186.321	16.762	77.5287	264.657
1.34985	164.818	19.7904	56.6362	222.48	1.38807	109.186	21.5902	41.7713	151.558											1.39928	201.983	23.07	79.7282	282.631	1.401	175.113	22.6607	69.4288	245.333																1.40414	194.958	16.7795	77.9429	273.747
1.34484	167.573	19.8161	56.7412	225.359	1.38948	108.513	21.6117	41.6638	150.776											1.39504	204.413	23.0939	79.8584	285.166	1.39442	177.896	22.6822	69.3669	248.062																1.39476	199.396	16.7979	77.848	278.11
1.35964	160.381	19.8463	56.6797	218.06	1.38802	108.797	21.6333	41.6137	151.012											1.4024	200.748	23.1214	79.8738	281.529	1.39731	177.485	22.7053	69.7224	248.001																1.43983	177.446	16.8155	77.2766	255.493
1.35332	163.92	19.8731	56.8943	221.836	1.37581	113.754	21.6557	42.1221	156.505											1.39314	206.412	23.1468	80.208	287.561	1.40988	170.172	22.7255	68.9952	239.922																1.42269	184.881	16.8334	77.3478	263.028
1.35153	165.333	19.8951	57.0963	223.452	1.38973	109.143	21.6779	41.9281	151.679											1.40831	198.687	23.1712	80.223	279.813	1.41063	170.507	22.7472	69.2639	240.521																1.44647	174.807	16.8509	77.2898	252.853
1.35806	162.413	19.9204	57.1454	220.566	1.37331	114.536	21.7007	42.1111	157.293											1.39203	207.016	23.1939	80.2254	288.172	1.45022	155.01	22.7681	69.1032	224.799																1.45365	171.961	16.8679	77.2558	249.971
1.3738	154.113	19.9429	56.6495	211.721	1.38458	110.522	21.7224	41.8957	153.026											1.42966	187.268	23.2189	79.6079	267.729	1.39308	180.402	22.7889	70.103	251.314																1.41839	186.945	16.8849	77.4018	265.161
1.35419	164.138	19.9669	57.1163	222.273	1.36337	117.372	21.7438	42.0005	160.022											1.38271	211.485	23.2419	79.9795	292.422	1.39316	180.558	22.8103	70.178	251.546																1.43696	178.129	16.9018	77.0661	255.964
1.34798	167.638	19.989	57.2968	225.973	1.37792	113.027	21.7696	42.0915	155.743											1.41624	193.489	23.2666	79.6731	274.027	1.44235	158.752	22.8338	69.5235	228.976																1.41323	188.822	16.9187	77.213	266.85
1.35297	165.123	20.0109	57.2659	223.406	1.39671	107.062	21.7904	41.8791	149.534											1.41147	195.935	23.293	79.7208	276.556	1.4091	173.048	22.8534	70.0279	243.842																1.41815	186.61	16.9345	77.2115	264.641
1.36717	158.539	20.0331	57.2314	216.749	1.36426	117.686	21.8125	42.2116	160.555											1.396	203.676	23.3188	79.734	284.331	1.39789	179.455	22.8753	70.5982	250.859																1.39853	196.668	16.9516	77.5307	275.047
1.35113	166.081	20.0574	57.2881	224.398	1.38922	110.23	21.8402	42.2812	153.135											1.39022	206.537	23.3468	79.6451	287.132	1.41986	169.027	22.8955	70.2261	239.994																1.40159	194.949	16.9681	77.4352	273.238
1.33979	172.618	20.0796	57.5882	231.271	1.37632	114.252	21.8623	42.365	157.248											1.37768	215.19	23.3737	80.2854	296.462	1.40588	176.707	22.9171	70.935	248.43																1.40038	194.551	16.9852	77.0399	272.444
1.34641	169.286	20.101	57.6003	227.928	1.39103	108.67	21.8847	41.8841	151.163											1.39024	207.294	23.3997	79.9882	288.189	1.42013	169.413	22.9368	70.4266	240.588																1.38269	204.341	17.0022	77.3163	282.539
1.35025	167.589	20.1256	57.6591	226.287	1.35875	120.89	21.9107	42.6879	164.259											1.39338	205.865	23.4239	80.0486	286.848	1.43793	162.234	22.9566	70.3276	233.281																1.39259	199.271	17.0183	77.3601	277.504
1.34548	170.614	20.1495	57.8854	229.558	1.36998	116.963	21.932	42.6282	160.237											1.39638	203.422	23.4527	79.6972	284.054	1.40518	177.262	22.9778	71.0322	249.086																1.38229	205.1	17.0361	77.5264	283.509
1.35056	167.795	20.1728	57.7822	226.618	1.36231	118.994	21.9537	42.4564	162.107											1.39098	206.082	23.4813	79.6299	286.656	1.42825	166.567	22.9976	70.6011	237.899																1.4035	193.639	17.0518	77.2879	271.772
1.35172	167.317	20.1946	57.8162	226.165	1.38953	109.959	21.9771	42.2195	152.791											1.40955	197.657	23.5056	80.0471	278.607																					1.40057	194.506	17.0692	77.0661	272.42
1.35555	165.932	20.2185	57.9725	224.929	1.39102	109.662	21.9983	42.2746	152.542											1.39895	201.545	23.5351	79.4871	281.953																					1.41425	188.381	17.0859	77.2111	266.418
1.35106	168.147	20.2424	57.9881	227.177	1.37687	113.977	22.0207	42.3187	156.931											1.40158	201.369	23.5625	79.9485	282.236																					1.40213	194.006	17.1037	77.1459	272.023
1.36095	163.444	20.2661	57.9828	222.438	1.38932	110.213	22.046	42.2868	153.121											1.39201	206.766	23.5898	80.1097	287.82																					1.39451	198.27	17.1191	77.344	276.489
1.35788	165.24	20.2884	58.1167	224.377	1.38922	109.956	22.0678	42.1929	152.754											1.40025	201.78	23.6215	79.8384	282.543																					1.39013	200.015	17.1353	77.1566	278.047
1.34663	171.242	20.3089	58.3076	230.599	1.38948	110.248	22.0896	42.3328	153.187											1.38855	102.803	23.6459	39.4915	142.747																					1.37803	207.121	17.1518	77.4057	285.419
1.34366	172.894	20.3316	58.3508	232.312	1.36742	117.369	22.1123	42.463	160.493											1.4046	98.2967	23.67	39.3342	138.067																					1.39015	200.835	17.1678	77.4729	279.19
1.36134	162.889	20.3553	57.8448	221.746	1.39024	110.045	22.136	42.3398	152.99											1.38739	103.166	23.704	39.4945	143.132																					1.38551	203.073	17.1846	77.4149	281.359
1.3425	174.318	20.3796	58.6229	234.022	1.39669	108.933	22.1591	42.6146	152.145											1.38656	103.321	23.7299	39.4686	143.26																					1.39381	198.731	17.2015	77.3903	276.993
1.34634	172.285	20.4014	58.6135	231.955	1.4009	107.07	22.1809	42.3338	149.994											1.39416	100.989	23.7575	39.3455	140.794																					1.38408	204.447	17.2166	77.624	282.971
1.35351	168.339	20.4247	58.4662	227.848	1.41389	104.204	22.2024	42.5562	147.332											1.38232	104.743	23.7819	39.5912	144.788																					1.39293	199.462	17.2334	77.5145	277.836
1.34559	172.678	20.4477	58.6098	232.354	1.40276	106.763	22.2236	42.4118	149.763											1.38091	105.2	23.8066	39.5963	145.272																					1.39023	201.017	17.2486	77.5573	279.46
1.35169	169.769	20.4699	58.6573	229.474	1.38133	114.106	22.2461	42.8839	157.618											1.38636	103.752	23.8329	39.6134	143.838																					1.38518	203.629	17.2657	77.5439	282.064
1.34952	170.721	20.4931	58.6131	230.391	1.39104	110.355	22.2676	42.5447	153.508											1.39272	101.7	23.8675	39.4731	141.64																					1.40089	94.2734	17.2815	37.3806	132.067
1.35532	168.902	20.516	58.9699	228.916	1.38049	114.368	22.2925	42.8901	157.883											1.37743	106.656	23.8942	39.769	146.91																					1.40688	93.0464	17.2974	37.4547	130.905
1.35098	170.624	20.5379	58.8349	230.509	1.37254	117.122	22.3177	42.9907	160.755											1.38104	105.796	23.9246	39.8281	146.109																					1.36849	103.809	17.3134	37.8013	142.062
1.35445	169.212	20.561	58.9296	229.189	1.36566	120.484	22.3418	43.3947	164.54											1.3882	103.738	23.9516	39.7975	144.009																					1.42646	87.976	17.3289	37.1339	125.494
1.35604	168.575	20.5853	58.9762	228.595	1.41571	103.11	22.3636	42.2977	145.974											1.38401	104.858	23.976	39.7932	145.124																					1.39824	94.7551	17.345	37.326	132.491
1.35397	169.918	20.6069	59.1054	230.064	1.37823	116.333	22.3861	43.3604	160.334											1.38795	104.003	24.0006	39.8765	144.351																					1.37218	102.539	17.361	37.7182	140.702
1.3549	169.675	20.6309	59.1668	229.893	1.37937	116.205	22.4077	43.445	160.29											1.38052	106.334	24.0247	39.9918	146.797																					1.37649	101.48	17.3772	37.7642	139.685
1.32919	184.342	20.6549	59.5408	245.026	1.39944	109.209	22.4298	43.0207	152.831											1.39441	102.278	24.0492	39.8787	142.618																					1.37319	102.343	17.3938	37.7522	140.537
1.36108	166.787	20.6778	59.1941	227.01	1.37457	117.074	22.4524	43.2018	160.926											1.38445	105.499	24.0745	40.0796	146.058																					1.39041	97.3189	17.4099	37.5711	135.313
1.35461	170.241	20.7001	59.3271	230.611	1.38922	113.044	22.4754	43.3778	157.044											1.38088	106.293	24.0985	40.0269	146.778																					1.40301	94.2105	17.4264	37.5575	132.178
1.34568	175.42	20.722	59.5625	236.059	1.39442	111.043	22.4972	43.1884	154.84											1.38021	106.751	24.1231	40.1036	147.338																					1.38032	100.201	17.4425	37.6714	138.309
1.35469	170.283	20.7453	59.3427	230.68	1.40274	108.759	22.5194	43.2035	152.561											1.37773	107.9	24.1537	40.2623	148.657																					1.40155	94.2955	17.4588	37.456	132.16
1.35794	169.087	20.774	59.4762	229.61	1.39469	111.602	22.5413	43.4355	155.65											1.40443	100.189	24.1777	40.0645	140.709																					1.36901	103.085	17.475	37.5928	141.125
1.34931	173.964	20.7958	59.704	234.732	1.38199	116.188	22.563	43.7444	160.571											1.37881	107.789	24.2039	40.3409	148.62																					1.38743	98.7284	17.4909	37.8174	136.979
1.33979	180.11	20.8174	60.0963	241.31	1.39048	112.383	22.5859	43.2527	156.266											1.38619	105.582	24.2275	40.3158	146.357																					1.3931	96.5687	17.5071	37.5399	134.53
1.34757	175.962	20.841	60.0666	237.122	1.38137	116.706	22.6091	43.8703	161.215											1.39235	104.112	24.2543	40.3915	144.96																					1.37687	100.957	17.5241	37.6119	139.005
1.3649	166.368	20.8653	59.6743	227.075	1.37705	117.649	22.6313	43.7113	162.01											1.37533	109.601	24.2834	40.6366	150.737																					1.39786	95.1974	17.5408	37.4675	133.073
1.35646	171.083	20.8886	59.9308	232.068	1.42351	103.45	22.6569	43.2481	147.262											1.37869	108.529	24.3097	40.6072	149.629																					1.38298	99.8888	17.5566	37.8201	138.144
1.35015	174.599	20.9137	60.0554	235.736	1.39263	114.018	22.6788	44.1401	158.785											1.39231	104.88	24.336	40.6728	146.026																					1.3755	102.065	17.5735	37.8805	140.391
1.34522	177.551	20.9368	60.1951	238.845	1.36345	123.149	22.7016	44.0732	167.908											1.37751	109.296	24.3608	40.7607	150.556																					1.40714	93.0425	17.588	37.4947	130.923
1.35253	173.673	20.9587	60.1544	234.898	1.38257	116.769	22.7284	44.0219	161.441											1.39437	104.16	24.3842	40.6251	145.237																					1.39231	97.4343	17.6026	37.8125	135.658
1.35209	174.454	20.983	60.3478	235.879	1.36063	124.638	22.75	44.2641	169.587											1.38471	107.363	24.412	40.8158	148.667																					1.38886	98.087	17.6171	37.7274	136.229
1.34371	179.439	21.005	60.5684	241.115	1.39254	113.989	22.7728	44.1213	158.735											1.38078	108.993	24.4356	41.0113	150.496
1.35415	173.825	21.032	60.4845	235.385	1.38255	117.968	22.817	44.4685	163.097											1.39183	105.576	24.4627	40.8885	146.944
1.36582	168.186	21.0553	60.493	229.711	1.42466	104.376	22.8389	43.7522	148.7											1.3816	108.457	24.4874	40.8964	149.844
1.34895	177.173	21.0785	60.7288	238.997	1.38339	117.694	22.8612	44.4793	162.817											1.38892	106.468	24.5132	40.9264	147.876
1.356	173.39	21.1015	60.6576	235.117	1.40303	110.664	22.8854	43.9979	155.266											1.37042	112.708	24.538	41.2457	154.457
1.34715	178.806	21.1232	60.9777	240.879	1.37487	120.805	22.9108	44.6119	166.092											1.37047	112.716	24.5622	41.2574	154.473
1.35693	173.027	21.147	60.6872	234.785	1.37834	119.696	22.9337	44.6317	164.982											1.38794	107.526	24.5875	41.2338	149.239
1.35294	175.387	21.1725	60.8145	237.288	1.37526	121.293	23.0065	44.8522	166.809											1.38611	108.064	24.6102	41.2603	149.789
1.34143	182.319	21.1957	61.1251	244.568	1.40549	111.796	23.03	44.7231	157.129											1.39874	104.36	24.6335	41.1647	145.972
1.35049	177.299	21.2253	61.0419	239.442	1.38683	118.246	23.052	45.0927	163.987											1.382	109.748	24.6587	41.4329	151.672
1.36132	171.901	21.2471	61.0558	234.011	1.38345	119.482	23.0742	45.1594	165.297											1.37696	111.466	24.6854	41.5139	153.485
1.35181	177.158	21.2704	61.2384	239.485	1.37398	121.967	23.0965	44.9431	167.581											1.3814	110.272	24.7099	41.5593	152.33
1.34978	178.67	21.2921	61.3947	241.166	1.37585	122.551	23.1219	45.3759	168.611											1.3768	111.694	24.734	41.5954	153.78
1.34857	179.511	21.3155	61.4679	242.084	1.40006	113.956	23.143	44.9646	159.545											1.37349	113.12	24.7604	41.7397	155.37
1.36083	172.822	21.3391	61.289	235.181	1.37911	121.011	23.1656	45.202	166.886											1.39431	106.851	24.7844	41.6628	148.984
1.35397	177.005	21.3625	61.5668	239.659	1.38901	118.785	23.1896	45.5541	164.994											1.37551	112.771	24.8125	41.8369	155.118
1.36233	173.207	21.3934	61.6813	235.964	1.37812	122.711	23.2114	45.7287	169.11											1.37638	112.604	24.8386	41.8737	154.986
1.35146	178.836	21.4171	61.7499	241.689	1.40065	114.915	23.2337	45.4114	160.956											1.38551	110.143	24.863	41.9621	152.605
1.34625	181.755	21.4405	61.8108	244.687	1.40971	111.524	23.2567	45.0799	157.217											1.38996	108.93	24.8873	41.9876	151.409
1.35208	178.849	21.4628	61.8665	241.819	1.37847	122.294	23.2818	45.5978	168.577											1.37935	112.337	24.9122	42.1243	154.951
1.35856	175.594	21.4865	61.8767	238.554	1.37733	123.246	23.306	45.8347	169.751											1.38377	111.26	24.9396	42.2001	153.958
1.3472	182.193	21.5104	62.1339	245.451	1.38027	122.401	23.328	45.8759	168.946											1.37238	115.06	24.9731	42.3237	157.905
1.35989	175.364	21.5338	62.0299	238.474	1.38399	121.357	23.3509	45.9349	167.958											1.37518	114.416	24.9997	42.417	157.342
1.36213	174.135	21.5558	61.9887	237.195	1.37825	123.809	23.3728	46.1551	170.639											1.38238	111.921	25.026	42.2943	154.717
1.35205	180.802	21.5799	62.5318	244.452	1.38499	121.026	23.3951	45.9298	167.62											1.39555	108.292	25.0502	42.3481	151.126
1.34973	181.476	21.6032	62.3459	244.944	1.41216	112.449	23.4174	45.7251	158.796											1.38356	111.945	25.0757	42.4344	154.883
1.34657	183.856	21.6299	62.5822	247.575	1.39155	119.759	23.4393	46.236	166.651											1.3801	113.552	25.0998	42.6517	156.713
1.35516	179.424	21.6527	62.6158	243.148	1.38544	121.568	23.4609	46.1911	168.425											1.3813	113.034	25.1246	42.5913	156.133
1.34048	187.489	21.6744	62.6912	251.326	1.41994	110.685	23.4825	45.8763	157.167											1.37934	113.999	25.1496	42.7354	157.243
1.35181	181.612	21.697	62.7835	245.505	1.41398	112.196	23.5039	45.8292	158.644											1.36615	118.639	25.1742	42.903	162.078
1.34476	186.252	21.7253	63.0573	250.464	1.37358	127.126	23.5261	46.7916	174.618											1.38083	113.657	25.1983	42.7942	156.94
1.3673	173.981	21.749	62.8295	237.883	1.39639	118.192	23.5481	46.2055	165.042											1.3816	113.687	25.224	42.8745	157.07
1.34423	187.192	21.773	63.2854	251.629	1.37883	125.702	23.5916	46.9293	173.322											1.38935	111.236	25.2484	42.8125	154.546
1.35485	181.023	21.8	63.1137	245.26	1.36627	130.862	23.614	47.2094	178.793											1.38264	113.975	25.2743	43.1001	157.587
1.36572	174.983	21.8226	62.9183	238.978	1.38019	124.78	23.6395	46.76	172.221											1.382	114.277	25.2986	43.1575	157.931
1.36433	176.528	21.849	63.2193	240.842	1.37727	127.265	23.6635	47.3181	175.279											1.37532	116.865	25.3247	43.3289	160.726
1.36253	177.362	21.8727	63.2022	241.661	1.38674	122.906	23.6861	46.8578	170.438											1.36797	119.327	25.3547	43.3609	163.236
1.36049	179.254	21.8986	63.5092	243.873	1.41297	114.589	23.7122	46.7007	161.911											1.36767	119.864	25.3853	43.5205	163.933
1.34503	187.717	21.9214	63.6128	252.484	1.41032	115.15	23.7342	46.62	162.398											1.36801	120.2	25.4154	43.6855	164.434
1.36668	176.04	21.945	63.4659	240.592	1.40598	117.193	23.7572	46.9402	164.771											1.38218	115.354	25.4474	43.5562	159.44
1.3591	180.501	21.9683	63.7061	245.319	1.40126	119.247	23.7813	47.191	167.095											1.38062	116.011	25.4792	43.6267	160.167
1.35662	181.635	21.99	63.6623	246.41	1.38165	126.358	23.8033	47.535	174.582											1.36734	120.589	25.504	43.7566	164.886
1.34766	187.577	22.0134	64.0557	252.79	1.36889	131.217	23.8262	47.6917	179.622											1.3775	117.383	25.529	43.7891	161.694
1.34989	186.495	22.0397	64.0997	251.748	1.40593	117.944	23.8483	47.2346	165.822											1.3744	118.507	25.5548	43.836	162.875
1.35645	182.642	22.0619	63.9807	247.745	1.41174	116.823	23.8955	47.4666	164.924											1.3853	115.392	25.5782	43.9383	159.852
1.34413	189.8	22.0837	64.1552	255.116	1.36721	133.036	23.9171	48.1262	181.888											1.3788	117.511	25.6025	43.9846	162.024
1.35586	183.443	22.1064	64.1519	248.722	1.3865	125.348	23.9395	47.7619	173.795											1.38169	116.904	25.6298	44.098	161.525
1.3523	185.961	22.1292	64.3668	251.476	1.38464	126.583	23.9636	47.9848	175.272											1.38182	116.65	25.658	44.0129	161.189
1.3487	187.947	22.1531	64.3892	253.484	1.41091	117.126	23.9862	47.4857	165.254											1.36348	123.794	25.6861	44.4353	168.79
1.3547	185.214	22.1826	64.5526	250.909	1.39072	124.654	24.0093	48.0285	173.359											1.37103	120.985	25.7116	44.3407	165.874
1.34345	192.175	22.2036	64.8324	258.178	1.41742	115.773	24.0308	47.6945	164.099											1.39006	114.856	25.7393	44.2793	159.657
1.3608	181.533	22.2252	64.3922	247.03	1.3758	131.01	24.0529	48.5189	180.242											1.37723	118.94	25.7636	44.3301	163.809
1.34873	188.892	22.2474	64.7138	254.764	1.39457	123.886	24.075	48.2083	172.767											1.37505	120.469	25.792	44.6361	165.651
1.35596	185.011	22.2691	64.7259	250.869	1.37299	132.822	24.0977	48.8062	182.363											1.37228	121.783	25.8209	44.7895	167.12
					1.38671	127.022	24.1199	48.4297	176.143											1.37438	120.95	25.8449	44.7316	166.232
					1.38402	128.261	24.1416	48.554	177.516											1.37072	122.353	25.87	44.8081	167.712
					1.37727	131.539	24.1864	48.9132	181.166											1.37791	120.024	25.8976	44.8151	165.381
					1.40608	121.486	24.2081	48.6721	170.819											1.39052	116.341	25.9212	44.9095	161.775
					1.42325	115.855	24.2296	48.4053	164.89											1.39005	116.786	25.9431	45.0291	162.338
					1.37586	132.89	24.2513	49.225	182.839											1.38016	120.014	25.9661	45.0813	165.64
					1.40113	123.488	24.2734	48.8619	173.023											1.3762	121.352	25.9893	45.1036	167.004
					1.40676	122.565	24.2957	49.1879	172.421											1.38762	118.187	26.0197	45.2735	163.998
					1.37707	133.378	24.3174	49.5669	183.671											1.38751	117.907	26.0427	45.1569	163.596
					1.37436	134.119	24.3391	49.4794	184.329											1.3654	126.364	26.0668	45.6096	172.537
					1.37326	135.223	24.3607	49.7353	185.695											1.37608	122.368	26.0914	45.4733	168.389
					1.41645	119.386	24.3826	49.0699	169.105											1.37862	121.345	26.1156	45.408	167.288
					1.38329	131.57	24.4049	49.7122	181.999											1.36913	125.375	26.1413	45.7119	171.654
					1.38395	131.733	24.4268	49.8644	182.312											1.38329	120.667	26.1661	45.7058	166.917
					1.40737	122.327	24.4485	49.1665	172.16
					1.41107	121.667	24.4703	49.352	171.681
					1.3924	128.381	24.4919	49.6781	178.758
					1.38664	131.26	24.5376	50.0301	182.011
					1.40749	124.136	24.559	49.9073	174.72
					1.38678	131.723	24.5804	50.2327	182.671
					1.3698	138.565	24.6019	50.4898	189.806
					1.37516	136.795	24.623	50.5765	188.114
					1.40254	125.91	24.6443	50.0002	176.593
					1.37524	137.352	24.6664	50.7941	188.892
					1.38113	135.432	24.7117	50.887	187.049
					1.40291	127.474	24.7328	50.6676	178.834
					1.36467	143.872	24.7546	51.6864	196.338
					1.40788	125.253	24.7759	50.4099	176.341
					1.3898	133.101	24.7976	51.1614	184.983
					1.38503	134.706	24.8188	51.1378	186.572
					1.36496	144.798	24.8632	52.0647	197.643
					1.36879	142.537	24.8846	51.7915	195.103
					1.38293	136.946	24.9061	51.6992	189.386
					1.38576	135.791	24.9295	51.631	188.174
					1.37868	139.487	24.974	52.0626	192.308
					1.36499	145.106	24.9962	52.1655	198.068
					1.3986	131.709	25.0192	51.7895	184.208
					1.3915	135.074	25.0404	52.1493	187.956
					1.36291	146.949	25.084	52.5318	200.278
					1.3756	140.912	25.108	52.1488	193.837
					1.38163	139.637	25.1221	52.5407	192.926
					1.39951	133.651	25.1618	52.6303	187.047
					1.42463	123.478	25.1773	51.7688	175.91
					1.3924	136.337	25.2001	52.7647	189.837
					1.374	143.617	25.2225	52.9246	197.331
					1.41806	127.48	25.2497	52.5695	180.774
					1.38467	140.401	25.2727	53.2097	194.409
					1.37654	143.064	25.2946	53.0567	196.933
					1.36267	151.14	25.3244	53.9538	205.954
					1.40188	133.839	25.347	53.0291	187.627
					1.40101	135.025	25.3701	53.3786	189.171
					1.41936	127.821	25.3989	52.8716	181.424
					1.37403	146.454	25.422	53.9433	201.232
					1.41918	128.936	25.4446	53.3145	182.984
					1.36929	148.652	25.4677	54.05	203.548
					1.37624	146.27	25.4973	54.1998	201.301
					1.39923	137.104	25.5193	53.9645	191.841
					1.38076	145.323	25.5423	54.5042	200.656
					1.36827	149.534	25.5698	54.2126	204.604
					1.38819	142.484	25.5946	54.4963	197.795
					1.38208	145.755	25.6201	54.8566	201.444
					1.38459	144.846	25.6447	54.8783	200.552
					1.38978	141.821	25.6687	54.4689	197.1
					1.38178	146.076	25.6922	54.9362	201.846
[truncated: 55 more columns]

## Sheet: FUCCI L1210
Experiment #1					Experiment #2					Experiment #3					Experiment #4					Experiment #5					Experiment #6					Experiment #7					Experiment #8					Experiment #9					Experiment #10
Dry density (g/ml)	Dry volume (fl)	Time (h)	Buoyant mass in H2O media (pg)	Dry mass (pg)	Dry density (g/ml)	Dry volume (fl)	Time (h)	Buoyant mass in H2O media (pg)	Dry mass (pg)	Dry density (g/ml)	Dry volume (fl)	Time (h)	Buoyant mass in H2O media (pg)	Dry mass (pg)	Dry density (g/ml)	Dry volume (fl)	Time (h)	Buoyant mass in H2O media (pg)	Dry mass (pg)	Dry density (g/ml)	Dry volume (fl)	Time (h)	Buoyant mass in H2O media (pg)	Dry mass (pg)	Dry density (g/ml)	Dry volume (fl)	Time (h)	Buoyant mass in H2O media (pg)	Dry mass (pg)	Dry density (g/ml)	Dry volume (fl)	Time (h)	Buoyant mass in H2O media (pg)	Dry mass (pg)	Dry density (g/ml)	Dry volume (fl)	Time (h)	Buoyant mass in H2O media (pg)	Dry mass (pg)	Dry density (g/ml)	Dry volume (fl)	Time (h)	Buoyant mass in H2O media (pg)	Dry mass (pg)	Dry density (g/ml)	Dry volume (fl)	Time (h)	Buoyant mass in H2O media (pg)	Dry mass (pg)
1.40954	196.94	2.14677	73.7934	277.594	1.41716	209.761	0.00479546	80.1189	297.266	1.42923	166.135	0.00603484	65.4833	237.445	1.43175	177.302	0.0080311	70.3691	253.852	1.43856	162.335	0.0240705	65.3918	233.529	1.44935	149.304	0.00689827	76.3822	216.394	1.45629	150.904	0.224792	73.7712	219.761	1.43476	134.458	5.03382	60.077	192.915	1.4144	145.855	0.00520005	65.9936	206.298	1.4378	135.126	25.1198	56.4616	194.285
1.40542	199.239	2.16541	73.8304	280.015	1.43471	199.998	0.0239812	79.8969	286.938	1.427	167.546	0.0250472	65.6558	239.089	1.42645	177.607	0.0200179	70.377	253.347	1.42755	167.186	0.0365437	65.5578	238.667	1.45391	147.5	0.0220075	76.5727	214.451	1.47079	149.151	0.233771	73.3419	219.369	1.44028	132.419	5.05735	59.882	190.72	1.4108	147.188	0.0188455	66.0697	207.653	1.44236	133.675	25.1409	56.4608	192.809
1.3971	204.474	2.18737	74.0749	285.67	1.439	198.305	0.0449244	80.0777	285.361	1.42076	170.231	0.0514248	65.6426	241.858	1.44243	172.566	0.0405167	70.3762	248.915	1.43179	165.019	0.0486807	65.4001	236.272	1.44576	151.127	0.0410429	76.9504	218.493	1.47991	146.014	0.246404	73.0975	216.088	1.41957	139.694	5.08277	60.3251	198.306	1.39869	151.775	0.0371697	66.2886	212.287	1.44821	132.317	25.1617	56.6615	191.622
1.39975	203.552	2.21285	74.2881	284.922	1.4264	205.65	0.065466	80.4531	293.339	1.42365	169.519	0.0761342	65.8767	241.336	1.4397	174.551	0.0594794	70.7008	251.301	1.41988	170.993	0.0696367	65.8533	242.79	1.42975	156.191	0.0596941	77.1366	223.314	1.49496	141.994	0.265671	73.1527	212.276	1.44813	130.743	5.10889	60.0967	189.333	1.38925	155.369	0.05932	66.6642	215.846	1.43701	136.198	25.1833	56.8037	195.719
1.40888	198.75	2.23663	74.35	280.015	1.42	209.572	0.0858258	80.6602	297.592	1.43477	165.412	0.100702	66.1228	237.328	1.45009	171.487	0.0788836	70.5825	248.671	1.43279	165.805	0.0887784	65.8862	237.564	1.43584	154.36	0.0795715	77.1329	221.637	1.45737	154.644	0.283991	73.4502	225.375	1.42714	137.421	5.13369	60.3662	196.12	1.41909	145.257	0.0828535	66.4017	206.133	1.43824	136.091	25.2045	56.9239	195.731
1.41884	193.274	2.25981	74.2258	274.224	1.42737	205.734	0.106278	80.7009	293.658	1.44666	160.008	0.123395	65.8508	231.477	1.43314	177.732	0.0981188	70.8211	254.715	1.43292	166.115	0.107185	66.0191	238.028	1.43133	156.343	0.100183	77.4511	223.779	1.48326	146.048	0.304743	73.5882	216.628	1.41624	141.891	5.15728	60.8404	200.951	1.38196	159.415	0.110233	66.9565	220.305	1.43922	136.104	25.2259	57.0612	195.882
1.40965	199.325	2.28273	74.7206	280.978	1.42774	205.821	0.126578	80.8222	293.859	1.42921	168.469	0.147543	66.4017	240.778	1.44082	174.451	0.117976	70.8638	251.352	1.43031	167.498	0.125411	66.1265	239.575	1.4338	155.566	0.121908	77.4393	223.05	1.4768	148.436	0.33387	73.8596	219.211	1.42228	139.504	5.18053	60.6412	198.414	1.40158	152.255	0.132744	66.9424	213.398	1.44671	133.561	25.2472	57.0008	193.223
1.41078	198.432	2.30653	74.6142	279.944	1.4229	208.933	0.146946	81.0337	297.292	1.43042	168.425	0.171481	66.5913	240.918	1.45243	172.371	0.137006	70.8522	250.357	1.43512	165.285	0.143291	66.0679	237.205	1.44764	151.784	0.142496	77.5663	219.728	1.49186	144.092	0.362919	73.7988	214.965	1.4164	141.568	5.20483	60.7281	200.518	1.4208	146.052	0.15558	66.8271	207.511	1.45236	132.03	25.268	57.0919	191.755
1.41555	196.089	2.32902	74.6644	277.574	1.43122	208.132	0.167367	80.7607	297.884	1.42182	172.814	0.19532	66.8447	245.71	1.43503	177.434	0.157031	71.0557	254.623	1.41973	172.453	0.161627	66.2819	244.838	1.41713	161.368	0.163284	77.7535	228.679	1.5066	140.637	0.384125	74.0508	211.883	1.43945	134.644	5.23013	60.7602	193.813	1.39805	153.859	0.17771	67.1098	215.102	1.44425	135.03	25.2877	57.2957	195.018
1.4191	194.771	2.35135	74.8482	276.4	1.41656	214.185	0.187219	81.7178	303.407	1.43256	168.323	0.217691	66.9154	241.133	1.45024	173.539	0.176915	70.8955	251.674	1.43443	166.27	0.179089	66.3319	238.503	1.43361	156.51	0.18393	77.8815	224.374	1.48134	148.266	0.404907	74.4396	219.632	1.43316	136.569	5.25426	60.7981	195.725	1.39082	157.014	0.200384	67.3545	218.377	1.44824	133.879	25.3082	57.344	193.888
1.40121	205.434	2.37335	75.2851	287.855	1.43949	201.325	0.206946	81.4301	289.806	1.44666	162.076	0.239627	66.7125	234.469	1.4437	173.51	0.198193	71.0134	250.496	1.43123	167.962	0.197818	66.4635	240.393	1.4383	155.382	0.204541	78.0188	223.486	1.48092	148.83	0.425579	74.6651	220.406	1.40826	145.092	5.27745	61.0898	204.327	1.39964	154.326	0.22321	67.566	216.002	1.45241	132.555	25.3292	57.3321	192.524
1.41058	199.92	2.3953	75.1329	282.002	1.44498	198.717	0.226999	81.4762	287.143	1.43536	167.271	0.261689	66.9618	240.094	1.4427	174.1	0.218862	71.027	251.173	1.43733	165.265	0.21816	66.4297	237.54	1.42867	158.306	0.225093	78.0279	226.167	1.46625	153.12	0.44965	74.6437	224.512	1.43163	137.445	5.30152	60.973	196.77	1.38457	161.34	0.244451	67.8316	223.387	1.45031	133.251	25.3492	57.3532	193.256
1.40986	201.567	2.41826	75.6157	284.18	1.45478	194.33	0.24665	81.5786	282.707	1.44142	165.244	0.283219	67.1458	238.186	1.4347	178.031	0.241664	71.2128	255.421	1.42404	171.537	0.238227	66.6715	244.275	1.43418	156.993	0.246742	78.2136	225.158	1.47423	151.281	0.471056	74.9198	223.023	1.44715	133.071	5.32588	61.0269	192.575	1.39857	155.071	0.267369	67.7334	216.878	1.45277	132.789	25.3697	57.4841	192.913
1.40056	206.903	2.44106	75.6967	289.779	1.46148	191.253	0.266499	81.573	279.512	1.44076	165.58	0.305049	67.1784	238.561	1.43411	178.598	0.264526	71.3415	256.129	1.43274	168.201	0.257259	66.8188	240.989	1.42353	160.681	0.26741	78.4083	228.733	1.47267	152.242	0.493405	75.1677	224.202	1.40761	146.524	5.34992	61.5843	206.249	1.41543	150.269	0.288922	67.8198	212.695	1.44395	136.202	25.3894	57.7593	196.669
1.41241	200.812	2.46377	75.8412	283.628	1.46314	190.9	0.286912	81.7416	279.314	1.43521	168.505	0.32716	67.4316	241.841	1.4267	181.89	0.285821	71.3092	259.502	1.43711	165.885	0.276773	66.6387	238.395	1.43846	155.971	0.288192	78.3406	224.358	1.46403	153.712	0.514344	75.4513	225.039	1.43628	136.895	5.377	61.3512	196.62	1.39365	157.871	0.3096	68.1862	220.018	1.45261	133.223	25.4094	57.6529	193.522
1.40894	202.973	2.48583	75.9557	285.975	1.45685	194.669	0.307254	82.1245	283.603	1.4429	165.471	0.349254	67.4891	238.758	1.43058	180.667	0.306802	71.5336	258.459	1.43272	168.054	0.296848	66.7728	240.775	1.43337	157.986	0.308674	78.5813	226.452	1.49492	146.329	0.537101	75.4043	218.749	1.44903	133.349	5.40581	61.407	193.227	1.38948	160.086	0.343515	68.4686	222.436	1.44869	134.841	25.4296	57.8238	195.342
1.4217	196.135	2.5076	75.8927	278.845	1.47942	184.269	0.327586	81.9002	272.612	1.44393	165.306	0.37111	67.5861	238.691	1.43337	179.373	0.327807	71.521	257.108	1.42458	172.365	0.31634	67.0728	245.548	1.42783	159.751	0.329983	78.6141	228.097	1.46637	154.945	0.558166	75.5598	227.207	1.46067	130.218	5.43414	61.4356	190.205	1.40291	154.965	0.365665	68.3737	217.402	1.45408	133.243	25.45	57.8608	193.746
1.40918	203.519	2.52977	76.2148	286.796	1.48057	184.058	0.348097	82.0184	272.511	1.43527	169.508	0.393253	67.8403	243.291	1.44204	175.699	0.348716	71.5766	253.365	1.43144	169.34	0.335236	67.05	242.399	1.41356	165.087	0.357153	78.9744	233.36	1.49006	147.992	0.580699	75.5663	220.517	1.4335	138.508	5.45948	61.6966	198.55	1.40199	156.032	0.386239	68.7018	218.755	1.43596	139.813	25.4701	58.1823	200.766
1.41263	201.901	2.55283	76.2974	285.211	1.4681	190.213	0.368828	82.3939	279.252	1.44552	165.495	0.415523	67.9277	239.226	1.42926	181.888	0.371086	71.7695	259.966	1.4408	165.126	0.355138	66.9393	237.913	1.42099	162.601	0.37745	78.9463	231.054	1.47714	152.35	0.602492	75.8862	225.042	1.44446	135.332	5.48462	61.7152	195.481	1.40789	153.524	0.407025	68.5087	216.145	1.43706	139.227	25.4903	58.088	200.077
1.40563	206.432	2.57595	76.5778	290.166	1.46707	191.349	0.390192	82.6849	280.723	1.43936	168.667	0.437448	68.1859	242.772	1.4267	183.024	0.392266	71.7555	261.119	1.41983	175.282	0.378434	67.3764	248.871	1.4335	158.867	0.397826	79.0354	227.735	1.48748	149.954	0.644057	76.1883	223.054	1.42668	140.903	5.50835	61.8275	201.023	1.39442	158.941	0.428438	68.7877	221.631	1.44418	137.261	25.5099	58.2482	198.23
1.40656	206.126	2.59908	76.6371	289.929	1.47314	188.441	0.411699	82.5722	277.6	1.43516	170.842	0.460035	68.3494	245.186	1.42854	182.092	0.413957	71.7224	260.125	1.43507	168.117	0.401565	67.1835	241.259	1.42331	162.398	0.419001	79.2051	231.142	1.48025	152.348	0.665061	76.338	225.513	1.42135	143.226	5.53364	62.0972	203.575	1.38834	161.953	0.449123	69.1063	224.846	1.44943	135.891	25.5297	58.3805	196.964
1.40141	209.532	2.62118	76.8254	293.641	1.47644	187.244	0.434228	82.6707	276.454	1.43534	170.923	0.482256	68.4122	245.334	1.42942	182.317	0.436031	71.9695	260.609	1.42871	171.347	0.422688	67.385	244.804	1.43433	159.173	0.440318	79.3118	228.306	1.48161	152.452	0.685734	76.5881	225.874	1.44118	136.99	5.55909	62.0372	197.427	1.39548	159.855	0.47007	69.3533	223.074	1.45478	134.065	25.5492	58.3186	195.036
1.40481	207.946	2.64587	76.9525	292.124	1.47383	188.955	0.456205	82.9214	278.487	1.42205	178.083	0.505887	68.9156	253.243	1.44226	176.022	0.456692	71.7413	253.871	1.43258	169.956	0.443471	67.4928	243.476	1.4242	162.366	0.461826	79.3245	231.242	1.48626	150.924	0.707129	76.5011	224.313	1.44046	137.754	5.58564	62.2883	198.429	1.40248	156.652	0.490061	69.0597	219.702	1.45219	135.268	25.57	58.4917	196.436
1.41958	200.076	2.66954	76.9921	284.024	1.47742	187.569	0.47778	82.9866	277.118	1.43331	173.03	0.528749	68.9011	248.006	1.44805	174.374	0.478409	72.0827	252.502	1.43054	171.282	0.467155	67.6688	245.027	1.4243	162.691	0.482636	79.4971	231.721	1.49806	147.789	0.728865	76.5981	221.397	1.42173	143.612	5.61268	62.3228	204.177	1.41979	151.539	0.5105	69.0696	215.154	1.44695	136.965	25.5896	58.5072	198.181
1.40664	208.147	2.69232	77.4008	292.788	1.47252	190.146	0.499152	83.1933	279.994	1.43439	172.78	0.551674	68.9888	247.834	1.42297	185.757	0.499563	72.1257	264.326	1.42334	175.307	0.487539	67.9829	249.521	1.42158	163.866	0.504751	79.6435	232.948	1.47399	155.579	0.750247	77.0052	229.323	1.44601	136.104	5.64218	62.2669	196.807	1.4236	149.707	0.530663	69.1581	213.124	1.45902	133.34	25.6095	58.5683	194.545
1.40373	210.324	2.71504	77.5943	295.239	1.47021	191.637	0.521113	83.4031	281.746	1.4383	171.254	0.574208	69.0468	246.315	1.43481	180.18	0.521646	72.0963	258.525	1.42529	174.144	0.509224	67.8874	248.206	1.42503	163.121	0.526339	79.8188	232.453	1.5076	146.906	0.774281	76.8644	221.475	1.44217	137.523	5.6764	62.4129	198.331	1.40826	156.149	0.570502	69.7366	219.898	1.44538	137.725	25.629	58.6176	199.065
1.41563	203.822	2.73852	77.6259	288.536	1.47655	188.904	0.542824	83.3986	278.926	1.44046	170.541	0.597115	69.1318	245.657	1.42394	185.511	0.544785	72.206	264.156	1.43381	170.727	0.533039	68.0088	244.79	1.42463	163.423	0.547818	79.901	232.817	1.50463	149.529	0.796271	76.9704	224.987	1.42202	144.253	5.70138	62.6443	205.131	1.40323	158.201	0.591832	69.8553	221.993	1.45341	135.575	25.6488	58.7888	197.046
1.4096	207.253	2.76174	77.6814	292.144	1.46996	191.95	0.564899	83.4838	282.16	1.44163	170.057	0.619602	69.1325	245.159	1.44146	177.792	0.567909	72.3153	256.281	1.43861	169.064	0.555214	68.1578	243.218	1.42862	162.332	0.569098	79.986	231.911	1.4695	160.223	0.817483	77.5176	235.448	1.44102	138.584	5.72725	62.7152	199.702	1.4055	157.723	0.613393	69.9996	221.681	1.45205	136.165	25.6679	58.8571	197.718
1.40569	210.085	2.78486	77.9146	295.315	1.46083	196.351	0.586346	83.5994	286.836	1.43162	175.265	0.642512	69.4913	250.912	1.42121	187.986	0.592023	72.6538	267.168	1.43965	169.126	0.578806	68.3587	243.483	1.43106	161.586	0.59119	79.9969	231.24	1.47281	157.05	0.839692	77.55	231.304	1.42213	145.166	5.75227	63.0573	206.445	1.42138	152.135	0.634694	69.9341	216.242	1.44858	137.325	25.6878	58.8842	198.926
1.40985	208.002	2.80901	78.0081	293.251	1.4816	186.473	0.609193	83.2664	276.278	1.43092	176.295	0.665351	69.7777	252.264	1.4349	181.342	0.617858	72.5659	260.207	1.44816	165.696	0.601015	68.3827	239.954	1.44146	158.619	0.612543	80.1043	228.643	1.4927	151.128	0.861858	77.5351	225.589	1.42248	145.265	5.77691	63.138	206.637	1.43517	147.768	0.656557	69.9608	212.071	1.45124	136.669	25.7067	58.9702	198.34
1.40296	212.318	2.83223	78.1625	297.874	1.44477	203.453	0.621	83.3638	293.942	1.42894	177.873	0.689785	70.0535	254.171	1.42363	186.459	0.64422	72.5133	265.447	1.44536	167.201	0.624349	68.535	241.665	1.44677	157.319	0.634824	80.248	227.604	1.48408	153.752	0.882904	77.5949	228.18	1.42778	143.463	5.80477	63.102	204.833	1.43651	147.84	0.677547	70.1933	212.373	1.46114	133.819	25.7265	59.0592	195.529
1.40635	210.652	2.85546	78.2642	296.249	1.43797	209.417	0.637838	84.3767	301.136	1.42234	181.648	0.713425	70.3401	258.365	1.42164	188.373	0.667233	72.8862	267.798	1.43639	171.571	0.646776	68.7884	246.443	1.43511	161.077	0.656464	80.3675	231.163	1.48574	153.873	0.906093	77.9076	228.616	1.44225	139.385	5.82948	63.2351	201.027	1.43576	148.064	0.699236	70.1906	212.584	1.43727	142.029	25.7459	59.2883	204.134
1.40918	209.077	2.87906	78.2671	294.627	1.43524	210.696	0.660194	84.3127	302.401	1.43374	175.722	0.73609	70.0473	251.94	1.42605	186.011	0.692179	72.781	265.262	1.4392	170.509	0.669924	68.8435	245.396	1.43107	162.448	0.677778	80.4215	232.475	1.49084	152.651	0.928455	78.0382	227.579	1.44633	138.252	5.85835	63.2821	199.958	1.45435	142.745	0.722586	70.3225	207.602	1.44413	139.879	25.7654	59.3514	202.002
1.40571	211.948	2.90378	78.6146	297.937	1.40546	229.124	0.682683	84.8692	322.024	1.43328	176.37	0.759071	70.2224	252.786	1.4424	178.717	0.714415	72.8547	257.781	1.44045	170.321	0.692028	68.9784	245.339	1.43935	160.374	0.700715	80.6654	230.834	1.50902	147.424	0.952313	77.9584	222.467	1.45239	136.559	5.8829	63.316	198.337	1.45752	141.975	0.743646	70.3891	206.931	1.4445	139.92	25.7852	59.4208	202.114
1.4029	213.912	2.93043	78.7399	300.097	1.40209	230.874	0.706365	84.7509	323.705	1.42042	183.205	0.78178	70.5903	260.228	1.42451	186.975	0.737015	72.8757	266.347	1.43727	172.242	0.714975	69.2136	247.558	1.43446	162.076	0.722676	80.7646	232.492	1.47771	157.72	0.973355	78.6163	233.064	1.45191	136.931	5.90862	63.4275	198.812	1.451	144.232	0.765949	70.5694	209.28	1.44619	139.274	25.8058	59.3829	201.418
1.40013	215.676	2.95379	78.7854	301.974	1.41507	222.416	0.732769	84.5371	314.734	1.4448	171.564	0.804837	70.2863	247.875	1.43061	184.816	0.760132	73.1611	264.398	1.43968	171.13	0.737691	69.1779	246.373	1.41812	167.712	0.748873	80.9432	237.836	1.47334	159.022	0.998695	78.5946	234.293	1.41343	149.647	5.93988	63.7365	211.515	1.44323	146.604	0.788029	70.5899	211.582	1.45425	136.837	25.8265	59.4471	198.995
1.4163	206.895	2.97878	78.9302	293.026	1.41884	220.495	0.755403	84.628	312.846	1.43547	176.245	0.827575	70.5618	252.993	1.42482	187.773	0.784007	73.2472	267.544	1.44067	170.969	0.759732	69.2812	246.309	1.44946	157.739	0.770404	80.8674	228.636	1.51135	147.744	1.02186	78.4571	223.293	1.42769	145.453	5.99205	63.9614	207.663	1.43504	149.593	0.814709	70.7981	214.671	1.45526	136.866	25.8463	59.5935	199.176
1.40541	213.273	3.00186	79.0303	299.737	1.4289	215.121	0.7778	84.7285	307.387	1.44017	174.478	0.850412	70.6735	251.278	1.42937	185.969	0.806079	73.3851	265.818	1.43302	174.686	0.782372	69.4537	250.329	1.42795	164.783	0.792542	81.0882	235.301	1.47803	157.741	1.04623	78.6794	233.147	1.45072	138.689	6.0238	64.0728	201.198	1.45179	144.683	0.837929	70.9069	210.05	1.45974	135.402	25.8659	59.5637	197.651
1.4095	211.507	3.02509	79.2453	298.12	1.41367	224.811	0.800436	85.127	317.808	1.42204	184.141	0.877864	71.2496	261.856	1.4314	185.006	0.829149	73.3819	264.819	1.42396	179.181	0.805731	69.6193	255.147	1.426	165.769	0.814282	81.2617	236.386	1.49199	154.102	1.06921	78.9476	229.919	1.42723	146.389	6.05319	64.3687	208.93	1.4585	142.83	0.861263	70.956	208.319	1.44191	141.797	25.8862	59.846	204.458
1.40976	211.706	3.04911	79.386	298.454	1.41439	223.315	0.827746	84.7218	315.854	1.42602	182.806	0.90341	71.4633	260.685	1.41703	190.892	0.852649	73.5415	270.499	1.42355	179.559	0.829032	69.6887	255.612	1.42489	166.353	0.836516	81.3729	237.035	1.53859	141.502	1.09129	78.8809	217.714	1.42623	146.889	6.08171	64.3925	209.498	1.44992	145.667	0.883908	71.116	211.206	1.45024	138.682	25.9061	59.6853	201.121
1.4009	217.109	3.07265	79.4873	304.148	1.41591	222.671	0.84958	84.812	315.282	1.42669	182.583	0.929004	71.5007	260.489	1.44292	180.335	0.875344	73.6059	260.208	1.42311	180.088	0.873196	69.8187	256.284	1.43137	164.269	0.86074	81.3769	235.13	1.50522	150.573	1.11243	79.0665	226.645	1.42878	146.095	6.10944	64.3438	208.738	1.43613	150.146	0.909795	71.2298	215.629	1.45659	137.303	25.9274	59.9651	199.994
1.40988	212.325	3.09618	79.6454	299.351	1.43634	211.494	0.872077	84.883	303.778	1.42536	183.601	0.952829	71.6521	261.699	1.43833	182.844	0.898486	73.7933	262.99	1.43016	176.644	0.895687	69.7289	252.629	1.44295	160.723	0.882106	81.3964	231.914	1.50707	150.236	1.13551	79.1616	226.416	1.46404	135.481	6.13856	64.9957	198.35	1.45805	143.715	0.932593	71.3315	209.544	1.43369	145.25	25.9478	60.1115	208.244
1.40566	214.987	3.12045	79.7306	302.2	1.41325	224.772	0.895985	85.0206	317.66	1.4241	184.219	0.97785	71.6647	262.347	1.45225	176.198	0.923894	73.5606	255.884	1.42736	178.359	0.919635	69.9022	254.583	1.42537	166.821	0.903748	81.6772	237.781	1.5252	145.468	1.15938	79.2083	221.867	1.41375	152.506	6.16513	64.7421	215.606	1.40573	161.021	0.954875	71.4946	226.353	1.45854	136.531	25.9675	59.8917	199.136
1.40738	214.327	3.14492	79.8622	301.64	1.40131	231.836	0.919176	84.9216	324.874	1.42452	184.83	1.00245	71.9784	263.294	1.43856	183.312	0.946786	74.0244	263.704	1.42055	180.359	0.947976	69.4453	256.209	1.43223	164.569	0.925631	81.6577	235.701	1.50059	152.691	1.18473	79.5013	229.126	1.43638	144.466	6.19384	64.8996	207.509	1.41706	156.5	0.977401	71.2653	221.77	1.43764	144.046	25.9871	60.1805	207.087
1.40475	216.316	3.16766	80.0229	303.87	1.41923	220.578	0.947573	84.7542	313.052	1.42652	184.268	1.02769	72.1298	262.863	1.43223	186.351	0.969242	74.0723	266.899	1.42673	178.862	0.97906	69.9723	255.188	1.43445	163.779	0.947527	81.6129	234.933	1.52472	146.214	1.20935	79.5484	222.937	1.45593	138.953	6.21938	65.0843	202.306	1.39447	164.019	0.999116	72.2786	228.72	1.4498	140.259	26.0096	60.3113	203.348
1.40761	214.962	3.19098	80.1392	302.581	1.40569	230.374	0.996754	85.4012	323.833	1.41996	187.991	1.0538	72.3543	266.941	1.43079	186.795	0.993037	73.9771	267.264	1.44149	172.039	1.00257	69.8577	247.992	1.43123	165.176	0.969394	81.8009	236.405	1.52899	145.487	1.2326	79.7519	222.448	1.41076	153.799	6.24811	65.2041	216.974	1.37949	172.742	1.0202	72.1705	238.297	1.43618	145.165	26.0296	60.4358	208.483
1.40456	216.832	3.21446	80.1801	304.552	1.41388	224.641	1.02243	85.1124	317.615	1.42574	185.344	1.08131	72.4024	264.252	1.42657	189.34	1.0172	74.184	270.106	1.43319	175.225	1.02701	69.6952	251.131	1.43456	164.532	0.994803	82.0026	236.03	1.53222	144.823	1.26255	79.8326	221.9	1.43989	144.433	6.27408	65.1448	207.967	1.40616	162.061	1.04128	72.0299	227.883	1.4474	141.391	26.0495	60.45	204.65
1.40553	216.577	3.23842	80.3013	304.405	1.41286	225.511	1.04605	85.213	318.616	1.42176	187.669	1.10642	72.5654	266.82	1.43707	184.384	1.04143	74.1867	264.973	1.42956	177.408	1.04969	69.9211	253.616	1.42141	169.085	1.01821	82.1493	240.338	1.50798	151.787	1.28531	80.1167	228.891	1.44921	141.458	6.29923	65.1223	205.002	1.37581	174.975	1.0634	72.4607	240.733	1.46007	137.3	26.0694	60.4404	200.468
1.4009	219.545	3.26238	80.3803	307.56	1.42083	220.327	1.06881	85.0113	313.047	1.42298	187.353	1.13154	72.6737	266.6	1.42154	192.681	1.06424	74.5337	273.902	1.43978	172.116	1.07785	69.5894	247.809	1.41487	172.026	1.04002	82.4985	243.395	1.5313	145.408	1.30993	80.0348	222.664	1.46025	138.199	6.32561	65.5138	201.805	1.36255	180.454	1.08506	72.3373	245.877	1.43804	145.6	26.0891	60.8848	209.378
1.40798	215.861	3.28675	80.5568	303.928	1.41238	225.961	1.09274	85.2732	319.143	1.41795	190.354	1.15818	72.8817	269.913	1.44007	184.048	1.08681	74.6016	265.043	1.41803	182.9	1.10248	69.9785	259.359	1.42852	167.186	1.06296	82.3649	238.829	1.5265	147.033	1.3329	80.2388	224.446	1.43976	145.16	6.35042	65.6541	208.994	1.36865	178.325	1.10594	72.5741	244.065	1.42964	148.395	26.1094	60.8108	212.151
1.40843	215.076	3.31042	80.3642	302.92	1.40041	234.516	1.14184	85.7025	328.42	1.41997	189.667	1.18399	73.0048	269.321	1.43272	187.736	1.11037	74.7202	268.972	1.42946	177.382	1.12492	69.8979	253.56	1.41918	170.836	1.08553	82.6333	242.447	1.52334	147.775	1.35542	80.1937	225.11	1.44054	145.212	6.37641	65.5336	209.183	1.38058	172.686	1.12704	72.3375	238.407	1.45331	140.188	26.1306	60.7701	203.737
1.41419	212.507	3.33446	80.6271	300.524	1.40264	232.525	1.16502	85.4948	326.148	1.42801	185.862	1.20976	73.03	265.412	1.42702	190.348	1.13419	74.6716	271.631	1.4428	171.168	1.15302	69.7259	246.962	1.41458	172.504	1.10988	82.6792	244.022	1.52593	147.453	1.38001	80.392	225.003	1.44483	144.414	6.42545	65.8877	208.653	1.39209	168.212	1.14871	72.4037	234.167	1.45351	140.591	26.1507	60.9692	204.351
1.3975	223.079	3.35758	80.9164	311.753	1.40167	233.585	1.18891	85.6553	327.408	1.41669	191.849	1.23397	73.2093	271.79	1.44355	182.589	1.15761	74.6481	263.576	1.43352	175.429	1.17695	69.8406	251.481	1.44218	163.15	1.1317	82.5095	235.292	1.53034	144.873	1.4045	79.884	221.706	1.4601	139.361	6.45101	65.6463	203.481	1.36821	180.817	1.1699	72.7636	247.394	1.46593	136.456	26.1711	60.8725	200.036
1.39818	223.527	3.38155	81.2292	312.532	1.42105	221.713	1.21213	85.5949	315.064	1.42046	190.563	1.25895	73.4428	270.687	1.43954	184.894	1.18004	74.8485	266.162	1.427	178.064	1.20113	69.7255	254.096	1.45089	161.069	1.15331	82.8007	233.693	1.48348	160.895	1.42785	80.3534	238.685	1.43949	146.453	6.47743	66.0622	210.818	1.36053	188.627	1.19186	72.9167	256.632	1.46198	137.921	26.1906	60.9767	201.637
1.40225	221.271	3.4056	81.3136	310.277	1.394	238.668	1.23395	85.6822	332.701	1.42193	189.93	1.28383	73.4811	270.068	1.4434	183.32	1.20322	74.9187	264.605	1.42074	181.786	1.23235	70.025	258.271	1.42939	168.094	1.17611	82.9496	240.271	1.50417	155.79	1.449	80.9175	234.334	1.4181	153.9	6.50181	66.235	218.246	1.37883	180.734	1.21423	73.1763	249.201	1.46789	136.271	26.2112	61.0587	200.03
1.40746	218.507	3.43019	81.435	307.539	1.41014	228.153	1.25887	85.6028	321.728	1.41433	194.005	1.30823	73.5784	274.386	1.43128	189.521	1.22582	75.1551	271.259	1.4407	172.723	1.26069	69.9862	248.841	1.44435	163.299	1.19896	82.9266	235.862	1.44687	176.58	1.47572	81.0898	255.488	1.44368	145.251	6.52774	66.1105	209.696	1.38488	177.514	1.23575	72.9457	245.834	1.45197	141.791	26.2322	61.2734	205.876
1.40919	217.692	3.45365	81.5101	306.77	1.40745	230.31	1.28182	85.7878	324.149	1.41849	192.226	1.33765	73.7098	272.67	1.43098	190.305	1.24893	75.4062	272.323	1.42753	177.969	1.28686	69.7816	254.055	1.42902	168.822	1.22065	83.2504	241.249	1.43895	179.589	1.501	81.0968	258.42	1.42191	153.336	6.55461	66.5404	218.03	1.37529	182.493	1.25696	73.2398	250.98	1.44578	144.033	26.2521	61.3476	208.24
1.40334	221.751	3.47691	81.7296	311.191	1.39935	236.223	1.30412	86.0769	330.559	1.42662	188.592	1.3628	73.8487	269.049	1.44313	184.438	1.27071	75.3259	266.167	1.42562	179.256	1.31073	69.9492	255.549	1.40747	176.306	1.24236	83.304	248.145	1.50097	158.775	1.52442	81.2352	238.317	1.44743	145.39	6.57965	66.5676	210.441	1.38822	176.811	1.27858	73.2499	245.453	1.45875	139.87	26.2721	61.3896	204.035
1.40568	220.585	3.50074	81.8164	310.072	1.40115	234.708	1.33176	85.9474	328.861	1.42574	189.505	1.38665	74.0368	270.186	1.43377	189.152	1.29882	75.4856	271.2	1.44226	172.059	1.33815	69.9935	248.154	1.42625	169.933	1.265	83.3506	242.368	1.45191	175.458	1.55079	81.4198	254.749	1.44149	146.944	6.60513	66.8042	211.818	1.38544	179.702	1.29867	73.2069	248.967	1.45082	142.605	26.2922	61.4604	206.894
1.42051	211.844	3.52364	81.7064	300.925	1.40478	232.626	1.35635	86.033	326.789	1.42148	191.906	1.41153	74.1554	272.789	1.4293	191.131	1.32558	75.4111	273.183	1.41639	183.565	1.37218	69.9196	260	1.45092	162.307	1.28707	83.4413	235.496	1.43001	184.838	1.60362	81.6719	264.319	1.42636	152.394	6.63178	66.8404	217.37	1.36775	193.006	1.32353	73.629	263.985	1.44571	144.583	26.3133	61.5762	209.025
1.41621	215.113	3.54702	82.0507	304.645	1.40613	118.141	1.40597	43.8522	166.121	1.42376	191.013	1.43546	74.2525	271.958	1.41801	197.889	1.35084	75.8566	280.608	1.41843	183.852	1.39751	70.4157	260.781	1.42693	169.88	1.30891	83.4348	242.408	1.47321	168.278	1.62673	81.5449	247.907	1.43295	150.281	6.65731	67.0892	215.346	1.39169	181.334	1.3451	73.5245	252.361	1.45018	143.265	26.333	61.6494	207.76
1.41905	213.664	3.5705	82.1061	303.201	1.40599	118.235	1.42882	43.8706	166.237	1.42318	191.648	1.46173	74.3829	272.749	1.42436	195.256	1.37339	76.0803	278.115	1.42675	178.913	1.42554	70.0072	255.263	1.42578	170.916	1.33026	83.7528	243.69	1.46746	170.358	1.65047	81.6048	249.994	1.43163	151.274	6.68427	67.216	216.569	1.37024	195.676	1.36576	73.5282	268.122	1.44357	145.913	26.3525	61.8257	210.636
1.42507	210.948	3.59372	82.3346	300.616	1.42283	113.354	1.45299	43.9692	161.284	1.4287	189.248	1.48647	74.4978	270.378	1.42338	195.709	1.39685	76.0652	278.568	1.42463	180.772	1.44843	70.3695	257.533	1.42785	170.267	1.3517	83.7729	243.117	1.46802	170.72	1.67694	81.8723	250.62	1.41835	156.103	6.70915	67.415	221.408	1.37516	191.989	1.38718	73.8761	264.016	1.44248	146.389	26.373	61.8725	211.164
1.43193	206.54	3.61676	82.0284	295.75	1.40444	119.074	1.47496	43.9912	167.232	1.42869	189.245	1.51479	74.4988	270.374	1.4185	198.353	1.41932	76.1255	281.364	1.42557	179.832	1.47156	70.1728	256.363	1.43826	166.969	1.37398	83.8154	240.144	1.44395	179.479	1.70178	81.8957	259.16	1.42857	153.044	6.73534	67.4181	218.634	1.40574	175.172	1.40879	73.4876	246.246	1.45235	143.395	26.3935	62.0192	208.26
1.41976	214.402	3.64012	82.5407	304.398	1.40951	117.791	1.5023	44.1208	166.027	1.41869	195.302	1.53941	74.9297	277.074	1.45053	185.531	1.44451	75.8502	269.117	1.43579	175.168	1.50017	70.1309	251.505	1.42497	172.136	1.39719	84.2162	245.287	1.43805	182.038	1.72438	82.0288	261.78	1.43045	152.417	6.76201	67.5541	218.026	1.38773	185.427	1.43333	73.6844	257.323	1.45803	141.529	26.4137	62.0183	206.354
1.42256	213.28	3.66344	82.7096	303.403	1.41817	114.927	1.52508	44.0428	162.986	1.42505	192.215	1.56399	74.9665	273.917	1.42763	194.593	1.46783	76.4594	277.807	1.41428	185.366	1.52712	70.228	262.16	1.41735	174.693	1.41912	84.1943	247.6	1.45803	174.382	1.7604	81.9193	254.254	1.42304	155.24	6.7874	67.4166	220.913	1.38726	185.587	1.45467	73.6695	257.458	1.46134	140.66	26.434	62.1031	205.553
1.43025	208.943	3.68806	82.6318	298.841	1.40982	117.774	1.55023	44.1544	166.041	1.43114	189.76	1.58994	75.1608	271.572	1.42244	197.167	1.4935	76.4535	280.458	1.41633	184.612	1.55517	70.3117	261.471	1.42296	173.189	1.44208	84.3999	246.441	1.46492	172.395	1.78319	82.1419	252.544	1.44161	148.785	6.81432	67.8976	214.489	1.39292	183.03	1.4754	73.6894	254.945	1.44607	146.211	26.4538	62.3204	211.431
1.43828	204.747	3.71133	82.617	294.483	1.41277	116.834	1.57357	44.1437	165.059	1.43203	189.555	1.61364	75.255	271.45	1.44474	185.79	1.51664	76.1887	268.417	1.43696	175.07	1.5826	70.2941	251.568	1.43339	169.848	1.46418	84.4662	243.459	1.45489	175.505	1.81579	81.734	255.341	1.42762	153.711	6.83986	67.9185	219.441	1.39246	184.022	1.49632	73.9978	256.243	1.44631	146.298	26.4734	62.392	211.592
1.42881	209.883	3.73537	82.704	299.882	1.40829	118.419	1.596	44.2067	166.768	1.4493	181.516	1.6384	75.1949	263.072	1.43776	189.503	1.53806	76.3779	272.459	1.42021	182.659	1.60837	70.2921	259.414	1.4265	172.667	1.48685	84.7323	246.31	1.42951	187.115	1.84843	82.5075	267.484	1.42493	155.379	6.86695	68.0446	221.403	1.37983	189.932	1.51726	73.978	262.073	1.44328	147.458	26.4926	62.4388	212.824
1.44279	202.068	3.76041	82.4521	291.543	1.4122	116.996	1.61836	44.1317	165.222	1.45059	180.881	1.66264	75.1697	262.385	1.43207	192.982	1.56109	76.6883	276.364	1.41589	185.275	1.63612	70.4947	262.329	1.43043	171.208	1.50925	84.6599	244.9	1.4266	185.421	1.87917	82.6071	264.521	1.43449	152.202	6.89287	68.0915	218.333	1.39332	183.323	1.53803	73.8782	255.427	1.44898	145.934	26.5135	62.6295	211.455
1.42456	206.748	3.78391	82.9268	294.524	1.40215	120.772	1.6407	44.3445	169.34	1.46621	179.664	1.68634	74.8514	263.425	1.42989	194.543	1.58413	76.8846	278.176	1.41226	187.049	1.66423	70.4928	264.162	1.42589	173.288	1.53205	84.9333	247.089	1.44001	189.971	1.90749	82.8483	273.56	1.45431	146.29	6.95763	68.2113	212.751	1.37431	83.8336	1.58037	36.6724	115.214	1.44941	145.841	26.5338	62.6497	211.383
1.41275	210.927	3.8073	83.1266	297.988	1.39778	122.228	1.66294	44.3461	170.848	1.43981	186.305	1.71415	75.408	268.243	1.43922	189.955	1.60663	76.8408	273.387	1.41958	183.642	1.68705	70.5582	260.694	1.43087	171.613	1.55398	84.935	245.557	1.43992	185.042	1.94313	82.5708	266.446	1.45767	145.541	6.98285	68.393	212.15	1.3812	83.77	1.60295	36.8666	115.703	1.45289	144.916	26.5542	62.7585	210.547
1.43851	205.608	3.83067	83.0053	295.768	1.40129	121.397	1.68554	44.4705	170.113	1.43534	189.89	1.73895	76.0132	272.557	1.43816	190.303	1.62772	76.7753	273.685	1.42319	181.829	1.71279	70.5152	258.777	1.42998	172.397	1.57563	85.1735	246.525	1.46872	182.863	1.97976	82.5621	268.574	1.42015	158.202	7.00766	68.6613	224.671	1.37661	80.5284	1.62524	36.8783	110.856	1.45612	144.145	26.5743	62.8875	209.892
1.43175	209.44	3.85445	83.1418	299.866	1.4118	117.747	1.71073	44.3773	166.235	1.44924	183.05	1.76492	75.8238	265.283	1.44065	189.988	1.64965	77.1225	273.706	1.4104	95.861	1.79396	35.951	135.202	1.43009	172.662	1.59734	85.3232	246.922	1.45576	188.307	2.04126	82.7454	274.129	1.41118	162.051	7.03276	68.7229	228.683	1.38642	82.83	1.64624	36.8859	114.837	1.45314	144.914	26.5937	62.7914	210.58
1.41599	212.73	3.87966	82.625	301.225	1.41812	116.164	1.73673	44.5153	164.734	1.43601	190.032	1.79091	76.2001	272.887	1.43696	192.044	1.67358	77.2574	275.96	1.42244	92.8504	1.83468	35.924	132.074	1.45872	163.417	1.61967	85.2341	238.38	1.45741	184.954	2.07008	83.2522	269.554	1.43692	153.203	7.05844	68.9181	220.14	1.3672	86.777	1.66734	36.9764	118.641	1.46395	141.718	26.6146	62.9395	207.467
1.43239	208.951	3.90363	83.0837	299.3	1.40865	119.094	1.76034	44.5063	167.762	1.44587	185.322	1.81802	76.1399	267.952	1.42053	200.678	1.69618	77.4279	285.07	1.4224	92.8392	1.86218	35.9264	132.055	1.44384	168.497	1.64167	85.4828	243.283	1.46011	189.283	2.0946	83.2189	276.374	1.41998	159.475	7.08372	68.8209	226.452	1.36384	87.6213	1.68724	37.0388	119.502	1.45314	145.63	26.6349	63.1017	211.621
1.39853	226.745	3.92773	83.2057	317.11	1.40133	121.801	1.78473	44.6301	170.684	1.45704	180.321	1.86575	76.1006	262.736	1.43101	195.83	1.7195	77.6144	280.235	1.42413	92.4959	1.88574	35.9615	131.726	1.45069	166.382	1.66371	85.5022	241.368	1.45014	191.224	2.12288	83.425	277.303	1.4355	153.884	7.11096	69.0375	220.9	1.39054	79.2459	1.70917	36.9161	110.195	1.44277	149.88	26.6592	63.3906	216.242
1.4026	226.546	3.95221	83.329	317.754	1.40292	121.375	1.80963	44.6681	170.279	1.44237	187.867	1.89045	76.5259	270.975	1.43704	192.587	1.7414	77.4881	276.755	1.42177	93.3321	1.90701	36.0658	132.696	1.47046	160.615	1.68539	85.5782	236.178	1.44615	196.58	2.15394	83.6207	284.284	1.44423	151.506	7.13745	69.2728	218.81	1.37827	84.5428	1.73121	36.9625	116.523	1.46195	142.865	26.6788	63.1619	208.861
1.39245	232.56	3.97542	83.1725	323.828	1.40834	119.771	1.83415	44.7269	168.677	1.44679	185.219	1.91622	76.2688	267.973	1.43784	192.769	1.76386	77.7153	277.172	1.42547	92.4153	1.93495	36.0492	131.736	1.46651	162.092	1.71185	85.7482	237.709	1.45898	192.42	2.17933	83.7183	280.736	1.43059	156.569	7.16314	69.387	223.985	1.35831	89.002	1.75205	37.1332	120.892	1.45034	147.265	26.6984	63.3991	213.584
1.39469	227.588	4.00146	83.7235	317.415	1.40915	119.704	1.85601	44.7867	168.681	1.43073	193.658	1.94111	76.6323	277.072	1.4441	189.663	1.78711	77.6453	273.892	1.42159	93.614	1.95847	36.1571	133.081	1.4621	163.726	1.73518	85.9287	239.385	1.45348	195.334	2.21091	83.6455	283.914	1.44007	153.494	7.21568	69.3248	221.042	1.36414	91.3662	1.77253	37.1536	124.636	1.4533	146.548	26.7187	63.524	212.979
1.40383	226.675	4.02428	83.2873	318.213	1.40409	121.862	1.8793	44.9872	171.105	1.46342	176.862	1.96482	75.7674	258.823	1.43286	195.89	1.80948	77.998	280.682	1.40895	96.7534	1.98908	36.1394	136.321	1.46064	164.388	1.75865	86.043	240.11	1.45555	194.686	2.23494	83.7046	283.376	1.44336	152.546	7.24063	69.3741	220.179	1.39496	80.7543	1.79399	36.8639	112.649	1.45278	147.089	26.7386	63.6798	213.688
1.40328	226.539	4.04898	83.49	317.898	1.39696	124.222	1.90436	44.9732	173.533	1.42893	194.648	1.99107	76.6712	278.137	1.42454	200.076	1.83201	77.9992	285.017	1.41088	96.5998	2.01594	36.2718	136.29	1.46159	164.437	1.78492	86.2152	240.338	1.43883	204.162	2.27581	84.1836	293.754	1.42805	158.308	7.26756	69.6555	226.072	1.38225	76.5969	1.81516	36.9336	105.876	1.43894	152.163	26.7585	63.7735	218.954
1.41585	219.935	4.07088	83.4301	311.393	1.39638	124.793	1.92781	45.1054	174.257	1.44225	190.152	2.02068	76.107	274.247	1.42028	202.373	1.8548	78.034	287.427	1.42355	93.0638	2.03801	36.1293	132.481	1.4754	160.423	1.80698	86.2362	236.687	1.44523	199.753	2.30783	84.1677	288.688	1.42833	158.525	7.29327	69.7929	226.425	1.38101	84.0882	1.83569	36.9918	116.127	1.43687	153.275	26.7794	63.925	220.236
1.40828	225.838	4.09731	83.2323	318.042	1.4083	120.648	1.95241	45.0494	169.909	1.43076	193.523	2.04688	76.5831	276.885	1.43536	195.257	1.87872	78.2379	280.263	1.43751	89.8199	2.06122	36.1243	129.117	1.47962	159.359	1.82973	86.3084	235.79	1.41675	100.456	2.39852	41.4445	142.322	1.44979	151.253	7.32043	69.7322	219.285	1.40142	79.3299	1.85671	37.0146	111.175	1.44566	150.231	26.8	63.9737	217.184
1.39662	230.506	4.11918	83.7732	321.93	1.4196	117.305	1.97436	45.1186	166.527	1.42308	195.147	2.07474	76.8679	277.709	1.44146	192.162	1.9024	78.1647	276.993	1.42731	92.719	2.08468	36.3442	132.339	1.46673	163.461	1.85259	86.5127	239.752	1.41893	100.073	2.4216	41.4264	141.996	1.43075	157.834	7.34483	69.8502	225.822	1.38985	83.4807	1.87844	37.1227	116.026	1.4544	147.495	26.8201	64.0946	214.516
1.39411	231.363	4.14155	83.8581	322.545	1.40123	123.665	1.99666	45.2972	173.284	1.43782	190.644	2.10068	76.795	274.113	1.42079	203.501	1.92597	78.5657	289.131	1.41922	94.6742	2.10861	36.3447	134.363	1.47565	161.069	1.87509	86.624	237.681	1.42838	98.6016	2.45069	41.4018	140.841	1.44168	154.842	7.37264	70.1751	223.232	1.38347	84.538	1.90041	37.0542	116.956	1.46512	143.962	26.8398	64.1043	210.921
1.41037	222.823	4.1691	83.312	314.264	1.42044	117.311	2.02528	45.2212	166.632	1.42884	194.629	2.13344	76.6402	278.094	1.43514	196.284	1.94874	78.6058	281.695	1.42265	93.8161	2.13197	36.3369	133.468	1.46024	165.708	1.89703	86.6729	241.974	1.41375	100.97	2.47414	41.4951	142.746	1.4179	163.238	7.39782	70.2172	231.455	1.37483	86.578	1.92224	37.2007	119.03	1.46111	145.2	26.8598	64.0772	212.154
1.39989	228.178	4.19326	83.3137	319.425	1.40491	122.559	2.04767	45.3427	172.184	1.42992	194.444	2.15825	76.7854	278.039	1.44392	191.872	1.97036	78.5165	277.046	1.41334	96.7872	2.15774	36.5826	136.793	1.47657	160.954	1.91899	86.6998	237.66	1.42314	99.5532	2.5039	41.4895	141.678	1.43338	157.987	7.42324	70.3239	226.455	1.40681	77.6526	1.94329	37.1203	109.242	1.45419	148.001	26.8798	64.2885	215.222
1.38482	234.606	4.21749	83.8796	324.886	1.41043	120.663	2.07261	45.3116	170.186	1.41926	198.419	2.18446	77.0111	281.608	1.44409	192.188	1.99836	78.6768	277.537	1.41349	96.673	2.17979	36.5592	136.646	1.48482	158.77	1.94114	86.7815	235.745	1.43028	98.4888	2.53014	41.4808	140.867	1.44121	155.476	7.44869	70.3803	224.073	1.3833	85.0292	1.96444	37.2533	117.621	1.46958	142.498	26.8999	64.0881	209.412
1.3924	230.233	4.26341	83.7677	320.576	1.40456	123.174	2.09522	45.5298	173.006	1.41616	202.06	2.21097	77.1319	286.15	1.43338	197.987	2.02052	78.9355	283.791	1.40601	98.9164	2.20099	36.6616	139.077	1.47041	161.681	1.96697	86.1352	237.737	1.41473	101.299	2.55309	41.7247	143.312	1.42926	159.865	7.47351	70.5166	228.488	1.38784	84.0296	1.98492	37.1955	116.619	1.45458	148.112	26.9207	64.3934	215.441
1.39499	230.695	4.28678	83.8247	321.817	1.39834	125.284	2.11748	45.5326	175.19	1.41495	203.613	2.23971	76.9225	288.103	1.44036	195.047	2.0435	79.126	280.938	1.42369	93.6564	2.22827	36.369	133.338	1.43988	172.167	1.98792	86.694	247.901	1.39087	105.473	2.57704	41.8605	146.699	1.46505	148.319	7.49862	70.5682	217.295	1.37561	86.6166	2.00589	37.2829	119.15	1.4468	151.176	26.9405	64.5474	218.722
1.38902	232.428	4.31349	84.1151	322.847	1.41683	119.298	2.14747	45.5594	169.025	1.42747	196.971	2.27252	76.9063	281.17	1.438	196.698	2.06536	79.3309	282.851	1.4075	98.5033	2.25952	36.6503	138.643	1.41888	179.407	2.00828	86.734	254.557	1.4011	103.683	2.61073	41.8199	145.27	1.44189	156.1	7.52333	70.7711	225.079	1.39693	81.2139	2.02814	37.3577	113.451	1.45244	149.616	26.9623	64.7326	217.309
1.403	227.616	4.33718	83.8201	319.346	1.40669	122.915	2.17043	45.6947	172.902	1.42408	199.409	2.30181	76.8071	283.974	1.43809	196.641	2.08734	79.3233	282.787	1.43009	92.4266	2.28118	36.4872	132.179	1.41918	180.223	2.02945	87.1805	255.769	1.40932	102.421	2.64788	41.7599	144.344	1.4229	163.07	7.54816	70.9323	232.033	1.40404	79.9476	2.05824	37.3377	112.25	1.45603	148.488	26.9822	64.7691	216.203
1.40158	228.999	4.36001	84.0075	320.962	1.4101	121.77	2.19314	45.6871	171.708	1.4161	201.611	2.32961	76.8302	285.5	1.4372	197.306	2.10945	79.414	283.568	1.43328	91.5375	2.30168	36.4189	131.199	1.39981	188.113	2.04994	87.5066	263.322	1.40942	102.718	2.67909	41.9214	144.772	1.43672	157.893	7.57247	70.7914	226.848	1.40117	79.0617	2.07934	37.3485	110.779	1.46096	147.222	27.0019	64.9455	215.085
1.40828	226.252	4.38267	83.7659	318.627	1.40722	122.778	2.21519	45.7058	172.776	1.41233	200.533	2.36276	77.1739	283.22	1.44007	196.078	2.13373	79.4883	282.364	1.41543	96.2793	2.32311	36.597	136.277	1.42928	176.783	2.07139	87.2238	252.672						1.44859	154.248	7.59773	70.9321	223.442	1.40684	79.7511	2.10033	37.4713	112.197	1.45794	148.187	27.0213	64.9219	216.049
1.3973	231.667	4.40354	83.9653	323.709	1.40438	123.997	2.24119	45.8196	174.139	1.4139	198.249	2.38937	77.411	280.305	1.43758	197.639	2.15549	79.6264	284.122	1.41212	97.5991	2.34786	36.7737	137.821	1.39779	189.427	2.09154	87.7504	264.778						1.44706	155.271	7.62323	71.1672	224.686	1.39767	79.9898	2.12076	37.5055	111.799	1.44375	153.608	27.0413	65.121	221.772
1.40677	225.998	4.42653	84.073	317.928	1.41047	122.325	2.26355	45.9341	172.535	1.41479	202.029	2.41617	77.1121	285.828	1.44157	195.831	2.17784	79.6802	282.306	1.41043	98.103	2.36913	36.7975	138.367	1.38724	193.548	2.1167	87.6963	268.497						1.44443	156.092	7.64972	71.157	225.465	1.39152	82.7206	2.14201	37.6013	115.108	1.45183	150.822	27.0616	65.1555	218.968
1.41754	227.383	4.4484	83.9741	322.324	1.40847	122.944	2.28833	45.929	173.162	1.41209	200.695	2.44165	77.1913	283.399	1.43827	197.855	2.20025	79.8485	284.568	1.4241	94.3321	2.39222	36.6772	134.339	1.38066	197.831	2.14135	88.0469	273.138						1.43513	160.038	7.676	71.5092	229.676	1.39686	81.8576	2.16249	37.6444	114.344	1.44696	152.928	27.0815	65.3217	221.28
1.39434	233.545	4.47	84.3272	325.64	1.41093	122.544	2.31058	46.0722	172.901	1.42504	198.153	2.46752	77.0734	282.377	1.43101	201.932	2.22289	80.029	288.968	1.43046	93.2153	2.42778	36.8203	133.341	1.40115	188.491	2.16215	87.5939	264.104						1.42028	165.933	7.70005	71.7532	235.671	1.39042	83.9012	2.18454	37.7026	116.658	1.4552	150.162	27.1045	65.3776	218.514
1.4163	224.373	4.49179	84.0763	317.78	1.40024	126.283	2.33392	46.1363	176.825	1.43002	195.299	2.49415	77.1516	279.282	1.43354	200.753	2.24494	80.0676	287.788	1.43137	92.8762	2.45095	36.7822	132.94	1.40059	189.195	2.18363	87.8211	264.985						1.42745	162.998	7.72547	71.6184	232.671	1.39976	82.4225	2.20565	37.8063	115.371	1.44827	152.803	27.1247	65.469	221.299
1.39672	230.425	4.51337	84.4759	321.839	1.40343	125.183	2.36176	46.1327	175.685	1.42632	197.65	2.52295	77.3406	281.912	1.43708	199.079	2.26739	80.1096	286.092	1.4159	97.0256	2.47455	36.9266	137.379	1.39853	189.985	2.20389	87.8073	265.7						1.45258	154.803	7.75127	71.7814	224.863	1.37185	89.6038	2.22576	37.8632	122.923	1.45265	151.269	27.1448	65.4759	219.741
1.39772	232.323	4.53537	84.3138	324.722	1.40062	126.277	2.38469	46.1774	176.865	1.41764	202.112	2.54886	77.3351	286.522	1.43688	199.471	2.28958	80.2245	286.617	1.41303	97.5927	2.50709	36.8523	137.902	1.40903	185.626	2.22513	87.6644	261.552						1.43493	160.679	7.776	71.7626	230.564	1.40403	83.4019	2.24748	37.9298	117.098	1.44953	152.918	27.166	65.7121	221.66
1.41205	227.301	4.55707	84.2363	320.962	1.40313	125.933	2.40809	46.3729	176.701	1.41307	205.101	2.57657	77.542	289.823	1.43351	201.37	2.31144	80.3104	288.666	1.42967	93.8569	2.53043	37.0135	134.184	1.39546	192.443	2.24607	88.0455	268.546						1.44346	158.25	7.80297	71.9877	228.428	1.40443	83.2261	2.26825	37.8817	116.885	1.44779	153.908	27.1858	65.8731	222.826
1.39322	235.501	4.57903	84.414	328.104	1.41041	123.869	2.43452	46.5127	174.706	1.4198	201.032	2.60478	77.3592	285.425	1.45129	192.345	2.33319	80.1277	279.149	1.42213	95.647	2.55419	36.9985	136.023	1.38581	196.186	2.26766	87.9463	271.876						1.43499	161.393	7.82987	72.0858	231.597	1.41122	81.5325	2.28877	37.9967	115.06	1.45663	150.647	27.2069	65.8101	219.437
1.39313	236.091	4.60846	84.6069	328.906	1.41225	123.114	2.4568	46.4549	173.868	1.40944	204.765	2.63234	77.3378	288.603	1.44548	195.331	2.355	80.2365	282.346	1.42042	96.357	2.57685	37.1078	136.867	1.41454	184.555	2.28946	87.808	261.06						1.44968	156.838	7.85502	72.2802	227.365	1.4094	81.7048	2.30931	37.9306	115.155	1.44436	155.699	27.2295	66.1036	224.885
1.40591	116.857	4.65732	43.3723	164.29	1.41189	123.391	2.48266	46.5207	174.214	1.41274	205.538	2.66158	77.646	290.371	1.44047	197.021	2.37745	79.9452	283.803	1.41462	98.0518	2.59977	37.1921	138.706	1.4085	187.119	2.31118	87.9471	263.557						1.4425	159.759	7.87992	72.5154	230.452	1.40595	82.7525	2.33034	38.1302	116.346	1.46553	148.412	27.2504	66.1558	217.503
1.40433	117.566	4.67977	43.4488	165.103	1.39703	129.032	2.50702	46.7296	180.262	1.41405	204.846	2.68727	77.6489	289.664	1.44148	196.972	2.40023	80.1275	283.931	1.42585	95.2158	2.62249	37.1863	135.764	1.39053	194.594	2.33421	88.1102	270.589						1.4322	163.647	7.90539	72.6477	234.374	1.37053	89.7882	2.35198	38.1947	123.057	1.45822	150.72	27.2699	66.0776	219.783
1.39956	119.434	4.70438	43.5693	167.156	1.40087	127.872	2.52924	46.7959	179.132	1.40821	207.436	2.71533	77.7002	292.114	1.42182	207.197	2.4238	80.2107	294.596	1.43343	93.3585	2.64573	37.1685	133.823	1.38058	201.459	2.35529	88.2402	278.131						1.45864	154.588	7.93159	72.5902	225.489	1.38077	87.8373	2.37398	38.2636	121.283	1.45003	153.953	27.2905	66.2372	223.237
1.39895	119.682	4.73481	43.5884	167.429	1.40073	128.027	2.55264	46.839	179.332	1.41145	205.997	2.74493	77.6313	290.754	1.43161	202.528	2.44769	80.397	289.941	1.43251	93.9472	2.66811	37.3172	134.581	1.39708	193.749	2.37732	87.9209	270.683						1.45242	156.939	7.95751	72.7515	227.941	1.41285	78.853	2.39519	38.1732	111.407	1.44272	157.233	27.3106	66.4971	226.843
1.4023	118.76	4.75856	43.6473	166.538	1.40991	124.775	2.57509	46.7927	175.921	1.4284	202.968	2.77425	77.6832	289.919	1.42435	206.244	2.47036	80.3647	293.763	1.43005	94.7424	2.69105	37.4003	135.487	1.39021	197.555	2.40026	88.3448	274.643						1.44794	158.796	7.98265	72.9198	229.928	1.40752	82.8843	2.41568	38.322	116.662	1.45321	153.462	27.3309	66.5136	223.012
1.40812	116.747	4.78376	43.587	164.394	1.40172	128.105	2.59794	46.9933	179.568	1.41655	205.688	2.80089	77.7183	291.369	1.43559	200.145	2.49725	80.2475	287.327	1.42954	94.7655	2.71407	37.3596	135.471	1.42007	184.41	2.42206	87.7405	261.874						1.46962	152.208	8.00899	73.087	223.687	1.42066	80.6354	2.4385	38.3434	114.555	1.45413	153.34	27.3508	66.6014	222.976
1.4049	117.805	4.8095	43.6012	165.505	1.41136	124.566	2.62149	46.8963	175.807	1.41155	102.342	2.85229	38.5386	144.461	1.42925	203.247	2.52169	80.1945	290.49	1.42589	95.7073	2.73634	37.3823	136.468	1.39548	195.986	2.44318	88.2905	273.496						1.4326	165.453	8.03493	73.5192	237.028	1.38765	86.8526	2.45931	38.4322	120.521	1.45711	152.138	27.3708	66.5331	221.682
1.39856	120.128	4.83481	43.7026	168.007	1.41266	124.381	2.64476	46.9888	175.709	1.41693	101.07	2.87965	38.6024	143.21	1.43044	203.555	2.54434	80.5581	291.173	1.43016	94.845	2.76076	37.4485	135.644	1.40569	191.885	2.46517	88.3192	269.73						1.4534	157.891	8.06211	73.3429	229.478	1.39628	85.3751	2.48103	38.515	119.208	1.45484	153.52	27.3904	66.789	223.348
1.39768	120.428	4.85977	43.7042	168.319	1.40136	128.506	2.66675	47.095	180.084	1.41196	102.622	2.91066	38.683	144.898	1.41719	209.893	2.56985	80.2834	297.459	1.42161	97.2341	2.78409	37.5614	138.228	1.38534	199.903	2.48682	88.115	276.934						1.46453	154.234	8.09199	73.3066	225.88	1.38353	88.0496	2.50201	38.5994	121.819	1.45666	153.22	27.4112	66.9327	223.188
1.39949	120.013	4.88573	43.7729	167.957	1.40585	127.351	2.68988	47.246	179.037	1.42652	98.8672	2.93822	38.7113	141.036	1.42912	203.807	2.59218	80.391	291.266	1.42584	96.1501	2.80757	37.5491	137.095	1.41287	188.478	2.50972	88.0442	266.295						1.48322	148.602	8.12148	73.3182	220.408	1.38623	87.568	2.52409	38.6264	121.39	1.45309	154.226	27.4314	66.8265	224.104
1.39657	121.114	4.91011	43.8178	169.144	1.41037	125.762	2.71399	47.2245	177.371	1.41675	101.292	2.9654	38.6716	143.505	1.43879	199.196	2.61709	80.5006	286.6	1.41072	100.664	2.83208	37.7901	142.009	1.40314	193.497	2.53059	88.2411	271.504						1.47001	152.939	8.14672	73.4997	224.823	1.39603	85.7236	2.54484	38.651	119.673	1.43555	161.428	27.4528	67.1141	231.738
1.41146	116.199	4.93503	43.7715	164.011	1.40156	129.139	2.7373	47.3526	180.995	1.41067	103.569	2.99873	38.9062	146.101	1.43793	200.071	2.64202	80.6825	287.688	1.4257	96.3486	2.85483	37.6148	137.364	1.38969	200.399	2.55171	88.4515	278.492						1.47645	150.999	8.17427	73.5088	222.941	1.38882	87.3583	2.5659	38.7584	121.325	1.45209	155.285	27.4742	67.1307	225.488
1.39611	121.489	4.95914	43.8962	169.612	1.39863	130.499	2.75975	47.4668	182.519	1.41671	101.765	3.02656	38.8492	144.172	1.41538	212.124	2.66539	80.7548	300.235	1.42691	95.8941	2.87813	37.554	136.832	1.39808	196.643	2.57278	88.3764	274.922						1.47626	151.462	8.20077	73.7093	223.597	1.42061	81.5243	2.58678	38.7622	115.815	1.4452	158.328	27.4949	67.357	228.817
1.39482	122.144	4.98387	43.9811	170.37	1.39729	131.206	2.78573	47.5521	183.332	1.41755	101.819	3.05932	38.9495	144.333	1.42304	207.462	2.69153	80.5644	295.227	1.4389	93.5451	2.90097	37.7564	134.602	1.43823	180.407	2.59424	88.0092	259.466						1.45447	158.776	8.22713	73.9172	230.935	1.38136	90.1069	2.60775	38.9364	124.47	1.43636	162.402	27.515	67.6486	233.267
1.40232	119.652	5.00753	43.9703	167.79	1.39674	131.559	2.80927	47.608	183.753	1.42866	99.002	3.08635	38.9751	141.44	1.41836	210.438	2.71367	80.738	298.476	1.43025	95.5825	2.92274	37.7511	136.706	1.40681	195.189	2.62025	88.3058	274.593						1.46107	156.946	8.2531	74.0624	229.309	1.39474	87.3966	2.6283	38.9342	121.896	1.46156	152.468	27.5355	67.3532	222.84
1.40708	118.063	5.03093	43.9497	166.125	1.40456	128.915	2.83716	47.6605	181.07	1.42737	99.3541	3.11283	38.9864	141.815	1.43815	199.277	2.73691	80.4046	286.591	1.42279	97.7611	2.94578	37.8804	139.093	1.40231	199.462	2.64625	88.6688	279.707						1.46343	156.015	8.2791	73.9798	228.318	1.40425	85.6164	2.64896	38.9549	120.227	1.44169	160.164	27.5553	67.5725	230.906
1.41018	117.312	5.05408	44.0356	165.43	1.39934	130.912	2.85929	47.7057	183.191	1.43142	98.6135	3.14	39.0944	141.157	1.41746	211.038	2.75889	80.7767	299.138	1.42855	96.1938	2.96669	37.8245	137.418	1.41901	193.04	2.66683	88.5499	273.926						1.46236	156.557	8.30733	74.0813	228.943	1.39663	87.2772	2.66962	39.0453	121.894	1.45068	157.483	27.5763	67.858	228.457
1.4143	115.964	5.07702	44.0039	164.008	1.39696	132.242	2.88189	47.8784	184.737	1.42527	100.325	3.16736	39.1583	142.991	1.43253	202.326	2.78338	80.4931	289.837	1.43137	95.6124	2.98798	37.8697	136.857	1.40229	200.613	2.68907	88.8202	281.316						1.47699	151.857	8.33661	74.0119	224.291	1.38344	90.2574	2.69239	39.1896	124.866	1.4701	150.36	27.5962	67.7084	221.044
1.39968	121.096	5.1009	44.1889	169.496	1.40356	129.829	2.90381	47.8589	182.223	1.43298	98.4815	3.1938	39.1964	141.122	1.4216	208.385	2.80712	80.6268	296.239	1.43435	95.4032	3.00859	38.0654	136.842	1.41076	196.976	2.70991	88.8053	277.887						1.45681	158.349	8.36403	74.0776	230.685	1.39652	87.4926	2.71453	39.1347	122.185	1.44612	159.141	27.6164	67.8477	230.136
1.3975	122.084	5.12552	44.2806	170.613	1.40246	130.491	2.92641	47.9661	183.008	1.42442	100.907	3.22134	39.2976	143.734	1.42395	206.929	2.82983	80.5532	294.657	1.41842	99.3353	3.03135	38.0584	140.899	1.40424	198.053	2.73109	88.055	278.114						1.42403	168.762	8.39197	74.5165	240.323	1.39153	88.8159	2.73555	39.2811	123.59	1.45289	156.87	27.6368	67.9401	227.914
1.40108	121.035	5.15055	44.3377	169.58	1.40219	130.613	2.95227	47.975	183.144	1.41655	102.955	3.24726	39.2877	145.842	1.41744	211.26	2.86554	80.8434	299.45	1.43478	95.2424	3.05472	38.0502	136.652	1.39157	87.0044	2.77335	39.4366	121.073						1.44374	162.418	8.41625	74.7433	234.49	1.40735	86.5351	2.77885	39.2874	121.785	1.44781	159.092	27.6569	68.0972	230.336
1.39846	121.797	5.17478	44.2934	170.327	1.4197	124.151	2.9781	47.7808	176.257	1.41257	104.392	3.27705	39.4161	147.462	1.41144	212.604	2.88807	80.906	300.078	1.42892	97.2108	3.11786	38.2224	138.907	1.40074	85.7947	2.7919	39.6234	120.176						1.41766	170.948	8.44179	74.3478	242.345	1.40444	87.4606	2.80089	39.4542	122.833	1.45064	158.212	27.6768	68.1691	229.508
1.39543	123.175	5.20025	44.4264	171.882	1.41189	127.708	3.00097	48.1434	180.309	1.41353	104.473	3.30886	39.5469	147.676	1.43043	204.342	2.91089	80.8681	292.296	1.42838	97.3007	3.14275	38.2419	138.983	1.42144	82.3767	2.81285	39.4818	117.094						1.45373	159.998	8.46653	74.3699	232.594	1.41197	85.7375	2.82313	39.3224	121.058	1.45566	156.41	27.6968	68.1759	227.68
1.4002	121.734	5.22576	44.4828	170.451	1.41228	127.681	3.02735	48.1834	180.322	1.41006	105.697	3.34028	39.641	149.039	1.41469	212.81	2.93717	80.8717	301.06	1.42963	97.4003	3.16545	38.4079	139.247	1.40708	84.3965	2.83129	39.4797	118.753						1.44378	163.342	8.49128	74.3422	235.829	1.3853	91.5255	2.84481	39.5368	126.79	1.44085	162.542	27.7171	68.4396	234.199
1.39148	124.861	5.25345	44.54	173.742	1.40068	132.183	3.04996	48.3498	185.145	1.41621	103.819	3.36845	39.5789	147.029	1.4194	209.679	2.96067	80.668	297.618	1.4078	103.121	3.19031	38.4102	145.174	1.39114	87.641	2.85034	39.6911	121.921						1.44941	160.865	8.51732	74.2486	233.159	1.42958	82.5447	2.86806	39.311	118.004	1.44455	161.507	27.7389	68.6094	233.305
1.39131	125.485	5.27937	44.7394	174.588	1.40946	129.204	3.07388	48.3988	182.108	1.4212	102.728	3.39646	39.6761	145.997	1.41747	210.444	2.98451	80.5527	298.298	1.43025	97.1336	3.21208	38.3642	138.926	1.41567	83.1249	2.87081	39.5519	117.678						1.42447	171.5	8.54279	74.8608	244.298	1.40131	88.4271	2.88988	39.6127	123.914	1.44607	161.011	27.7594	68.6392	232.833
1.40215	121.58	5.30773	44.6617	170.474	1.40202	131.695	3.10095	48.35	184.639	1.41064	103.306	3.4249	39.8817	145.727	1.42155	208.639	3.01119	80.7133	296.592	1.4043	104.591	3.23469	38.5956	146.878	1.39799	86.2997	2.90778	39.6358	120.646						1.39106	185.794	8.56952	75.0822	258.451	1.41104	86.7476	2.91098	39.7049	122.405	1.44616	161.267	27.7795	68.7594	233.217
1.40612	120.467	5.33597	44.7371	169.392	1.40223	132.461	3.1257	48.6601	185.741	1.41626	104.509	3.45125	39.8481	148.012	1.42819	204.98	3.03706	80.6589	292.751	1.43551	96.3617	3.259	38.5681	138.328	1.41038	84.1824	2.92608	39.6389	118.73						1.40534	180.194	8.59698	75.3164	253.234	1.42321	84.1863	2.9355	39.5573	119.814	1.46912	152.784	27.7997	68.6527	224.458
1.40016	122.496	5.36087	44.7573	171.514	1.40423	131.594	3.15107	48.6008	184.788	1.42743	101.638	3.47817	39.8895	145.082	1.41393	213.841	3.06304	81.1665	302.356	1.43699	95.7932	3.28153	38.4807	137.654	1.39493	86.8715	2.9449	39.6501	121.18						1.4164	174.237	8.62419	74.6937	246.789	1.41968	85.117	2.9562	39.6926	120.839	1.45932	156.589	27.8198	68.8278	228.513
1.39769	123.606	5.38696	44.8592	172.763	1.41504	127.89	3.17353	48.6163	180.97	1.40953	106.789	3.50458	39.9993	150.523	1.43644	104.855	3.11025	41.5315	150.618	1.42064	100.28	3.30328	38.6438	142.461	1.4188	82.7817	2.96386	39.6316	117.451						1.43709	165.3	8.64905	74.1656	237.551	1.39776	89.7016	2.9779	39.8669	125.381	1.44504	162.473	27.8407	69.0952	234.78
1.40658	120.73	5.41384	44.89	169.815	1.39693	134.934	3.19511	48.85	188.493	1.4127	106.113	3.5403	40.0821	149.906	1.42932	105.081	3.13459	41.4739	150.195	1.41571	101.655	3.32597	38.6737	143.914	1.4189	82.7556	2.98266	39.6261	117.422						1.41003	176.755	8.67594	74.6732	249.229	1.3936	90.77	2.99858	39.9619	126.497	1.4454	162.572	27.8611	69.1969	234.982
1.39952	123.433	5.43851	45.0185	172.747	1.41714	127.822	3.21836	48.8624	181.142	1.41341	106.237	3.56793	40.2058	150.157	1.41392	109.698	3.16004	41.6053	155.104	1.42283	99.9887	3.34867	38.7512	142.267	1.42408	81.9715	3.00173	39.6484	116.734						1.41026	177.443	8.70224	75.0009	250.241	1.40545	88.2521	3.02384	39.8989	124.034	1.44098	164.324	27.882	69.2143	236.788
1.39665	124.572	5.46433	45.0751	173.984	1.41594	128.385	3.24227	48.9274	181.786	1.41005	107.212	3.59428	40.215	151.174	1.42185	107.435	3.18257	41.5974	152.756	1.43066	98.0084	3.37066	38.7514	140.217	1.40375	85.248	3.01999	39.7699	119.667						1.39147	185.363	8.72906	74.986	257.928	1.40911	87.8879	3.0458	40.0579	123.844	1.4667	154.95	27.9031	69.2504	227.266
1.40091	123.157	5.4915	45.0913	172.532	1.41523	128.886	3.26486	49.0219	182.403	1.40633	108.379	3.62142	40.2484	152.416	1.42174	107.604	3.20663	41.6513	152.985	1.41585	102.025	3.39353	38.8269	144.452	1.38707	88.1631	3.03954	39.7515	122.288						1.376	193.546	8.75433	75.3945	266.319	1.39575	90.7026	3.08952	40.1305	126.598	1.45842	158.053	27.9226	69.3264	230.508
1.40446	122.201	5.51759	45.1668	171.626	1.39192	137.68	3.28723	49.1602	191.64	1.41752	105.367	3.65286	40.3101	149.359	1.42135	107.948	3.2304	41.7411	153.432	1.42566	99.677	3.41616	38.9107	142.105	1.40943	84.2331	3.05872	39.746	118.721						1.41166	176.604	8.77998	74.8898	249.304	1.42289	85.7276	3.11044	40.2548	121.981	1.46362	156.318	27.9439	69.3801	228.79
1.3975	124.802	5.54196	45.2613	174.412	1.41021	130.876	3.31027	49.119	184.563	1.42128	104.637	3.67979	40.425	148.719	1.42608	106.437	3.2524	41.6581	151.787	1.40688	105.161	3.43948	39.0763	147.949	1.39897	86.0938	3.0771	39.779	120.443						1.38707	187.754	8.80469	75.1414	260.427	1.37897	96.114	3.13342	40.516	132.538	1.46164	157.431	27.9638	69.5621	230.107
1.39916	124.596	5.56778	45.3944	174.33	1.40178	134.371	3.3328	49.299	188.358	1.40899	108.406	3.70571	40.5465	152.743	1.4247	106.813	3.27462	41.6614	152.177	1.42493	100.3	3.4617	39.0824	142.921	1.39895	85.8165	3.10026	39.8064	120.053						1.40984	177.251	8.83052	74.85	249.896	1.43097	85.3206	3.1536	40.4019	122.091	1.44738	163.044	27.9841	69.7198	235.987
1.4111	120.325	5.59179	45.2727	169.791	1.41389	129.774	3.35613	49.187	183.486	1.40148	110.912	3.7345	40.6552	155.441	1.43285	104.699	3.29697	41.6894	150.018	1.43973	96.6869	3.4827	39.101	139.203	1.39827	86.1532	3.11874	39.9094	120.466						1.40274	180.743	8.85922	75.088	253.534	1.37791	97.8728	3.17421	40.7513	134.86	1.46181	157.662	28.0041	69.6914	230.472
1.40223	123.847	5.61701	45.4964	173.662	1.40564	133.375	3.37884	49.453	187.478	1.40356	110.293	3.76159	40.6564	154.803	1.43855	102.963	3.32051	41.5852	148.117	1.43461	98.1761	3.50511	39.2048	140.844	1.38077	89.5462	3.13816	40.0048	123.643						1.43295	168.434	8.88516	74.8976	241.358	1.37806	97.5185	3.1952	40.6196	134.386	1.44667	163.774	28.0242	69.9174	236.927
1.4028	123.692	5.64236	45.5136	173.515	1.40329	134.482	3.40098	49.5445	188.717	1.41571	106.912	3.78969	40.7085	151.356	1.43889	102.593	3.34497	41.4738	147.62	1.42682	100.135	3.52721	39.2073	142.875	1.41351	83.5004	3.15699	39.8798	118.028						1.40885	178.658	8.91101	75.2726	251.703	1.41573	89.4576	3.21654	40.6316	126.648	1.4431	165.344	28.0444	69.9931	238.608
1.39685	126.22	5.66699	45.6959	176.311	1.4095	131.961	3.42259	49.4306	185.999	1.41809	106.228	3.82022	40.6983	150.641	1.43648	104.166	3.3673	41.8543	149.632	1.42722	100.076	3.55107	39.2222	142.831	1.43033	82.6568	3.17551	39.866	118.227						1.41302	177.187	8.93661	75.3697	250.369	1.41879	88.5071	3.23791	40.4721	125.573	1.45255	161.651	28.0649	69.958	234.806
1.40315	123.975	5.69059	45.6612	173.955	1.3944	138.162	3.44568	49.6709	192.653	1.41166	108.41	3.8466	40.8378	153.038	1.44624	105.263	3.38919	41.547	152.235	1.43655	97.5259	3.57383	39.1341	140.101	1.4267	81.4378	3.20077	39.9047	116.188						1.4012	181.256	8.96195	75.0302	253.975	1.37158	99.5395	3.25958	40.8154	136.526	1.43939	167.34	28.0855	70.2208	240.867
1.40146	124.88	5.71517	45.7841	175.015	1.40127	135.691	3.47834	49.7158	190.14	1.41043	109.371	3.9084	41.052	154.261	1.42779	106.118	3.41299	41.7201	151.515	1.42858	100.033	3.60048	39.3381	142.905	1.42442	81.809	3.22755	39.91	116.53						1.42253	172.988	8.9883	75.1735	246.081	1.38447	96.7991	3.28197	40.9421	134.016	1.45736	160.771	28.1059	70.354	234.301
1.40247	124.781	5.74005	45.8735	175.001	1.40197	135.814	3.50306	49.8647	190.408	1.41094	109.418	3.94131	41.1355	154.383	1.43432	104.489	3.43488	41.7591	149.871	1.42617	100.636	3.62264	39.338	143.523	1.39594	87.1512	3.24876	40.2001	121.658						1.39283	187.898	9.01392	75.6164	261.711	1.3918	95.366	3.30292	41.0306	132.73	1.45142	162.637	28.126	70.2032	236.056
1.3997	125.854	5.76421	45.919	176.158	1.39968	137.001	3.52519	49.9795	191.758	1.40896	110.362	3.97227	41.2739	155.496	1.43399	104.565	3.4585	41.7559	149.945	1.42327	101.71	3.64603	39.4634	144.761	1.41047	84.2292	3.27044	40.0156	118.803						1.39201	186.594	9.04969	75.5829	259.742	1.42915	87.4489	3.32366	40.8931	124.978	1.45441	161.897	28.1482	70.3713	235.465
1.3933	128.319	5.78935	45.9992	178.787	1.4074	133.964	3.55169	49.9124	188.541	1.42032	107.324	4.00251	41.356	152.434	1.4439	102.121	3.48141	41.7907	147.453	1.42047	102.561	3.66926	39.5042	145.685	1.4024	85.8627	3.2929	40.1346	120.414						1.41715	175.191	9.08037	75.2257	248.271	1.40801	91.7562	3.3441	40.9669	129.193	1.45856	160.694	28.1679	70.5073	234.381
1.40262	125.138	5.81525	46.0293	175.521	1.4057	134.95	3.57485	50.0456	189.7	1.40667	111.381	4.02718	41.4006	156.676	1.44829	103.595	3.50498	41.65	150.035	1.42428	101.718	3.69232	39.5701	144.875	1.40573	85.291	3.31527	40.1379	119.896						1.3998	184.934	9.10581	75.715	258.87	1.38853	96.3069	3.36662	41.1258	133.725	1.45697	161.732	28.1869	70.7085	235.639
1.41039	122.559	5.83909	46.0297	172.856	1.40752	134.34	3.59915	50.069	189.086	1.41941	107.697	4.05505	41.4045	152.866	1.42875	106.299	3.5279	41.8916	151.875	1.4157	104.267	3.71591	39.667	147.611	1.42781	81.5415	3.34285	40.0804	116.426						1.41972	84.1869	9.17924	36.3602	119.522	1.39798	94.3964	3.38798	41.1993	131.965	1.44046	168.545	28.207	70.907	242.783
1.40184	125.801	5.86313	46.1706	176.353	1.40481	135.629	3.62082	50.1716	190.533	1.41497	109.362	4.08145	41.5559	154.743	1.42577	107.277	3.55153	41.9576	152.952	1.4173	104.2	3.74078	39.8034	147.683	1.3981	86.4931	3.36551	40.2373	120.926						1.44115	80.2745	9.20627	36.3333	115.688	1.39466	95.26	3.40872	41.2599	132.855	1.452	164.193	28.2272	70.9704	238.409
1.39025	130.157	5.88745	46.2627	180.951	1.39815	138.526	3.64253	50.3165	193.68	1.40491	112.398	4.11113	41.5812	157.909	1.44049	103.154	3.57806	41.8619	148.592	1.42375	102.626	3.76591	39.8652	146.113	1.4075	85.0638	3.38724	40.3347	119.728						1.45016	79.4522	9.23175	36.2692	115.218	1.38688	97.5129	3.45063	41.4778	135.239	1.44387	167.49	28.2474	71.0331	241.834
1.39413	128.891	5.91187	46.3196	179.691	1.40555	135.84	3.66447	50.357	190.931	1.41146	110.813	4.13737	41.7193	156.409	1.43515	105.064	3.60404	42.0743	150.783	1.42179	103.502	3.79508	39.9962	147.158	1.43037	80.818	3.41018	40.0822	115.599						1.43571	81.4599	9.25807	36.44	116.952	1.40453	93.6442	3.47043	41.482	131.526	1.43993	169.282	28.2684	71.1313	243.755
1.40963	123.581	5.93684	46.3275	174.204	1.40031	137.816	3.68852	50.3718	192.985	1.41541	110.001	4.16351	41.8498	155.697	1.43801	104.363	3.62655	42.0947	150.075	1.40702	107.702	3.81758	40.0358	151.538	1.40407	85.5868	3.43254	40.3024	120.17						1.42097	84.5061	9.2851	36.5969	120.08	1.38553	97.8068	3.49091	41.4698	135.514	1.46321	160.474	28.2904	71.1648	234.807
1.3959	128.608	5.96073	46.4466	179.524	1.40657	135.648	3.71489	50.4288	190.798	1.40445	113.154	4.19261	41.8118	158.919	1.43994	103.87	3.6503	42.0965	149.566	1.42918	101.521	3.84049	39.9882	145.092	1.40314	85.8689	3.45577	40.519	120.486						1.43603	81.2221	9.31478	36.362	116.637	1.40268	94.2392	3.51232	41.5734	132.188	1.44945	166.15	28.3108	71.394	240.826
1.3998	127.321	5.98558	46.4794	178.223	1.39711	139.769	3.74081	50.6385	195.271	1.40789	112.558	4.21973	41.978	158.469	1.42787	107.056	3.67268	42.094	152.861	1.4268	102.321	3.8682	40.0533	145.991	1.40514	85.0468	3.4774	40.2948	119.502						1.45677	76.0548	9.34097	36.3109	110.794	1.40548	93.6108	3.53233	41.5563	131.568	1.46297	161.173	28.3315	71.4365	235.792
1.40159	126.641	6.01002	46.4622	177.499	1.41088	134.743	3.76586	50.6719	190.106	1.40639	113.212	4.24641	42.0513	159.221	1.44022	104.033	3.69783	42.1949	149.831	1.42747	102.251	3.89016	40.1012	145.96	1.40165	85.6439	3.49955	40.2925	120.043						1.46176	77.3005	9.39603	36.5299	112.995	1.41049	92.7531	3.55293	41.6412	130.827	1.46019	161.769	28.351	71.247	236.214
1.3991	127.926	6.03485	46.6112	178.982	1.40429	137.265	3.78709	50.7046	192.759	1.42324	108.438	4.27555	42.1038	154.334	1.42935	106.981	3.72042	42.2262	152.914	1.417	105.489	3.91094	40.2558	149.478	1.39179	87.7114	3.52085	40.4353	122.076						1.42801	83.2089	9.42227	36.6033	118.823	1.3909	97.7098	3.57408	41.9528	135.905	1.44807	167.079	28.3716	71.5645	241.942
1.40821	124.842	6.06013	46.626	175.804	1.40196	138.126	3.81058	50.7049	193.646	1.40595	113.655	4.3024	42.1671	159.792	1.42905	106.786	3.74562	42.118	152.602	1.4271	102.669	3.93482	40.2287	146.518	1.40457	85.2676	3.54336	40.3543	119.764						1.40864	87.4364	9.45018	36.8207	123.167	1.42009	91.0899	3.59857	41.7694	129.356	1.46069	162.3	28.3923	71.5618	237.07
1.39867	128.309	6.08421	46.6935	179.463	1.41918	132.405	3.83447	50.8929	187.907	1.40574	114.086	4.33359	42.3047	160.375	1.44239	103.609	3.77607	42.2439	149.444	1.41945	105.009	3.95716	40.3414	149.054	1.40888	84.9485	3.56509	40.5502	119.683						1.45796	77.9127	9.48763	36.5353	113.593	1.38971	97.8577	3.6213	41.9018	135.993	1.43942	171.256	28.4135	71.8709	246.509
1.39543	129.695	6.1155	46.7768	180.981	1.40582	137.434	3.85681	50.9832	193.207	1.40815	113.41	4.36272	42.3223	159.699	1.43663	105.579	3.79997	42.4403	151.678	1.43372	101.002	3.97968	40.2442	144.808	1.38675	88.8174	3.58732	40.5173	123.168						1.41701	85.5201	9.51201	36.706	121.183	1.41991	91.3411	3.6424	41.8694	129.696	1.45119	166.396	28.4339	71.7841	241.472
1.39943	128.626	6.14452	46.9066	180.003	1.39892	139.994	3.87912	50.963	195.841	1.40996	113.241	4.39408	42.4685	159.665	1.43054	107.029	3.823	42.3719	153.109	1.42009	105.146	4.00153	40.4623	149.317	1.4009	86.928	3.61064	40.5304	121.777						1.41939	85.3463	9.5359	36.8286	121.139	1.39059	98.0652	3.66304	42.0759	136.369	1.45554	165.065	28.4544	71.9351	240.259
1.40137	127.766	6.16893	46.8402	179.047	1.40851	136.866	3.90272	51.1343	192.777	1.41641	111.455	4.42067	42.5148	157.865	1.4409	104.47	3.84749	42.4382	150.531	1.43257	101.891	4.02462	40.4796	145.966	1.41427	84.7607	3.6324	40.6043	119.874						1.4529	79.2554	9.56252	36.7727	115.15	1.38483	99.3159	3.68329	42.0388	137.536	1.46061	163.497	28.4749	72.0807	238.806
1.3953	130.274	6.19401	46.9703	181.77	1.40349	139.155	3.94603	51.2886	195.303	1.41462	112.193	4.45139	42.5931	158.71	1.42949	107.634	3.87077	42.4982	153.862	1.41547	106.824	4.04589	40.6124	151.206	1.41107	85.2619	3.65429	40.5845	120.311						1.45727	79.1389	9.58794	36.9163	115.327	1.38847	98.9131	3.70524	42.2281	137.337	1.46836	160.567	28.4946	72.0288	235.769
1.40071	128.581	6.22227	47.0551	180.105	1.41077	136.307	3.96825	51.233	192.298	1.41924	111.115	4.47688	42.7006	157.7	1.41789	111.011	3.89557	42.5416	157.402	1.4211	105.457	4.06988	40.6857	149.865	1.40445	86.5955	3.67696	40.669	121.619						1.41454	86.4876	9.61446	37.0934	122.34	1.4261	90.6535	3.73031	42.1133	129.281	1.46042	163.835	28.5138	72.1916	239.268
1.40874	125.524	6.24682	46.9464	176.83	1.4049	138.685	3.99133	51.3261	194.839	1.41968	110.98	4.50451	42.6971	157.556	1.43033	107.553	3.91928	42.5549	153.837	1.41988	105.808	4.09389	40.6915	150.234	1.41513	84.8173	3.69897	40.703	120.028						1.44487	81.3034	9.64129	36.9521	117.473	1.3853	100.098	3.75057	42.4172	138.666	1.47483	158.674	28.5347	72.2058	234.016
1.39842	129.598	6.27123	47.1335	181.233	1.41057	136.975	4.01536	51.4643	193.213	1.41673	112.247	4.5323	42.8531	159.024	1.43198	107.422	3.94355	42.6781	153.827	1.43214	102.293	4.11742	40.595	146.499	1.41852	84.4165	3.72267	40.7828	119.746						1.45573	76.0142	9.66924	37.0657	110.656	1.41099	94.278	3.77224	42.3768	133.026	1.45608	165.938	28.5546	72.405	241.619
1.39818	129.891	6.29599	47.2075	181.612	1.40829	138.082	4.03705	51.5541	194.459	1.41256	113.604	4.56199	42.8936	160.473	1.44134	104.844	3.96657	42.6374	151.116	1.42632	104.361	4.14119	40.8086	148.852	1.41999	84.0556	3.7446	40.7282	119.358						1.46903	77.2826	9.69614	37.3267	113.53	1.41821	92.8819	3.79295	42.417	131.726	1.45315	167.657	28.5744	72.6623	243.632
1.40201	128.496	6.31987	47.194	180.152	1.42145	133.378	4.05962	51.5676	189.591	1.40862	115.239	4.59072	43.0647	162.328	1.42128	110.906	3.98931	42.8771	157.628	1.42977	103.4	4.16406	40.7905	147.838	1.39943	87.8394	3.76587	40.8307	122.925						1.42035	86.3109	9.7219	37.1407	122.592	1.4085	94.8904	3.81339	42.4139	133.653	1.46176	164.337	28.5949	72.6386	240.221
1.40171	128.912	6.34429	47.3076	180.697	1.41126	137.257	4.08204	51.6608	193.705	1.42131	111.696	4.61585	43.1569	158.754	1.44999	102.748	4.01274	42.6746	148.984	1.4449	99.7836	4.18591	40.8741	144.177	1.39547	88.8248	3.78804	40.9537	123.952						1.44243	81.8348	9.74961	37.4918	118.041	1.41757	92.8232	3.83376	42.3297	131.583	1.4514	168.419	28.6151	72.6983	244.443
1.39414	131.752	6.36954	47.3503	183.68	1.40963	138.137	4.10457	51.7707	194.722	1.41535	113.546	4.64252	43.1916	160.708	1.42673	109.171	4.03665	42.8036	155.758	1.44451	99.8176	4.21391	40.855	144.188	1.40244	87.601	3.80956	40.9735	122.855						1.41542	87.6529	9.779	37.3027	124.066	1.39992	97.3938	3.85419	42.6968	136.344	1.4511	168.896	28.6348	72.8518	245.085
1.39589	131.463	6.39356	47.4773	183.508	1.40578	140.07	4.1263	51.9475	196.907	1.42136	111.966	4.67015	43.2644	159.144	1.42935	108.61	4.06232	42.8678	155.242	1.41952	106.793	4.23636	41.0354	151.595	1.41556	84.9971	3.83106	40.822	120.318						1.44832	81.1706	9.80642	37.5133	117.561	1.41254	94.2029	3.87522	42.4881	133.066	1.45064	169.017	28.6547	72.83	245.184
1.39871	130.355	6.41768	47.4457	182.328	1.41056	138.127	4.14905	51.8978	194.836	1.40966	115.733	4.69803	43.3671	163.144	1.42873	108.85	4.08691	42.8975	155.517	1.43076	103.819	4.25904	41.0592	148.541	1.4065	86.8352	3.85537	40.9535	122.134						1.42744	85.3879	9.83377	37.5512	121.886	1.40068	97.2986	3.89651	42.7283	136.284	1.44803	170.41	28.6752	72.9864	246.759
1.40014	130.186	6.44482	47.5695	182.278	1.40519	140.661	4.17206	52.091	197.655	1.40917	116.016	4.72572	43.4161	163.487	1.43449	107.244	4.11028	42.8805	153.841	1.43068	104.024	4.28589	41.1246	148.825	1.39753	88.6831	3.87679	41.0628	123.937						1.42466	86.003	9.86253	37.5444	122.525	1.42509	92.2627	3.91755	42.7701	131.483	1.45301	168.75	28.6952	73.1096	245.194
1.39998	130.447	6.46895	47.6439	182.623	1.40647	140.088	4.19645	52.0655	197.03	1.40594	117.464	4.75555	43.5812	165.147	1.42259	110.827	4.13572	42.9953	157.661	1.42167	106.797	4.31017	41.2638	151.83	1.39567	89.2359	3.90415	41.1562	124.544						1.45937	79.8416	9.89082	37.4902	116.519	1.39841	98.006	3.93816	42.8153	137.053	1.46598	163.888	28.715	73.1281	240.257
1.40981	126.668	6.49348	47.5093	178.577	1.40811	139.924	4.22333	52.2324	197.029	1.41964	113.489	4.78432	43.6594	161.113	1.43559	107.577	4.15961	43.1331	154.436	1.4202	107.502	4.3318	41.3813	152.674	1.41004	86.4868	3.93821	41.0757	121.95						1.44781	81.6744	9.91926	37.645	118.249	1.38236	102.419	3.96988	43.0993	141.581	1.44711	171.669	28.7349	73.3633	248.424
1.40179	129.949	6.51784	47.6975	182.161	1.42241	134.395	4.25146	52.087	191.165	1.40775	117.42	4.80964	43.7752	165.298	1.43147	108.581	4.18489	43.0886	155.431	1.41928	108.055	4.35592	41.4929	153.36	1.40681	87.072	3.96371	41.087	122.494						1.44974	82.1119	9.97332	37.8447	119.041	1.39689	99.0036	3.99046	43.1024	138.297	1.44856	171.169	28.7544	73.3968	247.95
1.40029	130.434	6.54306	47.683	182.646	1.40135	143.036	4.27333	52.42	200.443	1.4132	115.922	4.83898	43.8482	163.822	1.4551	103.383	4.20968	43.0463	150.433	1.41672	108.593	4.37666	41.4176	153.846	1.40515	87.4576	3.98556	41.1325	122.891						1.42917	85.5415	9.99863	37.7204	122.253	1.37431	104.815	4.01219	43.2656	144.048	1.46141	166.283	28.7735	73.4351	243.007
1.40084	130.481	6.56933	47.7743	182.784	1.40707	140.961	4.29673	52.4721	198.342	1.40589	118.393	4.86789	43.9158	166.447	1.45093	106.298	4.2337	42.9251	154.231	1.4324	104.455	4.39885	41.4823	149.621	1.41639	85.6392	4.00757	41.201	121.299						1.41879	87.9804	10.0236	37.912	124.826	1.38952	100.851	4.03376	43.1662	140.135	1.45561	168.968	28.7937	73.6501	245.952
1.39914	131.279	6.59377	47.8396	183.678	1.39431	146.552	4.31981	52.6828	204.339	1.40382	119.301	4.89534	44.0045	167.478	1.42974	109.693	4.25915	43.3443	156.833	1.4162	108.987	4.43125	41.5061	154.347	1.4151	85.9118	4.02916	41.2252	121.574						1.46474	79.6514	10.0488	37.866	116.668	1.40935	96.6948	4.05393	43.3003	136.277	1.46104	167.598	28.9144	73.959	244.868
1.40463	129.321	6.61734	47.8335	181.648	1.40807	141.134	4.34477	52.6799	198.727	1.41059	117.348	4.92249	44.0841	165.53	1.44164	106.486	4.28221	43.3395	153.514	1.43501	104.086	4.454	41.6074	149.365	1.38062	92.7054	4.05099	41.4234	127.991						1.44718	82.9803	10.0739	38.0412	120.087	1.40212	98.1493	4.07444	43.2437	137.617	1.45372	171.356	28.9345	74.3634	249.103
1.39209	134.338	6.64155	48.0068	187.01	1.4043	142.907	4.3673	52.7984	200.684	1.40729	118.706	4.95086	44.1974	167.054	1.44312	106.195	4.30596	43.3791	153.253	1.42669	106.483	4.47772	41.6777	151.918	1.41742	85.8204	4.0725	41.3709	121.643						1.43239	85.9033	10.1002	38.1508	123.047	1.40239	98.0394	4.09793	43.2232	137.49	1.45518	170.717	28.9544	74.337	248.424
1.40169	130.786	6.66571	47.991	183.322	1.40816	141.498	4.38916	52.8234	199.251	1.41787	115.473	4.98004	44.2159	163.726	1.43036	109.818	4.32914	43.4586	157.078	1.42965	105.804	4.49946	41.7266	151.262	1.40043	88.9804	4.09515	41.4476	124.611						1.46536	79.5753	10.1289	37.8823	116.606	1.37096	106.599	4.12078	43.6462	146.143	1.46782	166.295	28.9743	74.5127	244.092
1.39951	131.641	6.68999	48.0186	184.232	1.41642	138.132	4.41063	52.7008	195.654	1.41904	115.514	5.00576	44.3703	163.919	1.41778	112.937	4.35364	43.5813	160.119	1.42216	108.461	4.52531	41.9577	154.249	1.40362	88.1725	4.11713	41.3417	123.761						1.46823	79.6377	10.1534	38.1298	116.927	1.41833	94.8502	4.14162	43.3284	134.529	1.46249	168.09	28.9939	74.4195	245.829
1.40418	130.19	6.71343	48.0951	182.811	1.40978	141.189	4.43235	52.9348	199.045	1.41132	118.302	5.03199	44.5252	166.962	1.44255	107.106	4.37879	43.6918	154.506	1.42936	106.175	4.54702	41.8419	151.762	1.42344	84.8281	4.14138	41.3834	120.748						1.42484	87.5063	10.1892	38.2254	124.682	1.39538	100.589	4.1624	43.6426	140.361	1.44461	175.863	29.0138	74.7187	254.054
1.39666	133.178	6.73769	48.1996	186.005	1.40714	142.572	4.45572	53.084	200.619	1.41356	117.468	5.05849	44.4739	166.049	1.45989	101.797	4.40262	43.286	148.613	1.4238	107.766	4.56854	41.8712	153.438	1.4378	82.4387	4.1638	41.3508	118.53						1.43176	86.55	10.2165	38.3835	123.919	1.41097	96.8264	4.18319	43.5185	136.619	1.47056	165.542	29.0334	74.6262	243.44
1.40075	131.452	6.76119	48.1133	184.131	1.4069	142.865	4.48022	53.1551	200.998	1.40878	119.517	5.08661	44.6774	168.373	1.44482	106.748	4.45013	43.784	154.231	1.41387	111.088	4.59499	42.0519	157.064	1.42185	85.4403	4.18615	41.5522	121.483						1.4438	84.2531	10.2531	38.3533	121.645	1.39337	101.182	4.204	43.6967	140.984	1.46032	169.867	29.0526	74.8362	248.06
1.41013	128.204	6.7854	48.1262	180.784	1.40143	145.092	4.50357	53.1893	203.337	1.41417	117.807	5.11647	44.6729	166.6	1.43806	108.766	4.47344	43.8784	156.413	1.40298	114.768	4.61649	42.2007	161.016	1.41777	86.2726	4.20803	41.6192	122.315						1.44992	83.4267	10.2988	38.4689	120.962	1.43083	92.8981	4.22446	43.5981	132.921	1.46511	167.88	29.0718	74.7628	245.962
1.39759	133.057	6.81063	48.281	185.96	1.40894	142.634	4.52999	53.3627	200.962	1.41636	117.096	5.1415	44.6621	165.85	1.44301	107.169	4.49698	43.7621	154.645	1.42242	109.028	4.63921	42.2107	155.084	1.40752	88.0955	4.23105	41.6334	123.997						1.41896	89.5625	10.3258	38.6118	127.086	1.39553	100.884	4.24558	43.785	140.787	1.46726	167.142	29.0913	74.7981	245.241
1.39207	135.308	6.83623	48.3475	188.358	1.40184	145.669	4.552	53.4601	204.205	1.41576	117.6	5.17115	44.7798	166.493	1.43815	108.896	4.52136	43.9405	156.609	1.42096	109.595	4.6599	42.2637	155.73	1.41708	86.5681	4.25247	41.7043	122.674						1.43975	85.8206	10.3536	38.7244	123.56	1.37874	105.568	4.26636	44.0467	145.55	1.4658	168.171	29.1105	75.0116	246.505
1.39724	133.446	6.86143	48.3792	186.457	1.41017	142.771	4.57462	53.5895	201.332	1.4069	120.914	5.20102	44.9708	170.115	1.44589	106.73	4.54662	43.891	154.319	1.41511	111.181	4.6813	42.231	157.334	1.3961	90.5522	4.27467	41.8055	126.42						1.42451	88.944	10.3806	38.8222	126.701	1.40534	99.0414	4.30931	43.958	139.187	1.44236	178.311	29.1307	75.3583	257.188
1.39766	133.585	6.8871	48.4854	186.707	1.40443	145.334	4.59731	53.7143	204.111	1.40558	121.502	5.22663	45.0303	170.782	1.42592	112.468	4.57057	44.0056	160.37	1.41673	111.103	4.70265	42.369	157.404	1.40525	88.8784	4.29971	41.8114	124.897						1.42856	87.6971	10.4066	38.6213	125.281	1.39107	102.323	4.33014	43.9517	142.339	1.46769	167.855	29.1518	75.1942	246.359
1.40334	131.956	6.93853	48.6393	185.178	1.42492	137.586	4.61883	53.6622	196.049	1.4131	119.345	5.25121	45.1293	168.646	1.43324	110.77	4.5941	44.1503	158.76	1.41872	110.388	4.72484	42.3279	156.609	1.42712	85.1138	4.32287	41.8217	121.467						1.42214	89.5236	10.4353	38.87	127.315	1.39057	102.836	4.35189	44.1222	143.001	1.45022	175.408	29.1714	75.507	254.38
1.39928	133.43	6.962	48.642	186.705	1.40313	146.305	4.64117	53.8793	205.285	1.41558	118.624	5.27953	45.1497	167.922	1.45604	104.014	4.62008	43.8285	151.448	1.43671	105.264	4.75029	42.2514	151.233	1.40773	88.4497	4.34602	41.8185	124.513						1.43676	86.3441	10.4626	38.7158	124.056	1.39582	101.596	4.37265	44.1233	141.809	1.45582	172.934	29.1918	75.4177	251.762
1.39767	134.142	6.98645	48.6854	187.486	1.42173	139.254	4.66419	53.878	197.981	1.41272	119.622	5.30728	45.1876	168.993	1.46008	103.202	4.64472	43.9065	150.682	1.42747	108.461	4.77604	42.5329	154.825	1.40341	89.4966	4.3695	41.9437	125.601						1.46598	81.374	10.4952	38.7911	119.293	1.37624	106.621	4.39327	44.2177	146.736	1.47469	165.819	29.213	75.4419	244.533
1.39338	136.157	7.0113	48.834	189.719	1.40473	146.161	4.68645	54.0615	205.316	1.4146	119.545	5.33751	45.3851	169.108	1.44747	107.17	4.66849	44.2415	155.125	1.42356	109.642	4.79816	42.5732	156.083	1.42986	84.7431	4.40535	41.8572	121.171						1.44272	85.5359	10.5328	38.847	123.404	1.41083	98.4921	4.41409	44.2531	138.956	1.446	177.27	29.2335	75.5652	256.332
1.40481	131.778	7.03645	48.7699	185.123	1.40281	146.986	4.70926	54.0879	206.193	1.41175	120.34	5.36627	45.341	169.889	1.4419	108.735	4.69181	44.2832	156.785	1.4388	105.475	4.82266	42.5595	151.757	1.38444	93.4945	4.42719	42.1203	129.437						1.4317	88.1828	10.5599	39.1023	126.251	1.39285	102.793	4.43605	44.3406	143.175	1.45929	172.394	29.2541	75.7724	251.573
1.39469	135.567	7.06147	48.7999	189.074	1.40593	145.933	4.73315	54.1584	205.171	1.41331	120.27	5.39704	45.5047	169.979	1.43195	111.774	4.71463	44.4057	160.054	1.42975	107.99	4.84519	42.5999	154.399	1.40628	89.2755	4.44929	42.0866	125.546						1.44528	85.9339	10.6144	39.2397	124.199	1.40115	100.86	4.45643	44.3406	141.32	1.45254	175.478	29.2741	75.9448	254.889
1.38695	139.049	7.08684	48.9795	192.854	1.41594	141.932	4.75712	54.0997	200.967	1.4117	121.142	5.42682	45.6416	171.016	1.4326	111.754	4.73902	44.4741	160.098	1.42566	109.546	4.8705	42.7617	156.175	1.39709	90.9222	4.47166	42.0629	127.026						1.42864	89.01	10.642	39.21	127.163	1.39865	101.726	4.47669	44.4667	142.279	1.46404	170.678	29.2942	75.832	249.879
1.405	132.281	7.11194	48.9841	185.854	1.40629	146.26	4.77972	54.3349	205.684	1.41396	120.439	5.45183	45.6478	170.296	1.43273	112.029	4.76296	44.5967	160.507	1.4223	110.638	4.89141	42.8182	157.361	1.41903	87.0163	4.49372	42.0841	123.479						1.43875	87.1253	10.6685	39.2284	125.352	1.4233	96.3442	4.49804	44.4905	137.126	1.45439	174.972	29.3141	76.0496	254.477
1.40302	133.082	7.1356	49.0108	186.716	1.40813	145.507	4.80259	54.3179	204.892	1.40597	123.363	5.48087	45.7659	173.445	1.43977	109.94	4.78941	44.5395	158.288	1.41796	112.177	4.91211	42.9223	159.064	1.41329	88.2901	4.51508	42.2133	124.78						1.43029	89.1603	10.6961	39.4165	127.525	1.40392	100.601	4.51875	44.5046	141.235	1.45086	176.829	29.335	76.2406	256.553
1.39688	135.441	7.16038	49.0514	189.196	1.40997	145.273	4.82445	54.4937	204.831	1.41268	121.318	5.50911	45.8217	171.382	1.44178	109.517	4.81296	44.5883	157.9	1.42897	108.964	4.93404	42.8997	155.706	1.40334	90.4377	4.53687	42.3806	126.915						1.4242	90.6397	10.7244	39.5374	129.089	1.40874	99.6999	4.53964	44.5889	140.451	1.46286	172	29.3549	76.2152	251.612
1.40146	134.022	7.18607	49.1524	187.826	1.40454	147.834	4.84859	54.6568	207.638	1.41379	121.134	5.53922	45.8879	171.258	1.44405	108.903	4.83933	44.5854	157.261	1.43018	108.827	4.95701	42.9773	155.643	1.40933	89.2547	4.55829	42.3374	125.789						1.44618	86.2202	10.7507	39.4451	124.69	1.40458	100.657	4.56088	44.5985	141.381	1.46814	170.197	29.3749	76.317	249.874
1.40171	134.112	7.20931	49.2159	187.986	1.41553	143.19	4.8709	54.5143	202.689	1.41446	121.139	5.56454	45.9745	171.347	1.45189	106.853	4.86548	44.5869	155.139	1.42601	110.07	4.97822	43.0096	156.961	1.39522	91.9822	4.58018	42.3893	128.335						1.43962	87.6398	10.7772	39.5906	126.168	1.39962	102.099	4.58306	44.7298	142.9	1.46619	171.187	29.3952	76.4264	250.993
1.40561	132.838	7.23332	49.2643	186.719	1.40404	148.383	4.89396	54.7881	208.337	1.41634	120.794	5.59165	46.07	171.085	1.43409	111.991	4.8883	44.7343	160.605	1.42095	111.635	5.00183	43.0566	158.628	1.38864	93.5716	4.60492	42.5292	129.938						1.44151	87.513	10.8037	39.522	126.151	1.3868	105.365	4.60367	44.8096	146.121	1.46042	173.514	29.4153	76.469	253.404
1.40079	134.861	7.25686	49.3682	188.912	1.41709	143.456	4.91708	54.8419	203.289	1.41787	120.748	5.61897	46.2385	171.204	1.44667	108.337	4.91195	44.6376	156.728	1.41893	112.601	5.02195	43.1871	159.773	1.40319	90.6337	4.62681	42.4586	127.176						1.44248	87.2168	10.8319	39.8183	125.809	1.41196	99.4478	4.62497	44.7959	140.416	1.4529	176.944	29.4356	76.6497	257.082
1.3984	135.839	7.28127	49.4015	189.957	1.3997	150.59	4.93942	54.9419	210.781	1.41424	122.04	5.64715	46.2851	172.594	1.44063	110.328	4.93757	44.7912	158.943	1.44331	105.342	5.04423	42.9856	152.041	1.40715	89.7956	4.65172	42.4047	126.356						1.47417	81.5574	10.8592	39.9234	120.229	1.41868	98.1112	4.64649	44.8539	139.188	1.44877	178.77	29.4557	76.6995	258.998
1.4013	134.992	7.30605	49.4824	189.165	1.41665	144.187	4.96299	55.0568	204.262	1.41413	122.391	5.67337	46.4106	173.078	1.44562	109.467	4.96048	44.9882	158.247	1.43949	106.725	5.06584	43.1421	153.629	1.40115	91.4039	4.67364	42.6407	128.07						1.41473	93.2526	10.8842	39.828	131.927	1.3958	103.435	4.66742	44.9206	144.374	1.48394	165.251	29.4757	76.7093	245.222
1.40486	133.662	7.33135	49.4738	187.777	1.41359	145.292	4.98719	55.0333	205.384	1.4121	123.286	5.70126	46.4987	174.093	1.45214	107.405	4.9837	44.8384	155.966	1.43423	108.402	5.08715	43.2483	155.473	1.40918	89.8923	4.69483	42.6259	126.674						1.42246	91.8914	10.9093	40.1824	130.712	1.41829	98.4281	4.68919	44.9629	139.6	1.45888	175.219	29.4957	76.9453	255.623
1.40534	133.758	7.35555	49.569	187.975	1.41708	144.233	5.00988	55.1315	204.39	1.41412	122.688	5.72793	46.525	173.497	1.4369	111.793	5.00745	44.9695	160.636	1.42502	111.345	5.1081	43.3955	158.669	1.41758	88.2839	4.71606	42.573	125.149						1.44482	87.309	10.9364	40.1549	126.146	1.37522	109.394	4.71002	45.2578	150.442	1.46432	173.087	29.516	76.9466	253.454
1.39142	139.276	7.37915	49.6763	193.793	1.41796	144.169	5.03158	55.2349	204.425	1.40809	125.118	5.75424	46.6856	176.177	1.45925	108.164	5.0345	44.7329	157.839	1.43481	108.794	5.12942	43.4682	156.098	1.39682	92.2396	4.73721	42.6471	128.842						1.42398	92.1662	10.965	40.0743	131.243	1.41782	98.8892	4.73106	45.1251	140.207	1.47001	171.061	29.5375	77.0286	251.462
1.40033	135.951	7.40277	49.7022	190.376	1.41831	144.404	5.05521	55.3786	204.809	1.4054	126.559	5.78323	46.8847	177.867	1.43645	112.555	5.05779	45.2254	161.68	1.42886	110.721	5.15085	43.5801	158.205	1.40704	90.4567	4.75875	42.7076	127.276						1.42068	92.7878	10.99	40.2159	131.821	1.38063	108.402	4.77198	45.4329	149.663	1.4704	171.155	29.5577	77.1287	251.666
1.40286	134.991	7.42608	49.6924	189.373	1.40469	150.109	5.07706	55.5161	210.855	1.41968	121.681	5.8089	46.8154	172.748	1.44055	111.077	5.08074	45.0879	160.013	1.4421	106.641	5.17518	43.3892	153.786	1.41002	89.9853	4.78431	42.7403	126.881						1.44909	87.06	11.0167	40.1444	126.157	1.393	105.213	4.79307	45.3994	146.562	1.45378	177.989	29.5782	77.2531	258.756
1.40546	134.321	7.45235	49.7951	188.783	1.40271	151.189	5.09892	55.6242	212.075	1.41599	123.04	5.83977	46.8796	174.224	1.43541	112.603	5.10482	45.1269	161.632	1.42938	110.461	5.19753	43.535	157.89	1.42727	86.7995	4.80629	42.6644	123.886						1.44185	88.7182	11.0443	40.2635	127.918	1.37166	111.233	4.81397	45.6198	152.574	1.45524	178.129	29.599	77.5771	259.221
1.40379	135.304	7.48123	49.9318	189.939	1.41402	146.458	5.12192	55.5381	207.095	1.41185	124.913	5.86827	47.0774	176.358	1.42869	114.976	5.12781	45.3032	164.266	1.42614	111.75	5.21913	43.6815	159.371	1.40391	91.1786	4.82862	42.7769	128.006						1.4519	86.7018	11.0711	40.3672	125.882	1.37536	110.277	4.83418	45.6368	151.67	1.44928	180.502	29.6197	77.5303	261.597
1.40266	135.845	7.50483	49.9816	190.545	1.4067	150.033	5.14596	55.7993	211.051	1.40862	126.254	5.89874	47.1729	177.844	1.43314	114.051	5.15245	45.4506	163.452	1.42864	111.139	5.24117	43.7208	158.777	1.40377	91.46	4.85001	42.8966	128.389						1.41655	93.895	11.099	40.5465	133.007	1.37494	110.385	4.85455	45.6353	151.773	1.46352	174.671	29.6405	77.5128	255.634
1.39987	137.015	7.52856	50.0289	191.804	1.4068	150.308	5.168	55.9091	211.453	1.40445	127.888	5.9232	47.2537	179.612	1.42759	115.321	5.17724	45.3148	164.631	1.44018	108.116	5.26228	43.7781	155.707	1.40924	90.423	4.87192	42.8841	127.428						1.465	84.8466	11.1818	40.4906	124.301	1.39195	106.079	4.8752	45.6596	147.656	1.45363	179.086	29.6612	77.7041	260.324
1.39999	137.134	7.55232	50.0889	191.985	1.40927	149.585	5.18984	56.0101	210.806	1.41511	124.285	5.94822	47.2482	175.877	1.44428	110.676	5.20339	45.3391	159.848	1.42863	111.407	5.2836	43.8237	159.159	1.39455	93.6688	4.89894	43.1042	130.626						1.42278	93.2517	11.2078	40.596	132.677	1.39912	104.17	4.89551	45.5857	145.746	1.46333	175.183	29.6817	77.7064	256.35
1.39582	139.064	7.5801	50.2099	194.107	1.40575	150.979	5.2116	55.9998	212.239	1.41437	124.812	5.97603	47.3578	176.53	1.44301	111.079	5.22827	45.3632	160.288	1.44169	108.007	5.30524	43.8908	155.713	1.41524	89.5392	4.9241	42.9769	126.719						1.4595	86.0807	11.2363	40.7437	125.634	1.36736	112.658	4.9159	45.7214	154.044	1.44784	182.177	29.7016	77.987	263.763
1.40536	135.676	7.60428	50.2866	190.672	1.40958	149.53	5.23519	56.0445	210.774	1.40731	127.64	6.00097	47.5274	179.628	1.44669	110.422	5.25188	45.4973	159.746	1.42751	111.976	5.32759	43.9236	159.846	1.40371	91.9588	4.94615	43.1272	129.083						1.45315	87.4473	11.2837	40.7888	127.074	1.3794	109.861	4.93702	45.9092	151.543	1.44765	182.424	29.722	78.0613	264.087
1.39925	137.94	7.62799	50.2807	193.012	1.40279	152.862	5.25783	56.2436	214.433	1.41485	125.113	6.02621	47.533	177.017	1.44885	109.978	5.27523	45.5526	159.342	1.42073	114.675	5.35252	44.2025	162.923	1.39186	94.4371	4.96794	43.2168	131.443						1.45658	87.1377	11.3136	41.0195	126.923	1.39063	106.952	4.98269	45.8949	148.731	1.45733	178.551	29.7423	78.1279	260.207
1.39946	138.077	7.65155	50.359	193.233	1.41598	147.389	5.28053	56.18	208.7	1.41013	127.111	6.05213	47.6931	179.243	1.43067	115.335	5.29878	45.6781	165.006	1.43594	110.017	5.37484	44.0824	157.978	1.40402	92.146	4.99184	43.2392	129.375						1.44567	89.2598	11.3398	41.1473	129.04	1.38124	109.188	5.00313	45.8298	150.816	1.45604	179.145	29.7623	78.1594	260.842
1.39808	138.825	7.67523	50.4408	194.088	1.4203	146.073	5.30326	56.3078	207.468	1.429	121.026	6.08169	47.6878	172.945	1.43318	114.925	5.32648	45.8003	164.708	1.432	111.405	5.39582	44.198	159.532	1.40285	92.3341	5.01397	43.2258	129.53						1.44241	90.1999	11.3656	41.1091	130.106	1.39427	106.108	5.02457	45.9194	147.944	1.47093	173.431	29.7827	78.2482	255.106
1.40232	137.457	7.69984	50.5276	192.759	1.40919	150.766	5.32564	56.4398	212.459	1.40788	128.206	6.10561	47.8134	180.498	1.43954	112.715	5.35076	45.6384	162.258	1.43478	110.612	5.41752	44.1931	158.704	1.40993	91.0782	5.03646	43.2547	128.414						1.47164	84.9057	11.3933	41.3563	124.951	1.40088	104.712	5.0471	46.0105	146.689	1.45157	181.622	29.8028	78.4268	263.637
1.39675	139.794	7.72423	50.6091	195.257	1.40115	154.212	5.34784	56.4882	216.074	1.41062	127.735	6.135	47.9888	180.185	1.4562	108.453	5.37364	45.717	157.93	1.42679	113.204	5.43862	44.3224	161.519	1.40991	91.2441	5.06016	43.3314	128.646						1.44718	89.474	11.4196	41.3155	129.485	1.36724	113.496	5.06785	46.0492	155.176	1.45497	180.553	29.823	78.5817	262.699
1.39674	139.942	7.74801	50.6611	195.463	1.40269	153.958	5.37209	56.6404	215.956	1.40822	128.871	6.16054	48.1051	181.479	1.42093	118.882	5.39726	45.9229	168.922	1.42497	113.66	5.46401	44.3023	161.962	1.39942	93.4309	5.08314	43.4306	130.749						1.45084	89.0674	11.4457	41.3138	129.223	1.39579	106.298	5.08871	46.1639	148.371	1.46504	176.337	29.843	78.5248	258.341
1.40274	137.831	7.77174	50.7212	193.341	1.40782	151.955	5.39455	56.6838	213.926	1.41318	127.212	6.18704	48.1177	179.773	1.43997	112.818	5.4213	45.73	162.455	1.41242	118.501	5.48449	44.6846	167.373	1.39738	93.8115	5.10549	43.4259	131.09						1.44937	89.2631	11.4717	41.3267	129.375	1.35975	116.247	5.1092	46.294	158.066	1.46324	177.442	29.8634	78.6953	259.64
1.40256	138.087	7.79486	50.7894	193.674	1.41135	150.475	5.41693	56.6611	212.372	1.41902	125.434	6.21295	48.1786	177.993	1.42672	117.539	5.44595	46.089	167.696	1.43556	111.287	5.50487	44.5386	159.759	1.3985	93.9032	5.12942	43.5677	131.323						1.45547	88.5683	11.5502	41.4308	128.908	1.38478	109.37	5.13089	46.2932	151.453	1.44894	183.885	29.8837	78.9235	266.437
1.40364	137.822	7.81849	50.8459	193.453	1.40711	152.609	5.44094	56.8192	214.738	1.4041	131.073	6.23777	48.385	184.04	1.42882	116.843	5.47247	46.057	166.947	1.42931	113.083	5.52738	44.5602	161.631	1.39615	94.3522	5.15103	43.5649	131.729						1.45538	88.6086	11.5792	41.4238	128.959	1.39304	106.96	5.15404	46.1561	149	1.44165	187.527	29.9046	79.1176	270.35
1.40072	139.249	7.84197	50.9646	195.049	1.40807	152.581	5.46323	56.9495	214.845	1.42021	125.431	6.26446	48.3295	178.139	1.43456	115.41	5.49742	46.1535	165.563	1.42749	113.966	5.55051	44.703	162.685	1.40089	93.6168	5.17773	43.6484	131.147						1.42066	95.7341	11.6073	41.5496	136.005	1.40303	105.056	5.17446	46.3857	147.397	1.45921	180.003	29.9255	79.1105	262.662
1.40213	138.81	7.86674	50.9976	194.63	1.41583	149.67	5.48575	57.0289	211.906	1.41088	128.998	6.28973	48.4927	182	1.42747	117.617	5.52557	46.2045	167.895	1.43619	111.266	5.57313	44.6099	159.798	1.40264	93.1709	5.20206	43.5966	130.685						1.49316	82.3609	11.6342	41.6665	122.978	1.36747	114.44	5.19499	46.4577	156.493	1.46371	177.84	29.9451	78.9541	260.306
1.40106	139.659	7.89123	51.163	195.672	1.42417	146.13	5.50794	56.8986	208.115	1.41061	129.259	6.31691	48.564	182.333	1.46057	109.583	5.55072	46.037	160.054	1.43151	112.913	5.59584	44.7415	161.637	1.41563	91.0829	5.22331	43.7536	128.94						1.45451	89.2517	11.6591	41.6695	129.817	1.3918	108.238	5.21622	46.5741	150.645	1.46795	176.6	29.9653	79.155	259.24
1.40352	138.726	7.91459	51.1608	194.705	1.4022	155.687	5.53317	57.1948	218.304	1.4111	129.574	6.34251	48.7452	182.842	1.43143	116.735	5.5745	46.321	167.098	1.42548	114.916	5.61727	44.8422	163.81	1.43269	87.8699	5.2488	43.6438	125.89						1.43942	92.4057	11.6881	41.7932	133.01	1.38314	110.516	5.2373	46.5971	152.859	1.45641	181.64	29.9858	79.318	264.542
1.40321	139.079	7.93826	51.2488	195.158	1.41153	152.118	5.55566	57.3025	214.718	1.41079	129.811	6.36801	48.7931	183.136	1.43401	115.947	5.59869	46.3046	166.269	1.41983	116.969	5.63842	44.9821	166.075	1.39708	94.9846	5.27114	43.9433	132.701						1.43743	93.4074	11.7693	41.9392	134.266	1.39297	107.973	5.25775	46.5865	150.403	1.46205	179.084	30.0064	79.2121	261.829
1.39838	141.19	7.96468	51.3402	197.437	1.39975	157.27	5.57819	57.3943	220.139	1.41688	127.984	6.39511	48.8828	181.339	1.42723	118.247	5.62308	46.422	168.765	1.42006	117.156	5.65878	45.0704	166.37	1.42273	90.0274	5.29358	43.859	128.085						1.43339	94.5334	11.7963	42.0708	135.503	1.40307	105.271	5.27858	46.4837	147.702	1.46334	179.031	30.0262	79.4149	261.984
1.39704	142.013	7.98924	51.4562	198.398	1.41107	152.572	5.60123	57.4095	215.29	1.41447	129.157	6.42069	49.0203	182.69	1.42987	117.884	5.64721	46.5924	168.559	1.43025	113.884	5.67982	44.9832	162.883	1.41779	91.0209	5.31839	43.9119	129.049						1.467	87.862	11.828	41.9691	128.894	1.37994	111.445	5.29916	46.6301	153.787	1.47225	175.716	30.0463	79.514	258.698
1.39995	140.986	8.01235	51.4899	197.373	1.426	146.822	5.62349	57.4359	209.368	1.42112	127.146	6.44886	49.1018	180.691	1.43255	116.814	5.67081	46.4788	167.341	1.43852	111.527	5.70281	44.9734	160.434	1.40431	93.7288	5.34192	44.0088	131.624						1.47575	86.4898	11.8544	42.0435	127.637	1.38416	110.21	5.31946	46.5794	152.549	1.45994	181.083	30.0666	79.7175	264.371
1.40129	140.631	8.03754	51.549	197.065	1.41119	153.141	5.64548	57.64	216.111	1.41697	128.525	6.47406	49.1022	182.116	1.4424	113.955	5.69581	46.4661	164.369	1.43316	113.158	5.72614	45.0292	162.173	1.42466	89.9175	5.3643	43.9721	128.102						1.46785	88.1746	11.8814	42.1898	129.427	1.4065	105.324	5.33978	46.8675	148.138	1.46428	179.576	30.0874	79.8336	262.95
1.39746	142.473	8.0647	51.6864	199.099	1.39792	159.172	5.66798	57.7926	222.511	1.41323	130.325	6.49957	49.3013	184.178	1.42459	119.8	5.71861	46.7132	170.666	1.42861	114.905	5.74838	45.1988	164.154	1.41431	92.0797	5.3895	44.1149	130.229						1.43033	95.8163	11.9066	42.359	137.049	1.39829	107.267	5.36018	46.8523	149.99	1.47132	176.545	30.1071	79.7232	259.754
1.40418	140.156	8.09355	51.7872	196.804	1.41387	152.322	5.69392	57.7426	215.363	1.41501	129.814	6.52703	49.3368	183.688	1.4402	114.42	5.74444	46.4031	164.787	1.43549	113.041	5.77068	45.2429	162.269	1.40483	94.1697	5.41107	44.2636	132.292						1.4465	92.4618	11.9329	42.3281	133.746	1.37023	114.969	5.38049	46.9907	157.534	1.46599	178.983	30.1274	79.8703	262.387
1.4004	141.675	8.11777	51.8052	198.402	1.40894	154.53	5.71619	57.8172	217.724	1.40885	132.455	6.55425	49.5263	186.61	1.4414	114.899	5.7692	46.7377	165.615	1.41355	120.115	5.79212	45.439	169.789	1.39128	97.0266	5.43231	44.3477	134.991						1.45423	91.0013	11.9616	42.3393	132.337	1.38205	111.517	5.40075	46.8969	154.122	1.45442	184.394	30.1474	80.1499	268.186
1.39393	144.402	8.14091	51.8673	201.285	1.40669	156.079	5.73866	58.0462	219.554	1.41245	131.454	6.58224	49.6244	185.672	1.4424	114.476	5.79288	46.6821	165.121	1.42961	115.222	5.81375	45.4395	164.723	1.39063	97.224	5.45496	44.3769	135.203						1.44963	91.8374	11.9879	42.3189	133.13	1.39532	108.339	5.42138	46.9977	151.167	1.47554	175.427	30.167	79.96	258.85
1.3998	142.339	8.16539	51.9649	199.247	1.40744	156.019	5.76245	58.1323	219.587	1.41541	130.229	6.6061	49.5491	184.327	1.43322	117.912	5.81672	46.9988	168.994	1.43023	114.832	5.83607	45.3553	164.236	1.40258	94.8029	5.48045	44.3541	132.968						1.41615	99.1243	12.0171	42.4618	140.375	1.4029	106.291	5.44176	46.9158	149.115	1.4502	186.603	30.1875	80.3261	270.613
1.40116	142.035	8.19013	52.0478	199.013	1.40567	156.807	5.78466	58.1551	220.419	1.4214	128.649	6.63225	49.7177	182.861	1.42499	120.428	5.84018	47.0091	171.609	1.42093	118.022	5.8576	45.5175	167.701	1.41759	91.7675	5.50546	44.2537	130.088						1.46004	90.2867	12.0463	42.5149	131.822	1.40714	105.169	5.4627	46.8681	147.987	1.47476	176.675	30.2085	80.3983	260.553
1.40369	141.324	8.21536	52.1511	198.375	1.40643	156.688	5.8071	58.2276	220.372	1.41491	131.27	6.65787	49.8822	185.735	1.45216	112.187	5.8641	46.8386	162.914	1.41986	118.802	5.8804	45.6921	168.682	1.40585	94.4529	5.52719	44.4887	132.786						1.449	92.6045	12.0742	42.6158	134.184	1.39584	108.497	5.48346	47.1241	151.444	1.46966	178.67	30.2282	80.3868	262.584
1.40393	141.213	8.23893	52.1377	198.253	1.40777	156.487	5.82985	58.3648	220.297	1.41872	130.079	6.68425	49.9234	184.546	1.4304	118.914	5.88675	47.0604	170.095	1.42679	116.456	5.90302	45.5956	166.158	1.41253	93.1394	5.5486	44.4669	131.562						1.48563	85.9588	12.1005	42.6026	127.703	1.37684	113.939	5.50408	47.3231	156.876	1.46216	182.288	30.2483	80.6488	266.533
1.40209	142.364	8.26262	52.3018	199.608	1.43254	148.43	5.85102	58.2761	212.631	1.41494	131.764	6.71054	50.0711	186.438	1.4446	114.587	5.91298	46.9764	165.533	1.42899	115.975	5.92431	45.6628	165.727	1.39309	97.29	5.57112	44.6374	135.533						1.44517	93.8068	12.1324	42.821	135.566	1.3904	110.125	5.52447	47.2315	153.118	1.46229	182.266	30.269	80.6685	266.526
1.40069	143.083	8.28658	52.3653	200.414	1.41245	154.929	5.87471	58.5143	218.829	1.42297	129.255	6.73658	50.1564	183.927	1.44045	116.402	5.93563	47.236	167.672	1.41686	120.178	5.94536	45.8569	170.276	1.39193	97.4974	5.59356	44.6244	135.709						1.46099	90.5674	12.1612	42.7292	132.318	1.38136	112.889	5.54533	47.3955	155.94	1.45306	186.372	30.2892	80.7629	270.811
1.40342	142.39	8.31067	52.5001	199.832	1.40787	157.147	5.89713	58.6265	221.243	1.41156	133.588	6.76296	50.3109	188.567	1.45793	111.259	5.9586	47.0934	162.208	1.42699	116.969	5.96687	45.8214	166.915	1.4194	92.1195	5.61556	44.5867	130.755						1.45522	91.6988	12.189	42.7512	133.442	1.37186	115.766	5.5663	47.5072	158.815	1.44794	189.23	30.3093	81.0288	273.994
1.40231	143.018	8.33521	52.5681	200.555	1.40304	159.501	5.92042	58.7364	223.786	1.4161	131.828	6.78758	50.2488	186.682	1.44191	115.844	5.98146	47.1809	167.037	1.42749	117.025	5.98964	45.9003	167.052	1.40108	95.8911	5.6375	44.7303	134.351						1.45775	91.4746	12.2158	42.8676	133.348	1.38568	112.032	5.58722	47.5196	155.24	1.47445	178.111	30.3303	80.9933	262.616
1.39889	144.672	8.36016	52.6837	202.38	1.40942	157.181	5.94309	58.8836	221.535	1.42034	131.177	6.81278	50.5577	186.317	1.44089	115.886	6.00479	47.0765	166.979	1.42927	116.713	6.01208	45.9865	166.814	1.44241	88.0249	5.6597	44.5436	126.968						1.44373	94.666	12.2464	43.0834	136.673	1.37168	116.082	5.6088	47.6164	159.226	1.46734	181.174	30.3502	81.0944	265.844
1.40401	142.436	8.38512	52.6001	199.982	1.41269	155.949	5.96687	58.9318	220.308	1.41916	131.533	6.83856	50.5414	186.667	1.42607	121.18	6.02734	47.4329	172.812	1.41946	119.838	6.03354	46.0426	170.105	1.39539	97.4628	5.68202	44.9331	135.998						1.47568	88.6323	12.2741	43.0801	130.793	1.38255	113.08	5.6322	47.6143	156.339	1.47562	178.192	30.3695	81.2336	262.944
1.39831	145.422	8.40982	52.8737	203.345	1.40806	157.9	5.98902	58.9393	222.333	1.40969	135.207	6.86291	50.6716	190.6	1.43021	120.164	6.05029	47.5331	171.86	1.42882	117.098	6.05568	46.0879	167.312	1.39634	97.3936	5.70372	44.9898	135.995						1.45334	92.9826	12.3006	43.1801	135.136	1.37423	115.64	5.65403	47.7295	158.916	1.49908	169.13	30.3891	81.0734	253.54
1.40197	143.968	8.43265	52.8694	201.838	1.42325	151.99	6.01133	59.0355	216.32	1.41114	135.027	6.89058	50.7962	190.541	1.43235	118.974	6.07353	47.3153	170.412	1.41133	122.941	6.07778	46.237	173.51	1.39411	97.8443	5.72677	44.9863	136.406						1.42319	99.802	12.3263	43.4296	142.038	1.39334	110.627	5.67427	47.772	154.14	1.50132	168.312	30.409	81.0577	252.69
1.39872	145.44	8.45609	52.9383	203.43	1.40305	160.695	6.0337	59.1784	225.464	1.41966	132.091	6.91828	50.8194	187.525	1.43793	117.635	6.0976	47.4431	169.15	1.41229	122.895	6.09897	46.3352	173.563	1.41203	94.3256	5.7494	44.988	133.191						1.46801	90.4792	12.3562	43.3049	132.825	1.40033	109.035	5.69422	47.8455	152.685	1.50138	168.519	30.43	81.1728	253.01
1.40621	142.579	8.48112	52.9682	200.496	1.41452	155.995	6.05818	59.2444	220.658	1.41534	133.776	6.94213	50.8937	189.339	1.42532	122.009	6.12084	47.6674	173.901	1.42961	117.206	6.12012	46.2186	167.558	1.39989	97.1584	5.77054	45.2102	136.012						1.4347	97.2017	12.3832	43.3851	139.456	1.37368	116.513	5.7167	48.0238	160.052	1.51144	164.944	30.4505	81.1078	249.304
1.39932	145.504	8.50416	53.0496	203.605	1.4115	157.238	6.08041	59.2297	221.941	1.40526	137.87	6.96849	51.0556	193.743	1.42839	121.201	6.14413	47.7235	173.123	1.41769	121.371	6.14191	46.4185	172.067	1.42245	92.5142	5.79237	45.0483	131.597						1.47532	89.4447	12.411	43.4403	131.96	1.37548	116.154	5.73835	48.0883	159.767	1.50582	167.192	30.4713	81.2748	251.761
1.40435	143.953	8.53236	53.2075	202.16	1.42695	151.331	6.10203	59.3451	215.941	1.41255	135.408	6.99751	51.1335	191.27	1.43496	119.251	6.16631	47.7395	171.121	1.42918	117.979	6.16377	46.4768	168.614	1.37984	101.613	5.81518	45.3323	140.209						1.43578	97.6478	12.4384	43.6863	140.201	1.37675	115.644	5.75854	48.0199	159.213	1.51491	164.3	30.4921	81.359	248.899
1.40165	145.364	8.55544	53.3381	203.749	1.40623	160.371	6.12393	59.5642	225.518	1.41043	136.417	7.02244	51.2255	192.406	1.44694	115.637	6.19027	47.6809	167.319	1.41981	121.188	6.18482	46.5977	172.065	1.40422	96.5067	5.83681	45.3078	135.517						1.47199	90.4076	12.4644	43.6177	133.079	1.37473	116.478	5.77953	48.1336	160.127	1.51612	164.012	30.5127	81.415	248.66
1.40587	143.682	8.57857	53.3281	201.999	1.40481	160.656	6.14774	59.4519	225.69	1.41265	136.038	7.04791	51.3864	192.173	1.45018	114.879	6.2129	47.7325	166.595	1.43129	117.39	6.20657	46.4915	168.018	1.39168	99.1788	5.85807	45.3695	138.025						1.45718	93.3077	12.4901	43.6738	135.966	1.39693	110.429	5.82132	48.0859	154.261	1.51728	163.96	30.5334	81.5838	248.774
1.39526	148.338	8.60269	53.4827	206.969	1.41629	156.53	6.17296	59.7159	221.692	1.41339	135.967	7.07514	51.4634	192.175	1.4282	121.97	6.23619	48.0021	174.198	1.43642	116.108	6.2296	46.5786	166.779	1.39321	98.817	5.87914	45.3495	137.673						1.44743	95.3565	12.5174	43.7422	138.022	1.40067	109.71	5.84188	48.1789	153.667	1.51437	165.105	30.5539	81.6666	250.03
1.40139	145.962	8.62719	53.5184	204.551	1.40668	161.021	6.19463	59.8748	226.505	1.41182	136.67	7.10194	51.5107	192.954	1.44648	116.25	6.25933	47.8775	168.153	1.42857	118.796	6.25121	46.7251	169.708	1.39861	97.8053	5.90155	45.3912	136.791						1.46839	91.674	12.5437	43.9087	134.613	1.38726	113.478	5.86397	48.3169	157.423	1.52676	161.203	30.5745	81.7356	246.119
1.40062	146.543	8.6507	53.6178	205.251	1.42043	155.179	6.22043	59.848	220.421	1.41712	134.975	7.12713	51.5851	191.275	1.45071	115.026	6.28219	47.857	166.87	1.439	116.101	6.27334	46.8758	167.069	1.3982	97.9771	5.92505	45.433	136.992						1.45559	93.9762	12.57	43.8473	136.791	1.38432	114.735	5.8845	48.5122	158.83	1.52193	162.926	30.5943	81.8232	247.962
1.39899	147.588	8.6748	53.7622	206.475	1.41442	157.948	6.24315	59.9596	223.405	1.41805	134.884	7.15176	51.6794	191.271	1.46346	110.949	6.30464	47.5767	162.369	1.4402	115.634	6.29566	46.8269	166.536	1.40583	96.653	5.94681	45.5255	135.877						1.42138	101.703	12.5999	44.0833	144.558	1.37907	116.512	5.90477	48.6515	160.678	1.51756	164.566	30.6147	81.9267	249.739
1.40295	146.152	8.69871	53.8186	205.044	1.41025	159.792	6.27065	59.9947	225.347	1.41802	135.165	7.17643	51.7854	191.666	1.42936	121.912	6.32813	48.1239	174.257	1.41969	121.988	6.31963	46.8957	173.185	1.41507	94.9943	5.96976	45.584	134.423						1.46962	91.837	12.6259	44.097	134.965	1.37071	119.255	5.92529	48.7998	163.465	1.52189	163.552	30.6359	82.1325	248.908
1.3971	148.68	8.72346	53.8786	207.72	1.41131	159.864	6.29356	60.1957	225.619	1.40811	139.222	7.20512	51.954	196.04	1.43161	121.106	6.35613	48.0712	173.376	1.40884	126.451	6.33998	47.2269	178.15	1.40567	96.957	5.99083	45.6528	136.289						1.44664	96.3243	12.6527	44.1084	139.347	1.39133	113.155	5.94883	48.6361	157.436	1.51732	164.953	30.6565	82.0792	250.287
1.39981	147.578	8.74778	53.8792	206.582	1.41863	156.615	6.31559	60.1092	222.179	1.41144	138.239	7.23518	52.0538	195.116	1.44145	118.423	6.38175	48.1762	170.701	1.43089	118.659	6.36195	46.9481	169.788	1.39689	98.7524	6.01215	45.6687	137.946						1.45009	95.8981	12.6802	44.2344	139.061	1.36876	120.225	5.97043	48.9648	164.559	1.50762	168.709	30.6772	82.317	254.349
1.39808	148.957	8.77588	54.1215	208.253	1.40811	161.691	6.33763	60.3619	227.68	1.41761	136.125	7.25829	52.0929	192.972	1.42331	124.493	6.40387	48.3856	177.192	1.4118	125.241	6.38248	47.1441	176.815	1.4165	94.8937	6.03428	45.6665	134.417						1.46122	93.5493	12.7096	44.1536	136.696	1.40686	109.426	5.9917	48.7365	153.947	1.50482	169.758	30.6983	82.3535	255.456
1.39542	150.338	8.80031	54.2282	209.785	1.41228	160.046	6.35975	60.4176	226.03	1.41161	138.707	7.28361	52.2503	195.8	1.44621	117.349	6.42707	48.2971	169.711	1.41402	124.797	6.40302	47.2593	176.466	1.39702	98.9413	6.0558	45.7689	138.223						1.4152	104.102	12.7353	44.5012	147.325	1.39758	112.074	6.01387	48.8731	156.633	1.52307	163.836	30.7186	82.4664	249.534
1.40024	148.512	8.82418	54.2838	207.953	1.41587	158.599	6.38132	60.4324	224.555	1.41601	137.165	7.30803	52.276	194.227	1.43942	119.603	6.45022	48.4175	172.159	1.42628	121.067	6.4267	47.3395	172.675	1.40778	97.0823	6.0769	45.908	136.67						1.45354	95.4526	12.761	44.3482	138.745	1.38001	117.174	6.0345	49.0388	161.702	1.53097	160.505	30.739	81.7842	245.728
1.39682	150.225	8.84839	54.3944	209.837	1.41201	160.446	6.40344	60.5252	226.552	1.42009	136.092	7.33616	52.4167	193.263	1.44897	116.556	6.47322	48.2919	168.886	1.42102	122.956	6.44689	47.4178	174.723	1.40455	98.0437	6.09839	46.0605	137.707						1.47217	91.902	12.7898	44.3558	135.295	1.37518	118.959	6.05477	49.2101	163.59	1.51403	166.922	30.759	82.512	252.724
1.40334	147.678	8.87343	54.4387	207.243	1.43271	151.595	6.42604	60.3205	217.191	1.41535	138.201	7.36135	52.5725	195.602	1.43999	119.527	6.49643	48.4511	172.119	1.4277	120.924	6.46948	47.456	172.643	1.38356	102.505	6.11945	46.0956	141.822						1.43792	99.7476	12.8158	44.8293	143.429	1.37579	119.028	6.07578	49.3115	163.757	1.45061	192.316	30.7788	82.8662	278.976
1.40306	148.078	8.89684	54.5458	207.762	1.40936	162.023	6.44763	60.6809	228.349	1.41074	140.161	7.38613	52.6769	197.73	1.43476	121.401	6.5197	48.5763	174.181	1.42146	122.859	6.49223	47.449	174.64	1.40003	99.1903	6.14064	46.1692	138.869						1.48765	89.4891	12.8434	44.5325	133.128	1.37048	120.678	6.09652	49.3566	165.386	1.46213	188.172	30.7981	83.248	275.132
1.39575	151.257	8.92047	54.6078	211.117	1.41763	158.806	6.46956	60.8021	225.129	1.417	137.957	7.4102	52.7135	195.485	1.43586	121.427	6.5444	48.7212	174.352	1.42106	123.329	6.5144	47.5822	175.258	1.39705	99.819	6.16347	46.177	139.452						1.42371	102.669	12.8691	44.7339	146.17	1.38148	117.455	6.11706	49.3293	162.261	1.50148	171.506	30.818	82.619	257.514
1.40127	149.234	8.94312	54.7003	209.117	1.40702	163.845	6.49403	60.9887	230.533	1.41907	137.5	7.43922	52.8196	195.123	1.43271	122.281	6.56845	48.6753	175.192	1.42347	122.95	6.53497	47.7228	175.016	1.40986	97.1982	6.18521	46.1585	137.036						1.43633	100.199	12.895	44.8797	143.918	1.38591	116.509	6.13874	49.4515	161.471	1.43915	199.16	30.8381	83.4897	286.62
1.40287	148.929	8.96563	54.8232	208.928	1.41983	158.413	6.51827	60.9968	224.921	1.42077	137.231	7.46748	52.9485	194.973	1.44512	118.578	6.59221	48.6721	171.36	1.4183	124.616	6.5561	47.7335	176.743	1.41718	95.8354	6.20819	46.1808	135.816						1.4298	101.392	12.9212	44.7766	144.97	1.39421	114.578	6.15874	49.5788	159.747	1.44992	193.428	30.8579	83.1687	280.455
1.4013	149.74	8.98899	54.8898	209.83	1.42198	157.782	6.54278	61.0863	224.363	1.42012	137.637	7.49692	53.0152	195.46	1.42665	124.071	6.61519	48.6384	177.006	1.44409	116.201	6.57839	47.5081	167.806	1.40831	97.9621	6.22928	46.375	137.961						1.47063	93.1749	12.9467	44.8286	137.025	1.40358	112.07	6.1788	49.5437	157.299	1.46022	188.829	30.8788	83.1413	275.731
1.40418	148.773	9.01386	54.9647	208.904	1.41266	162.047	6.5654	61.2331	228.917	1.41579	139.635	7.52175	53.1827	197.694	1.44139	119.967	6.63937	48.8017	172.92	1.42128	123.908	6.59888	47.8261	176.107	1.39059	101.747	6.25765	46.4363	141.488						1.4492	97.8091	12.9733	45.0295	141.745	1.38526	117.455	6.1997	49.7724	162.705	1.44206	197.787	30.9001	83.5018	285.221
1.40143	150.113	9.03687	55.0458	210.373	1.40606	165.185	6.58902	61.3332	232.259	1.40891	142.585	7.54815	53.327	200.89	1.45382	116.556	6.66188	48.8558	169.451	1.42602	122.553	6.62325	47.8857	174.762	1.40684	98.2659	6.28723	46.3771	138.244						1.43268	101.548	12.9988	45.1276	145.486	1.41112	110.59	6.22038	49.7246	156.056	1.44204	197.602	30.9205	83.4136	284.949
1.40318	149.76	9.06	55.1816	210.14	1.41102	163.293	6.61201	61.4392	230.409	1.41269	141.23	7.5739	53.3532	199.514	1.45199	117.289	6.68391	48.944	170.302	1.41774	125.623	6.64475	48.0458	178.101	1.41013	97.8479	6.30988	46.4914	137.979						1.43332	101.586	13.0254	45.2024	145.606	1.39447	114.959	6.24112	49.7755	160.307	1.44162	197.783	30.9413	83.4055	285.128
1.39934	151.57	9.08347	55.2644	212.098	1.40958	164.074	6.63416	61.4914	231.275	1.42435	136.979	7.59765	53.3427	195.105	1.44228	120.088	6.70706	48.9485	173.201	1.41667	126.166	6.66725	48.1228	178.736	1.41078	97.7468	6.33937	46.4995	137.899						1.46153	95.8623	13.0519	45.2798	140.106	1.36798	123.197	6.26206	50.0802	168.532	1.44046	199.023	30.9609	83.6955	286.684
1.39989	151.684	9.10763	55.3868	212.341	1.41162	163.242	6.65784	61.5192	230.434	1.40784	143.975	7.62442	53.6891	202.694	1.42654	125.002	6.72932	48.9873	178.321	1.43824	118.842	6.68787	47.8776	170.923	1.40237	99.8113	6.36068	46.6821	139.972						1.44029	100.597	13.08	45.4474	144.888	1.37445	121.538	6.28283	50.1883	167.048	1.43414	202.982	30.9814	84.0753	291.104
1.39913	152.068	9.13206	55.4184	212.763	1.42118	159.75	6.67939	61.7283	227.034	1.42097	138.935	7.64943	53.6364	197.423	1.45154	117.488	6.75454	48.9852	170.539	1.43409	120.469	6.71022	48.049	172.763	1.39575	101.379	6.38346	46.7725	141.5						1.45659	97.2551	13.1052	45.4704	141.661	1.36443	125.006	6.30317	50.3688	170.563	1.43253	203.753	31.0018	84.0693	291.881
1.3998	152.046	9.15513	55.5092	212.835	1.40785	165.759	6.70142	61.8417	233.364	1.41412	141.901	7.67327	53.8077	200.666	1.44382	119.976	6.77705	49.0892	173.224	1.41341	127.653	6.73241	48.2738	180.426	1.4066	99.2129	6.40483	46.8054	139.553						1.48151	92.2623	13.1341	45.3657	136.688	1.40015	114.242	6.32569	50.1134	159.956	1.41834	211.205	31.0224	84.147	299.56
1.39756	153.332	9.18072	55.6381	214.29	1.42037	160.367	6.72334	61.8313	227.78	1.4155	141.742	7.70079	53.9445	200.636	1.44999	118.212	6.80077	49.0948	171.407	1.42327	124.519	6.75458	48.3173	177.225	1.41525	97.4678	6.4265	46.7898	137.941						1.45663	97.1344	13.1614	45.4202	141.489	1.36736	124.429	6.34592	50.5005	170.138	1.43735	201.083	31.0426	83.9342	289.026
1.40178	151.856	9.20654	55.7416	212.868	1.41069	164.506	6.74574	61.8412	232.067	1.41526	141.972	7.72467	53.9982	200.928	1.42018	128.299	6.82539	49.4676	182.208	1.41998	126.218	6.77499	48.5462	179.227	1.39415	102.205	6.44878	46.9979	142.489						1.4538	98.1048	13.187	45.6011	142.625	1.39226	116.998	6.36722	50.3976	162.891	1.42701	207.018	31.0638	84.2719	295.416
1.4039	151.161	9.23472	55.8067	212.214	1.41537	162.986	6.77242	62.0335	230.686	1.41743	141.298	7.74945	54.0511	200.281	1.44038	121.492	6.84874	49.2928	174.994	1.43748	119.971	6.79808	48.2586	172.455	1.40217	100.701	6.47009	47.0796	141.2						1.45373	98.1397	13.2137	45.612	142.669	1.39127	117.523	6.38771	50.5077	163.505	1.44083	199.981	31.0848	84.1763	288.139
1.40631	150.661	9.25851	55.9857	211.877	1.40701	166.624	6.79429	62.0238	234.442	1.42049	140.548	7.77704	54.1894	199.647	1.43199	124.119	6.8718	49.3196	177.737	1.41961	126.189	6.81932	48.4983	179.139	1.41071	98.9204	6.49079	47.0542	139.548						1.4442	100.161	13.2421	45.6248	144.652	1.3773	121.825	6.40825	50.6565	167.789	1.41677	211.465	31.1053	84.5549	299.597
1.40597	150.868	9.28248	56.0106	212.116	1.4102	165.411	6.81715	62.1038	233.262	1.41861	141.555	7.80337	54.314	200.811	1.45392	117.875	6.8947	49.4229	171.381	1.4184	127.119	6.84181	48.6966	180.306	1.41669	97.6306	6.51253	47.0029	138.312						1.44153	101.116	13.269	45.8003	145.762	1.38988	118.285	6.42906	50.6734	164.401	1.42235	209.473	31.1266	84.2118	297.943
1.41133	148.908	9.30679	56.0796	210.158	1.42206	160.547	6.83953	62.1766	228.308	1.41447	143.441	7.82946	54.443	202.894	1.45084	118.72	6.91974	49.415	172.244	1.428	123.566	6.86294	48.524	176.452	1.40443	100.559	6.53403	47.2323	141.228						1.44139	101.457	13.2952	45.9448	146.238	1.40176	115.159	6.45013	50.7019	161.426	1.4161	216.578	31.1475	84.6358	306.695
1.41079	149.388	9.3299	56.1805	210.756	1.41389	164.455	6.86274	62.3481	232.522	1.41283	144.345	7.85627	54.5497	203.935	1.44333	121.305	6.94287	49.5751	175.082	1.42183	125.787	6.88561	48.6275	178.848	1.40226	100.963	6.55583	47.2127	141.576						1.44	101.945	13.3225	46.0263	146.801	1.39932	116.027	6.47045	50.7988	162.359	1.44336	202.092	31.1672	84.2034	291.691
1.40522	152.008	9.35342	56.3194	213.605	1.4171	162.972	6.88583	62.3128	230.948	1.42086	141.443	7.88456	54.59	200.971	1.45438	117.964	6.96637	49.5124	171.563	1.42946	123.715	6.90631	48.7568	176.845	1.39535	102.833	6.57679	47.4038	143.488						1.46767	96.1315	13.3488	45.9785	141.089	1.39143	118.183	6.49106	50.8114	164.445	1.44738	200.803	31.1886	84.4372	290.638
1.39575	156.353	9.37771	56.4488	218.229	1.41022	166.64	6.90753	62.558	234.999	1.41784	142.932	7.91162	54.7402	202.655	1.43313	124.88	6.98958	49.7618	178.97	1.42626	124.958	6.92739	48.8535	178.224	1.40885	99.6843	6.5988	47.2441	140.44						1.41379	107.908	13.3756	45.985	152.559	1.38066	122.107	6.51254	51.1855	168.589	1.42116	214.836	31.2089	84.7267	305.315
1.40494	152.748	9.4018	56.5512	214.602	1.40357	169.992	6.93011	62.6961	238.596	1.41272	145.194	7.93941	54.8558	205.119	1.45374	118.439	7.0129	49.6385	172.18	1.42789	124.135	6.94982	48.7419	177.251	1.41548	98.5318	6.62007	47.3205	139.47						1.44164	101.865	13.4041	46.1557	146.854	1.39068	119.166	6.53354	51.1463	165.723	1.44406	202.922	31.2292	84.6546	293.031
1.39856	155.707	9.42515	56.6539	217.766	1.41775	163.726	6.95348	62.7068	232.122	1.41467	144.929	7.96861	55.0364	205.027	1.45034	119.724	7.03582	49.7698	173.641	1.42141	126.922	6.97205	49.0127	180.408	1.42219	97.3602	6.6415	47.3842	138.465						1.44628	101.246	13.4308	46.3315	146.43	1.38186	122.028	6.55362	51.2962	168.625	1.42428	215.785	31.2483	84.7954	307.338
1.39327	157.847	9.4482	56.5945	219.924	1.40607	168.953	6.97588	62.7374	237.56	1.4133	145.656	7.99399	55.1133	205.857	1.45752	117.42	7.05973	49.6576	171.143	1.42387	126.407	6.99472	49.1237	179.987	1.39462	103.301	6.66425	47.5483	144.066						1.4178	107.942	13.4594	46.4194	153.039	1.3971	117.462	6.57569	51.1706	164.106	1.42179	217.561	31.2695	84.9149	309.327
1.40171	154.261	9.47227	56.6157	216.229	1.42138	162.629	7.00101	62.8847	231.157	1.40656	148.778	8.01844	55.2946	209.264	1.43672	124.025	7.08225	49.8656	178.189	1.4335	123.519	7.0167	49.1919	177.064	1.40753	100.72	6.68561	47.607	141.767						1.44768	101.123	13.487	46.4096	146.394	1.37804	123.528	6.59569	51.4548	170.227	1.43064	213.364	31.2902	84.8788	305.246
1.41096	150.672	9.49626	56.687	212.592	1.42419	160.895	7.02328	62.6579	229.145	1.41796	144.412	8.04388	55.3215	204.771	1.44952	120.025	7.10686	49.7971	173.978	1.43359	123.191	7.03993	49.0708	176.606	1.40166	101.926	6.71083	47.6013	142.866						1.42211	107.171	13.5141	46.5315	152.409	1.39645	118.372	6.61744	51.4887	165.301	1.45269	201.547	31.3106	84.5761	292.786
1.39351	158.412	9.52036	56.8338	220.748	1.4147	165.734	7.05954	62.9579	234.464	1.42342	142.352	8.06991	55.3048	202.626	1.4468	121.353	7.13068	50.0226	175.574	1.42355	126.58	7.06175	49.1515	180.193	1.39529	103.642	6.73224	47.7721	144.61						1.42287	107.303	13.5456	46.671	152.678	1.38112	123.122	6.63832	51.6681	170.047	1.44228	207.774	31.3307	85.0516	299.669
1.39984	155.853	9.5457	56.9072	218.168	1.41143	167.801	7.08223	63.2076	236.839	1.41194	147.254	8.09473	55.5203	207.913	1.43894	124.283	7.15735	50.2466	178.836	1.42165	127.722	7.08296	49.3484	181.576	1.40663	101.478	6.75348	47.8773	142.742						1.43294	105.071	13.5736	46.7242	150.56	1.37089	126.272	6.65881	51.6963	173.105	1.43999	208.614	31.3504	84.9226	300.403
1.40351	154.295	9.56929	56.9024	216.555	1.40525	170.743	7.1038	63.2508	239.937	1.4116	147.773	8.12067	55.6675	208.597	1.45205	120.086	7.18071	50.1238	174.371	1.42329	127.496	7.10503	49.475	181.464	1.41961	98.8063	6.77551	47.8455	140.266						1.4488	101.542	13.6005	46.7099	147.114	1.37059	126.62	6.67921	51.7997	173.544	1.44869	203.685	31.3704	84.6673	295.076
1.40788	152.734	9.59252	56.9916	215.031	1.40877	169.286	7.12645	63.3114	238.486	1.41497	146.53	8.14708	55.6897	207.336	1.43814	124.45	7.2051	50.215	178.977	1.419	128.906	7.12719	49.4688	182.917	1.39905	103.262	6.79697	47.969	144.468						1.43319	105.159	13.6289	46.789	150.713	1.36002	130.564	6.70062	52.0341	177.569	1.43052	214.32	31.3919	85.1997	306.59
1.40377	154.748	9.61548	57.1136	217.231	1.41395	167.391	7.14868	63.4622	236.682	1.41142	148.554	8.17214	55.9333	209.672	1.43887	124.492	7.22786	50.324	179.129	1.42857	125.813	7.14849	49.4823	179.733	1.40982	100.931	6.81889	47.9283	142.295						1.43958	104.282	13.6555	47.0397	150.122	1.39502	119.761	6.72148	51.9194	167.069	1.4518	206.153	31.4118	84.9195	299.293
1.40299	155.297	9.63873	57.1862	217.88	1.41901	165.371	7.17043	63.5433	234.664	1.41433	147.467	8.19967	55.9534	208.567	1.44983	120.903	7.2532	50.1944	175.288	1.43456	124.318	7.16912	49.6324	178.341	1.39716	104.057	6.83983	48.1482	145.384						1.42075	108.736	13.6822	47.068	154.486	1.38986	121.508	6.74418	52.0486	168.879	1.44787	208.903	31.4321	85.2154	302.464
1.40265	155.411	9.66182	57.1811	217.987	1.41323	167.977	7.19223	63.5629	237.389	1.41544	147.367	8.22605	56.0787	208.589	1.43887	124.759	7.27739	50.4322	179.513	1.43017	125.868	7.19201	49.707	180.013	1.41042	101.122	6.86115	48.0757	142.624						1.42834	107.289	13.708	47.2252	153.245	1.40018	118.536	6.76468	52.0012	165.972	1.43824	213.791	31.4517	85.1403	307.482
1.40876	153.204	9.6848	57.3054	215.827	1.4024	173.575	7.21583	63.8177	243.421	1.40997	149.969	8.25025	56.2506	211.451	1.43597	125.88	7.30367	50.5242	180.76	1.4329	124.737	7.21268	49.5867	178.736	1.40803	101.889	6.88241	48.208	143.462						1.44724	103.29	13.7477	47.3634	149.487	1.39183	121.318	6.78643	52.2096	168.854	1.44288	212.037	31.4722	85.3764	305.943
1.40129	156.416	9.7084	57.3333	219.185	1.41094	169.402	7.23793	63.7221	239.017	1.42064	145.843	8.27594	56.258	207.19	1.46817	115.919	7.32643	50.2549	170.189	1.42336	128.601	7.23485	49.9127	183.046	1.3997	103.762	6.90408	48.2675	145.236						1.43472	105.97	13.777	47.3	152.037	1.3974	119.777	6.80679	52.2122	167.375	1.43945	215.871	31.4927	85.2287	310.735
1.3979	158.275	9.73249	57.4838	221.253	1.40493	172.432	7.2603	63.8311	242.255	1.41955	146.674	8.29904	56.4176	208.21	1.43714	125.679	7.34887	50.5873	180.618	1.42254	129.125	7.25569	50.0044	183.686	1.40598	102.551	6.92525	48.3184	144.184						1.42724	108.275	13.8044	47.5494	154.533	1.3743	127.048	6.82799	52.4489	174.603	1.44011	215.994	31.5131	85.4155	311.057
1.40233	156.464	9.75562	57.5199	219.415	1.39997	175.698	7.28292	64.169	245.972	1.42075	146.474	8.32504	56.5163	208.103	1.43313	127.576	7.37315	50.8413	182.833	1.44135	122.751	7.2773	49.8486	176.927	1.41046	101.685	6.94721	48.3487	143.423						1.45529	101.719	13.8313	47.435	148.031	1.37198	127.92	6.8484	52.5119	175.503	1.4535	211.922	31.5329	85.04	308.029
1.40403	155.793	9.77928	57.5372	218.738	1.40371	173.66	7.30457	64.0687	243.769	1.41743	148.158	8.34985	56.6736	210.003	1.45455	120.589	7.39811	50.6361	175.402	1.42962	126.817	7.29932	50.0142	181.3	1.39544	105.221	6.96855	48.5159	146.83						1.47002	98.8668	13.8614	47.5199	145.336	1.38217	124.938	6.87043	52.5586	172.685	1.4426	214.859	31.5531	85.4001	309.956
1.39664	159.07	9.80255	57.5729	222.164	1.41903	167.094	7.32754	64.214	237.112	1.41357	149.788	8.37434	56.7201	211.736	1.44527	123.604	7.42416	50.756	178.642	1.42297	129.446	7.32376	50.1864	184.197	1.39536	105.314	6.98965	48.5503	146.952						1.43856	105.768	13.8875	47.61	152.154	1.38516	124.159	6.89072	52.6033	171.981	1.44893	211.547	31.5745	85.3145	306.517
1.40345	156.24	9.82899	57.6127	219.275	1.41977	166.389	7.34975	64.0669	236.233	1.4121	150.895	8.40123	56.9171	213.079	1.44881	122.618	7.44716	50.7856	177.65	1.44077	123.251	7.34534	49.9789	177.576	1.41083	102.322	7.01116	48.688	144.359						1.4129	112.189	13.9204	47.7137	158.511	1.38879	123.706	6.91102	52.8584	171.801	1.43646	219.709	31.5961	85.8016	315.603
1.40147	157.285	9.85191	57.6838	220.431	1.4114	170.689	7.37155	64.2919	240.91	1.41252	150.927	8.42729	56.991	213.186	1.43377	127.552	7.47007	50.9088	182.88	1.42203	129.579	7.36671	50.1143	184.265	1.40608	103.171	7.0321	48.6207	145.067						1.42984	108.798	13.9706	48.0581	155.563	1.39391	121.727	6.9359	52.6361	169.677	1.44246	216.658	31.6163	85.5472	312.519
1.39882	158.714	9.87579	57.7866	222.012	1.41639	168.768	7.39392	64.4085	239.041	1.42151	147.694	8.45311	57.1009	209.949	1.44502	124.37	7.49461	51.0442	179.717	1.4183	131.666	7.3877	50.4319	186.743	1.39757	105.15	7.05333	48.6979	146.954						1.44808	104.363	13.9984	47.94	151.127	1.36998	129.85	6.9564	53.0448	177.891	1.41049	100.116	31.7361	41.8157	141.213
1.40206	157.422	9.89907	57.8259	220.715	1.42306	165.849	7.41528	64.3903	236.013	1.42614	145.831	8.48157	57.054	207.975	1.45584	120.603	7.51746	50.8013	175.579	1.42103	130.672	7.40954	50.4119	185.69	1.41018	102.496	7.07452	48.7066	144.538						1.44636	105.042	14.0266	48.0746	151.929	1.38932	124.005	6.97742	53.0533	172.283	1.40426	103.066	31.7566	41.9104	144.731
1.39965	158.619	9.92203	57.883	222.011	1.41747	168.588	7.43677	64.5155	238.968	1.42326	147.395	8.50617	57.2425	209.782	1.43874	126.166	7.54109	50.9866	181.52	1.42259	130.354	7.43225	50.4931	185.441	1.41036	102.589	7.09548	48.7676	144.688						1.45428	103.772	14.0639	48.2923	150.914	1.38569	125.467	6.99738	53.2237	173.859	1.40852	101.355	31.7767	41.9199	142.76
1.40426	156.753	9.94556	57.9289	220.123	1.41351	170.679	7.45807	64.6385	241.256	1.42391	147.44	8.53066	57.3559	209.942	1.45017	122.856	7.56405	51.0517	178.162	1.42039	131.329	7.45473	50.5819	186.539	1.39692	105.607	7.11667	48.8442	147.525						1.43043	109.462	14.0927	48.4068	156.579	1.40647	119.22	7.01798	53.0524	167.679	1.396	105.346	31.7973	41.9351	147.063
1.40111	158.497	9.96955	58.073	222.071	1.41399	170.663	7.48222	64.7243	241.316	1.4121	152.669	8.55398	57.5887	215.585	1.43817	126.738	7.58694	51.1407	182.271	1.42998	128.243	7.47674	50.6234	183.385	1.39231	106.984	7.13823	49.009	148.955						1.43019	109.468	14.1203	48.3854	156.56	1.4148	117.436	7.03909	53.2386	166.149	1.40078	103.997	31.8178	41.8956	145.677
1.40679	155.835	9.99328	57.9848	219.227	1.42763	164.421	7.50631	64.5952	234.732	1.41619	151.176	8.57919	57.6407	214.094	1.44208	125.865	7.60921	51.2805	181.508	1.42387	130.166	7.49866	50.5861	185.339	1.4089	103.478	7.1595	49.0459	145.789						1.45981	102.741	14.1552	48.3597	149.982	1.36993	130.863	7.0599	53.451	179.273	1.42332	98.1647	31.8384	41.7597	139.72
1.4055	156.767	10.0171	58.1264	220.336	1.41789	169.083	7.52963	64.7849	239.741	1.41323	152.642	8.60323	57.7494	215.719	1.44393	125.195	7.63133	51.2421	180.774	1.4267	129.357	7.52199	50.6383	184.553	1.4116	102.879	7.18127	49.028	145.224						1.4479	105.946	14.1865	48.6511	153.4	1.37891	128.666	7.081	53.7087	177.419	1.40676	102.679	31.8592	41.9773	144.444
1.40232	158.416	10.0401	58.2346	222.15	1.41532	171.002	7.55047	65.0691	242.024	1.41635	151.748	8.62901	57.8785	214.927	1.44623	125.157	7.65583	51.5176	181.006	1.42459	130.345	7.54364	50.7485	185.688	1.39602	106.452	7.20296	49.1441	148.608						1.46757	101.371	14.225	48.4796	148.769	1.37909	128.802	7.10333	53.7888	177.63	1.40847	101.935	31.8786	41.8455	143.572
1.39885	159.937	10.0647	58.2366	223.728	1.4203	168.647	7.57173	65.0117	239.529	1.41497	152.67	8.65305	58.0252	216.024	1.4404	127.015	7.67796	51.5359	182.952	1.42173	132.067	7.5756	51.0277	187.763	1.42649	100.206	7.22441	49.1841	142.943						1.45735	103.949	14.2652	48.6818	151.49	1.39033	125.277	7.12523	53.7249	174.177	1.42205	99.7518	31.8991	41.8816	141.852
1.40555	157.221	10.0894	58.3039	220.981	1.41758	170.089	7.59326	65.1099	241.115	1.41905	151.326	8.67699	58.1311	214.74	1.46582	119.29	7.7	51.4336	174.858	1.42505	130.55	7.59717	50.8838	186.04	1.40506	104.686	7.24709	49.2337	147.09						1.43448	109.561	14.2953	48.8847	157.163	1.40461	121.365	7.15224	53.776	170.47	1.40778	103.706	31.9192	42.0535	145.996
1.39837	160.728	10.113	58.4533	224.758	1.41078	173.349	7.61533	65.1877	244.558	1.42214	150.271	8.70385	58.1902	213.707	1.43545	129.173	7.7226	51.7723	185.422	1.42047	132.522	7.61964	51.0538	188.244	1.40809	104.296	7.27695	49.3497	146.859						1.45365	105.455	14.3251	49.0129	153.294	1.38592	126.966	7.17466	53.8872	175.964	1.42387	99.4155	31.94	41.9153	141.555
1.40062	159.699	10.1355	58.4326	223.678	1.41736	170.433	7.63784	65.213	241.566	1.41416	153.995	8.72793	58.4045	217.773	1.43952	127.737	7.74574	51.7149	183.881	1.43544	127.557	7.64144	51.0494	183.101	1.41244	103.505	7.29804	49.4094	146.194						1.46449	102.94	14.3615	48.9214	150.755	1.39377	125.003	7.19557	54.0373	174.226	1.41242	102.131	31.9602	41.8884	144.251
1.40625	157.368	10.1598	58.4674	221.298	1.41089	173.946	7.65966	65.4262	245.419	1.41661	153.347	8.75681	58.5317	217.234	1.4383	128.365	7.76949	51.8185	184.626	1.42654	130.837	7.66326	51.1962	186.644	1.41017	104.243	7.32148	49.5342	147						1.45665	104.853	14.388	49.353	152.735	1.37005	132.786	7.21655	54.2524	181.924	1.41098	102.694	31.9806	41.9709	144.899
1.40648	157.322	10.1828	58.4871	221.27	1.41121	173.864	7.68174	65.4451	245.358	1.4219	151.243	8.78151	58.5311	215.053	1.44113	127.733	7.79405	51.9224	184.081	1.42522	131.285	7.68533	51.1973	187.11	1.39971	106.47	7.34264	49.5274	149.028						1.4299	111.729	14.4145	49.418	159.76	1.37391	131.785	7.23814	54.3516	181.061	1.40289	105.043	32.0003	42.0801	147.364
1.40245	159.121	10.2063	58.5174	223.159	1.40595	176.441	7.70336	65.4983	248.066	1.41974	152.393	8.80568	58.6488	216.358	1.45163	124.025	7.81808	51.72	180.039	1.42115	132.97	7.70621	51.3104	188.971	1.39834	107.041	7.36366	49.6518	149.679						1.43438	110.783	14.4401	49.4098	158.905	1.37432	131.73	7.25916	54.3851	181.039	1.40851	103.685	32.0212	42.1217	146.041
1.40118	159.805	10.2308	58.5631	223.914	1.41462	172.686	7.72629	65.6047	244.285	1.42787	149.246	8.83154	58.6493	213.103	1.43658	129.46	7.84142	52.0359	185.979	1.42661	131.438	7.72897	51.4348	187.511	1.39869	107.104	7.38511	49.7173	149.804						1.42976	111.881	14.4672	49.5224	159.964	1.39052	126.871	7.27989	54.4332	176.417	1.41526	101.773	32.0418	42.0321	144.036
[truncated: 3,921 more rows]
[truncated: 15 more columns]

[truncated: 7 more sheets: wt BaF3, wt THP-1, 5uM STLC_wt L1210, 50nM Barasertib_FUCCI L1210, 10uM EIPA_FUCCI L1210, 10uM Brefeldin A_FUCCI L1210, 15uM Vacuolin-1_FUCCI L1210]
